# Supplementary material for: Spatially Enriched Paralog Rearrangements Argue Functionally Diverse Ribosomes Arise during Cold Acclimation in Arabidopsis
Source: Int J Mol Sci. 2021 Jun 7;22(11):6160. doi: 10.3390/ijms22116160 (PMC8201131; doi:10.3390/ijms22116160)
Supplement: Supplementary file 1 [file ijms-22-06160-s001.zip]

Archive with 18 entries (18 files):
- Figure S6.tif
- Figure S7.tif
- Figure S8.tif
- Figure S9.tif
- legend.pdf
- Table S1.xlsx
- Table S2.xlsx
- Table S3.xlsx
- Table S4.xlsx
- Table S5.xlsx
- Table S6.xlsx
- Table S7.xlsx
- Table S8.xlsx
- Figure S1.tif
- Figure S2.tif
- Figure S3.tif
- Figure S4.tif
- Figure S5.tif
