# Supplementary material for: Spatially Enriched Paralog Rearrangements Argue Functionally Diverse Ribosomes Arise during Cold Acclimation in Arabidopsis
Source: Int J Mol Sci. 2021 Jun 7;22(11):6160. doi: 10.3390/ijms22116160 (PMC8201131; doi:10.3390/ijms22116160)
Supplement: Supplementary file 1 [file ijms-22-06160-s001.zip › Table S1.xlsx]

## Sheet: 1A (Whole_plant_growth)
Table S1A. Successive dry weight measurements of Arabidopsis thaliana seedlings reared until the stage 1.10 and shifted for a 7 days period of cold acclimation, the desired morphological stage featured plants with 10 leaves of at least 1mm in length and was reached approximately 21 days after sowing. The hydroponic sterile cultivation system has been described previously. shoots were harvested, w…	Treatments	Time points (h)	Bags	Bag FW (g)	Bag DW (g)	Bag + plant FW (g)	Bag + plant DW (g)	# plants	Predicted bag DW (y = 0.8788x + 0.0745)	Treatment (Temperature of medium)	Treatment (h)	Treatment (days)	Concatenated	Plant FW (g) [(G-E)/I]	Plant DW (g) [(H-J)/I]	FW/DW [O/P]	Replicate averages DW (g)	Stnadard deviation DW
12.02.2019 - Day 18 - Morning (9:30-10:00am) - Shift to temperature: 24 trampolines 10°C, 24 trampolines 20°C, 24 trampolines 30°C	20°C	0	4	0.8311	0.835	0.9131	0.8365	3	0.804871	10°C	1	0	10°C_1	0.0068	0.00697943	0.974292	0.00703296	0.00142449
	20°C	0	5	0.8365	0.8226	0.9135	0.8283	3	0.809616	10°C	1	0	10°C_1	0.0227667	0.00813193	2.79966
	20°C	0	6	0.8431	0.8382	0.899	0.8361	3	0.815416	10°C	1	0	10°C_1	0.0152333	0.00598752	2.54418
	30°C	0	7	0.8398	0.827	0.8699	0.8338	3	0.812516	10°C	48	2	10°C_48	0.0234667	0.00618747	3.79261	0.00618747	0.000403514
	30°C	0	8	0.8418	0.8305	0.8778	0.8364	3	0.814274	10°C	48	2	10°C_48	0.0286	0.00687128	4.16225
	30°C	0	9	0.8385	0.8318	0.8809	0.838	3	0.811374	10°C	48	2	10°C_48	0.0219	0.0061582	3.55623
	10°C	0	10	0.8419	0.8262	0.8623	0.8353	3	0.814362	10°C	72	3	10°C_72	0.0130667	0.006241	2.09368	0.006241	0.000434282
	10°C	0	11	0.8465	0.8425	0.9148	0.8428	3	0.818404	10°C	72	3	10°C_72	0.0231667	0.0053764	4.30896
	10°C	0	12	0.8388	0.823	0.8845	0.8296	3	0.811637	10°C	72	3	10°C_72	0.0273333	0.00588048	4.64815
14.02.2019 -Day 20 - Morning (8am)	20°C	48	16	0.8418	0.8284	0.936	0.8336	3	0.814274	10°C	84	3.5	10°C_84	0.0177333	0.00528245	3.35703	0.00528245	0.000962287
	20°C	48	17	0.8514	0.8335	0.9663	0.8487	3	0.82271	10°C	84	3.5	10°C_84	0.0115333	0.00605723	1.90406
	20°C	48	18	0.844	0.833	0.9568	0.8392	3	0.816207	10°C	84	3.5	10°C_84	0.0119333	0.00719555	1.65843
	30°C	48	19	0.853	0.8303	0.894	0.8434	3	0.824116	10°C	144	6	10°C_144	0.0111	0.0069804	1.59017	0.0069804	0.000261623
	30°C	48	20	0.8639	0.849	0.9082	0.8508	3	0.833695	10°C	144	6	10°C_144	0.0110667	0.00674813	1.63996
	30°C	48	21	0.8523	0.836	0.9267	0.8459	3	0.823501	10°C	144	6	10°C_144	0.0134	0.00727032	1.84311
	10°C	48	22	0.852	0.8368	0.9224	0.8418	3	0.823238	10°C	168	7	10°C_168	0.0122667	0.00573595	2.13856	0.00573595	0.000713518
	10°C	48	23	0.8582	0.8393	0.944	0.8493	3	0.828686	10°C	168	7	10°C_168	0.0197	0.00681269	2.89166
	10°C	48	24	0.8455	0.8338	0.9112	0.836	3	0.817525	10°C	168	7	10°C_168	0.0193	0.00708536	2.72393
15.02.2019 - Day 21.1 - Morning (8am) - Shift to new medium	20°C	72	28	0.8442	0.8174	0.9631	0.8364	3	0.816383	20°C	1	0	20°C_1	0.0273333	0.0105431	2.59253	0.00788854	0.00232296
	20°C	72	29	0.8508	0.8223	0.9933	0.8528	3	0.822183	20°C	1	0	20°C_1	0.0256667	0.00622793	4.12122
	20°C	72	30	0.8406	0.8188	0.9955	0.8371	3	0.813219	20°C	1	0	20°C_1	0.0186333	0.00689457	2.70261
	30°C	72	31	0.8461	0.8251	0.963	0.8393	3	0.818053	20°C	48	2	20°C_48	0.0314	0.00644205	4.87422	0.00758985	0.00111246
	30°C	72	32	0.85	0.8245	0.9199	0.8414	3	0.82148	20°C	48	2	20°C_48	0.0383	0.00866323	4.42099
	30°C	72	33	0.846	0.8202	0.95	0.8385	3	0.817965	20°C	48	2	20°C_48	0.0376	0.00766427	4.90588
	10°C	72	34	0.8525	0.825	0.8917	0.8424	3	0.823677	20°C	72	3	20°C_72	0.0396333	0.00667235	5.93994	0.00827941	0.00178815
	10°C	72	35	0.841	0.8155	0.9105	0.8297	3	0.813571	20°C	72	3	20°C_72	0.0475	0.0102057	4.65428
	10°C	72	36	0.8312	0.8075	0.9132	0.8226	3	0.804959	20°C	72	3	20°C_72	0.0516333	0.00796024	6.4864
15.02.2019 - Day 21.2 - Afternoon (6pm)	20°C	84	37	0.8481	0.8235	0.8634	0.8344	1	0.81981	20°C	84	3.5	20°C_84	0.0153	0.0145897	1.04868	0.0145897	0.0023592
	20°C	84	38	0.8553	0.8268	0.8872	0.8448	1	0.826138	20°C	84	3.5	20°C_84	0.0319	0.0186624	1.70932
	20°C	84	39	0.8322	0.808	0.8776	0.8204	1	0.805837	20°C	84	3.5	20°C_84	0.0454	0.0145626	3.11757
	30°C	84	43	0.841	0.8137	0.9351	0.8367	3	0.813571	20°C	144	6	20°C_144	0.0675	0.0174898	3.85938	0.0191403	0.00144776
	30°C	84	44	0.845	0.82	0.8937	0.84	3	0.817086	20°C	144	6	20°C_144	0.0545	0.0197352	2.76156
	30°C	84	45	0.841	0.8182	0.9393	0.8396	3	0.813571	20°C	144	6	20°C_144	0.0615	0.0201958	3.04519
	10°C	84	46	0.8428	0.8139	0.896	0.831	3	0.815153	20°C	168	7	20°C_168	0.0715	0.0231928	3.08285	0.0231928	0.00395519
	10°C	84	47	0.8364	0.8045	0.871	0.8277	3	0.809528	20°C	168	7	20°C_168	0.0274	0.0202504	1.35306
	10°C	84	48	0.8522	0.822	0.888	0.845	3	0.823413	20°C	168	7	20°C_168	0.053	0.0153626	3.44995
18.02.2019 - Day 24	20°C	144	52	0.8382	0.8247	0.9057	0.8286	1	0.81111	30°C	1	0	30°C_1	0.0100333	0.00709459	1.41422	0.00778179	0.000957443
	20°C	144	53	0.846	0.8325	0.9005	0.8377	1	0.817965	30°C	1	0	30°C_1	0.012	0.00737539	1.62703
	20°C	144	54	0.8465	0.8312	0.908	0.8386	1	0.818404	30°C	1	0	30°C_1	0.0141333	0.0088754	1.59242
	30°C	144	55	0.848	0.831	0.9802	0.846	3	0.819722	30°C	48	2	30°C_48	0.0136667	0.00642787	2.12616	0.00653189	0.000886934
	30°C	144	56	0.844	0.8305	0.945	0.8423	3	0.816207	30°C	48	2	30°C_48	0.0147667	0.00570156	2.58993
	30°C	144	57	0.841	0.8278	0.9862	0.8394	3	0.813571	30°C	48	2	30°C_48	0.0248	0.00746625	3.32161
	10°C	144	58	0.851	0.8372	0.8843	0.8433	3	0.822359	30°C	72	3	30°C_72	0.0389667	0.00708244	5.50187	0.00685584	0.000221416
	10°C	144	59	0.837	0.824	0.8702	0.8303	3	0.810056	30°C	72	3	30°C_72	0.0233	0.00664	3.50904
	10°C	144	60	0.8458	0.829	0.886	0.8396	3	0.817789	30°C	72	3	30°C_72	0.0346667	0.00684507	5.06447
19.02.2019 -Day 25 - Tissue collecting	20°C	168	64	0.844	0.8291	0.9155	0.8394	1	0.816207	30°C	84	3.5	30°C_84	0.0313667	0.00770973	4.06845	0.00770973	0.000579923
	20°C	168	65	0.8453	0.8281	0.8727	0.8376	1	0.81735	30°C	84	3.5	30°C_84	0.0162333	0.007638	2.12534
	20°C	168	66	0.8388	0.84	0.8918	0.827	1	0.811637	30°C	84	3.5	30°C_84	0.0327667	0.0086764	3.77653
	30°C	168	67	0.8528	0.836	0.9769	0.8502	3	0.823941	30°C	144	6	30°C_144	0.0440667	0.0087592	5.0309	0.0087592	7.5117e-05
	30°C	168	68	0.8669	0.8515	1.0921	0.8681	3	0.836332	30°C	144	6	30°C_144	0.0336667	0.0086976	3.8708
	30°C	168	69	0.8624	0.8428	0.9862	0.8533	3	0.832377	30°C	144	6	30°C_144	0.0484	0.00860973	5.62154
	10°C	168	70	0.8532	0.837	0.89	0.8415	3	0.824292	30°C	168	7	30°C_168	0.0413667	0.00875312	4.72593	0.00875312	0.00180764
	10°C	168	71	0.8584	0.8427	0.9175	0.8493	3	0.828862	30°C	168	7	30°C_168	0.0750667	0.0105894	7.08883
	10°C	168	72	0.8734	0.8565	0.9313	0.8633	3	0.842044	30°C	168	7	30°C_168	0.0412667	0.00697429	5.91697

## Sheet: 1B (Calibration_graph)
Table S1B. Calibration curve used in Table S1A.
Sample Number	Bag FW (g)	Bag DW (g)
73	0.904	0.8591
74	0.899	0.8566
75	0.89	0.8522
76	0.8673	0.8229
77	0.8974	0.8548
78	0.8888	0.8442
79	0.8864	0.8467
80	0.9126	0.8693
81	0.907	0.8671
82	0.9124	0.8729
83	0.8633	0.8244
84	0.903	0.8597
85	0.8906	0.8474
86	0.9066	0.8676
87	0.8836	0.8427
88	0.8865	0.8488
89	0.866	0.8286
90	0.8474	0.8144
91	0.8755	0.8409
92	0.8843	0.8469
93	0.851	0.8185
94	0.8437	0.8174
95	0.8592	0.8254
96	0.8669	0.8374
97	0.8717	0.8389
98	0.8855	0.8484
99	0.8689	0.8355
100	0.8546	0.8215
101	0.8625	0.8324
102	0.877	0.8461
103	0.882	0.8531
104	0.8708	0.8412
105	0.8722	0.8403
106	0.89	0.8588
107	0.8809	0.85
108	0.8781	0.8461
109	0.8896	0.856
110	0.8837	0.8518
111	0.8804	0.8456
112	0.8641	0.8303
113	0.8602	0.8303
114	0.8522	0.817
115	0.909	0.8747
116	0.87	0.8361
117	0.8734	0.8429
118	0.8696	0.8358
119	0.8631	0.8308
120	0.8678	0.8357
121	0.8588	0.8283
122	0.8574	0.8269
123	0.8573	0.8252
124	0.8564	0.8267
125	0.8508	0.8216
126	0.8608	0.8339
127	0.8663	0.8381
128	0.8852	0.8522
129	0.8835	0.8465
130	0.8837	0.8493
131	0.8732	0.8366
132	0.8732
133	0.8693
134	0.8578	0.8256
135	0.8678	0.8341
136	0.8806	0.8438
137	0.8759	0.844
138	0.8858	0.8509
139	0.9039	0.8687
140	0.9007	0.87
141	0.8911	0.8564
142	0.8971	0.8605
143	0.8872	0.8533
144	0.8811	0.8459
145	0.8808	0.8457
146	0.8746	0.8397
147	0.8822	0.8489
148	0.8789	0.8491
149	0.8683	0.833
150	0.8665	0.8333
151	0.8603	0.8305
152	0.866	0.8294
153	0.8594	0.8467
154	0.8624	0.8514
155	0.8795	0.8322
156	0.863	0.8333
157	0.8809	0.8499
158	0.8712	0.8428
159	0.8765	0.8492
160	0.8648	0.8318
161	0.8676	0.835
162	0.8914	0.8623
163	0.8752	0.84225
164	0.8693	0.8368
165	0.888	0.8571
166	0.8579	0.8255
167	0.8735	0.8434
168	0.8779	0.8466
169	0.8638	0.8332
170	0.8686	0.8354
171	0.8831	0.8515
172	0.8631	0.832
173	0.8963	0.8681
174	0.8863	0.859
175	0.8656	0.8373
176	0.8812	0.853
177	0.8487	0.822
178	0.8647	0.8363
179	0.8756	0.8474
180	0.8567	0.8283
181	0.865	0.8373
182	0.882	0.853
183	0.8554	0.8278
184	0.8796	0.8516
185	0.8719	0.8438
186	0.8749	0.8466
187	0.8961	0.8678
188	0.8934	0.8664
189	0.8853	0.8569
190	0.8992	0.8685
191	0.8856	0.855
192	0.8712	0.8406
193	0.8938	0.8621
194	0.8756	0.8511
195	0.8906	0.8695
196	0.8906	0.8611
197	0.8787	0.8567
198	0.89	0.864
199	0.8788	0.8597
200	0.8711	0.8422
201	0.8712	0.8421
202	0.8823	0.8596
203	0.8658	0.8381
204	0.8643	0.8347
205	0.8831	0.8529
206	0.87	0.8405
207	0.8734	0.8435
208	0.8911	0.8606
209	0.8737	0.8443
210	0.8709	0.8413
211	0.889	0.8593
212	0.8779	0.8478
213	0.8711	0.8417
214	0.8643	0.8351
215	0.8758	0.8452
216	0.8668	0.8366
217	0.8686	0.8385
218	0.8668	0.8362
219	0.8845	0.8557
220	0.892	0.8609
221	0.9019	0.8715
222	0.8915	0.8604
223	0.8941	0.8629
224	0.8831	0.8532
225	0.8744	0.8443
226	0.8679	0.8386
227	0.8923	0.8631

## Sheet: 1C (Correction factor)
Table S1C. Control of weighing fluctuations during the days of the experiment using fixed metal objects as constants. Although there are some weights that reach beyond the 95% confidence intervals, none of the daily measurements is statistically significant. This implies that a correction factor was not necessary to systematically normalize all the measurements from one day.
Correction Factor (Scale Calibration Kit)
Hs/Object	Blade	Pin +	Pin -	Tampolin mesh
T0 upstairs	1.9852	2.278	2.2763	3.3824	0.985775	0.999868	0.999561	0.996712	0.994221	0.998595	0.990073	0.997848
T0 downstairs	1.9764	2.2736	2.267	3.3725	0.985643	0.986212	0.982494	0.980023	0.987172	0.995692	0.987915
TF (Dry)	1.9854	2.2784	2.2759	3.3825	0.99943	0.996843	0.994352	0.998464	0.989941	0.997717
T_0	1.9846	2.2781	2.2764	3.3818	0.996273	0.993782	0.999034	0.990511	0.998287
T_48	1.9863	2.2817	2.2759	3.3855	0.997506	0.995306	0.986788	0.994559
T_72	1.984	2.285	2.2772	3.3889	0.992816	0.984309	0.992069
T_84	1.9848	2.2774	2.2759	3.3806	0.991474	0.999253
T_144	1.9772	2.272	2.2765	3.3736	0.992218
T_168	1.9844	2.2766	2.2765	3.3795
confidence interval	0.00384268	0.00407088	0.00329088	0.00546071							Min	0.980023
CI+	1.98699	2.28194	2.27858	3.38627
CI-	1.9793	2.2738	2.272	3.37535
Beyond confidence interval
