# Supplementary material for: Spatially Enriched Paralog Rearrangements Argue Functionally Diverse Ribosomes Arise during Cold Acclimation in Arabidopsis
Source: Int J Mol Sci. 2021 Jun 7;22(11):6160. doi: 10.3390/ijms22116160 (PMC8201131; doi:10.3390/ijms22116160)
Supplement: Supplementary file 1 [file ijms-22-06160-s001.zip › Table S2.xlsx]

## Sheet: 2A
Table S2A. Significantly changed probe hybridization of Arabidopsis thaliana Col-0 wild type cytosolic ribosomal proteins (RPs) after 1 and 7 days of cold acclimation. The first column shows the time at which the probe indicates differential expression (P-Value < 0.05),: 1D, at day 1 after shift to 10°C; 7D, at seven days after shift to 10°C; Intersection, at both time points. A concatenated vers…						WT	WT	WT	WT	WT	WT	WT	WT	WT	dko1	dko1	dko1	dko1	dko1	dko1	dko1	dko1	dko1	dko2	dko2	dko2	dko2	dko2	dko2	dko2	dko2	dko2
Cold response pattern	Gene_code	Probe_ID	Gene_name	Subunit	Microarray_Gene code and Probe_ID	0D	0D	0D	1D	1D	1D	7D	7D	7D	0D	0D	0D	1D	1D	1D	7D	7D	7D	0D	0D	0D	1D	1D	1D	7D	7D	7D
Intersection	AT1G15930	21610	eS12_RPS12A	40S	AT1G15930_21610	10.1967	10.2324	10.1715	10.1334	10.162	10.1608	10.289	10.3276	10.3079	10.3237	10.2997	10.2791	10.095	10.0746	10.0863	10.2369	10.1016	10.1387	10.3593	10.3595	10.2553	10.0796	10.0729	10.0798	10.1722	10.1542	10.227
Intersection	AT1G15930	42029	eS12_RPS12A	40S	AT1G15930_42029	11.0204	11.0021	11.0061	10.9795	10.8963	10.9653	11.1497	11.1442	11.099	11.1254	11.1162	11.0876	10.8757	10.9062	10.9123	11.0628	10.9133	10.9304	11.1498	11.1566	11.0604	10.9828	10.8535	10.8834	10.9772	10.9207	10.8796
Intersection	AT1G57860	27814	eL21_RPL21G	60S	AT1G57860_27814	11.4225	11.3736	11.3406	11.4453	11.4724	11.4669	11.5296	11.4707	11.4766	11.3949	11.4567	11.4677	11.4013	11.4065	11.3548	11.4003	11.4836	11.3961	11.5151	11.5404	11.5013	11.4829	11.4573	11.4361	11.388	11.3903	11.4643
Intersection	AT2G19740	22435	eL31_RPL31A	60S	AT2G19740_22435	10.2068	10.1205	10.0461	10.3894	10.2557	10.3672	10.4532	10.2259	10.3376	10.038	10.0579	10.2132	10.327	10.3026	10.3215	10.2239	10.2498	10.1967	10.2285	10.0423	9.97247	10.2259	10.2833	10.3468	10.2661	10.2469	10.2211
Intersection	AT2G32060	18855	eS12_RPS12C	40S	AT2G32060_18855	9.08516	9.03877	9.19371	9.28104	9.24296	9.19418	9.3103	9.23643	9.21926	9.1384	9.18665	9.08378	9.20722	9.20085	9.25741	9.2789	9.12239	9.135	9.08378	9.06903	9.15911	9.20529	9.21926	9.26533	9.12698	9.26214	9.10282
Intersection	AT2G36170	37846	eL40_RPL40A	60S	AT2G36170_37846	10.0494	10.0001	10.0301	10.1092	10.0827	10.1413	10.1611	10.0961	10.1292	10.0603	10.1297	10.1483	10.1132	10.0752	10.2098	10.2008	10.1635	10.102	10.0731	10.0147	10.0956	10.1148	10.1515	10.13	10.1415	10.0908	10.1148
Intersection	AT3G09630	11832	uL4_RPL4A	60S	AT3G09630_11832	5.52055	5.28595	5.29136	5.55545	5.47639	5.44224	5.68649	5.49365	5.63598	5.27074	5.42632	5.66113	5.47639	5.66906	5.28998	5.40648	5.55545	5.5256	5.44397	5.28092	5.28284	5.49365	5.40648	5.44397	5.47639	5.44224	5.49365
Intersection	AT3G13580	976	uL30_RPL7D	60S	AT3G13580_976	9.70481	9.73494	9.5535	9.48148	9.40621	9.60389	9.49205	9.6449	9.5455	9.78893	9.63924	9.7902	9.42469	9.4177	9.45184	9.37661	9.32251	9.25676	9.71673	9.76798	9.77873	9.50744	9.37661	9.33262	9.21813	9.18966	9.31221
Intersection	AT3G49910	24065	uL24_RPL26A	60S	AT3G49910_24065	12.1014	12.098	12.0952	12.0876	12.1062	12.1305	12.098	12.0928	12.1014	12.0876	12.098	12.0952	12.1062	11.3885	12.0928	12.1014	12.0876	12.098	12.0952	12.1062	12.1305	12.0928	12.1014	12.0952	12.1062	12.1305	12.0928
Intersection	AT3G49910	32004	uL24_RPL26A	60S	AT3G49910_32004	11.8684	11.798	11.8068	11.8671	11.8683	11.86	11.8775	11.8871	11.8684	11.8671	11.8775	11.8874	11.8683	12.002	11.7751	11.8684	11.8671	11.8775	11.8874	11.8683	11.86	11.8871	11.8684	11.8471	11.8683	11.86	11.8871
Intersection	AT4G14320	28943	eL42_RPL36aB	60S	AT4G14320_28943	8.8313	8.7439	8.77928	8.9921	8.93999	8.92692	8.90533	8.87155	8.94307	8.81289	8.88999	8.84985	9.01331	8.98266	8.86222	8.90799	8.9921	8.90533	8.95309	8.88907	8.7906	8.85289	8.86073	8.94378	8.91106	8.87797	8.97604
Intersection	AT4G18100	36446	eL32_RPL32A	60S	AT4G18100_36446	10.6225	10.5793	10.6018	10.7262	10.707	10.7209	10.7264	10.6889	10.7117	10.6348	10.7064	10.6959	10.712	10.7366	10.7068	10.7728	10.6888	10.734	10.7276	10.5514	10.5505	10.6944	10.7023	10.6409	10.7412	10.7013	10.7291
Intersection	AT5G23900	6923	eL13_RPL13D	60S	AT5G23900_6923	10.5273	10.5746	10.5064	10.3888	10.3669	10.3544	10.338	10.4665	10.4406	10.5943	10.4312	10.5689	10.2855	10.2807	10.2606	10.2419	10.2608	10.2006	10.5368	10.5972	10.6631	10.3431	10.2996	10.2337	10.2674	10.3389	10.453
Intersection	AT5G59850	7861	uS8_RPS15aF	40S	AT5G59850_7861	10.3561	10.3393	10.3998	10.4265	10.4537	10.3389	10.2725	10.249	10.2983	10.2909	10.2814	10.2951	10.4409	10.4253	10.4061	10.3561	10.4265	10.4489	10.2479	10.2382	10.3213	10.2826	10.2983	10.3918	10.3241	10.46	10.4426
Intersection	AT5G60670	9353	uL11_RPL12C	60S	AT5G60670_9353	8.77787	8.79049	8.70076	8.90048	8.88334	8.96692	8.86597	8.95565	8.99158	8.74173	8.7416	8.77712	8.85953	8.81209	8.71599	8.89839	8.72845	8.71369	8.93609	8.94633	8.82961	8.85705	8.75824	8.77712	8.82801	8.82085	8.93581
1D	AT1G04480	16075	uL14_RPL23A	60S	AT1G04480_16075	9.47387	9.4587	9.46358	9.51511	9.43026	9.54698	9.47635	9.52613	9.45701	9.43547	9.48412	9.49342	9.43909	9.40973	9.41089	9.44109	9.52546	9.49039	9.586	9.60792	9.48863	9.41731	9.47387	9.45348	9.43026	9.47519	9.46796
1D	AT1G07070	19064	eL33_RPL35aA	60S	AT1G07070_19064	7.85166	7.62493	7.69193	7.95929	7.96315	7.9444	7.90579	7.847	7.75727	7.6173	7.64427	7.57597	7.78999	7.81794	7.51329	7.58063	7.72912	7.84918	7.64044	7.56079	7.57221	7.8669	7.85166	7.92071	7.78999	7.8587	7.8669
1D	AT1G18540	3258	eL6_RPL6A	60S	AT1G18540_3258	9.36778	9.31944	9.33431	9.40111	9.32218	9.38146	9.26597	9.32903	9.44415	9.2613	9.25511	9.35784	9.43783	9.42085	9.49016	9.34807	9.34988	9.36908	9.31504	9.24702	9.28049	9.31304	9.23103	9.25011	9.32218	9.30476	9.29138
1D	AT2G27710	25131	P1/P2_RPP2B	60S	AT2G27710_25131	4.98513	4.51065	4.64667	4.96184	4.87184	4.74328	4.51065	4.81938	4.67977	4.33426	4.77727	4.32068	4.87184	4.89518	4.81938	4.81656	4.81059	4.77727	4.47649	4.30937	4.3056	4.62279	4.45607	4.87005	4.72692	4.74328	4.62279
1D	AT2G32060	2865	eS12_RPS12C	40S	AT2G32060_2865	9.69245	9.64381	9.739	9.79366	9.79938	9.73398	9.7585	9.6853	9.66506	9.64549	9.7585	9.57998	9.76416	9.74663	9.75293	9.75235	9.68207	9.6719	9.62298	9.58472	9.62073	9.84251	9.8317	9.84071	9.76858	9.80942	9.63828
1D	AT2G32060	21344	eS12_RPS12C	40S	AT2G32060_21344	9.80391	9.72265	9.78203	9.89042	9.80599	9.87088	9.88022	9.77082	9.75965	9.70002	9.82789	9.66595	9.8185	9.87088	9.96712	9.81324	9.85612	9.80759	9.8153	9.80599	9.79183	9.73129	9.92413	9.91449	9.85803	9.68026	9.82981
1D	AT2G39390	33512	uL29_RPL35B	60S	AT2G39390_33512	9.03422	9.07331	9.05521	9.08767	9.15755	9.06916	9.06738	9.014	9.05984	9.1081	9.22698	9.11275	9.11865	9.11987	9.10437	9.12902	9.16743	9.16072	9.15937	9.18745	9.21372	9.19433	9.24277	9.17656	9.14829	9.18024	9.17983
1D	AT3G04920	25705	eS24_RPS24A	40S	AT3G04920_25705	10.035	10.1619	10.1825	9.97122	10.0165	10.0383	10.1104	10.1562	10.1219	10.1077	10.136	10.0979	10.0884	10.0886	9.97616	10.1008	10.208	10.1008	10.1407	10.1882	10.2698	10.0803	10.1329	10.0668	10.0378	10.0414	10.1768
1D	AT3G10610	5695	eS17_RPS17C	40S	AT3G10610_5695	8.86194	8.9156	8.93968	9.04026	9.03586	8.81961	8.78183	8.83731	8.83534	8.7494	8.81783	8.77615	8.82381	9.00372	8.90006	8.81292	8.88749	9.09141	8.8273	8.82381	8.85809	8.92666	9.04614	9.05564	8.82381	8.96149	8.97151
1D	AT3G16080	30887	eL37_RPL37C	60S	AT3G16080_30887	10.6309	10.6582	10.7199	10.8279	10.7651	10.7693	10.6719	10.5594	10.6207	10.4932	10.6536	10.5889	10.825	10.1814	10.8263	10.6484	10.6881	10.7762	10.5988	10.6693	10.7098	10.6761	10.8845	10.8466	10.6693	10.7363	10.7604
1D	AT3G58700	43044	uL5_RPL11B	60S	AT3G58700_43044	9.17645	9.08901	9.12533	9.16485	9.17065	9.21797	9.17831	9.15926	9.16313	9.17641	9.12871	9.1989	9.09909	9.16717	9.10255	9.13204	9.03427	9.04919	9.09746	9.08063	9.01747	9.04884	8.97873	8.98498	9.03052	9.06294	9.04884
1D	AT3G62870	37827	eL8_RPL7aB	60S	AT3G62870_37827	9.32154	9.22593	9.22354	9.30012	9.24953	9.26682	9.30636	9.35147	9.33353	9.31084	9.21322	9.37666	9.33893	9.36062	9.26801	9.2254	9.1784	9.22593	9.32439	9.27762	9.23702	9.1541	9.13707	9.13326	9.14073	9.18338	9.16808
1D	AT4G18100	18430	eL32_RPL32A	60S	AT4G18100_18430	8.59519	8.39593	8.46264	8.59269	8.59787	8.63354	8.67382	8.64613	8.57135	8.51117	8.60097	8.53849	8.6304	8.66208	8.60445	8.77231	8.7293	8.71458	8.55195	8.43147	8.46521	8.67155	8.70961	8.69898	8.74782	8.75837	8.64613
1D	AT4G39200	26682	eS25_RPS25E	40S	AT4G39200_26682	11.754	11.8057	11.7217	11.601	11.6194	11.6293	11.6916	11.7572	11.7067	11.746	11.6162	11.7217	11.5886	11.6126	11.5967	11.6436	11.679	11.6162	11.6969	11.7161	11.6217	11.6206	11.5448	11.5496	11.6632	11.6588	11.6129
1D	AT5G02960	43588	uS12_RPS23B	40S	AT5G02960_43588	11.2501	11.2815	11.2724	11.1545	11.1946	11.1935	11.3235	11.2477	11.2215	11.2907	11.2672	11.2876	11.1841	11.1935	11.2624	11.2501	11.2854	11.1975	11.2876	11.2777	11.2824	11.2968	11.243	11.1832	11.2777	11.2537	11.2148
1D	AT5G09510	28095	uS19_RPS15D	40S	AT5G09510_28095	8.15717	8.05452	7.98659	8.22009	8.13745	8.06426	8.21795	8.04986	8.17737	7.89338	7.93922	8.04636	8.04624	8.21008	8.10605	7.92473	8.08711	7.93922	7.98659	7.93231	7.90227	8.00307	7.99919	8.09621	8.08768	8.10589	8.10605
1D	AT5G16130	1844	eS7_RPS7C	40S	AT5G16130_1844	8.86655	8.7725	8.88242	8.86294	8.85005	8.89842	8.93867	8.91345	8.87848	8.76506	8.74234	8.70223	8.8595	8.81607	8.82005	8.80685	8.76506	8.76128	8.72521	8.70384	8.68845	8.84922	8.69583	8.75043	8.8333	8.80272	8.72867
1D	AT5G48760	6069	uL13_RPL13aD	60S	AT5G48760_6069	8.52203	8.51611	8.51736	8.5512	8.49221	8.55007	8.54281	8.53478	8.50541	8.48406	8.51611	8.54707	8.49221	8.52309	8.45748	8.39442	8.57984	8.51611	8.54707	8.52218	8.45543	8.40408	8.55451	8.51736	8.49221	8.55007	8.55961
1D	AT5G58420	34267	eS4_RPS4D	40S	AT5G58420_34267	7.89908	7.85144	7.90737	7.86354	7.80857	7.89187	7.9106	7.90237	7.92178	7.69525	7.75017	7.87092	7.9144	7.91129	7.77092	7.87638	7.86354	7.72587	7.74154	7.75067	7.76616	7.59127	7.68952	7.65118	7.75067	7.79511	7.84729
1D	AT5G59850	3838	uS8_RPS15aF	40S	AT5G59850_3838	9.17296	9.17031	9.20889	9.1726	9.18297	9.14902	9.06913	9.06913	9.1586	9.077	8.9971	9.12405	9.23787	9.20504	9.2256	9.1586	9.1831	9.19828	9.03883	9.00155	9.05826	9.06913	9.02722	9.02494	9.09182	9.09755	9.10155
7D	AT1G01100	3179	P1/P2_RPP1A	60S	AT1G01100_3179	11.121	11.0862	11.1153	11.1035	11.1022	11.0973	11.1568	11.1913	11.2749	11.2215	11.2047	11.0847	11.051	11.0513	11.1545	11.1325	11.1035	11.1405	11.182	11.2286	11.1778	11.1545	11.121	11.1711	11.1136	11.0973	11.1017
7D	AT1G01100	41721	P1/P2_RPP1A	60S	AT1G01100_41721	10.7152	10.7056	10.7964	10.6968	10.7196	10.752	10.8053	10.8649	10.9232	10.8121	10.8492	10.83	10.6964	10.694	10.8305	10.8357	10.7975	10.8053	10.8425	10.8165	10.8042	10.7941	10.7953	10.7267	10.8654	10.752	10.8305
7D	AT1G57660	14698	eL21_RPL21E	60S	AT1G57660_14698	11.6447	11.6356	11.6679	11.6646	11.7528	11.7382	11.7771	11.7581	11.6966	11.7578	11.6957	11.7119	11.6706	11.644	11.6504	11.7277	11.6646	11.6589	11.7728	11.7369	11.7697	11.7581	11.753	11.7119	11.693	11.7382	11.7243
7D	AT1G57860	32009	eL21_RPL21G	60S	AT1G57860_32009	9.58321	9.5777	9.56377	9.62968	9.74023	9.74298	9.69919	9.677	9.80629	9.61289	9.68218	9.638	9.62091	9.54126	9.64127	9.71564	9.6897	9.61046	9.76635	9.80783	9.74298	9.79223	9.71564	9.68736	9.69456	9.69281	9.71783
7D	AT1G59359	2067	uS5_RPS2B	40S	AT1G59359_2067	11.5811	11.672	11.686	11.5847	11.5593	11.5631	11.5248	11.5376	11.6015	11.6958	11.6997	11.6635	11.709	11.7048	11.8015	11.6596	11.6797	11.7346	11.6635	11.6127	11.7339	11.6445	11.7348	11.6482	11.709	11.7048	11.6793
7D	AT1G59359	8242	uS5_RPS2B	40S	AT1G59359_8242	11.2836	11.3437	11.3629	11.2715	11.2021	11.2888	11.1578	11.2103	11.206	11.307	11.3437	11.3095	11.4205	11.3481	11.4499	11.3419	11.307	11.299	11.3629	11.2929	11.3654	11.2279	11.3648	11.2435	11.3191	11.3822	11.3441
7D	AT1G70600	16128	uL15_RPL27aC	60S	AT1G70600_16128	11.5496	11.5938	11.5697	11.5057	11.5899	11.5529	11.4733	11.5069	11.4733	11.6327	11.5686	11.5526	11.5397	11.5529	11.604	11.5758	11.5293	11.541	11.5366	11.5397	11.5346	11.5632	11.5073	11.5203	11.4579	11.5058	11.4537
7D	AT1G79075	12979	eL41_RPL41B	60S	AT1G79075_12979	3.57399	3.71205	3.77857	3.54045	3.86507	3.66217	3.43704	3.60734	3.50472	3.46061	3.36813	3.42029	3.6645	3.58713	3.6945	3.50472	3.84575	3.7838	3.629	3.47769	3.23648	3.29906	3.66167	3.48294	3.6645	3.58713	3.60734
7D	AT2G04390	17044	eS17_RPS17A	40S	AT2G04390_17044	11.0953	11.1537	11.1927	11.0712	11.1064	11.0374	10.9699	11.05	11.0087	11.0848	11.1087	11.0549	11.1657	11.0269	11.0204	10.96	11.025	11.0425	11.0029	10.975	11.1732	11.0984	11.0863	11.0461	11.0689	11.0934	11.0984
7D	AT2G05220	835	eS17_RPS17B	40S	AT2G05220_835	9.96952	10.0861	10.0691	9.90129	9.91384	9.90942	9.86783	9.88371	9.8176	10.0512	9.97075	9.98931	9.96052	9.97924	10.0397	9.9131	9.90129	9.8902	9.89773	9.94288	9.95782	9.90768	9.85988	9.86536	9.89641	9.82558	9.88371
7D	AT2G05220	5161	eS17_RPS17B	40S	AT2G05220_5161	9.96215	9.99785	10.0013	9.90731	9.92546	9.80349	9.76318	9.81857	9.79317	9.99426	9.92081	9.89461	9.95757	9.93554	9.90095	9.83691	9.83366	9.80461	9.88979	9.93965	9.9696	9.93863	9.85256	9.82328	9.77857	9.85098	9.90095
7D	AT2G05220	10601	eS17_RPS17B	40S	AT2G05220_10601	10.9209	11.0279	10.8631	10.8178	10.7982	10.8144	10.75	10.7421	10.7599	10.9199	10.8612	10.9362	10.7831	10.7369	10.889	10.7366	10.7933	10.8089	10.8999	10.9338	10.9727	10.7825	10.7704	10.7212	10.7831	10.8144	10.8164
7D	AT2G05220	26199	eS17_RPS17B	40S	AT2G05220_26199	10.879	10.901	10.9319	10.8952	10.8621	10.8138	10.7352	10.8169	10.7872	10.7977	10.8881	10.8905	10.8563	10.8258	10.7707	10.7497	10.8046	10.7843	10.7939	10.897	10.9384	10.8417	10.8169	10.7784	10.7766	10.8138	10.8878
7D	AT2G17360	4692	eS4_RPS4A	40S	AT2G17360_4692	9.5007	9.40832	9.37704	9.46653	9.42939	9.58951	9.58781	9.57787	9.6101	9.45378	9.37588	9.56177	9.48385	9.48651	9.48149	9.61577	9.53834	9.46958	9.54857	9.55198	9.44357	9.55388	9.42058	9.40486	9.45727	9.41409	9.43717
7D	AT2G19750	3475	eS30_RPS30A	40S	AT2G19750_3475	9.75024	9.79169	9.75843	9.75945	9.72176	9.55533	9.55321	9.62373	9.54055	9.7256	9.72387	9.75394	9.74818	9.81266	9.79257	9.57744	9.59473	9.63285	9.56726	9.67751	9.71225	9.69221	9.76978	9.70262	9.62265	9.61085	9.63466
7D	AT2G21580	27470	eS25_RPS25B	40S	AT2G21580_27470	11.092	10.9621	10.9717	11.1638	11.1018	11.1543	11.2457	11.0605	11.1327	11.025	11.0707	11.13	11.0816	11.1234	11.1269	11.1854	11.0788	11.0707	11.1146	11.117	10.9577	11.1145	11.0647	11.1146	11.117	11.1019	11.0988
7D	AT2G25210	8656	eL39_RPL39A	60S	AT2G25210_8656	11.5075	11.4851	11.446	11.4612	11.4012	11.4409	11.42	11.4824	11.3419	11.4905	11.5288	11.4091	11.4723	11.4654	11.4392	11.4494	11.4482	11.4001	11.5225	11.4858	11.4826	11.4302	11.4233	11.5348	11.4582	11.3414	11.4117
7D	AT2G27720	8321	P1/P2_RPP2A	60S	AT2G27720_8321	9.0272	8.87977	8.90245	9.00241	8.92748	9.0673	9.07547	9.12386	9.09277	8.90708	8.99296	8.95872	8.97899	8.91534	8.85438	8.95723	9.01928	8.94824	8.89387	8.84395	8.93919	8.95707	8.88002	9.0729	9.06144	8.91534	9.04581
7D	AT2G32220	44656	eL27_RPL27A	60S	AT2G32220_44656	8.11534	8.11289	8.07339	8.08647	8.04758	8.05568	8.09254	8.03865	8.2055	8.16251	8.07219	8.07339	8.08562	8.15724	8.44389	8.11534	8.08647	8.11289	8.25477	8.31483	8.10182	8.08646	8.11534	8.22638	8.04758	8.10182	8.03865
7D	AT2G34480	1781	eL20_RPL18aB	60S	AT2G34480_1781	10.8486	10.8102	10.7379	10.8001	10.7658	10.7023	10.7205	10.7523	10.7536	10.7733	10.8102	10.8544	10.7142	10.8529	10.8471	10.7869	10.835	10.8705	10.8587	10.8596	10.7814	10.7414	10.7103	10.7932	10.7762	10.8573	10.7329
7D	AT2G36160	12220	uS11_RPS14A	40S	AT2G36160_12220	7.37358	7.39295	7.26216	7.47275	7.5285	7.40386	7.5257	7.58572	7.52529	7.26906	7.34228	7.26216	7.28358	7.45176	7.3151	7.45662	7.34718	7.34228	7.33288	7.3501	7.27033	7.35498	7.3278	7.40002	7.44093	7.45176	7.45946
7D	AT2G43460	39623	eL38_RPL38A	60S	AT2G43460_39623	9.162	9.18599	9.20175	9.09016	9.13208	9.01644	9.03533	9.09987	9.0236	9.20977	9.20579	9.08873	9.10046	9.10251	9.04894	9.0558	9.10816	9.07391	9.184	9.215	9.24177	9.19139	9.149	9.10413	9.06323	9.07345	9.09987
7D	AT2G44120	18739	uL30_RPL7C	60S	AT2G44120_18739	9.63139	9.55074	9.60413	9.60345	9.60773	9.57874	9.71099	9.71631	9.751	9.58707	9.6686	9.63838	9.67658	9.65954	9.52313	9.62007	9.58707	9.46128	9.58896	9.50022	9.57874	9.60354	9.45326	9.55591	9.55474	9.50057	9.47251
7D	AT2G47610	30142	eL8_RPL7aA	60S	AT2G47610_30142	10.1428	10.0496	10.1029	10.1499	10.0667	10.1467	10.088	10.0659	10.0441	10.0119	10.0393	10.0565	10.0849	10.0291	9.96573	9.96363	9.97585	9.94031	10.0362	10.105	10.049	10.0068	9.96876	9.96092	9.9681	9.9608	10.0273
7D	AT3G02080	16508	eS19_RPS19A	40S	AT3G02080_16508	10.2516	10.1364	10.1998	10.3123	10.1773	10.2715	10.4294	10.4358	10.406	10.2106	10.2155	10.3115	10.1921	10.102	10.1113	10.3182	10.2478	10.2547	10.4104	10.3172	10.2076	10.2301	10.115	10.1564	10.2446	10.2425	10.1589
7D	AT3G02190	12503	eL39_RPL39B	60S	AT3G02190_12503	8.26603	8.20573	8.23417	8.11119	8.11473	8.21889	8.2764	8.20571	8.27702	8.31425	8.20573	8.38446	8.23062	8.21889	8.15118	8.19678	8.2531	8.24705	8.21435	8.16286	8.18734	8.20571	8.08343	8.18646	8.16286	8.07364	8.15118
7D	AT3G04230	27313	uS9_RPS16B	40S	AT3G04230_27313	7.69389	7.87763	7.92108	7.58988	7.7002	7.78251	7.49975	7.54624	7.61831	8.03825	7.92276	8.03263	7.76282	7.67004	7.86624	7.85509	7.81957	7.92276	7.78381	7.88428	7.9593	7.80871	7.80508	7.65498	7.49216	7.55171	7.80871
7D	AT3G06700	14247	eL29_RPL29A	60S	AT3G06700_14247	11.1632	11.1216	11.1357	11.0599	11.0618	11.1051	11.0414	11.0491	11.0154	11.1095	11.0242	11.1357	11.0487	11.2305	11.0912	11.0691	11.1878	11.2598	11.0781	11.1353	11.0221	11.1719	11.1632	11.1113	11.2725	11.1934	11.109
7D	AT3G06700	43967	eL29_RPL29A	60S	AT3G06700_43967	11.4048	11.4094	11.37	11.3668	11.4045	11.3079	11.2721	11.2888	11.2784	11.3668	11.4094	11.4006	11.3387	11.4272	11.435	11.3813	11.4538	11.4781	11.2901	11.3185	11.356	11.4275	11.444	11.4857	11.5181	11.4853	11.4489
7D	AT3G08520	42103	eL41_RPL41D	60S	AT3G08520_42103	10.0138	10.0609	10.1108	10.1434	10.2001	10.1538	10.2369	10.2147	10.1754	10.0177	10.0254	10.0865	10.0426	10.1057	10.1819	10.3039	10.1727	10.2203	10.0865	10.1332	10.2446	10.2227	10.3174	10.2787	10.2947	10.2807	10.2307
7D	AT3G09200	44892	uL10_RPP0B	60S	AT3G09200_44892	8.93201	8.93427	9.04378	8.95407	9.12593	9.06182	8.99999	9.10477	9.15834	9.10475	8.9792	8.99946	9.17224	9.18394	9.0548	9.18186	9.03759	9.07581	8.94905	8.8968	8.99042	9.07838	9.09547	8.94905	9.20457	9.22525	9.24848
7D	AT3G09680	3339	uS12_RPS23A	40S	AT3G09680_3339	4.99905	4.98117	4.91442	4.78523	5.03541	5.16282	4.42178	4.36748	4.38237	4.97424	5.15879	4.43412	5.20189	4.98152	5.45392	5.15039	5.38339	5.4524	5.51355	5.53869	5.37766	5.28607	5.59359	5.57241	4.81536	5.16282	5.14441
7D	AT3G16780	23066	eL19_RPL19B	60S	AT3G16780_23066	9.65997	9.63747	9.64527	9.48187	9.6149	9.70391	9.53406	9.44065	9.4298	9.55239	9.51784	9.52541	9.70862	9.49708	9.64975	9.53507	9.6581	9.61875	9.48185	9.5016	9.51509	9.52749	9.58202	9.60166	9.55701	9.58227	9.59058
7D	AT3G28500	1995	P1/P2_RPP2C	60S	AT3G28500_1995	7.22996	6.36122	7.60756	6.25444	6.22634	6.66631	6.06002	6.04428	6.27689	7.53057	7.79461	7.50756	7.47618	7.36401	7.87887	8.18182	7.09937	7.09489	6.94693	7.11912	6.66631	7.373	6.62514	6.38384	7.62611	7.64932	6.53119
7D	AT3G44590	31586	P1/P2_RPP2D	60S	AT3G44590_31586	7.93281	7.94496	7.9903	7.80415	7.88868	7.8094	7.77812	7.89113	7.709	7.91287	8.01142	7.72867	7.73928	7.8094	7.65851	7.76509	7.91287	7.73807	7.93371	7.98111	7.99681	7.89113	7.85183	7.85534	7.84472	7.757	7.79496
7D	AT3G49910	5409	uL24_RPL26A	60S	AT3G49910_5409	11.3162	11.221	11.2802	11.2764	11.3376	11.3586	11.3638	11.3936	11.3745	11.344	11.3069	11.2802	11.3065	11.2283	11.2527	11.3679	11.344	11.3864	11.3707	11.3629	11.3334	11.2797	11.2603	11.3053	11.2325	11.3334	11.3202
7D	AT3G49910	9384	uL24_RPL26A	60S	AT3G49910_9384	11.4957	11.5165	11.5424	11.5261	11.5135	11.5099	11.6203	11.5616	11.6717	11.5334	11.6395	11.6113	11.4955	11.4717	11.5897	11.6717	11.5923	11.4839	11.6284	11.6321	11.6338	11.5061	11.5717	11.4748	11.6134	11.657	11.6079
7D	AT3G53740	13161	eL36_RPL36B	60S	AT3G53740_13161	8.2496	8.22308	8.2928	8.20913	8.31969	8.36207	8.43569	8.45913	8.46389	8.3488	8.37069	8.2928	8.27025	8.36207	8.26972	8.39712	8.445	8.40566	8.47412	8.48976	8.53405	8.5559	8.48371	8.45001	8.39958	8.36207	8.34594
7D	AT3G53890	42890	eS21_RPS21B	40S	AT3G53890_42890	10.0147	9.94933	9.92733	9.89905	9.87991	9.84747	9.88838	9.82281	9.7773	9.9396	9.90315	9.8682	9.9235	9.91773	9.86286	9.91142	9.99591	10.0207	9.88691	9.88849	9.94694	10.0614	10.0432	10.0881	10.0468	10.0183	9.94888
7D	AT3G59540	2580	eL38_RPL38B	60S	AT3G59540_2580	10.7403	10.6188	10.6284	10.7248	10.635	10.7905	10.8791	10.7905	10.7991	10.6441	10.698	10.7365	10.6894	10.6375	10.6473	10.7871	10.8179	10.8134	10.6832	10.6993	10.619	10.6917	10.5612	10.7188	10.7615	10.8024	10.7142
7D	AT4G25890	16389	P1/P2_RPP3A	60S	AT4G25890_16389	10.1898	10.4141	10.4873	10.1493	10.4455	10.0467	9.96689	10.1174	10.0628	10.3755	10.2483	10.177	10.2935	10.3399	10.1857	10.0221	10.2971	10.3414	10.0198	10.075	10.4945	10.3781	10.4802	10.4284	10.1075	10.2352	10.3177
7D	AT4G29390	12769	eS30_RPS30B	40S	AT4G29390_12769	10.1365	10.1282	10.1581	10.0246	10.0495	9.99962	9.97331	10.0389	10.0178	10.169	10.1248	10.143	10.1388	10.1658	10.1146	10.0351	10.1157	10.1316	10.0616	10.0093	10.0577	9.97532	10.0541	10.0335	10.1557	10.1042	10.151
7D	AT4G30800	30172	uS17_RPS11B	40S	AT4G30800_30172	8.71216	8.84996	8.82915	8.72207	8.65376	8.64528	8.48278	8.41599	8.42346	8.59503	8.6283	8.41543	8.8025	8.76526	8.73009	8.49416	8.66102	8.6549	8.60823	8.65376	8.68399	8.61307	8.73746	8.76657	8.54925	8.57729	8.61307
7D	AT4G33865	29657	uS14_RPS29C	40S	AT4G33865_29657	10.467	10.5149	10.4817	10.4508	10.4719	10.471	10.5965	10.5632	10.5709	10.5534	10.483	10.6197	10.5189	10.5671	10.5213	10.6135	10.678	10.6773	10.5519	10.6421	10.6512	10.7223	10.7335	10.703	10.6807	10.6584	10.6138
7D	AT5G02610	13391	uL29_RPL35D	60S	AT5G02610_13391	8.43423	8.54163	8.36225	8.38697	8.30133	8.32404	8.38907	8.26381	8.43423	8.38697	8.31538	8.4437	8.18774	8.29646	8.48756	8.33292	8.29953	8.2043	8.59266	8.66789	8.5842	8.47144	8.33292	8.15225	8.35256	8.20959	8.21083
7D	AT5G02870	13112	uL4_RPL4D	60S	AT5G02870_13112	11.099	11.1233	11.1829	11.1846	11.053	11.0968	11.0475	11.0254	11.057	11.0817	11.1598	11.1698	11.177	11.1861	11.1858	11.1108	11.1125	11.1078	11.0794	11.0869	11.1106	11.1002	11.1859	11.1411	11.1591	11.1401	11.1538
7D	AT5G02870	13894	uL4_RPL4D	60S	AT5G02870_13894	11.0505	11.0355	11.0874	10.9641	10.9564	10.8789	10.9022	10.8295	10.858	11.0234	11.0217	11.0058	11.1106	11.0704	11.0999	10.9948	11.0101	11.0088	10.8974	10.8913	11.0704	10.9814	11.015	10.9619	10.985	11.0098	10.9938
7D	AT5G04800	44396	eS17_RPS17D	40S	AT5G04800_44396	10.1803	10.1941	10.121	10.1514	10.1677	10.0845	10.0796	10.0469	10.0493	10.1786	10.1812	10.1985	10.1166	10.1485	10.2026	10.0741	10.0813	10.0938	10.1372	10.1677	10.1432	10.1313	10.1587	10.1398	10.1247	10.1378	10.1386
7D	AT5G15200	19543	uS4_RPS9B	40S	AT5G15200_19543	5.91634	6.02307	5.95871	5.88126	5.82588	5.63695	5.59987	5.72217	5.79978	5.72332	5.83899	5.95871	5.74329	5.84749	5.88307	5.79978	5.98526	5.94998	5.8397	5.82588	5.76841	5.64913	5.61644	5.58331	5.606	5.63695	5.7952
7D	AT5G16130	12967	eS7_RPS7C	40S	AT5G16130_12967	11.0242	10.9914	10.9871	11.0501	10.9728	11.0009	10.9357	10.9144	10.9141	10.8852	10.8337	10.8789	10.8774	10.8866	10.949	10.8561	10.9153	10.9176	10.9055	11.0282	10.9705	10.9098	10.9237	10.8948	10.9145	10.9318	10.8795
7D	AT5G18380	18550	uS9_RPS16C	40S	AT5G18380_18550	11.4649	11.4475	11.5208	11.5631	11.4533	11.5136	11.5524	11.6088	11.6005	11.4963	11.4662	11.6042	11.4284	11.363	11.3712	11.4649	11.374	11.5217	11.488	11.4775	11.4614	11.5422	11.4649	11.398	11.5277	11.4892	11.5018
7D	AT5G22440	30308	uL1_RPL10aC	60S	AT5G22440_30308	8.86093	8.66991	8.84069	8.78311	8.79496	8.76078	8.69123	8.69429	8.60233	8.58211	8.7433	8.64519	8.67605	8.26415	8.40061	8.56432	8.67953	8.57356	8.53965	8.60234	8.66017	8.54603	8.41495	8.5669	8.63764	8.70227	8.73291
7D	AT5G27770	13217	eL22_RPL22C	60S	AT5G27770_13217	9.08578	9.04555	9.04321	9.17917	9.09506	9.05185	9.21232	9.14808	9.26237	9.11192	9.11196	9.19268	9.18183	9.01516	9.09604	9.1791	9.03981	9.05784	9.06326	9.1262	9.17537	9.23747	9.12178	9.11785	9.24438	9.19541	9.14808
7D	AT5G28060	3693	eS24_RPS24B	40S	AT5G28060_3693	9.59632	9.57699	9.58313	9.67519	9.68457	9.63791	9.77129	9.81649	9.82257	9.57386	9.59368	9.63651	9.5311	9.59258	9.47625	9.59632	9.62331	9.55437	9.70468	9.68457	9.73509	9.58834	9.60754	9.54753	9.5234	9.52423	9.63151
7D	AT5G40040	24618	P1/P2_RPP2E	60S	AT5G40040_24618	3.69844	2.85035	3.07476	3.27273	3.43405	3.13432	2.43163	2.25583	2.0685	1.84235	2.04509	2.56641	2.73079	3.02107	3.41433	2.92645	3.05548	3.34273	3.07476	2.53918	2.4819	3.27088	3.14665	2.9502	3.16946	3.33165	2.86197
7D	AT5G45775	13443	uL5_RPL11D	60S	AT5G45775_13443	2.28335	1.89979	1.8793	1.92744	1.78164	1.28786	1.0481	1.10924	0.99828	0.888406	1.38022	0.838798	0.8926	1.91796	0.789431	1.50075	1.16211	0.821867	1.33527	1.02703	1.28786	1.25633	1.1062	1.33527	1.41352	1.05398	2.00874
7D	AT5G61170	13610	eS19_RPS19C	40S	AT5G61170_13610	10.6051	10.5831	10.6378	10.6513	10.6021	10.5962	10.4596	10.4577	10.4714	10.5652	10.6114	10.485	10.5652	10.6397	10.5939	10.5537	10.5146	10.6488	10.533	10.5652	10.475	10.5844	10.5769	10.616	10.5071	10.5786	10.567
7D	AT5G61170	28718	eS19_RPS19C	40S	AT5G61170_28718	10.7304	10.7365	10.6779	10.7133	10.6556	10.6474	10.6176	10.6241	10.5856	10.6955	10.6449	10.6779	10.7131	10.7408	10.6877	10.6392	10.6003	10.6513	10.6587	10.6862	10.5885	10.6539	10.5974	10.6779	10.6297	10.6222	10.5681
7D	AT5G62300	36576	uS10_RPS20C	40S	AT5G62300_36576	10.9604	10.9463	11.0143	10.9753	10.9567	11.0008	11.0622	11.034	11.0366	10.9317	10.9338	10.9815	10.9468	10.9481	10.9802	11.026	10.9951	10.9688	10.934	10.8837	10.8898	10.9389	10.8999	10.9132	11.0068	10.9898	10.9389
7D	AT5G67510	19783	uL24_RPL26B	60S	AT5G67510_19783	9.30134	9.47677	9.35258	9.23297	9.35082	9.19149	9.15229	9.18504	9.13291	9.46431	9.33745	9.35258	9.25102	9.30094	9.36978	9.33935	9.28951	9.32182	9.39836	9.50755	9.44429	9.34816	9.39554	9.4138	9.19064	9.34453	9.36978

## Sheet: 2B
Table S2B. Significantly changed probe hybridization of Arabidopsis thaliana Col-0 wild type ribosome associated protein (RAPs) after 1 and 7 days of cold acclimation. The first column shows the time at which the probe indicates differential expression (P-Value < 0.05): 1D, at day 1 after shift to 10°C; 7D, at seven days after shift to 10°C; Intersection, at both time points. A concatenated versi…		WT	WT	WT	WT	WT	WT	WT	WT	WT	dko1	dko1	dko1	dko1	dko1	dko1	dko1	dko1	dko1	dko2	dko2	dko2	dko2	dko2	dko2	dko2	dko2	dko2
Cold response pattern	Microarray_Gene_Probe_IDs	0D	0D	0D	1D	1D	1D	7D	7D	7D	0D	0D	0D	1D	1D	1D	7D	7D	7D	0D	0D	0D	1D	1D	1D	7D	7D	7D
Intersection	AT5G42220_530	8.76078	8.88128	8.77257	8.59944	8.59385	8.69771	8.47412	8.71169	8.80979	8.87159	8.72368	8.91805	8.60762	8.62358	8.63256	8.71894	8.69066	8.71859	8.75476	8.85276	8.8817	8.65588	8.51665	8.52723	8.74132	8.5674	8.68768
Intersection	AT1G21740_575	6.82851	7.06405	7.09778	6.73391	6.97525	6.73554	6.6499	6.81848	6.44156	6.81473	6.85209	6.518	6.55874	6.47111	6.4722	6.58102	6.4994	6.4721	6.81612	7.05452	7.03437	6.5774	6.81563	6.56474	6.59665	6.65488	6.83667
Intersection	AT2G47330_779	7.39196	7.36433	7.29867	7.40066	7.28552	7.41577	7.30714	7.30986	7.48869	7.35763	7.33499	7.48096	7.49902	7.50441	7.5797	7.56675	7.48051	7.53019	7.35785	7.23446	7.28235	7.41453	7.3962	7.44929	7.49496	7.4223	7.40634
Intersection	AT3G13580_976	9.68029	9.6976	9.54342	9.54718	9.48252	9.60109	9.46993	9.57551	9.47332	9.68139	9.63123	9.67523	9.49424	9.47956	9.48987	9.43522	9.34946	9.32432	9.69938	9.74541	9.74837	9.49722	9.46029	9.42911	9.26975	9.26873	9.36428
Intersection	AT3G52580_1060	5.49216	5.56872	5.60018	5.74311	5.88732	5.70829	5.74684	5.59991	5.53692	5.4907	5.78335	5.43711	5.97647	6.07361	5.97381	5.92945	5.76253	5.81875	5.65807	5.529	5.63804	5.88652	6.16887	6.07427	5.80892	5.8968	5.88059
Intersection	AT1G56080_1216	6.79812	6.82122	6.813	6.90524	6.89235	6.92692	7.02174	6.85095	7.00249	6.77191	6.84103	6.94859	6.91748	6.98993	7.0761	7.03714	6.98171	6.93831	6.82312	6.84925	6.79057	6.92788	6.87521	6.91642	7.12264	7.06064	6.88855
Intersection	AT4G34660_1540	7.86606	7.93905	7.8236	7.77561	7.76759	7.77027	7.8392	7.72161	7.74387	7.9075	7.79541	7.91945	7.81391	7.84421	7.71749	7.80785	7.80092	7.79133	7.90325	7.87694	7.96084	7.80954	7.74567	7.70324	7.69146	7.76849	7.85074
Intersection	AT3G60245_1802	10.6577	10.535	10.5683	10.6788	10.6543	10.7453	10.644	10.5713	10.5661	10.53	10.5552	10.5294	10.7779	10.7068	10.8277	10.7629	10.7178	10.8395	10.5058	10.4664	10.479	10.6208	10.6855	10.7662	10.675	10.6482	10.5938
Intersection	AT5G16130_1844	8.7638	8.71944	8.8179	8.88905	8.94748	8.91426	8.93958	8.83469	8.75812	8.6164	8.7488	8.50983	8.9373	8.91681	8.91236	8.9055	8.8005	8.77359	8.69788	8.67322	8.66915	8.78655	8.88461	8.88222	8.80141	8.82903	8.78655
Intersection	AT1G33330_1942	7.38991	7.44576	7.32911	7.17505	7.18411	7.22872	7.29652	7.3317	7.29792	7.5109	7.49231	7.43654	7.19746	7.22346	7.16864	7.34715	7.37653	7.23973	7.41446	7.48457	7.35213	7.37151	7.10136	7.16061	7.40276	7.31663	7.29497
Intersection	AT5G11780_2336	4.95114	5.23919	5.23076	4.85133	5.06432	4.80398	4.65984	4.78202	4.68763	5.00427	5.08277	4.90716	4.87681	4.94567	5.18351	4.90912	4.89019	4.87527	5.10116	5.22061	5.25003	4.75087	5.0141	4.83942	4.64697	4.75177	5.00718
Intersection	AT2G45810_2499	8.30531	7.97088	8.05267	8.29255	8.35206	8.29961	8.25019	8.40678	8.51783	8.06948	8.0454	8.06517	8.26533	8.35746	8.17525	8.24035	8.42691	8.52823	8.08251	7.93157	7.87655	8.29124	8.18517	8.39685	8.44957	8.37577	8.37827
Intersection	AT1G18540_3258	9.30955	9.22469	9.27642	9.42547	9.39682	9.37484	9.24198	9.30181	9.38699	9.15496	9.28379	9.1667	9.50618	9.48001	9.54342	9.40657	9.36763	9.40977	9.28443	9.2388	9.23247	9.31964	9.32965	9.39665	9.33552	9.37247	9.31291
Intersection	AT1G53560_3259	7.57979	8.3514	8.23855	7.53583	7.19703	7.25837	7.65181	7.88792	8.10646	8.48433	8.43253	8.42568	7.70417	7.53758	7.91543	7.8963	7.62688	7.51573	7.93673	8.2233	8.4101	7.66145	7.4161	7.36782	7.86125	7.72722	7.32291
Intersection	AT3G11510_3927	10.4677	10.3793	10.3501	10.4829	10.4047	10.4413	10.4166	10.4431	10.4438	10.3457	10.3115	10.4101	10.4592	10.4653	10.5182	10.5065	10.4276	10.4629	10.3223	10.2897	10.3203	10.4022	10.3425	10.4709	10.4312	10.3474	10.3474
Intersection	AT5G15260_4313	5.14022	5.67115	5.58403	4.9258	4.96471	4.90971	4.93557	5.33274	5.35152	5.64329	5.57034	5.64844	5.09506	4.90971	5.13222	5.20076	5.45978	5.32039	5.45431	5.66263	5.59397	5.24065	4.94762	4.91504	5.32147	5.3772	5.0433
Intersection	AT2G17360_4692	9.50204	9.39691	9.36364	9.53167	9.5134	9.58226	9.55733	9.55994	9.55953	9.3549	9.39262	9.40614	9.56763	9.5465	9.55378	9.66058	9.52604	9.47791	9.5164	9.50534	9.3986	9.53608	9.47029	9.48942	9.4932	9.48831	9.47357
Intersection	AT2G40780_4701	5.87799	5.80387	5.90232	6.23757	6.16863	6.10987	6.22319	6.0287	6.01676	5.79362	5.94966	5.88195	6.21949	6.20812	6.4394	6.24119	6.10347	6.20392	5.84793	5.8171	5.87295	6.05309	6.26304	6.352	6.09138	6.1584	6.0287
Intersection	AT5G27850_4710	10.0835	9.91374	9.97602	10.1526	10.0327	10.1345	10.121	10.0652	10.1664	9.97168	10.0686	9.96418	10.2003	10.1567	10.1575	10.1294	10.1658	10.1421	10.125	10.0892	9.93605	10.1229	10.1399	10.1515	10.127	10.1806	10.0742
Intersection	AT1G71900_4796	4.93481	4.71328	4.81714	4.99924	4.80303	4.87615	4.99301	4.78763	4.91757	4.70592	4.7202	4.73805	4.98783	5.06153	4.99785	4.85813	4.95008	4.95465	4.79902	4.75241	4.7571	4.85411	4.84397	4.97226	4.92976	4.97376	4.86718
Intersection	AT1G01500_4807	7.08439	6.97063	7.0137	7.253	7.17264	7.10746	7.33376	7.36804	7.31487	7.13189	7.09289	7.29458	7.3275	7.34926	7.24479	7.26011	7.45117	7.44873	7.00573	6.91108	7.07324	7.34991	7.37597	7.43317	7.34183	7.4454	7.30478
Intersection	AT5G22080_5073	8.48128	8.46048	8.43633	8.2557	8.28263	8.3129	8.46595	8.48665	8.35386	8.62882	8.59267	8.60345	8.22754	8.13296	8.16193	8.41757	8.44591	8.26453	8.53959	8.59324	8.50743	8.49486	8.21642	8.21587	8.39155	8.41437	8.41617
Intersection	AT5G15750_5676	8.26035	8.00525	8.11356	8.48214	8.36634	8.43444	8.52946	8.13789	8.21938	8.00118	8.1756	7.97818	8.5084	8.43668	8.54848	8.37036	8.22567	8.19999	8.19962	8.06167	7.97613	8.35717	8.56268	8.56358	8.21343	8.2174	8.27602
Intersection	AT1G25141_5858	3.95288	4.03157	4.5838	3.47001	4.01432	3.9494	4.5644	4.32615	4.54434	4.19661	3.6658	3.90173	3.62769	3.37587	3.07327	4.12451	4.42609	4.41679	3.72298	3.54013	3.97543	3.71648	3.52387	3.3665	4.36917	4.39297	4.50237
Intersection	AT5G53090_6246	7.52661	7.51825	7.48569	7.25924	7.42329	7.28363	7.23044	7.40046	7.31695	7.4332	7.36354	7.22933	7.19262	7.16572	7.24354	7.35653	7.27376	7.264	7.45112	7.54027	7.46754	7.29782	7.21992	7.28389	7.4079	7.38892	7.48251
Intersection	AT1G75200_6383	7.95869	7.69533	7.79405	8.1286	8.07281	8.17456	8.00448	7.86404	7.96591	7.66772	7.73183	7.75822	8.03894	8.02732	8.07971	8.00767	7.82714	7.84323	7.77993	7.73184	7.67044	7.89118	7.94237	8.00826	7.82997	7.85208	7.80401
Intersection	AT3G07910_6729	6.92043	6.89241	6.92377	7.17026	7.11614	7.1928	6.95203	6.94634	6.95604	6.87872	7.01306	6.9469	7.19831	7.18952	7.31138	7.14792	7.0296	7.08806	6.96682	6.88333	6.85976	7.15189	7.27026	7.2429	7.08658	7.02881	7.01086
Intersection	AT5G23900_6923	10.4985	10.5743	10.5055	10.3992	10.3857	10.3546	10.3194	10.4481	10.4257	10.57	10.4337	10.5296	10.284	10.2963	10.2753	10.2304	10.2688	10.2149	10.5296	10.5864	10.6512	10.3183	10.3574	10.2872	10.2727	10.3359	10.4594
Intersection	AT5G12110_7903	6.9265	8.10981	7.71168	7.1448	6.772	6.8072	6.84383	7.12081	7.03234	7.67002	7.64627	7.41685	6.772	7.01033	6.60981	6.75781	6.74408	6.70035	8.19585	8.37349	8.32318	7.1788	7.44432	6.82248	6.98973	6.95816	7.2199
Intersection	AT5G58370_8058	6.39359	6.36836	6.3369	6.71291	6.58356	6.76464	6.74736	6.4512	6.46952	6.36501	6.49144	6.30691	6.90901	6.89628	6.69397	6.63041	6.61412	6.53302	6.50245	6.34396	6.27054	6.47123	6.78967	6.83673	6.48324	6.55432	6.62456
Intersection	AT2G27720_8321	8.97362	8.82045	8.89211	9.0295	9.00294	9.05887	9.01514	9.1164	9.00596	8.81877	9.03664	8.77943	9.00013	8.97807	8.90762	9.03675	9.03278	9.02644	8.88206	8.82521	8.88703	8.8999	8.99206	9.13339	9.12102	8.99835	9.12124
Intersection	AT1G57540_9412	6.83687	6.87864	6.74445	6.60792	6.61256	6.61229	6.78861	6.79163	6.74751	6.95241	6.89443	6.86917	6.61888	6.51926	6.59274	6.91237	6.76315	6.6549	6.98373	6.98975	6.91689	6.78315	6.62054	6.67104	6.8296	6.83279	6.80463
Intersection	AT2G40780_9693	5.99578	5.81388	5.91203	6.23541	6.17457	6.19877	6.27352	5.9308	5.88911	5.82337	5.98461	5.94838	6.33454	6.26125	6.35518	6.25413	6.15249	6.24389	5.87902	5.7451	5.85628	6.06549	6.32302	6.43127	6.15555	6.12457	6.13859
Intersection	AT5G16240_9708	6.90522	6.86015	6.94701	7.07667	7.01382	6.98895	7.02494	6.97181	6.94605	6.77277	6.81207	6.84963	7.04972	7.14995	6.85413	6.86275	6.9948	6.99764	6.8247	6.7059	6.76607	7.09739	7.12143	7.09585	6.85155	6.87339	6.9498
Intersection	AT2G14910_9818	9.06726	9.11993	8.91804	8.76345	8.66697	8.81819	9.0019	9.2869	9.29992	9.57525	9.39375	9.6446	8.68538	8.57589	8.45418	8.916	8.97306	8.74022	9.36695	9.46481	9.48229	8.86915	8.47282	8.5431	8.98877	8.94265	8.96849
Intersection	AT1G34270_9845	4.22246	4.16554	4.22293	4.22347	4.20034	4.3009	4.33341	4.32514	4.22246	4.17919	4.16554	4.05737	4.16309	4.39794	4.28103	4.29858	4.32594	4.32003	4.17558	4.05274	4.16148	4.07552	4.20583	4.34411	4.30307	4.28799	4.28103
Intersection	AT1G72660_10265	4.6579	4.97946	4.69396	4.10025	3.93936	4.67616	4.88521	4.12267	3.99932	4.76808	4.48619	5.47566	4.35073	4.14156	5.01208	4.73659	4.48653	4.24538	5.08483	5.39221	5.35514	4.14723	4.1921	4.08772	4.23931	4.09695	4.38303
Intersection	AT1G01500_10355	7.39603	7.21766	7.31852	7.46004	7.32172	7.39364	7.69009	7.6536	7.38835	7.406	7.31793	7.4531	7.53679	7.67261	7.45183	7.45755	7.67635	7.64662	7.32805	7.12191	7.3905	7.47198	7.58295	7.75382	7.61501	7.57865	7.4883
Intersection	AT2G05220_10601	10.9115	11.0149	10.8628	10.8387	10.8185	10.7972	10.7537	10.7229	10.721	10.889	10.853	10.8978	10.794	10.7659	10.8863	10.7436	10.8065	10.841	10.8978	10.928	10.9684	10.7684	10.823	10.781	10.8006	10.8403	10.8401
Intersection	AT1G59725_10793	4.74063	5.16102	4.99072	4.62053	4.52318	4.49864	4.16471	4.54646	4.40008	4.95372	5.10366	4.5068	4.91742	4.48883	4.10669	3.69923	4.34475	4.20592	4.62968	4.72048	4.71566	4.64832	4.23913	4.22483	4.65078	4.69343	4.34391
Intersection	AT3G09630_11832	5.19988	4.99024	5.19659	5.52375	5.47196	5.34143	5.45636	5.31147	5.44662	5.10669	5.52985	5.26246	5.64734	5.89069	5.83407	5.72964	5.57397	5.57894	5.35013	5.166	5.32756	5.35014	5.8177	5.73061	5.64734	5.59484	5.56427
Intersection	AT2G36160_12220	7.25152	7.25523	7.22398	7.47146	7.50782	7.32767	7.46593	7.57471	7.3929	7.1787	7.37646	7.12099	7.42056	7.56252	7.4095	7.5448	7.34144	7.3817	7.30802	7.29627	7.31056	7.32807	7.60183	7.54946	7.55357	7.59009	7.552
Intersection	AT1G07940_12455	6.42183	6.34153	6.33932	6.51655	6.40426	6.2491	6.51185	6.3351	6.40709	6.37562	6.36803	6.35293	6.69644	6.75921	6.74326	6.68298	6.64199	6.76763	6.44012	6.39325	6.47086	6.6297	6.89344	6.82782	6.811	6.75921	6.70095
Intersection	AT3G17160_12897	8.63398	8.62737	8.6418	8.61956	8.77867	8.78727	8.76724	8.80707	8.56696	8.40896	8.41684	8.42668	8.50722	8.53581	8.43213	8.6809	8.73302	8.63496	8.43551	8.39877	8.40534	8.52128	8.56399	8.66557	8.58794	8.58026	8.70571
Intersection	AT2G14910_13051	7.40892	7.49249	7.21951	7.11838	7.06594	7.20662	7.34233	7.58196	7.57171	7.83325	7.7187	7.83272	7.0542	6.9989	6.88172	7.30166	7.33925	7.05076	7.67982	7.82138	7.84664	7.20584	6.81079	6.88151	7.33485	7.28171	7.27208
Intersection	AT1G65220_13148	7.21868	7.33805	7.23703	7.43562	7.50642	7.4921	7.58833	7.48943	7.34362	7.25668	7.19937	7.36219	7.40696	7.46423	7.12185	7.3618	7.43562	7.40041	7.2505	7.25452	7.25467	7.3716	7.44957	7.42538	7.21661	7.32803	7.41315
Intersection	AT5G27770_13217	9.03758	8.95535	9.02044	9.16452	9.12932	9.04001	9.19053	9.11283	9.1899	8.98782	9.10901	8.98268	9.19274	9.05053	9.17777	9.23468	9.09054	9.11106	9.04358	9.14544	9.15079	9.19981	9.24181	9.21301	9.27828	9.26893	9.20821
Intersection	AT1G08410_13410	7.25462	7.17114	7.11608	7.5008	7.4427	7.64162	7.63248	7.24647	7.32	7.10571	7.16501	7.29892	7.597	7.59322	7.58708	7.48321	7.39301	7.41883	7.40286	7.36361	7.11472	7.40341	7.62414	7.58817	7.21048	7.32743	7.36478
Intersection	AT4G27020_13840	6.8805	7.30876	7.29554	6.86736	6.78963	6.82893	6.88574	6.95889	6.82297	7.17994	6.89619	7.07703	6.86695	6.98007	6.81957	6.6772	6.88446	6.73867	6.91189	7.01788	7.3366	6.8505	6.86045	6.81008	6.72155	6.75947	6.87111
Intersection	AT5G47400_14679	5.77857	5.70392	5.65828	5.87184	5.83638	5.98082	5.92412	5.70945	5.71015	5.67016	5.61157	5.70942	5.81135	5.90936	5.70945	5.74489	5.85618	5.87356	5.68052	5.56586	5.61954	5.76876	5.87786	5.88261	5.76824	5.75831	5.887
Intersection	AT5G19485_14750	7.65663	7.66171	7.76275	7.79103	7.83329	7.93436	7.87273	7.70358	7.79802	7.71268	7.74442	7.79162	7.9636	7.86046	7.92675	7.84286	7.87796	7.88048	7.69321	7.74232	7.74632	7.87264	7.89861	7.83812	7.75274	7.82731	7.80196
Intersection	AT2G07718_14830	7.20526	7.75623	7.66714	6.93274	6.95474	6.64247	6.12719	6.43532	6.46382	7.55721	7.10403	7.14944	6.88802	6.75637	6.99351	6.21244	6.18448	6.49383	7.26319	7.58742	7.71162	7.02128	7.07327	6.44559	6.12194	6.29982	6.83545
Intersection	AT3G15460_15989	7.30378	7.22708	7.3834	7.65649	7.49468	7.55628	7.52703	7.17508	7.34167	7.10141	7.22708	7.10221	7.67727	7.70703	7.75494	7.57455	7.52887	7.67644	7.37221	7.39952	7.18248	7.40006	7.80869	7.78217	7.24875	7.39069	7.42423
Intersection	AT3G61111_16387	0.638336	0.958476	1.00414	0.961946	0.775763	0.755455	0.909507	0.419653	1.44643	0.873086	1.01793	0.967021	3.73319	3.50662	2.86727	2.27719	3.27797	3.1842	1.22398	0.765699	0.755455	2.66232	3.32232	3.54225	1.64835	2.34397	2.02085
Intersection	AT1G12650_16660	8.52888	8.3642	8.43619	8.64417	8.61197	8.81356	8.79647	8.52499	8.68165	8.43354	8.57683	8.55678	8.64592	8.5964	8.73128	8.7815	8.58563	8.59491	8.51933	8.49307	8.47433	8.60345	8.67013	8.68961	8.55235	8.51688	8.60345
Intersection	AT4G26190_17464	8.033	8.16808	8.11356	7.93897	8.06231	7.99906	8.01219	7.91791	7.99041	8.09153	8.00198	8.13065	8.0425	8.03597	8.04254	7.98302	7.91048	7.87131	8.07823	8.07358	8.10651	7.8174	7.88801	7.86216	7.77619	7.81931	8.0147
Intersection	AT5G20160_17534	9.07702	8.73933	8.8825	9.40873	9.13141	9.20986	9.18073	8.81423	8.91348	8.77958	8.95601	8.91694	9.37681	9.37271	9.499	9.10616	9.03206	9.2383	8.90755	8.66321	8.78428	9.20325	9.50994	9.53266	9.21721	9.19725	9.09128
Intersection	AT5G35530_17666	10.2408	10.2522	10.272	10.0524	10.2468	10.2831	10.1689	10.216	10.2073	10.4097	10.3344	10.3263	10.1324	10.0431	10.1587	10.3174	10.1358	10.0352	10.3903	10.2953	10.3876	10.1324	9.96646	10.0272	10.0145	10.117	10.1324
Intersection	AT5G61990_17742	6.30744	6.51003	6.43438	6.22413	6.4663	6.37523	6.12725	6.13211	6.1911	6.55506	6.43222	6.50008	6.40861	6.39269	6.47926	6.4426	6.29095	6.30073	6.4159	6.52536	6.40963	6.31722	6.25028	6.25777	6.05621	6.177	6.23175
Intersection	AT1G05320_17858	7.98824	8.34561	8.31656	7.89604	7.88504	7.67525	7.64725	8.08901	7.88608	8.3612	8.27938	8.2358	7.87956	8.02313	7.71894	7.7694	7.96268	7.89824	7.83183	8.08068	8.45578	7.97346	7.95323	7.92595	8.00121	7.92165	7.83364
Intersection	AT4G27280_17868	7.90636	8.54065	8.35703	8.81192	8.29977	8.11276	7.5012	7.71116	7.42205	7.93032	8.00876	8.55255	8.47485	8.57119	9.08836	7.47374	7.66656	7.84031	7.43818	7.92898	7.82979	8.16587	8.9879	8.48708	7.49496	7.34038	7.58824
Intersection	AT5G60390_17994	8.49005	8.37234	8.35902	8.55121	8.54528	8.38015	8.47379	8.52646	8.39418	8.38317	8.37551	8.33544	8.6517	8.78349	8.729	8.78303	8.55977	8.64916	8.40214	8.34713	8.32048	8.57985	8.62939	8.70497	8.61944	8.57646	8.40708
Intersection	AT1G74060_18230	10.6892	10.7742	10.7401	10.6208	10.6849	10.5922	10.5991	10.7085	10.6839	10.7615	10.7421	10.7508	10.6536	10.6591	10.6419	10.5606	10.6854	10.6203	10.7432	10.7524	10.7834	10.7171	10.6866	10.6782	10.6272	10.6183	10.6263
Intersection	AT3G08740_18246	7.56867	7.58095	7.30775	7.41148	7.39336	7.43682	7.33261	7.63341	7.5701	7.70433	7.70248	7.66764	7.48049	7.39921	7.28281	7.46463	7.36486	7.27694	7.64399	7.75711	7.69378	7.40721	7.29103	7.32277	7.22108	7.28025	7.31699
Intersection	AT4G18100_18430	8.49879	8.26314	8.4558	8.6317	8.6729	8.52572	8.61641	8.56135	8.46738	8.39073	8.61465	8.30166	8.72372	8.7378	8.73512	8.85547	8.7157	8.75679	8.52959	8.35129	8.50888	8.64297	8.84833	8.8286	8.77287	8.82912	8.71736
Intersection	AT2G32060_18855	9.0469	8.92951	9.1284	9.29494	9.32079	9.16844	9.27203	9.1788	9.13405	9.01607	9.20093	8.93972	9.24257	9.27203	9.33358	9.33516	9.14579	9.20416	9.07888	9.02952	9.1179	9.18138	9.3392	9.34579	9.16918	9.32688	9.15401
Intersection	AT2G14910_19038	9.01883	9.18062	9.00342	8.66485	8.75569	8.88073	8.88915	9.34031	9.34748	9.57343	9.48583	9.67681	8.64231	8.59055	8.48797	8.96255	9.06722	8.82658	9.36548	9.54496	9.50219	9.00681	8.52472	8.53104	9.03277	8.97319	8.95629
Intersection	AT1G07070_19064	7.78782	7.51823	7.66849	8.01836	8.07556	7.92507	7.81502	7.74281	7.53841	7.4296	7.68991	7.4188	7.88762	7.96222	7.81562	7.73227	7.77555	7.94237	7.5991	7.49169	7.45926	7.77698	8.10326	8.09096	7.85404	7.94087	7.89493
Intersection	AT1G53560_19336	3.63798	4.22504	4.1445	3.97463	3.57776	3.1031	3.69073	3.73188	4.03057	4.23862	4.32664	4.36899	3.78913	3.61923	4.10405	3.63798	3.43151	3.42182	3.87263	3.89853	4.22561	3.71162	3.65564	3.55138	3.81661	3.78288	3.35852
Intersection	AT4G39960_19390	7.94838	7.70784	7.7792	7.94568	7.92915	8.05	7.85152	7.96847	8.00183	7.76066	7.81661	7.87894	7.98416	7.94443	8.0697	7.98357	8.03069	8.01286	7.79409	7.73745	7.72347	7.75682	7.8033	7.92656	7.90059	7.89383	7.93565
Intersection	AT3G59670_20538	6.80721	6.60256	6.71379	6.99837	7.09226	7.00192	6.75724	6.77322	6.74874	6.52026	6.6599	6.54529	7.08621	7.22551	7.03239	6.75151	6.9713	6.9881	6.62297	6.43834	6.63971	6.76022	7.24836	7.20756	6.71285	6.81768	6.93694
Intersection	AT5G43640_21038	7.66088	7.73283	7.87736	7.95962	8.24485	8.3459	8.017	8.31821	8.33284	7.71749	8.00665	7.79849	8.32369	8.21558	8.42898	8.47689	7.86975	8.0317	7.93644	8.02652	8.07024	8.34522	8.44017	8.28486	8.39188	8.36379	8.37721
Intersection	AT1G09640_22191	10.6843	10.7338	10.7381	10.7288	10.5761	10.7616	10.6807	10.7821	10.8691	10.8046	10.7442	10.8618	10.608	10.6108	10.7821	10.6477	10.6024	10.5525	10.7721	10.8724	10.838	10.6653	10.6106	10.5991	10.6174	10.5328	10.5547
Intersection	AT3G09200_22362	11.5807	11.5082	11.582	11.6971	11.5712	11.6564	11.5737	11.7166	11.628	11.5666	11.7159	11.5465	11.7907	11.8284	11.7166	11.8432	11.6971	11.7058	11.5852	11.5605	11.5668	11.6077	11.6831	11.7435	11.7709	11.6205	11.7472
Intersection	AT2G19740_22435	10.1893	10.1118	10.0529	10.3809	10.2879	10.3796	10.4588	10.2358	10.3206	9.99715	10.0643	10.1462	10.3282	10.321	10.3264	10.2197	10.261	10.2032	10.2364	10.0295	9.96759	10.2262	10.3484	10.3636	10.2671	10.2485	10.2411
Intersection	AT3G12390_22518	9.83414	9.82598	9.79253	9.97556	9.92586	9.917	9.87393	9.89132	9.99609	9.75537	9.76587	9.85104	9.95757	9.93646	9.80581	9.79981	9.8915	9.85289	9.82585	9.73428	9.68406	9.92121	9.84218	9.87929	9.86369	9.91402	9.85921
Intersection	AT2G47790_22755	8.25519	8.23076	8.18893	8.38521	8.32652	8.43828	8.47953	8.38824	8.40083	8.21405	8.19926	8.24502	8.31087	8.35904	8.39222	8.5329	8.37213	8.42674	8.37889	8.45707	8.22705	8.36844	8.41242	8.4583	8.34564	8.40954	8.39795
Intersection	AT2G33845_23612	9.80929	10.0059	9.85105	9.78786	9.78824	9.745	9.68533	9.74327	9.87421	10.0843	9.94056	10.081	9.71876	9.83092	9.98486	9.73676	9.73875	9.81042	9.91814	9.9961	9.77493	9.87396	9.68612	9.66634	9.76053	9.78538	9.6486
Intersection	AT3G12965_24082	9.01904	8.92183	9.01394	8.97431	9.055	9.07161	9.06729	9.08146	9.10207	8.90424	9.0715	8.89861	9.06571	9.13608	9.13212	9.21329	9.30504	9.3584	8.93566	8.91938	8.84187	9.05042	9.20541	9.27723	9.38131	9.29609	9.30869
Intersection	AT2G07675_24219	9.04727	9.47057	9.36385	8.86034	8.91476	8.83355	8.69261	9.04436	8.95515	9.38196	9.08568	9.39113	9.30064	8.97103	9.08724	8.99039	9.0927	8.91818	9.06056	9.17399	9.21292	8.95282	8.89677	8.68638	8.94582	8.94733	8.99041
Intersection	AT5G63120_24908	8.44355	8.061	8.19038	8.55359	8.40191	8.58732	8.47644	8.25508	8.36027	8.06743	8.087	8.39029	8.58349	8.18617	8.73936	8.35784	8.38778	8.46277	8.07687	7.96076	8.02552	8.41178	8.44355	8.58175	8.36363	8.43896	8.30005
Intersection	AT4G26710_25078	8.1995	8.22343	8.14347	8.06201	7.90574	7.87604	8.04172	8.11802	7.99351	8.29761	8.35152	8.26977	7.99298	7.90535	7.97301	8.00082	7.97799	7.92392	8.24243	8.18883	8.3043	8.27922	8.0148	7.98916	8.30461	8.22334	7.97086
Intersection	AT3G12130_25201	8.0425	7.88501	7.90451	8.20947	7.94816	8.21507	8.44127	8.07714	8.31425	7.9691	8.02162	8.30633	8.18483	8.18259	8.30745	8.29193	8.09317	8.0832	8.094	7.97683	7.85854	8.17981	8.13932	8.23303	8.27666	8.15783	8.16856
Intersection	AT1G69610_25576	5.9783	5.77908	5.85105	5.99813	6.06563	5.82753	6.0806	5.91481	6.05341	5.89919	5.78426	6.13282	6.2079	6.22063	6.3791	5.8968	6.33712	6.3465	5.74048	5.56287	5.8594	5.96673	6.24198	6.27906	5.95484	5.9387	6.09458
Intersection	AT5G10630_26300	7.85324	7.71742	7.75048	7.79896	7.76787	7.90609	7.85817	7.77648	7.87147	7.7313	7.72547	7.80664	7.91848	7.89464	7.86668	7.81312	7.91014	7.88492	7.71029	7.6705	7.68484	7.81041	7.72364	7.84817	7.80075	7.7616	7.79856
Intersection	AT1G63410_26767	6.00835	5.67467	5.81968	6.34158	6.31459	6.2358	6.67968	6.64107	6.69259	6.13314	6.3628	6.22977	6.29013	6.5033	5.74721	6.21465	6.73567	6.52413	6.25812	5.83627	5.86851	6.42048	6.3112	6.46542	6.74006	6.66858	6.60391
Intersection	AT5G47400_26910	7.46795	7.35758	7.4239	7.58325	7.58892	7.65892	7.44034	7.47493	7.50463	7.3029	7.2926	7.37221	7.46275	7.35472	7.48084	7.47003	7.45001	7.45445	7.31438	7.26184	7.37766	7.43678	7.4721	7.57266	7.36712	7.40009	7.57939
Intersection	AT1G72730_27761	8.51921	8.2757	8.41699	8.60921	8.66653	8.60212	8.44153	8.54334	8.36814	8.10238	8.27349	8.0263	8.49554	8.38864	8.28268	8.4655	8.42947	8.42674	8.19929	8.11957	8.12652	8.44187	8.42471	8.56951	8.60007	8.60212	8.48311
Intersection	AT5G35930_27779	6.29684	6.30243	6.23784	6.14397	6.13596	6.19413	6.04977	6.21216	5.99987	6.34509	6.25116	6.25622	6.05547	6.05414	6.16862	6.09307	6.01856	6.01049	6.31698	6.37023	6.16972	6.00877	6.07014	5.95812	6.07731	6.11521	6.09685
Intersection	AT1G65010_27828	8.95371	9.15813	9.14176	8.51187	8.76993	8.51527	8.47584	8.78698	8.78693	8.93209	8.74489	8.57001	8.65199	8.67355	8.2389	8.42269	8.77088	8.73979	8.88808	9.04754	9.05997	8.76759	8.55276	8.55864	8.68738	8.70721	8.84913
Intersection	AT3G24730_28223	6.83263	7.10298	6.94616	6.7917	6.74616	6.87653	6.83789	6.86707	6.89625	7.05363	7.17737	7.20155	6.9109	6.856	7.05143	7.01384	7.04698	6.90505	7.08229	7.07339	7.19416	7.05651	7.01177	6.89887	6.96871	6.9078	6.78453
Intersection	AT2G46000_28765	7.05913	7.28435	7.34038	6.76013	7.1276	7.08062	6.82128	7.101	7.14977	7.19091	7.24703	7.06972	6.78901	6.78891	6.78283	6.95873	6.89371	6.83998	7.15082	7.32582	7.28364	7.10883	6.8095	6.75819	6.98895	6.97946	7.00606
Intersection	AT4G14320_28943	8.72617	8.67228	8.77211	8.99837	8.99582	8.94576	8.89911	8.76584	8.83097	8.67658	8.87929	8.68824	9.09449	9.05692	8.94524	8.99167	9.0202	8.96673	8.88996	8.8545	8.75623	8.81234	8.99504	9.06412	8.87485	8.93229	9.03332
Intersection	AT5G14610_28976	6.96833	7.40572	7.28887	6.74849	6.94904	6.8485	6.82332	7.00882	6.82913	7.052	6.80131	6.73863	6.56942	6.64732	6.41861	6.59681	6.86665	6.69619	7.03304	7.30323	7.41141	6.83983	7.04476	6.89611	6.77223	6.73135	7.01778
Intersection	AT3G60245_29698	10.6621	10.6814	10.7624	10.725	10.9147	10.9301	10.8203	10.8519	10.874	10.6782	10.7407	10.7158	10.9268	10.8975	10.9357	10.9116	10.8787	10.9612	10.6893	10.6887	10.6426	10.8404	10.9513	10.8892	10.8745	10.8842	10.9357
Intersection	AT3G56020_30086	11.1858	11.2216	11.1718	11.2146	11.294	11.1962	11.2864	11.2426	11.1949	11.1055	11.1048	11.0963	11.2624	11.2073	11.2039	11.3139	11.3698	11.2864	11.1781	11.1501	11.2525	11.3195	11.3362	11.3957	11.294	11.3075	11.2538
Intersection	AT1G07940_30788	7.10191	6.97252	6.9677	7.12407	7.02372	7.03858	7.26997	7.06684	7.06134	7.06439	7.08562	7.09135	7.22595	7.28992	7.12534	7.16968	7.27535	7.31376	7.14349	7.00501	6.98139	7.2825	7.40387	7.38052	7.38403	7.38824	7.23764
Intersection	AT1G08580_30937	8.3463	8.30762	8.30836	8.59481	8.54156	8.57097	8.47437	8.24615	8.23268	8.13763	8.20878	8.28941	8.67899	8.68721	8.76769	8.51264	8.51189	8.61646	8.40016	8.32159	8.2909	8.51405	8.77054	8.77117	8.36099	8.44718	8.44014
Intersection	AT4G11630_31071	6.80924	6.64303	6.66	6.87674	6.93442	6.88981	6.87805	6.97388	6.87178	6.75976	6.79156	6.71413	6.84018	6.84641	6.80208	6.85364	6.90228	6.81356	6.75811	6.65567	6.61689	6.8238	6.86179	6.8873	6.83602	6.84641	6.7873
Intersection	AT1G12530_31588	6.76064	6.87987	6.85818	6.72045	6.77055	6.6195	6.49053	6.80149	6.76776	6.88832	6.86807	6.78882	6.54172	6.57292	6.52198	6.60433	6.51629	6.53588	6.83413	6.92293	7.00543	6.83517	6.66371	6.58531	6.75065	6.74559	6.63182
Intersection	AT3G60245_31628	11.0379	10.9132	10.9675	11.0335	11.1297	11.0817	11.049	11.0851	11.0598	10.8982	10.9771	10.9675	11.081	11.0728	11.0979	11.0809	11.0577	11.1305	10.9236	10.9124	10.8709	10.9725	11.1075	11.087	11.1174	11.1264	11.0979
Intersection	AT1G57720_31790	11.3992	11.3	11.2939	11.3653	11.2644	11.3501	11.3397	11.4346	11.3779	11.3431	11.253	11.3907	11.2135	11.1885	11.2784	11.202	11.0867	11.1044	11.3123	11.3205	11.2505	11.1689	11.0324	11.1023	11.0476	11.1217	11.0743
Intersection	AT1G61640_33038	7.03646	6.91822	6.90277	7.28161	7.20574	7.24104	7.16703	6.87808	6.95046	6.87786	6.89481	7.01189	7.26064	7.32998	7.27001	7.21856	6.97759	7.18381	6.95635	6.77329	6.80211	7.15768	7.27243	7.31678	7.10005	7.06973	7.08709
Intersection	AT5G54940_33880	11.0562	11.0938	11.0545	10.9448	10.9165	10.9314	11.0938	10.9755	11.0988	11.3935	11.3242	11.4689	11.0278	11.0879	11.1654	11.0562	11.0341	10.7755	11.0615	11.0807	11.2399	11.04	10.658	10.7942	10.9412	10.8088	10.7641
Intersection	AT5G35680_34878	9.79748	9.73906	9.86142	9.94328	9.9121	9.86923	9.90733	9.76362	9.79144	9.77381	9.81418	10.0114	9.96409	10.0127	10.0736	9.93297	10.0548	10.025	9.75092	9.64118	9.82946	9.99029	10.0154	9.95196	9.89704	9.85397	9.79339
Intersection	AT4G34140_35214	6.7767	6.80905	6.94121	6.68334	6.82346	6.86574	7.03103	7.10329	7.07608	6.93429	6.83818	7.02949	6.77742	6.61843	6.73515	7.0647	7.02996	6.96332	6.8984	6.81873	6.8687	6.71454	6.6913	6.58344	7.05498	7.0497	7.0693
Intersection	AT5G58370_35269	6.75282	6.72607	6.71217	7.02057	7.02074	7.09688	7.13813	6.82674	6.87483	6.72217	6.75635	6.79313	7.18986	7.21714	7.10612	7.00503	7.04321	7.0091	6.80354	6.78037	6.64013	6.90341	7.16305	7.20936	6.79454	6.96813	6.95223
Intersection	AT3G11120_35758	9.97885	10.0727	10.0639	10.1453	10.2895	10.0777	10.0452	10.2515	10.1696	9.94713	10.0951	9.91358	10.2116	10.1006	10.1737	10.3362	10.2547	10.2665	10.0408	9.85967	10.1543	10.1777	10.366	10.3202	10.3224	10.3272	10.3343
Intersection	AT1G26850_35884	4.97624	4.89007	4.96435	5.00781	4.97298	5.00206	4.96922	5.13895	5.11044	4.77318	4.77874	4.82642	5.10503	5.25221	5.12908	5.04659	5.06844	4.96922	4.90529	4.78936	4.92244	4.91545	5.11044	4.91154	5.02165	5.02211	4.92922
Intersection	AT2G40780_36129	7.13303	7.00087	7.0317	7.30052	7.38193	7.32234	7.37478	7.13535	7.0625	7.03871	7.04446	7.06661	7.31117	7.02664	7.47896	7.312	7.23844	7.34201	7.0868	6.97518	6.97903	7.2228	7.4634	7.49318	7.13541	7.34171	7.17129
Intersection	AT1G29550_36247	5.37917	5.44968	5.55502	5.33572	5.32824	5.32375	5.38458	5.36045	5.44822	5.53776	5.50943	5.43867	5.28457	5.37825	5.40316	5.25534	5.25411	5.33114	5.45589	5.5356	5.53368	5.32584	5.25041	5.2718	5.24828	5.21776	5.28242
Intersection	AT5G20180_36352	9.35854	9.11301	9.17248	9.42312	9.39859	9.46945	9.42531	9.2369	9.29626	9.12012	9.24596	9.18989	9.38289	9.41444	9.39202	9.43657	9.47497	9.50478	9.26989	9.04254	9.10864	9.42015	9.40272	9.55006	9.46304	9.44718	9.40602
Intersection	AT4G18100_36446	10.6048	10.5761	10.6176	10.7257	10.7214	10.7085	10.721	10.6848	10.672	10.621	10.6919	10.6529	10.7339	10.7717	10.7543	10.7955	10.7086	10.7857	10.7069	10.5337	10.5407	10.6917	10.7623	10.6971	10.7649	10.7236	10.7642
Intersection	AT3G03560_37087	7.35062	7.25462	7.33728	7.48799	7.49545	7.45943	7.3349	7.30457	7.34393	7.19254	7.24096	7.43505	7.50715	7.52271	7.53614	7.42841	7.47806	7.52377	7.1756	7.11948	7.15738	7.52249	7.42381	7.45117	7.40091	7.44591	7.37379
Intersection	AT3G52440_37371	3.35551	3.6811	3.59611	2.86729	3.46451	3.08546	2.70175	3.50931	2.85449	3.41978	3.50444	3.16856	2.93889	2.51873	2.40826	2.6675	2.96	2.45128	3.20825	3.14377	3.59696	2.87902	3.32083	2.59813	2.88405	3.18937	3.08929
Intersection	AT1G72270_37533	3.02209	3.10456	3.45252	3.15474	3.19419	3.38389	2.93113	2.82018	2.96612	2.55761	3.29609	2.76939	3.56682	3.83367	3.57517	3.76671	4.07049	4.4261	3.11226	3.11574	2.77296	3.49441	3.81467	3.85162	4.05611	3.92487	3.73019
Intersection	AT1G77610_37715	7.94913	7.7447	7.88907	7.97519	7.98993	7.90777	7.87564	7.82364	7.87931	7.64628	7.65227	7.76024	7.96936	8.07809	8.01877	7.8247	8.0236	7.97567	7.64686	7.55627	7.7194	7.86359	7.9323	7.95533	7.81452	7.7834	7.92922
Intersection	AT2G36170_37846	10.0335	9.9659	10.023	10.1317	10.1063	10.1435	10.1547	10.0963	10.1068	10.0053	10.137	10.0621	10.1295	10.0865	10.2217	10.2045	10.1693	10.1161	10.0809	9.98929	10.0968	10.1187	10.1922	10.163	10.1522	10.1044	10.1356
Intersection	AT5G43710_37930	4.7452	4.75809	4.75602	4.66215	4.64169	4.62638	4.5843	4.64115	4.53001	4.66215	4.80544	4.59855	4.67168	4.72741	4.55502	4.53001	4.7048	4.54872	4.77999	4.75583	4.81097	4.67645	4.63148	4.49304	4.5614	4.64263	4.61693
Intersection	AT4G11120_37970	8.371	8.24153	8.3623	8.41449	8.45953	8.37469	8.26932	8.28335	8.29534	8.18951	8.25606	8.2347	8.44521	8.49798	8.57028	8.41211	8.44851	8.45475	8.26717	8.15477	8.24917	8.37044	8.45446	8.45642	8.43078	8.44004	8.42063
Intersection	AT1G70000_38044	7.03604	7.19307	7.10999	7.07216	6.93209	6.83635	6.78146	6.94319	6.94873	7.31731	7.26945	7.218	7.0575	6.94391	7.04097	6.83537	6.94549	6.95907	7.24137	7.33346	7.2955	7.10404	7.15998	6.9631	6.87673	6.9057	6.96214
Intersection	AT5G43710_38399	7.22809	7.31945	7.3089	7.06783	7.20621	7.10918	7.01799	7.12525	7.10196	7.2397	7.20789	7.14634	7.05936	7.11104	7.04027	7.08153	7.12147	7.13803	7.24368	7.2368	7.24975	7.18727	7.07732	7.01549	7.12688	7.13249	7.24001
Intersection	AT3G03670_38796	5.85032	3.44151	3.78925	6.1577	6.19088	6.26288	7.23257	6.333	6.4573	3.87569	4.61134	7.51288	6.10338	6.08838	6.6165	7.50327	7.29394	6.85046	4.98799	4.01466	3.35081	6.62893	6.58276	6.44118	7.93149	7.54844	6.13961
Intersection	AT1G70000_39089	7.21835	7.37807	7.34549	7.30207	7.17167	7.06731	7.00305	7.14175	7.20871	7.48764	7.49292	7.39539	7.26858	7.0825	7.16231	6.98012	7.08417	7.17661	7.39221	7.41651	7.49195	7.27387	7.32484	7.22562	7.04272	7.13919	7.23844
Intersection	AT1G52930_39247	8.74829	8.50322	8.6144	8.99652	9.01158	9.06694	8.96789	8.73414	8.74829	8.46125	8.6287	8.50386	8.92081	8.95642	9.09902	8.91259	8.72667	8.75165	8.63439	8.46074	8.5012	8.83177	9.0381	9.01543	8.73576	8.73798	8.74476
Intersection	AT2G31610_39328	7.30421	7.29372	7.48323	7.50509	7.45279	7.45642	7.55422	7.34008	7.46532	7.27966	7.48331	7.25793	7.51343	7.63961	7.76434	7.67676	7.51891	7.6091	7.44557	7.32637	7.36423	7.55543	7.71504	7.66664	7.7714	7.65609	7.61348
Intersection	AT5G02430_39439	6.35899	6.642	6.43986	5.92036	6.05281	5.94474	5.87517	5.99587	5.99745	6.48193	6.22637	6.38212	5.72102	5.87364	6.10458	6.01173	5.87352	5.87176	6.47121	6.68459	6.69833	5.94967	5.80616	5.78608	5.9322	5.84111	5.82206
Intersection	AT1G57720_39652	10.9599	11.0557	11.012	10.9794	10.9742	11.0244	10.9396	11.1136	11.089	11.068	10.9248	10.9846	10.8816	10.8023	10.946	10.9156	10.86	10.7746	10.9917	10.9829	10.9352	10.8979	10.7545	10.7956	10.7672	10.7802	10.8195
Intersection	AT2G36170_39714	10.074	9.9725	10.0343	10.1198	10.073	10.1035	10.1273	10.0596	10.0688	10.0553	10.1164	10.0616	10.147	10.0928	10.159	10.1394	10.157	10.1366	10.1118	10.0339	10.1063	10.1055	10.181	10.1511	10.1202	10.1511	10.1208
Intersection	AT4G02230_39943	10.1449	10.1705	10.1306	10.1239	10.0553	10.1654	9.99881	10.1976	10.2663	10.201	10.1149	10.2624	10.0915	9.99577	10.1425	10.074	10.0425	10.0714	10.1658	10.1494	10.2634	10.1312	9.98754	10.0005	9.99459	10.0288	9.96511
Intersection	AT4G26710_40148	9.38571	9.51004	9.38015	9.04607	8.95691	8.96025	9.01299	9.23629	9.15102	9.51656	9.40016	9.41317	8.93985	9.02631	8.87668	8.99646	9.04607	8.97626	9.32862	9.40926	9.41338	9.36071	8.9635	8.97942	9.34783	9.22973	9.03821
Intersection	AT1G80750_40169	9.49452	9.37114	9.40352	9.62733	9.52803	9.65764	9.71455	9.42471	9.46273	9.37794	9.44053	9.41759	9.65028	9.63692	9.72128	9.66949	9.52416	9.55065	9.50004	9.44836	9.34821	9.48994	9.60714	9.65029	9.52415	9.50229	9.48994
Intersection	AT5G20160_40468	8.19315	7.97546	8.07584	8.58535	8.39142	8.3898	8.25916	8.04326	8.09897	8.03818	8.23882	8.1222	8.73092	8.79341	8.76365	8.41935	8.38399	8.586	8.1936	7.99777	8.02531	8.39882	8.77827	8.8164	8.43409	8.47213	8.39653
Intersection	AT5G35930_41803	7.21575	7.15431	7.07719	6.93456	7.02147	6.97902	6.75616	6.99284	6.89439	7.23626	7.13615	7.13434	6.91794	6.87592	6.91403	6.88476	7.02755	7.06656	7.25116	7.19824	7.19128	6.88996	6.87556	6.91595	6.97125	6.98612	7.1187
Intersection	AT3G11510_41989	9.81074	9.59723	9.69923	9.87197	9.81718	9.82572	9.67289	9.77563	9.76923	9.66441	9.72986	9.6277	9.83762	9.81217	9.83191	9.89858	9.70114	9.84236	9.61119	9.61462	9.53959	9.73711	9.69973	9.8669	9.75035	9.76309	9.70594
Intersection	AT3G08520_42103	10.0013	10.046	10.1218	10.1685	10.2173	10.1496	10.2192	10.2459	10.165	9.94488	10.0334	9.99173	10.0387	10.1164	10.2013	10.2985	10.146	10.2367	10.0983	10.1264	10.2448	10.219	10.3665	10.2824	10.304	10.2853	10.2765
Intersection	AT1G28310_42339	4.65132	4.67191	4.70381	4.51777	4.52881	4.40691	4.15897	4.37015	4.39459	4.77497	4.70524	4.66681	4.55861	4.64117	4.539	4.24844	4.3875	4.49323	4.68579	4.76	4.62148	4.51883	4.37246	4.29939	4.46112	4.59307	4.34314
Intersection	AT5G14610_42409	5.55483	5.90987	5.88922	5.45695	5.55956	5.33264	5.28074	5.46548	5.36484	5.6499	5.57831	5.28023	5.10185	5.25884	4.97528	5.18282	5.24922	5.28074	5.58011	5.72442	5.92466	5.37747	5.50135	5.4781	5.3387	5.3773	5.55226
Intersection	AT1G61670_43269	8.49034	8.67613	8.66021	8.50401	8.46075	8.40847	8.41445	8.59922	8.5457	8.67012	8.46324	8.51017	8.44232	8.57499	8.39581	8.32919	8.44973	8.53859	8.62661	8.64947	8.61609	8.62431	8.43555	8.4307	8.43582	8.38033	8.50018
Intersection	AT4G11175_44292	5.83903	5.88659	5.88849	6.0056	6.07091	5.95884	6.03123	6.12053	6.22269	6.11764	6.10631	6.16168	6.15067	6.12692	6.25216	6.12618	6.13472	6.20935	6.04869	5.96838	6.0611	6.14851	6.09317	6.19112	6.15067	6.14538	6.0317
Intersection	AT3G20260_44405	7.44832	7.5861	7.52705	7.25918	7.41368	7.09843	7.04682	7.29574	6.92699	7.30378	7.36509	6.99336	7.01396	7.17748	6.81353	7.00957	7.05465	7.12889	7.37181	7.58839	7.53306	7.17624	7.29805	7.20774	7.0707	7.2133	7.32426
Intersection	AT4G28440_44657	8.86334	8.84928	8.89564	8.92962	8.95579	8.9605	8.81572	8.85876	8.87826	8.85244	8.81982	8.91861	8.981	8.98032	9.02316	8.99115	8.99896	9.09282	8.75889	8.73198	8.76965	8.91335	9.00818	9.03072	8.94626	8.96547	9.01519
Intersection	AT3G09200_44892	8.84943	8.8759	8.97233	9.03535	9.1633	9.03113	8.96068	9.09767	9.09108	8.95348	9.04454	8.81602	9.22476	9.25873	9.1381	9.24564	9.05905	9.12909	8.92654	8.85228	8.97658	9.07475	9.22001	9.08936	9.2555	9.28138	9.27753
Intersection	AT2G07696_44912	7.26866	7.39079	7.24867	7.00624	7.27955	7.21932	6.80964	6.9099	7.0181	7.28159	7.0533	7.1171	7.05063	6.9006	6.96748	7.07024	6.81597	7.02714	7.19057	7.25349	6.95763	7.08963	6.77474	6.68161	6.71906	6.68814	7.04033
Intersection	AT3G20260_45196	7.04161	7.22158	7.17254	6.94167	6.99699	6.89129	6.80005	6.92919	6.75445	6.96865	7.05171	6.70942	6.82127	6.91132	6.60825	6.70592	6.7648	6.7751	7.03649	7.29538	7.18266	6.83316	6.96398	6.82986	6.73876	6.81124	7.0649
Intersection	RPL34_616	10.9645	10.9277	10.9697	11.0999	11.1097	10.9889	10.9995	11.0442	11.0323	10.8583	10.9495	10.8478	11.0138	11.0577	10.8505	10.9645	11.042	11.0779	10.9175	10.8442	11.0081	11.0021	11.071	11.0917	11.073	11.0438	11.0525
Intersection	RPL24_8147	8.2236	8.33364	8.17045	8.08324	8.12475	8.09586	8.08569	8.46576	8.27324	8.50051	8.51989	8.44356	8.17965	8.17514	7.95862	8.07523	8.23027	8.20824	8.35111	8.48464	8.51254	8.23245	8.13388	8.16348	8.2488	8.17722	8.24464
Intersection	RPL21C_9280	6.79456	6.84452	6.78182	6.63546	6.72835	6.53147	6.51079	6.72489	6.65872	6.82944	6.83566	6.72074	6.74863	6.66086	6.35599	6.42416	6.70868	6.63922	6.7138	6.71354	6.78686	6.58123	6.47247	6.56568	6.49015	6.52234	6.58123
Intersection	PRPL11_16355	6.68656	7.01659	6.8573	6.63799	6.72765	6.49941	6.48954	6.83108	6.88734	7.03148	6.90925	6.94949	6.82767	6.74567	6.51507	6.43957	6.68858	6.61993	6.84274	6.97133	7.10327	6.71075	6.67556	6.64307	6.55362	6.64818	6.6549
Intersection	MRPL11_24352	9.10597	9.24725	9.14825	9.04979	9.08752	9.0419	9.11369	9.09737	9.0808	9.27804	9.32478	9.27199	9.1378	9.15838	9.18307	9.11198	9.0902	9.03397	9.35334	9.37178	9.35833	9.24513	9.26989	9.18906	9.14462	9.15068	9.20894
Intersection	RPL21C_25947	8.80772	9.01392	8.79818	8.71122	8.79379	8.56808	8.59067	8.84575	8.80772	8.98941	8.87594	8.92467	8.67427	8.68759	8.37402	8.39463	8.72963	8.78902	8.7772	8.92756	8.94869	8.71519	8.65077	8.69244	8.63086	8.69785	8.77957
Intersection	RPL12-A_30126	7.22259	7.33967	7.15982	7.16154	7.06774	6.90467	7.01475	7.25904	7.315	7.46881	7.43376	7.40145	7.35102	7.2488	7.13213	7.02595	7.18453	7.21856	7.30668	7.28635	7.36831	7.22811	7.05951	7.17001	7.17555	7.15483	7.06801
Intersection	PRPL11_30428	6.81122	7.04812	6.93401	6.76036	6.79367	6.57486	6.58247	6.87213	6.86261	7.02742	6.96491	7.01421	6.815	6.78925	6.7337	6.53564	6.8006	6.74942	6.91122	7.10007	7.12768	6.66689	6.73402	6.74294	6.60866	6.71629	6.69328
1D	AT3G09200_301	8.97055	8.73766	8.84938	9.01572	8.94143	8.88499	8.99198	8.95063	8.79707	8.84403	9.0387	8.75771	9.11491	9.20753	9.03627	9.09684	8.96261	9.03078	8.76869	8.66483	8.8089	8.90034	9.02979	9.13685	9.05956	8.9807	8.90413
1D	AT3G61520_1067	7.42451	7.3211	7.47232	7.55154	7.51612	7.63229	7.24003	7.26378	7.28923	7.19829	7.17562	7.12124	7.58456	7.55467	7.63498	7.4898	7.24603	7.37305	7.22896	7.22815	7.27414	7.33832	7.35412	7.43747	7.14351	7.17133	7.21085
1D	AT1G57610_1073	7.36119	7.33332	7.53385	7.4055	7.52974	7.45695	7.30208	7.36335	7.32005	7.3015	7.45626	7.19717	7.49325	7.5438	7.60236	7.38647	7.44964	7.45314	7.31216	7.34135	7.41215	7.4903	7.62888	7.52992	7.39649	7.3606	7.3596
1D	AT3G09720_1297	7.38067	7.20932	7.24725	7.54633	7.50282	7.66007	7.70301	7.2861	7.3465	7.15861	7.29397	7.1843	7.55127	7.54093	7.59545	7.54488	7.34309	7.38383	7.40272	7.31647	7.26926	7.29192	7.62911	7.58341	7.45213	7.32867	7.44281
1D	AT5G54870_1511	8.54497	8.86331	8.79749	8.38033	8.3151	8.22702	8.48748	8.50215	8.58624	8.83512	8.67181	8.79749	8.45426	8.47392	8.48298	8.42793	8.53083	8.16084	8.4932	8.5218	8.81635	8.60244	8.46778	8.41181	8.724	8.533	8.48838
1D	AT2G21300_1969	7.76601	7.97898	7.95829	7.60001	7.71172	7.69488	7.74153	7.75871	7.59963	7.73586	7.66225	7.45121	7.56443	7.61946	7.38741	7.59963	7.63456	7.59585	7.72494	7.83381	7.99475	7.72096	7.78295	7.68934	7.69025	7.61166	7.80528
1D	AT3G05560_2063	10.5845	10.5535	10.5982	10.6834	10.6218	10.617	10.6159	10.5526	10.5845	10.5112	10.544	10.4873	10.6409	10.6857	10.6904	10.5916	10.5746	10.6428	10.5162	10.5028	10.5503	10.5493	10.6355	10.6397	10.4835	10.5422	10.5244
1D	AT1G18700_2199	6.6576	6.59161	6.61992	6.56037	6.56427	6.64605	6.6391	6.61067	6.62703	6.68166	6.56597	6.7645	6.60416	6.67831	6.57948	6.68935	6.69372	6.61983	6.65271	6.69167	6.63495	6.62004	6.47017	6.51632	6.58378	6.52933	6.62669
1D	AT2G25355_2684	6.97233	7.01786	7.11881	7.30306	7.20395	7.34793	7.43275	6.89562	7.07401	6.92308	7.00293	6.86393	7.31926	7.25912	7.44242	7.27306	7.04926	7.07212	7.05761	7.02903	6.98669	7.11977	7.31757	7.34589	6.96972	7.0138	7.0685
1D	AT4G00810_2767	10.5905	10.6268	10.6663	10.6384	10.7508	10.6274	10.4993	10.6436	10.5252	10.5625	10.5924	10.5362	10.6946	10.6538	10.6109	10.6044	10.7374	10.812	10.5069	10.4932	10.5924	10.649	10.7998	10.8176	10.6441	10.8055	10.7308
1D	AT2G32060_2865	9.66391	9.5806	9.71977	9.80223	9.85355	9.72615	9.70412	9.66404	9.5808	9.52872	9.75348	9.45459	9.79163	9.7846	9.80083	9.8055	9.71062	9.7119	9.59865	9.55261	9.59659	9.80906	9.89886	9.88212	9.79527	9.87489	9.68398
1D	AT5G55290_2924	8.52386	8.50364	8.45655	8.27718	8.27052	8.19063	8.24567	8.39294	8.39126	8.57076	8.49216	8.46355	8.24459	8.24393	8.23181	8.16966	8.34196	8.36345	8.32803	8.36519	8.44357	8.51571	8.28859	8.28404	8.5089	8.35439	8.23181
1D	AT1G67660_3155	6.72541	6.66498	6.64697	6.78341	6.83146	6.81712	6.6849	6.77936	6.84042	6.68522	6.71407	6.76968	6.92563	6.8524	6.92434	6.86318	6.81526	6.86812	6.72109	6.71629	6.69652	6.82121	6.81862	6.8317	6.66209	6.70284	6.69786
1D	AT3G13120_3222	6.27445	6.4062	6.26268	6.28662	6.40275	6.11701	6.2226	6.46923	6.53437	6.66053	6.6613	6.65753	6.38268	6.38546	6.0129	6.17893	6.40233	6.4062	6.46272	6.54447	6.50267	6.37703	6.22883	6.27832	6.28955	6.45174	6.3638
1D	AT1G36240_3428	5.07099	5.41683	5.49252	5.5848	5.99664	6.13556	5.51843	6.31836	6.44393	5.30428	5.75918	5.54901	6.10579	6.12704	6.60112	6.49917	5.48115	5.67191	5.56953	6.04442	5.97661	6.41123	6.52708	5.85205	6.09653	6.12072	6.31505
1D	AT5G59850_3838	9.09461	9.06559	9.1403	9.18998	9.22304	9.09243	9.02168	9.02226	9.0566	8.96765	9.03589	8.93256	9.29316	9.2591	9.25652	9.23116	9.22128	9.26276	9.01645	8.96254	9.03633	9.03984	9.16604	9.17721	9.12987	9.19623	9.17504
1D	AT3G06680_3953	7.6751	7.59476	7.66242	7.78414	7.76744	7.48162	7.42068	7.45804	7.30382	7.57787	7.78661	7.43523	7.93637	8.0002	7.98052	7.80878	7.7253	7.99223	7.55105	7.51204	7.6807	7.76615	8.0873	8.1105	7.91125	7.92425	7.88157
1D	AT2G47610_4091	9.49246	9.45073	9.40216	9.53533	9.53202	9.44355	9.50737	9.51339	9.49882	9.39951	9.45733	9.38759	9.6188	9.5924	9.56266	9.58618	9.51251	9.49057	9.54983	9.48346	9.40136	9.46113	9.53807	9.4831	9.49878	9.52073	9.47042
1D	AT4G19860_4343	9.76684	9.86223	9.73175	9.42404	9.454	9.25752	9.50218	9.75687	9.72421	9.97973	9.74654	9.95567	9.39009	9.35784	9.12824	9.45125	9.70738	9.61749	9.61799	9.51724	9.84293	9.68459	9.16708	9.35851	9.76338	9.70224	9.64079
1D	AT3G12915_4370	4.42546	4.25862	4.45551	4.62098	4.48556	4.56901	4.68011	4.43093	4.50296	4.28735	4.46322	4.51139	4.46019	4.46075	5.09472	4.69445	4.86373	4.95979	4.60476	4.66665	4.61159	4.51754	5.04934	4.99153	4.75711	4.64907	4.92596
1D	AT1G74270_4514	10.4319	10.4564	10.2872	10.3338	10.3606	10.3147	10.2886	10.3917	10.3808	10.4998	10.4279	10.4622	10.2782	10.3147	10.3203	10.2646	10.3785	10.388	10.5351	10.5199	10.4174	10.5055	10.302	10.3251	10.4077	10.4103	10.2727
1D	AT2G18400_4527	8.54312	8.53148	8.50036	8.38233	8.52336	8.34267	8.25932	8.49378	8.38612	8.41752	8.45766	8.20284	8.31934	8.23405	8.32904	8.33958	8.39492	8.41148	8.46713	8.5145	8.47142	8.34876	8.31206	8.37016	8.37555	8.4429	8.35972
1D	AT5G60390_4544	10.7764	10.7626	10.8119	10.8646	10.8082	10.8023	10.7521	10.8007	10.8454	10.7542	10.6957	10.7986	10.928	10.9728	10.9497	10.796	10.8049	10.8041	10.7623	10.7182	10.8328	10.881	10.9234	10.8383	10.8484	10.8846	10.7713
1D	AT5G59850_4669	9.35389	9.37741	9.47596	9.53225	9.57419	9.37339	9.25996	9.27041	9.39244	9.23204	9.40936	9.24389	9.60928	9.55858	9.58454	9.52282	9.49107	9.56844	9.31979	9.30079	9.33396	9.43849	9.47972	9.49837	9.4677	9.61841	9.48159
1D	AT5G54200_4688	7.36474	7.34852	7.30818	7.13245	7.28371	7.11527	7.12819	7.27731	7.22838	7.16589	7.08779	7.01653	7.06437	7.106	6.83496	7.18292	7.22491	7.09899	7.14556	7.22363	7.17334	7.21675	6.97673	7.03981	7.20366	7.24679	7.21935
1D	AT5G51400_4893	9.02073	8.92265	8.95437	8.80811	8.90085	8.78986	8.87404	9.11004	9.15322	9.09047	9.09198	9.11568	8.8474	8.77432	8.6422	8.84872	9.00624	8.94912	8.86327	8.89245	8.98065	9.084	8.82363	8.84861	9.06807	9.11684	9.00911
1D	AT4G39200_4995	10.6539	10.6605	10.6346	10.6122	10.6121	10.559	10.6329	10.6424	10.682	10.6633	10.6475	10.5875	10.6317	10.5787	10.5628	10.6256	10.601	10.5106	10.679	10.6732	10.5928	10.5808	10.5522	10.5619	10.6047	10.6995	10.6505
1D	AT1G45332_5051	5.04657	4.75573	4.83258	5.18312	5.07323	5.09995	5.1786	4.98974	5.01136	4.83691	4.94615	4.9562	5.16126	5.2485	5.32788	4.94738	5.01895	4.96289	4.9672	4.91602	4.84622	4.94234	5.19523	5.09818	4.92529	5.02087	4.89087
1D	AT5G16730_5055	7.44723	7.58526	7.57517	7.2371	7.31301	7.35985	7.37451	7.48834	7.55509	7.49171	7.34738	7.58075	7.32125	7.33584	7.16608	7.47277	7.52491	7.40339	7.51707	7.65425	7.60111	7.37224	7.0993	7.13462	7.36302	7.37478	7.47402
1D	AT3G11964_5137	5.5651	5.25988	5.34588	5.73598	5.81961	5.79993	5.74161	5.331	5.39862	5.24886	5.35991	5.25008	5.59722	5.7395	5.91898	5.5863	5.44895	5.49006	5.41416	5.38089	5.14351	5.25017	5.79355	5.80244	5.36178	5.47259	5.55112
1D	AT1G07920_5259	6.36221	6.10007	6.20046	6.42148	6.2989	6.05906	6.34783	6.1196	6.0541	6.20549	6.33227	6.22756	6.62291	6.72139	6.68678	6.52795	6.48572	6.61287	6.21394	6.11147	6.33646	6.59704	6.79958	6.7406	6.7165	6.61283	6.43756
1D	AT1G54680_5353	5.92718	5.88422	5.78419	5.79271	5.65196	5.77187	6.05032	6.07781	6.2266	6.24766	6.26033	6.33047	5.5006	5.48669	5.49192	5.89876	5.80217	5.92184	6.32176	6.3488	6.35588	5.96875	5.55343	5.61373	5.97067	6.02998	5.85846
1D	AT2G05220_5574	8.66655	8.75775	8.77287	8.81346	8.82861	8.69864	8.56034	8.76043	8.64943	8.65626	8.81009	8.63545	8.94836	8.9415	8.93246	8.88755	8.7392	8.85577	8.65648	8.70815	8.78026	8.72762	8.92679	8.89173	8.73379	8.84158	8.87131
1D	AT3G10610_5695	8.75388	8.84441	8.87049	9.05706	9.09357	8.81983	8.7328	8.73621	8.68165	8.605	8.78684	8.6085	8.93585	9.06163	8.951	8.91158	8.90089	9.18018	8.80526	8.78922	8.83519	8.86696	9.16767	9.13905	8.79541	9.00674	9.06814
1D	AT2G24060_5766	6.22472	6.24901	6.2085	6.15078	6.27829	6.23687	6.12728	6.37461	6.33294	6.38249	6.35792	6.31707	6.27327	6.15656	5.95705	6.14756	6.30408	6.34186	6.30644	6.32948	6.13462	6.15935	6.06118	6.07697	6.14651	6.20654	6.25969
1D	AT4G23620_6010	7.92963	7.89474	7.96885	8.04752	8.09626	7.96287	7.74251	7.72983	7.78082	7.76438	7.86993	7.70404	8.04047	8.05478	8.04591	7.8719	7.83572	7.8854	7.82107	7.78273	7.79457	7.96243	8.08508	8.01887	7.84926	7.927	7.93681
1D	AT3G05070_6061	8.11412	7.93205	8.00193	8.22199	8.18174	8.20687	8.20521	8.07447	8.23787	8.02146	8.18045	8.0966	8.09102	8.15406	8.2243	8.21903	8.10361	8.12765	8.18576	8.15522	7.95961	8.29051	8.16444	8.23425	8.12404	8.21821	8.08805
1D	AT5G48760_6069	8.46113	8.40888	8.49592	8.57352	8.58869	8.46019	8.46985	8.48907	8.39636	8.37687	8.53484	8.31337	8.53323	8.60763	8.48907	8.47186	8.59222	8.58307	8.53	8.50697	8.52513	8.42104	8.70634	8.66589	8.51523	8.60763	8.65508
1D	AT3G51250_6268	7.8234	7.98135	7.82784	7.70156	7.67642	7.59271	7.71015	7.8224	7.7924	7.93432	7.82146	7.89385	7.78469	7.67052	7.63442	7.6208	7.80278	7.69113	7.78218	7.69657	7.87338	7.82676	7.73603	7.65374	7.87994	7.86678	7.80573
1D	AT3G18670_6695	4.44504	4.20324	4.29907	4.47232	4.5163	4.54121	4.53593	4.11268	4.25624	4.06588	4.04695	4.0388	4.55376	4.55753	4.8077	4.21169	4.29515	4.33173	4.24591	4.0364	4.16412	4.31107	4.57333	4.60707	4.33573	4.23043	4.39308
1D	AT3G53220_6872	6.76416	6.81534	6.65846	6.94929	6.93919	7.00337	6.49403	6.60596	6.61928	6.76132	6.89959	6.72788	7.09429	7.01229	7.26556	6.95859	6.7279	6.87686	6.75135	6.72952	6.73657	6.90154	7.09028	7.14402	6.68688	6.66861	6.64969
1D	AT1G07920_6950	11.9885	12.1029	11.9708	12.0344	12.1671	11.9637	12.0307	11.9456	11.9648	12.0344	11.9735	11.9434	12.2332	12.2318	12.1678	12.0336	12.1113	12.1029	12.0503	11.9955	11.9637	12.0597	12.2463	12.233	11.9703	12.1703	12.1678
1D	AT3G53870_6973	10.2446	10.2518	10.2596	10.2901	10.2828	10.304	10.2856	10.1759	10.2255	10.2499	10.1666	10.2519	10.3456	10.4072	10.3637	10.2887	10.2809	10.3234	10.1851	10.2311	10.2073	10.3581	10.3875	10.3891	10.3269	10.2775	10.3637
1D	AT1G77940_7376	10.7311	10.696	10.6614	10.7053	10.7289	10.6614	10.7641	10.6379	10.6041	10.7155	10.7464	10.587	10.7476	10.7955	10.7006	10.7311	10.7019	10.7273	10.7294	10.6877	10.6537	10.7915	10.8073	10.8301	10.8148	10.8481	10.8074
1D	AT1G17080_7405	9.87462	9.85957	9.72993	9.6882	9.55737	9.68418	9.79404	9.86485	9.88805	9.96311	9.8561	9.98289	9.55369	9.51769	9.50223	9.63384	9.70774	9.57307	9.7927	9.78187	9.884	9.83325	9.52864	9.58983	9.83223	9.64306	9.62914
1D	AT5G54710_7531	4.40537	4.03754	3.63307	5.26621	5.11387	4.24673	4.82102	3.97203	3.69784	2.75196	2.92089	3.39355	4.93672	5.4294	4.69091	3.06015	4.61903	4.76773	3.47868	2.85228	2.86397	4.94867	5.61489	5.51739	3.45734	3.48673	4.50109
1D	AT4G22320_7621	7.17843	7.03934	7.09185	7.21543	7.29782	7.04033	6.88185	6.90887	6.92074	6.9235	7.0347	6.98551	7.22706	7.23765	7.25598	7.0196	7.15563	7.28481	6.91022	6.86597	6.91461	7.09174	7.2393	7.30087	7.06332	7.1863	7.17959
1D	AT1G07940_7654	3.5055	3.64084	3.77998	3.69379	3.57804	3.3691	3.42463	3.3567	3.27909	3.37586	3.26281	3.45614	3.97125	4.09428	3.65054	3.26846	3.69379	3.91545	3.3647	3.31495	3.68584	3.65054	4.04003	3.98896	3.43437	3.76852	3.92568
1D	AT5G03560_7659	8.09505	8.08413	8.00074	7.85861	7.87336	8.19064	8.32627	8.17453	8.21102	8.38355	8.27793	8.52805	7.88145	7.83385	7.96496	8.27807	8.17989	7.98016	8.30373	8.37898	8.29146	8.0734	7.78901	7.86824	8.13118	8.00355	8.13572
1D	AT5G59850_7861	10.3419	10.3336	10.3808	10.4427	10.4541	10.3294	10.2588	10.2441	10.2722	10.2691	10.2735	10.2411	10.47	10.4529	10.4106	10.3366	10.4063	10.4586	10.268	10.2287	10.3294	10.276	10.369	10.4138	10.3251	10.4723	10.4472
1D	AT2G47020_7870	4.80348	4.87083	4.75935	4.75726	4.62515	4.93368	5.1048	4.88484	4.84436	4.82319	4.93177	4.88604	4.72209	4.59341	4.77396	4.918	4.70934	4.63695	5.04141	5.09333	4.83145	4.52547	4.5704	4.51466	4.61125	4.763	4.82997
1D	AT1G23410_7885	8.18262	8.15267	8.18995	8.28546	8.43295	8.17866	7.94809	8.03707	7.77043	7.90132	8.23049	7.74332	8.45137	8.36558	8.28478	8.24971	8.2238	8.37228	8.11149	8.05294	8.03772	8.11692	8.46934	8.45792	8.20454	8.44425	8.4605
1D	AT2G20450_8045	8.86698	8.96208	8.79447	8.98474	9.08569	8.94577	8.83485	8.72428	8.74304	8.74685	9.02128	8.76904	9.06942	9.01178	9.01747	8.99983	8.96304	9.04874	9.00362	8.88676	8.8524	8.83684	9.0436	9.00133	8.85045	9.02743	9.0068
1D	AT4G18300_8102	6.74381	6.8969	6.97527	6.70799	6.7218	6.72056	6.63787	6.70404	6.76395	6.98507	6.96746	7.08914	6.77244	6.85415	6.93504	6.88091	6.97993	7.00252	6.88234	6.95734	7.02622	6.74246	6.92479	6.73075	6.68632	6.84409	6.96967
1D	AT5G14610_8561	3.30583	3.79337	3.49189	3.48538	2.96976	3.05108	3.37035	3.50658	3.39843	3.12186	3.1735	3.05265	3.0679	3.03257	2.63472	2.76321	2.9931	3.15987	3.56735	3.68524	3.76718	3.17628	3.45134	3.19019	3.0553	3.16468	3.42515
1D	AT5G11240_8701	6.83063	6.76622	6.81058	7.12517	7.06266	7.17826	7.0527	6.74675	6.91729	6.72035	6.8822	6.78585	7.0066	7.11867	7.28664	7.0545	6.81897	6.80987	6.93472	6.97846	6.71437	6.85921	7.20616	7.12824	6.80544	6.88934	6.89253
1D	AT1G23750_8721	7.46827	7.57037	7.55199	6.99174	7.1023	6.86921	6.97748	7.28326	6.87536	7.34946	7.21835	6.88879	6.94436	6.72235	6.64316	7.0222	7.05154	7.00624	7.06771	7.11233	7.04588	7.21767	6.77567	6.9719	7.45505	7.44475	7.031
1D	AT3G05560_8734	10.2593	10.2223	10.1767	10.2727	10.2896	10.1604	10.214	10.1576	10.1347	10.134	10.1622	10.1368	10.2805	10.3261	10.3261	10.2025	10.216	10.2841	10.1695	10.1223	10.1449	10.1726	10.2593	10.2656	10.2127	10.2738	10.2157
1D	AT5G57370_8982	8.56502	8.46566	8.35983	8.37092	8.35987	8.30517	8.57749	8.4148	8.48301	8.64044	8.61301	8.56907	8.43862	8.45376	8.44528	8.5086	8.4633	8.52078	8.62531	8.55913	8.38085	8.44883	8.30624	8.37585	8.53702	8.53821	8.45637
1D	AT1G11905_9193	7.5652	7.58396	7.75384	7.69319	7.70149	7.70318	7.66362	7.58974	7.65165	7.44848	7.6215	7.50724	7.5807	7.61116	7.8207	7.69028	7.60264	7.51607	7.42063	7.40105	7.45777	7.64982	7.7529	7.65876	7.60614	7.50965	7.55965
1D	AT5G60670_9353	8.67914	8.73931	8.6927	8.88494	8.96924	8.9754	8.86913	8.92406	8.90034	8.62119	8.75561	8.59202	8.9167	8.90943	8.78644	8.95906	8.74612	8.73582	8.87233	8.88599	8.79384	8.81647	8.90529	8.89693	8.81052	8.86781	9.01452
1D	AT4G02920_9425	8.89799	8.81045	8.77751	8.74152	8.57496	8.86738	9.0438	9.16951	9.20442	9.19947	9.09604	9.2711	8.84021	8.79151	8.60421	8.84549	9.00077	8.91101	9.11835	9.1411	9.18242	8.91575	8.65617	8.7718	9.00995	8.84756	8.92681
1D	AT5G25270_9428	5.40425	5.3294	5.47079	5.2765	5.1893	5.66734	5.78094	5.70932	5.70388	5.73079	5.70849	5.81944	5.36019	5.13038	5.29437	5.81839	5.57174	5.50207	5.71815	5.7176	5.65206	5.49841	5.31723	5.34172	5.60402	5.47233	5.52115
1D	AT3G16270_9467	4.15384	4.07858	4.22415	4.10532	3.94663	3.93187	4.09345	4.0729	3.98082	4.16664	4.32059	4.375	4.05002	3.98146	4.15473	4.23276	4.10532	4.11119	4.1668	4.17498	4.12715	3.8888	3.93941	3.91543	4.07505	4.12715	4.15473
1D	AT1G75200_9722	7.40244	7.08959	7.27879	7.59959	7.57465	7.59534	7.53686	7.31001	7.43314	7.11196	7.33113	7.29284	7.45786	6.95975	7.6564	7.49512	7.31623	7.35018	7.24934	7.2728	7.25425	7.33868	7.55295	7.53543	7.32417	7.39414	7.36875
1D	AT1G70340_9725	3.73444	3.96416	4.14596	3.72705	3.78481	3.38737	3.85538	3.81147	3.6885	3.7439	4.19347	3.85507	3.60903	3.78173	3.3414	3.85397	4.06359	3.81857	4.04425	4.2859	4.06658	3.82231	3.85397	3.80162	3.86212	3.89441	4.09924
1D	AT4G36530_9772	4.33503	4.27833	4.1681	4.12844	3.99442	4.31988	4.37548	4.23346	4.46907	4.39658	4.39588	4.31315	4.19296	4.07675	4.22159	4.16858	4.39658	4.14309	4.37899	4.33273	4.37822	4.14047	4.0035	4.08937	4.33273	4.1989	3.97138
1D	AT3G42150_9807	8.153	7.9677	7.95908	7.92791	7.99511	7.95004	8.26032	8.16069	8.1318	8.18465	8.20901	8.18223	7.83519	7.7462	7.80867	8.10055	8.16184	8.01782	8.18651	8.18957	8.06935	8.05407	7.88543	7.9448	8.15541	8.16311	8.11115
1D	AT3G52440_9914	2.87164	3.44248	3.24598	2.65452	3.11255	2.40907	2.4638	2.99253	2.52632	3.08188	3.07598	2.71446	2.59311	2.03952	1.62385	2.03201	2.2538	2.06037	2.70218	2.62637	3.25559	2.56994	3.03825	2.404	2.50858	2.92987	2.85205
1D	AT5G07090_9920	9.13564	9.08401	9.05211	9.17159	9.13327	9.07176	9.06701	9.03762	9.04718	8.98358	9.01973	8.94115	9.21612	9.17433	9.18365	9.1117	9.15614	9.20586	9.0988	9.02307	8.9846	9.05708	9.17996	9.1618	9.11861	9.2026	9.18113
1D	AT4G09012_9984	3.96266	3.85697	3.70459	4.20168	4.11888	3.77093	3.85697	3.83604	3.63012	3.63084	4.14164	3.91957	4.05578	4.06817	4.3219	4.16914	4.02997	4.12562	3.84953	3.69538	3.73809	3.87954	4.27932	4.36144	4.15594	4.25416	4.09305
1D	AT4G00810_10133	10.3629	10.3618	10.475	10.394	10.5702	10.4647	10.2425	10.3763	10.3096	10.3206	10.4755	10.1949	10.5124	10.4936	10.4537	10.4138	10.5852	10.6501	10.341	10.2814	10.211	10.4626	10.6696	10.6237	10.5587	10.6299	10.6512
1D	AT5G08340_10179	6.00537	5.94151	5.84051	5.75606	5.67454	6.01546	6.08986	5.84612	5.85606	6.1183	5.99815	6.04556	5.84055	5.74953	5.69365	5.93121	5.86222	5.78673	6.11725	6.14749	5.95395	6.00746	5.67484	5.7329	5.75947	5.81847	5.78135
1D	AT5G19510_10238	10.7846	10.7503	10.6426	10.7421	10.6598	10.7076	10.8492	10.8354	10.8454	10.7545	10.8419	10.8392	10.564	10.1943	10.6044	10.6848	10.6014	10.4425	10.8459	10.9807	10.7747	10.5887	10.4975	10.5181	10.549	10.6506	10.6044
1D	AT5G47700_10612	9.93484	9.99063	10.0524	10.0854	10.1677	10.0794	9.98604	10.2203	10.044	9.93593	10.1438	9.87126	10.0046	10.1209	10.0427	10.0338	10.0474	10.063	10.0738	9.99826	10.1604	10.1109	10.3439	10.2955	10.2126	10.0822	10.1542
1D	AT3G22230_11162	10.8194	10.774	10.8346	10.8408	10.8373	10.9103	10.9808	10.7977	10.7531	10.7676	10.8557	10.7377	10.8553	10.8272	10.9326	10.8662	10.8584	10.7859	10.826	10.8329	10.7984	10.8399	10.9544	10.9316	10.9146	10.8272	10.861
1D	AT5G40450_11658	8.22524	8.14966	8.36295	7.89466	8.26778	8.35187	8.1392	8.28308	8.40965	8.48748	8.38521	8.46753	8.08523	7.96891	8.25431	8.41781	8.24219	8.17883	8.32849	8.3845	8.09666	7.99422	7.7069	7.69478	8.04752	8.07454	7.98921
1D	AT1G16430_11840	7.14024	7.08829	7.14623	7.13364	7.25018	7.24207	7.08829	7.13889	7.0291	7.05395	7.19341	6.97266	7.16319	7.15811	7.26154	7.06832	7.1125	7.12551	7.13049	7.09687	7.02297	7.06268	7.24687	7.19515	7.12837	7.04875	7.09001
1D	AT2G01250_11884	11.5845	11.4332	11.5403	11.5747	11.5275	11.543	11.5898	11.5566	11.4901	11.4332	11.4445	11.456	11.5675	11.6392	11.5196	11.4715	11.4918	11.5171	11.4744	11.4287	11.4737	11.5743	11.558	11.5932	11.5033	11.5322	11.4534
1D	AT2G40590_12104	6.43943	6.6914	6.77582	6.73401	7.01826	6.77709	6.64237	6.83857	6.9505	6.61413	6.88159	6.59313	6.93073	7.03313	7.15605	7.02753	6.66524	6.86216	6.84206	6.91554	6.97986	7.01538	7.28454	7.00137	7.02667	7.15292	7.12491
1D	AT5G05570_12441	8.15349	8.15656	8.09701	7.92613	8.03601	7.92635	7.95651	8.00512	8.04875	8.15577	8.09573	8.17359	8.04031	8.03835	7.88678	8.0022	8.08652	7.96815	8.0378	7.95109	8.111	8.06803	7.85754	7.82385	8.19409	8.16051	8.14159
1D	AT3G10030_12465	7.67231	7.69489	7.63503	7.54713	7.54857	7.83154	8.06158	7.87422	7.84061	7.89264	7.80405	8.01949	7.51908	7.48568	7.52144	7.94853	7.78554	7.71761	7.99135	8.04794	7.73827	7.67379	7.50435	7.50837	7.7944	7.73099	7.81118
1D	AT3G02190_12503	8.1108	8.1279	8.19701	8.13354	8.17882	8.11714	8.08231	8.04825	8.05254	8.17441	8.23098	8.1144	8.36512	8.32074	8.36508	8.31587	8.21285	8.33453	8.11331	8.14101	8.12509	8.15359	8.32416	8.3919	8.15478	8.13441	8.13525
1D	AT4G27120_12919	7.78134	7.76461	7.80633	7.69147	7.67372	7.84531	7.59552	7.7874	7.75166	7.82705	7.7154	7.68899	7.70436	7.71457	7.69602	7.655	7.61376	7.74465	7.80127	7.67831	7.6638	7.59694	7.58359	7.55413	7.57001	7.64374	7.6534
1D	AT5G16730_13077	8.34155	8.44895	8.52926	8.07727	8.06948	8.19511	8.31254	8.33535	8.44314	8.43878	8.19228	8.46622	8.17298	8.21273	7.95914	8.19313	8.34681	8.37846	8.35135	8.39881	8.50527	8.25847	8.0028	8.09047	8.32661	8.28596	8.40582
1D	AT5G03560_13140	5.11782	5.06186	4.98974	5.12287	4.99239	5.11436	5.2507	5.08331	5.07067	5.18946	5.2076	5.40843	4.94928	4.85241	5.14323	5.22219	4.94148	4.8718	5.26403	5.36308	5.25441	4.8441	4.91757	5.00787	4.99239	4.9367	4.91976
1D	AT3G53740_13161	8.13334	8.13054	8.25398	8.2712	8.38832	8.30676	8.36015	8.39496	8.35932	8.16669	8.39771	8.11542	8.34171	8.44633	8.36154	8.44954	8.39826	8.43262	8.42293	8.46841	8.53768	8.50147	8.60842	8.52871	8.4376	8.45619	8.48023
1D	AT1G18540_13240	11.1648	11.0781	11.0221	11.1261	11.0838	11.126	11.0166	10.9939	11.0007	10.9864	10.9806	11.0368	11.0767	11.1365	11.1589	11.0377	11.1027	11.1271	11.0596	11.0092	10.9475	11.0689	11.0488	11.1326	11.0641	11.0478	11.0213
1D	AT4G30780_13270	7.55789	7.47222	7.52022	7.4644	7.38074	7.39485	7.47689	7.41349	7.5169	7.635	7.64527	7.68567	7.52716	7.53151	7.45394	7.5346	7.55069	7.52086	7.5088	7.44688	7.51526	7.46403	7.42548	7.48196	7.5473	7.53357	7.54799
1D	AT4G30690_13381	6.52965	6.26086	6.34328	6.12691	6.46134	6.10852	6.21831	6.6042	6.45949	6.60514	6.64008	6.69538	6.41038	6.19512	5.80179	6.2492	6.59768	6.52007	6.24542	6.08051	6.32279	6.29624	5.89773	6.02044	6.4038	6.51889	6.42325
1D	AT5G61170_13610	10.5723	10.5852	10.6277	10.6605	10.6307	10.5846	10.4494	10.4512	10.4493	10.5526	10.6053	10.4511	10.5817	10.6664	10.591	10.5631	10.5004	10.6766	10.5347	10.5313	10.4631	10.5731	10.6313	10.6502	10.5313	10.5927	10.5781
1D	AT1G63810_13651	7.76891	7.68591	7.65287	7.9725	7.83841	8.07521	8.02162	7.59867	7.63388	7.62436	7.62741	7.7015	7.97559	8.0497	8.15379	7.93243	7.62606	7.7247	7.84724	7.94999	7.6496	7.81027	8.05606	7.95704	7.67388	7.69574	7.68015
1D	AT1G09590_13786	10.4793	10.6029	10.6588	10.6746	10.7182	10.5988	10.4308	10.574	10.5534	10.4831	10.5483	10.4425	10.6277	10.7323	10.6766	10.6142	10.5458	10.6699	10.5147	10.5253	10.5529	10.535	10.7666	10.672	10.6211	10.6382	10.7159
1D	AT2G31820_14095	8.92296	8.59815	8.71815	8.64928	8.5721	8.71696	8.73058	8.87804	8.91274	8.88982	8.77324	9.02697	8.70406	8.76201	8.66752	8.78342	8.90154	8.95029	8.89292	8.83411	8.80126	8.92403	8.58036	8.69741	8.90217	8.82987	8.7913
1D	AT2G07725_14261	9.17309	9.20061	9.3147	8.70301	8.82267	8.91906	8.74488	8.90516	8.94545	9.28832	8.95987	9.08837	8.91501	8.74878	8.72844	8.79606	8.84569	9.00054	8.92023	8.99794	8.75136	8.89106	8.60949	8.69806	8.88904	8.91906	9.03255
1D	AT1G15250_14262	7.18651	7.25563	7.25408	7.29416	7.22701	7.3004	7.32771	7.20671	7.22076	7.27875	7.35139	7.22104	7.43196	7.42524	7.44327	7.26054	7.27392	7.24869	7.39149	7.43196	7.44617	7.34883	7.53397	7.53017	7.22701	7.33443	7.37528
1D	AT2G45710_14286	6.08762	6.05062	6.08839	6.25521	6.09297	5.99874	6.22902	5.91448	5.98193	6.01984	6.10078	5.94163	6.30069	6.4155	6.49099	6.2795	6.21678	6.2946	6.08568	6.09297	6.08007	6.29919	6.56662	6.54772	6.38843	6.31539	6.28839
1D	AT5G38640_14343	6.5382	6.43944	6.28681	6.55139	6.47195	6.60243	6.64158	6.38592	6.35303	6.41431	6.32914	6.48202	6.53506	6.61783	6.62982	6.50526	6.47684	6.47191	6.49527	6.35754	6.32538	6.55414	6.51343	6.58033	6.51431	6.52171	6.38945
1D	AT4G15770_14453	9.68351	9.5688	9.57325	9.84068	9.79648	9.89518	9.86998	9.57646	9.69231	9.54636	9.6788	9.61215	9.88195	9.83957	9.88495	9.74093	9.71952	9.66717	9.64486	9.73239	9.57042	9.75603	9.7932	9.9095	9.56055	9.59572	9.72072
1D	AT5G15520_14471	7.46843	7.4168	7.52854	7.71837	7.81918	7.48814	7.47035	7.58873	7.27902	7.27549	7.62234	7.21613	7.62466	7.53794	7.51462	7.51507	7.48217	7.58429	7.45648	7.38959	7.47982	7.5367	7.87556	7.82816	7.56143	7.74269	7.62745
1D	AT4G09620_14570	8.25503	8.40111	8.33418	8.24158	8.22059	8.06754	8.31283	8.39704	8.28289	8.42638	8.35855	8.31166	8.12047	8.28803	8.00053	8.15759	8.30005	8.29405	8.41673	8.45378	8.49863	8.37358	8.37039	8.34923	8.41375	8.43936	8.41185
1D	AT2G28510_14671	9.68339	9.56766	9.41006	9.22229	9.141	9.56029	9.10621	9.4612	9.72908	9.85693	9.66132	9.99961	9.54943	9.41189	10.0003	9.59841	9.63595	9.70663	9.67813	9.8877	9.72858	9.39171	9.27262	9.27478	9.51037	9.42122	9.42172
1D	AT5G08340_14818	7.13988	7.14685	7.04847	6.85799	6.81906	7.24304	7.19	7.02017	7.08979	7.19955	7.1763	7.20482	7.02461	6.76281	6.77687	7.05473	7.02126	6.81484	7.22745	7.24999	7.04485	7.22701	6.77489	6.87982	6.88972	6.9019	6.88715
1D	AT5G03560_14844	8.23294	8.41378	8.28589	8.10154	8.06995	8.44278	8.53024	8.47374	8.51403	8.60517	8.33892	8.79383	8.14942	8.00295	8.25913	8.55693	8.41445	8.35046	8.57372	8.7135	8.48377	8.32268	8.15372	8.07761	8.40538	8.33983	8.37208
1D	AT1G15810_14908	7.56409	7.66403	7.67143	7.58363	7.75421	7.57712	7.37174	7.54954	7.59035	7.5368	7.62883	7.51207	7.81373	7.82946	7.85977	7.6349	7.61354	7.59485	7.44635	7.44955	7.6939	7.71273	7.78045	7.71878	7.62841	7.6288	7.60266
1D	AT4G22380_15011	8.19547	7.95992	7.9563	8.35401	8.04993	8.37118	8.31082	8.02511	8.06343	7.91642	7.96501	8.09567	8.31434	8.42676	8.57102	8.29559	8.16598	8.30965	8.12328	8.15203	7.90904	8.30026	8.46009	8.45949	8.25815	8.1693	8.0913
1D	AT4G34670_15191	10.5607	10.6199	10.46	10.5336	10.4897	10.6019	10.5593	10.6052	10.5498	10.5745	10.4596	10.5604	10.4454	10.5079	10.392	10.402	10.4188	10.4156	10.5708	10.6112	10.5319	10.4803	10.4118	10.3996	10.386	10.4265	10.4841
1D	AT3G11250_15343	6.90039	6.97169	7.07834	7.14588	7.19068	6.85469	6.88038	6.90742	6.84645	6.81221	6.9575	6.85733	7.3134	7.22419	7.10771	7.03252	7.19044	7.2217	6.86297	6.79417	7.14856	6.97655	7.32983	7.21659	7.03585	7.1438	7.21354
1D	AT5G59840_15432	7.7224	7.75091	7.73762	7.6107	7.56389	7.63237	7.59824	7.69566	7.62403	7.6804	7.65318	7.7261	7.65503	7.61296	7.64557	7.68918	7.61307	7.65676	7.56835	7.69709	7.69814	7.70372	7.52231	7.52871	7.6752	7.64559	7.51527
1D	AT3G61240_15455	5.40963	5.22415	5.35676	5.54501	5.46783	5.3575	5.54816	5.37715	5.46048	5.24344	5.40724	5.38368	5.68491	5.7839	5.74756	5.48543	5.48105	5.33729	5.27705	5.18159	5.32319	5.44779	5.52634	5.56332	5.37559	5.42634	5.31269
1D	AT1G23790_15596	5.39456	5.64044	5.75174	5.24322	5.54385	5.09782	5.36055	5.51001	5.24887	5.6697	5.72577	5.46474	4.94231	5.22544	5.13474	5.46908	5.38608	5.54342	5.51838	5.60215	5.75647	5.18906	5.27403	5.23216	5.62186	5.4427	5.68279
1D	AT3G23390_15619	9.36159	9.38596	9.42958	9.40762	9.57568	9.32701	9.29464	9.32165	9.24383	9.31397	9.40976	9.19809	9.45305	9.55458	9.50747	9.53481	9.56287	9.65724	9.40638	9.30748	9.29562	9.54881	9.64773	9.63538	9.58226	9.59929	9.51847
1D	AT3G01790_15654	7.53343	7.51551	7.49746	7.7569	7.75372	7.75843	7.74025	7.78069	7.57931	7.42963	7.47974	7.37406	7.57192	7.66733	7.62463	7.68731	7.42826	7.42256	7.608	7.62156	7.43378	7.59167	7.80051	7.72321	7.50715	7.53595	7.54004
1D	AT3G10770_15706	9.01572	8.76784	8.84656	8.7348	8.79348	8.95619	9.1267	9.04264	9.11368	9.16344	8.97988	9.19336	8.66199	8.72092	8.59657	8.91204	8.89915	8.85869	9.1375	9.07819	8.80203	9.04802	8.64514	8.7015	8.93651	8.94795	8.90066
1D	AT4G02485_15977	6.56459	6.63517	6.68315	6.47058	6.64326	6.69415	6.49636	6.71873	6.68886	6.73509	6.66992	6.6436	6.58661	6.53326	6.63466	6.72138	6.68445	6.8155	6.75006	6.70906	6.68059	6.60519	6.59895	6.50817	6.67955	6.59727	6.76355
1D	AT1G16790_16377	6.92444	6.90433	6.91796	7.01245	6.99198	7.16152	6.86855	6.95339	7.00657	7.01245	6.95857	7.09995	7.14176	7.05723	7.33105	7.10086	7.00741	7.10049	6.94046	7.00721	6.85512	7.13952	7.24814	7.14739	6.98933	7.00258	6.95496
1D	AT1G12650_16561	6.76205	6.57402	6.7103	6.8777	6.98959	7.03383	7.03523	6.73603	6.73672	6.68159	6.75996	6.75014	6.89214	6.86302	6.94758	7.01771	6.7845	6.76496	6.78702	6.74584	6.66038	6.76847	6.89886	6.92175	6.66818	6.75549	6.72149
1D	AT5G11900_16752	7.89688	7.75413	7.84868	8.02124	7.95164	7.88454	7.81429	7.75462	7.77064	7.70876	7.82826	7.75568	7.95164	8.00579	7.94009	7.81823	7.97966	8.03501	7.76845	7.73469	7.79766	7.95472	8.05468	8.08346	7.8282	7.79192	7.88603
1D	AT4G00810_16918	9.30611	9.44515	9.56582	9.54689	9.54359	9.43477	9.2766	9.53693	9.5074	9.2501	9.56915	9.23412	9.57963	9.58776	9.53693	9.61721	9.6329	9.67014	9.33457	9.52261	9.59169	9.68512	9.78576	9.73194	9.72093	9.69625	9.71653
1D	AT1G56190_16965	7.0394	6.90067	6.93874	6.86145	6.75265	6.67522	6.78518	7.06935	6.98894	7.06477	7.19511	7.02253	6.97694	7.099	6.92413	6.98613	7.05215	7.0515	7.06083	7.10108	6.97803	7.0671	6.7718	6.79997	7.17994	7.14563	6.77551
1D	AT1G16740_17010	8.20151	8.17186	8.18678	8.29954	8.26525	8.16295	7.92071	8.06267	8.01718	8.00957	8.22665	8.12624	8.34608	8.35067	8.47783	8.31411	8.30867	8.30958	8.0923	8.11464	8.1179	8.18153	8.36009	8.40124	8.16384	8.24954	8.15812
1D	AT5G66010_17101	7.96443	8.05882	8.06332	7.94214	7.98493	8.1222	8.24164	8.15633	8.10209	8.18048	7.97075	8.18632	7.80263	7.86291	7.77176	8.14124	8.05499	8.09615	8.20677	8.16877	8.01787	8.01526	7.89657	7.89049	8.08306	8.07895	8.09633
1D	AT5G41190_17300	8.13858	8.08101	8.10765	8.2572	8.17233	8.36737	8.37419	8.04659	8.04825	8.0007	8.07939	8.05528	8.30624	8.22439	8.22016	8.19121	8.11987	8.15555	8.16251	8.10128	8.12923	8.17596	8.3156	8.25512	8.09379	8.07704	8.22215
1D	AT4G28450_17575	7.22053	7.1976	7.21769	7.39149	7.4271	7.53977	7.5188	7.12098	7.18132	7.32074	7.41244	7.18647	7.44502	7.49204	7.60048	7.51713	7.18635	7.22011	7.41411	7.48772	7.21192	7.35997	7.48889	7.55651	7.11254	7.26415	7.24539
1D	AT5G23550_17584	7.44975	7.42351	7.55996	7.3272	7.46548	7.43357	7.47598	7.48302	7.38595	7.58159	7.49004	7.5105	7.34257	7.37741	7.37434	7.54495	7.43087	7.40248	7.5117	7.48548	7.58947	7.50283	7.38804	7.37161	7.38022	7.4251	7.35827
1D	AT1G73180_17589	7.20374	7.29245	7.31756	7.14867	7.27272	7.30719	7.31735	7.2241	7.28363	7.41296	7.43646	7.34073	7.30768	7.27793	7.41653	7.42917	7.18176	7.17699	7.42926	7.53791	7.31211	7.14653	7.20374	7.11919	7.26675	7.37402	7.30238
1D	AT1G56045_18110	10.0155	9.99847	10.1039	10.1658	10.1195	10.0289	9.94857	10.0324	10.0645	9.87854	10.0688	9.89065	10.0278	10.2072	10.2254	10.0859	10.1728	10.2568	9.98951	10.081	10.1054	10.1476	10.3486	10.2899	10.2657	10.0998	10.1476
1D	AT1G70600_18130	11.742	11.7194	11.6521	11.8169	11.7216	11.7658	11.7194	11.7149	11.6962	11.694	11.7415	11.7402	11.7862	11.7401	11.8288	11.742	11.7523	11.7415	11.7583	11.6855	11.7112	11.7384	11.8399	11.7954	11.7611	11.7995	11.7384
1D	AT5G11900_18174	9.01168	8.87607	9.02166	9.13275	9.04236	9.06555	8.99358	8.94067	8.90664	8.96933	8.99069	8.98624	8.99164	9.0588	9.05551	8.96919	9.01373	9.08071	8.88626	8.79231	8.93147	9.06655	9.0323	9.11574	8.96026	8.92443	8.92277
1D	AT3G53470_18260	6.17262	6.58035	6.62662	5.88479	5.98668	5.97607	6.47353	6.49905	6.45324	6.51068	6.02335	6.32059	5.90631	5.84905	5.75295	6.27598	6.46046	6.3117	6.35374	6.46784	6.67835	6.22219	5.8973	6.14046	6.26921	6.19022	6.33357
1D	AT3G53390_18286	6.90917	6.94282	6.98123	6.87292	6.87535	6.81258	6.94571	6.87702	6.87975	6.9481	6.84986	6.93488	6.79054	6.78852	6.79986	6.78871	6.97714	6.871	6.86247	6.96752	6.94836	6.88795	6.8518	6.87047	6.83696	6.85797	6.99898
1D	AT4G29410_18306	9.16837	9.14895	9.14834	9.1437	9.10057	9.19269	9.19238	9.06541	9.03247	9.03537	9.18184	8.97921	9.23573	9.28307	9.26523	9.22628	9.17441	9.14114	9.19134	9.13196	9.05876	9.2297	9.32106	9.30414	9.25186	9.23769	9.14879
1D	AT2G01740_18435	5.2794	5.12987	5.34033	5.4474	5.46074	5.52006	5.47104	5.19944	5.34921	5.42323	5.44148	5.44708	5.55628	5.56042	5.63454	5.52944	5.23069	5.26714	5.29602	5.2477	5.25171	5.39158	5.47603	5.42994	5.22528	5.32146	5.32258
1D	AT1G16740_18475	8.58903	8.58523	8.52297	8.54402	8.57224	8.54759	8.29984	8.45097	8.34396	8.47995	8.57033	8.52631	8.72394	8.67271	8.79758	8.56225	8.52496	8.53139	8.39359	8.34277	8.44392	8.56957	8.59376	8.70312	8.53693	8.54544	8.42818
1D	AT1G44790_18605	7.51976	7.44559	7.40486	7.33686	7.43602	7.38846	7.29016	7.5	7.54085	7.74891	7.72454	7.72861	7.60556	7.4161	7.60294	7.67856	7.50615	7.53438	7.66585	7.52764	7.60791	7.58366	7.3753	7.41817	7.63653	7.64994	7.45217
1D	AT1G16180_18765	10.747	10.6512	10.6646	10.5907	10.5074	10.5877	10.8672	10.8554	10.8659	10.9276	10.7087	11.0137	10.4685	10.5415	10.4878	10.7683	10.7098	10.6894	10.7401	10.8245	10.8033	10.8725	10.3967	10.5084	10.7664	10.7196	10.5777
1D	AT2G16360_18786	6.12261	6.25597	6.34713	6.48638	6.63862	6.58863	6.25597	6.33677	6.56648	6.2943	6.60494	6.35348	6.75302	6.87181	6.92543	6.74774	6.35896	6.70324	6.50361	6.66759	6.39759	6.66062	6.96335	6.81683	6.64477	6.70422	6.8217
1D	AT2G44120_19263	6.93629	6.57148	6.71953	6.94979	6.83076	6.9021	7.00697	6.9956	6.79018	6.67829	6.97045	6.66355	6.88167	6.95178	7.00009	7.14019	6.93129	6.93715	6.81571	6.83281	6.57074	6.86939	6.94672	7.10687	6.95127	6.9277	6.71233
1D	AT1G12650_19300	8.34644	8.24512	8.31697	8.4921	8.3545	8.60774	8.62147	8.36098	8.46441	8.29011	8.39109	8.37583	8.52804	8.40611	8.56934	8.57036	8.51636	8.45573	8.45643	8.53063	8.35178	8.45151	8.52846	8.54862	8.40167	8.39	8.49181
1D	AT2G40510_19621	10.7616	10.7902	10.8729	10.8589	10.9116	10.8249	10.9264	10.814	10.7906	10.9005	10.7629	10.8248	10.8237	10.8628	10.9063	10.8903	10.842	10.8893	10.7981	10.7806	10.8052	10.8653	10.8878	10.9262	10.8506	10.9593	10.8811
1D	AT5G54940_19632	10.2209	10.3833	10.4271	10.1834	10.2719	10.2078	10.482	10.315	10.4453	10.7282	10.6088	10.8684	10.4218	10.3811	10.5325	10.4967	10.3559	10.0897	10.3614	10.4495	10.6403	10.3762	10.0174	10.0661	10.2828	10.18	10.0635
1D	AT3G22450_19671	3.20438	3.10492	3.03386	3.64514	3.60804	3.50037	3.49838	3.58909	3.65644	3.13083	3.23093	3.35032	3.47094	3.6831	3.57025	3.32798	3.06063	3.17138	3.45549	3.10629	3.17197	3.46342	3.40257	3.34413	3.10629	3.20314	3.09312
1D	AT4G36530_19720	7.58869	7.62598	7.48909	7.56499	7.38314	7.548	7.52962	7.70588	7.82126	7.68303	7.57592	7.65548	7.40955	7.33189	7.37574	7.46327	7.43128	7.54876	7.684	7.72989	7.61723	7.55307	7.31596	7.32301	7.6247	7.55942	7.30202
1D	AT3G23620_19854	9.33404	9.19347	9.25087	9.44107	9.39094	9.53137	9.46119	9.25879	9.23162	9.2218	9.35231	9.27074	9.37839	9.45814	9.50979	9.32154	9.32004	9.44625	9.32565	9.2302	9.26572	9.37222	9.46177	9.43127	9.34122	9.33039	9.28592
1D	AT1G57720_19861	10.8064	10.8293	10.8112	10.81	10.8523	10.8811	10.7849	10.9573	10.8878	10.7409	10.7434	10.864	10.6299	10.7307	10.6827	10.7691	10.6615	10.5993	10.7504	10.8993	10.7172	10.7106	10.5489	10.5086	10.5558	10.5717	10.6023
1D	AT5G08180_20085	9.19165	9.13056	9.17912	9.35853	9.38811	9.38501	9.38251	8.96993	9.10895	8.98275	9.20071	9.04959	9.40764	9.36747	9.43816	9.28548	9.28782	9.27744	9.05997	9.11573	9.209	9.30035	9.48841	9.46626	9.23957	9.28504	9.34776
1D	AT5G35910_20108	8.38978	8.33396	8.414	8.41602	8.39466	8.50319	8.47018	8.22151	8.24358	8.29845	8.27927	8.33299	8.46336	8.47325	8.39478	8.33419	8.41095	8.46732	8.31444	8.26056	8.30316	8.38754	8.46203	8.49621	8.35209	8.36339	8.41702
1D	AT3G17626_20237	6.33969	6.28948	6.27728	6.23744	6.25412	6.38945	6.31729	6.54383	6.4843	6.56876	6.66596	6.52785	6.17877	6.16719	5.98551	6.4105	6.5043	6.40979	6.64086	6.64107	6.62074	6.46272	6.18885	6.25933	6.53116	6.27393	6.51551
1D	AT1G62850_20338	3.33698	3.36657	3.51081	3.18221	3.13651	3.29285	3.74428	3.44192	3.41399	4.11159	3.09989	3.42857	2.92611	3.03537	2.72517	2.94218	3.13233	3.50737	3.58638	3.63912	3.40461	3.21764	3.09967	2.99932	3.28145	3.33937	3.62754
1D	AT5G07475_20508	8.89615	9.15806	8.90052	9.35935	9.1129	8.63962	8.69374	8.67022	9.10399	8.61085	8.28597	8.31246	9.13238	9.32091	9.25527	8.31055	8.43308	8.9156	8.59057	8.27406	8.83617	9.4389	9.21727	9.27617	8.78657	8.52319	8.49721
1D	AT4G27130_21254	10.5978	10.4633	10.4713	10.3036	10.18	10.5853	10.7933	10.7359	10.7679	10.8105	10.7062	10.9323	10.2697	10.1062	10.2781	10.5518	10.5502	10.3555	10.7225	10.809	10.6297	10.5457	10.0516	10.1678	10.5696	10.4992	10.3621
1D	AT2G32060_21344	9.79315	9.65488	9.76362	9.92788	9.86248	9.86245	9.81072	9.76011	9.69321	9.6178	9.85708	9.55998	9.82691	9.90721	9.98175	9.87915	9.84297	9.86099	9.79171	9.8	9.75245	9.71995	9.96508	9.95288	9.86248	9.7376	9.87914
1D	AT5G04160_21457	7.41087	7.74685	7.73036	7.16613	7.40814	7.13173	7.14008	7.40507	7.25866	7.3896	7.22168	6.9781	7.0537	6.73406	6.77766	6.84662	7.08892	6.99071	7.16989	7.17897	7.62411	7.17985	7.20854	7.16134	7.19995	7.21096	7.3753
1D	AT3G58660_21485	8.92475	8.99647	9.0828	9.17585	9.1919	9.20887	9.206	8.91497	8.92176	8.92354	8.83722	8.83763	9.1576	9.1821	9.26182	9.15424	8.89596	9.01505	8.94865	9.08615	8.80832	8.94756	9.19153	9.07338	8.87826	9.01607	9.0477
1D	AT1G15930_21610	10.1878	10.2404	10.1752	10.1573	10.172	10.1629	10.2724	10.3062	10.3044	10.2952	10.3053	10.238	10.1026	10.085	10.0927	10.2383	10.0958	10.1531	10.3564	10.3546	10.2598	10.072	10.0886	10.116	10.1772	10.1629	10.2347
1D	AT1G07930_21735	9.04421	9.0699	9.02332	9.10826	9.04898	8.90789	9.01492	8.98375	8.97946	9.01846	8.92041	9.0121	9.3036	9.31096	9.23421	9.24581	9.2231	9.27904	9.05626	9.01867	9.1421	9.20576	9.22808	9.26021	9.11382	9.1633	9.09238
1D	AT1G06380_21751	6.89062	6.95152	6.92083	7.08691	7.00441	7.08418	6.97697	6.87718	6.90405	6.88968	6.95425	6.98978	7.155	7.09395	7.25289	7.01267	7.00404	7.0086	6.94838	6.89237	6.75182	6.97207	7.17521	7.12015	6.99433	7.0585	6.94059
1D	AT2G47020_21907	6.59912	6.71365	6.61635	6.47959	6.49138	6.68957	6.8119	6.68432	6.54746	6.77584	6.60115	6.6804	6.40473	6.37717	6.46152	6.82005	6.44718	6.31819	6.81453	6.92711	6.72472	6.43822	6.34288	6.35528	6.46223	6.50507	6.51831
1D	AT4G31290_21960	9.23962	9.57996	9.64544	9.04602	9.14928	9.03061	9.83563	9.82529	9.60379	9.54651	9.36687	9.65937	8.81646	8.90451	8.99604	9.4129	9.20037	9.00505	9.30174	9.69831	9.71258	9.01867	8.82745	8.85035	9.12785	9.06131	9.18269
1D	AT2G01070_21967	7.06739	7.28633	7.30904	6.84049	6.96723	6.81611	6.80527	7.06106	7.00867	7.16638	7.0442	6.99798	6.93573	6.82865	6.75292	6.84285	7.04941	7.05529	7.00555	7.12101	7.28325	7.031	6.93729	6.94876	7.03636	7.06495	7.17946
1D	AT4G02920_22006	8.72415	8.83085	8.67309	8.68647	8.52174	8.66075	9.05319	9.11446	9.15718	9.15263	8.89526	9.21595	8.80622	8.73672	8.56309	8.81005	8.98025	8.86508	9.10313	9.05418	8.92311	8.85048	8.61524	8.70452	8.99666	8.94477	8.80817
1D	AT5G56710_22206	10.9248	10.8906	10.8754	10.9381	10.9986	10.8764	10.8165	10.8011	10.7834	10.8104	10.8456	10.8021	10.8994	10.9342	10.9349	10.8191	10.849	10.948	10.7784	10.7901	10.8519	10.859	10.9489	10.9566	10.8934	10.8615	10.9422
1D	AT4G17720_22754	7.6963	7.81375	7.76395	7.8269	7.83197	7.64394	7.62357	7.60437	7.52859	7.5923	7.67187	7.65423	7.72396	7.80917	7.78115	7.72375	7.70716	7.75777	7.55254	7.54746	7.77509	7.78449	7.79162	7.78843	7.64055	7.60805	7.62297
1D	AT3G20230_23052	7.64225	7.73644	7.54763	7.47587	7.52778	7.48777	7.47824	7.78599	7.7432	7.85153	7.81821	7.85283	7.5446	7.40648	7.4762	7.5903	7.59588	7.67453	7.78968	7.89776	7.83535	7.39101	7.45276	7.44912	7.5812	7.69218	7.75317
1D	AT3G05070_23123	7.49995	7.29532	7.29734	7.61224	7.50302	7.56573	7.67954	7.45207	7.48606	7.40154	7.50918	7.56719	7.59238	7.52466	7.67976	7.63143	7.45591	7.50637	7.55789	7.4675	7.35257	7.68205	7.59514	7.63926	7.5382	7.58942	7.43702
1D	AT3G49080_23237	7.69252	7.7709	7.79907	7.75493	7.82864	7.88978	7.63985	7.54237	7.62479	7.57729	7.70594	7.55067	7.89702	7.85723	7.91556	7.82691	7.67529	7.64515	7.67786	7.60334	7.69186	7.71671	7.83288	7.77077	7.65104	7.68767	7.74352
1D	AT2G20450_23294	8.37404	8.39533	8.51538	8.56433	8.57596	8.44062	8.38698	8.31926	8.32043	8.30465	8.58023	8.2516	8.65755	8.62276	8.61291	8.54481	8.49848	8.60219	8.53046	8.51735	8.5221	8.4663	8.65412	8.54337	8.47727	8.58001	8.58531
1D	AT3G61790_23577	9.55419	9.63343	9.53337	9.31402	9.24101	9.42435	9.47417	9.42937	9.63438	9.71858	9.56947	9.8352	9.39463	9.29455	9.33339	9.46874	9.54239	9.44314	9.55494	9.56427	9.68646	9.59338	9.25481	9.31852	9.57894	9.47129	9.51749
1D	AT1G51380_23766	6.77518	6.82324	6.75266	7.1426	7.10187	7.27165	6.81724	6.61227	6.6833	6.67145	6.83536	6.71951	7.01535	7.10875	7.34061	7.0616	6.74798	6.85585	6.8664	6.84161	6.79985	6.8034	7.24408	7.21523	6.67523	6.70586	6.81283
1D	AT5G66310_23837	6.27427	6.30638	6.3634	5.98484	6.09102	5.81828	6.03962	6.0206	5.67246	5.83148	5.79108	5.59284	5.76512	5.84082	5.41317	5.69642	5.98484	5.7249	6.06059	6.31304	6.11572	5.99976	5.86772	5.88282	5.89561	5.94343	5.94581
1D	AT3G04840_23862	9.44349	9.40047	9.23588	9.5957	9.57863	9.42278	9.28773	9.3876	9.31469	9.27524	9.3381	9.26387	9.54852	9.58907	9.60804	9.52529	9.40253	9.55111	9.31582	9.26353	9.25772	9.40181	9.50011	9.54661	9.49715	9.50861	9.37954
1D	AT2G41000_23908	5.81402	6.07715	5.93843	5.84317	5.74436	5.92607	5.97821	6.02403	6.12897	6.0316	5.86442	5.98252	5.73424	5.80718	5.84891	5.82266	5.78204	5.82181	5.94522	6.03304	5.90021	5.81554	5.74217	5.75012	5.94779	5.87047	5.8251
1D	AT3G16270_24220	7.41596	7.55381	7.47214	7.37169	7.43619	7.34508	7.48355	7.32204	7.40122	7.49155	7.3621	7.56926	7.35099	7.39618	7.37889	7.43874	7.43422	7.3621	7.49256	7.42085	7.454	7.33731	7.22123	7.24161	7.29421	7.2705	7.39527
1D	AT2G18110_24236	10.8678	10.8315	10.7823	10.7985	10.7889	10.8424	10.8739	11.0223	10.9811	10.9549	11.0122	11.0708	10.6645	10.6077	10.7396	10.8033	10.8118	10.6765	11.009	11.1021	11.0488	10.7957	10.6629	10.6691	10.7453	10.7421	10.8316
1D	AT1G29120_24996	0.616355	0.862362	1.74847	0.762833	0.625057	0.973124	0.838741	1.84345	1.39609	1.72384	1.68834	1.28343	1.255	0.654887	0.852862	1.66364	0.719702	0.673024	1.31671	1.15641	1.54069	1.09422	1.04123	0.641648	1.19516	0.738453	1.00288
1D	AT2G27710_25131	4.61728	4.52911	4.68348	4.83212	4.79087	4.68325	4.43837	4.58933	4.53488	4.38024	4.89739	4.40183	4.75298	4.87019	5.07987	5.01246	4.7847	4.90249	4.48402	4.33507	4.33839	4.54861	4.8324	4.91142	4.99231	4.93551	4.62956
1D	AT1G31660_25144	8.25426	8.05909	8.09114	8.45994	8.24126	8.44554	8.48248	8.0206	8.1954	8.01902	8.10101	8.07307	8.45703	8.48755	8.59006	8.29365	8.10345	8.26157	8.23912	8.18674	7.97547	8.1764	8.43942	8.38929	8.17183	8.24548	8.19265
1D	AT5G05100_25198	7.65318	7.49406	7.58067	7.39445	7.31024	7.43614	7.89513	7.70124	7.78047	7.86074	7.78409	7.8767	7.48673	7.36275	7.30258	7.72593	7.71242	7.52128	7.75676	7.75231	7.71016	7.68849	7.36247	7.2346	7.77652	7.73747	7.75058
1D	AT2G19730_25502	9.73062	9.70505	9.71538	9.78263	9.78673	9.61612	9.60718	9.6996	9.60757	9.63925	9.81458	9.65108	9.79412	9.80309	9.85007	9.74241	9.7426	9.86824	9.71538	9.59099	9.67284	9.82534	9.91604	9.88683	9.84948	9.87211	9.71591
1D	AT4G22320_25742	7.89699	7.77066	7.8171	7.9278	7.94974	7.69944	7.53028	7.64646	7.57499	7.6202	7.60282	7.60149	7.80682	7.87094	7.97657	7.6187	7.7185	7.87681	7.52761	7.5377	7.58637	7.7665	7.90771	7.947	7.8144	7.87579	7.73847
1D	AT2G07725_25743	9.14718	9.17446	9.19505	8.69422	8.8406	8.83352	8.57766	8.81211	8.8873	9.251	8.79448	9.07643	8.80426	8.61013	8.69708	8.67757	8.7342	8.93363	8.8249	8.96089	8.59087	8.70429	8.51842	8.58895	8.78513	8.85092	8.93225
1D	AT5G39900_25751	5.93504	6.08681	6.04344	6.15782	6.23428	6.15404	5.89182	6.06192	6.10536	5.9371	5.95711	5.96041	6.11797	6.16406	6.24143	6.16417	5.95026	6.03331	5.99469	5.97354	6.00511	6.01592	6.14537	6.09306	5.93962	5.98727	5.97036
1D	AT2G16930_25794	7.94158	8.09239	8.01796	7.81215	7.83231	7.79814	8.07314	8.09689	8.04925	8.12803	8.15037	8.11428	7.95929	7.81917	7.8066	7.97057	8.1119	7.8786	8.15201	8.1897	8.18554	8.06702	8.03111	7.92416	8.09591	8.06503	8.16267
1D	AT1G56690_25931	5.21129	5.24476	5.30957	5.51332	5.42193	5.55944	4.90707	5.15947	5.28407	5.30984	5.48707	5.29197	5.83764	5.6232	5.87797	5.54461	5.18319	5.352	5.27547	5.20774	5.17261	5.34325	5.49103	5.41751	5.13318	5.02494	5.19654
1D	AT5G25270_26228	6.71117	6.74521	6.76443	6.60959	6.66195	6.73262	6.85961	6.73527	6.80634	6.8945	6.81617	6.91588	6.63565	6.77253	6.52124	6.85866	6.8104	6.61686	6.91395	6.89916	6.87764	6.7291	6.55143	6.60675	6.89724	6.82959	6.94119
1D	AT2G25970_26316	9.83101	9.9094	9.92447	9.73868	9.68969	9.74728	10.008	9.69548	9.82278	9.96059	9.73644	9.99777	9.58368	9.47986	9.56223	9.83101	9.66418	9.67774	9.79828	9.84634	9.84042	9.7174	9.54409	9.65969	9.72873	9.69574	9.79244
1D	AT3G56430_26343	7.49807	7.5297	7.46328	7.59657	7.65481	7.70145	7.33521	7.38215	7.38443	7.356	7.2332	7.32125	7.69514	7.67022	7.83714	7.61562	7.47342	7.53677	7.38158	7.40916	7.21491	7.59875	7.64546	7.67613	7.34402	7.41716	7.35687
1D	AT4G39200_26682	11.7418	11.7662	11.7206	11.619	11.6207	11.629	11.7212	11.7536	11.7051	11.6934	11.617	11.6851	11.576	11.6094	11.588	11.667	11.6934	11.6036	11.7007	11.7305	11.6208	11.5934	11.5324	11.5613	11.6683	11.6557	11.6346
1D	AT1G07170_26814	7.94448	8.00316	7.9275	7.67871	7.75141	7.85775	8.18616	8.12466	8.07939	8.17105	8.19072	8.09929	7.70934	7.5613	7.61996	8.11849	7.97826	7.66287	8.24898	8.34313	8.11887	7.95482	7.63171	7.67512	7.95296	7.94258	7.87705
1D	AT2G03130_27058	2.97415	3.43378	2.36009	4.671	3.96215	3.3029	1.13161	2.29244	1.24868	2.14202	3.63462	2.99944	5.04604	4.95104	3.93892	4.11852	3.9414	4.61609	2.68074	2.21564	1.52616	4.33564	4.42685	4.66627	3.30026	4.03721	3.6158
1D	AT5G09510_27201	7.61108	7.62857	7.51786	7.78421	7.64948	7.52111	7.48725	7.49251	7.36311	7.32094	7.52875	7.3355	7.75707	7.79992	7.86708	7.5684	7.52573	7.61829	7.4757	7.35564	7.40248	7.56454	7.80268	7.78159	7.62556	7.69237	7.48225
1D	AT1G76570_27252	6.04936	6.02318	6.06889	5.91029	5.9756	6.0905	6.22705	6.14974	6.20448	6.07865	5.92292	6.0874	5.71922	5.78728	5.71757	5.95811	6.155	6.08432	6.03889	5.95675	5.90882	5.90275	5.91274	5.85096	6.07746	5.96139	6.1035
1D	AT4G28360_27387	7.52718	7.35345	7.44044	7.62687	7.6869	7.55798	7.37932	7.37936	7.32473	7.29303	7.46649	7.27681	7.57649	7.60015	7.53758	7.40087	7.4221	7.48769	7.33044	7.33505	7.29284	7.47683	7.60793	7.59921	7.469	7.5385	7.54378
1D	AT1G10340_27434	6.5246	6.47061	6.49226	7.39131	7.29099	6.32271	6.48906	6.78769	6.19735	6.27658	6.41903	6.55486	6.96161	7.50152	7.08915	5.86641	6.75116	7.33158	5.79799	5.60016	6.38963	6.67225	7.69454	7.45715	6.61011	6.3125	6.66489
1D	AT2G21580_27470	11.0757	10.9575	10.987	11.1512	11.0922	11.1566	11.2327	11.0648	11.1074	11.0016	11.0744	11.0751	11.0795	11.1184	11.1396	11.2137	11.084	11.0676	11.1094	11.1181	10.9496	11.1109	11.0952	11.1175	11.1345	11.1139	11.1109
1D	AT2G25970_27503	9.86854	9.83926	9.91171	9.75171	9.73994	9.80632	10.0215	9.73974	9.86155	9.97397	9.76175	10.0027	9.7686	9.7845	9.69538	9.81048	9.74007	9.6754	9.80884	9.86943	9.84381	9.73974	9.67657	9.7402	9.73994	9.73127	9.89122
1D	AT5G13310_27546	6.29247	6.13668	6.25854	6.38218	6.1928	6.43127	6.43028	6.29268	6.41072	6.12714	6.27952	6.42194	6.42336	6.36777	6.60464	6.55819	6.33331	6.34381	6.29347	6.285	6.14708	6.40924	6.38339	6.33327	6.43691	6.31315	6.29066
1D	AT2G07718_27580	10.7355	10.802	10.7351	10.4147	10.5527	10.4833	10.4023	10.6819	10.7114	10.8384	10.5045	10.868	10.6759	10.2804	10.4166	10.4155	10.6061	10.5583	10.5539	10.6567	10.5286	10.3702	10.1705	10.1931	10.4168	10.4833	10.6789
1D	AT5G55210_27600	6.73614	6.87883	6.85121	6.76167	6.85858	6.88294	6.91044	7.11387	7.11264	7.01203	6.98916	7.07382	6.77758	6.84295	6.7952	7.01025	7.0313	7.01816	7.08664	7.12041	7.09389	6.9737	6.91553	6.82365	7.01451	7.01207	7.06189
1D	AT1G26190_27604	6.50604	6.34022	6.4346	6.57049	6.57649	6.51658	6.31645	6.28724	6.27954	6.30349	6.27158	6.26916	6.47913	6.55428	6.7061	6.53531	6.27507	6.43772	6.23652	6.23476	6.21635	6.41487	6.47957	6.48671	6.40911	6.50118	6.28986
1D	AT3G61520_27670	8.70108	8.68925	8.67137	8.89518	8.90895	8.97905	8.52757	8.64778	8.78275	8.58075	8.63264	8.68082	8.86232	8.75749	8.96228	8.78275	8.61465	8.70593	8.67653	8.62598	8.63275	8.72624	8.69912	8.80082	8.60442	8.63759	8.68369
1D	AT2G17110_27803	6.46769	6.42898	6.35919	6.28251	6.31992	6.29957	6.3879	6.51413	6.52102	6.55875	6.5364	6.71003	6.26801	6.21773	6.16861	6.46219	6.53996	6.3659	6.53458	6.49285	6.70155	6.43297	6.14523	6.18159	6.52999	6.42858	6.4715
1D	AT5G24750_27971	6.12011	6.20424	6.10132	5.9829	5.92975	6.02455	5.85583	5.94329	5.9088	5.97562	6.04875	6.05702	5.99246	5.92532	6.12542	6.18414	6.08648	6.02405	6.12789	6.32785	6.30047	5.91859	5.96933	5.91921	5.99702	6.02455	6.14113
1D	AT5G09510_28095	8.02249	7.97381	7.97348	8.23057	8.19807	8.03946	8.00924	7.93652	7.90422	7.79845	7.98855	7.79079	8.17648	8.27825	8.32026	8.01744	8.02271	8.00664	7.92859	7.8246	7.90062	7.97503	8.28357	8.25475	8.09444	8.10517	8.09487
1D	AT2G42650_28178	6.7962	6.96871	6.98725	7.07562	6.96628	7.14597	7.1554	6.78233	6.78936	6.82176	6.93623	6.97426	7.14699	7.11717	7.2126	7.00724	6.93728	6.84467	6.94224	7.09813	6.96698	6.88363	7.16676	7.16933	6.73148	6.80717	7.02282
1D	AT4G10450_28388	9.46174	9.46267	9.44655	9.63774	9.61405	9.61938	9.65079	9.41837	9.36796	9.27119	9.45104	9.22371	9.62358	9.65683	9.68757	9.5675	9.4948	9.49153	9.44097	9.35796	9.39407	9.45105	9.7081	9.69363	9.483	9.58515	9.56911
1D	AT1G51650_28468	10.3188	10.4591	10.3209	10.1935	10.2158	10.1513	10.3281	10.4756	10.5318	10.4889	10.3615	10.4954	10.2723	10.2956	10.1841	10.4537	10.4458	10.309	10.5016	10.5288	10.5066	10.4099	10.1573	10.2079	10.4219	10.4204	10.2578
1D	AT1G12650_28514	8.35149	8.22139	8.10342	8.49061	8.41591	8.34357	8.65062	8.33186	8.45074	8.22176	8.33627	8.41253	8.54333	8.44115	8.541	8.50277	8.40195	8.33145	8.41253	8.39753	8.27788	8.44412	8.49814	8.51332	8.34358	8.39923	8.43941
1D	AT5G16730_28614	8.74337	8.78345	8.86359	8.44329	8.53587	8.61394	8.59932	8.55033	8.61523	8.58926	8.48266	8.7331	8.25517	8.24511	8.21733	8.48462	8.64547	8.56308	8.64394	8.79301	8.74199	8.41515	8.15892	8.23705	8.51154	8.45994	8.58661
1D	AT2G01690_28860	7.3589	7.51381	7.48412	7.33905	7.40571	7.3599	7.329	7.36461	7.42672	7.48156	7.39895	7.4313	7.39769	7.47312	7.29016	7.2874	7.41501	7.35404	7.45133	7.49436	7.54716	7.42466	7.42986	7.37249	7.4463	7.41788	7.54817
1D	AT2G40010_28998	7.17144	6.8634	7.04294	7.32286	7.33771	7.18467	7.15198	6.99145	6.74109	7.08278	7.18746	6.82924	7.58392	7.64635	7.26058	7.13313	7.27585	7.50643	7.01904	6.8384	6.91639	7.296	7.79026	7.78844	7.38036	7.43763	7.48183
1D	AT4G18030_29078	8.96273	8.91524	8.94054	8.75992	8.90019	8.97708	8.76302	8.88152	9.00515	8.80127	8.77608	8.77761	8.70441	8.69454	8.57322	8.76399	8.77203	8.88133	8.85081	8.90809	8.88325	8.8581	8.65351	8.69874	8.83672	8.80576	8.8953
1D	AT3G01800_29210	7.32286	7.31498	7.44552	7.59767	7.56484	7.68009	7.42927	7.20532	7.25863	7.22239	7.36906	7.29162	7.60154	7.62051	7.71718	7.41157	7.26249	7.41728	7.3461	7.39881	7.29474	7.43737	7.67494	7.59179	7.21109	7.29248	7.30419
1D	AT5G55210_29291	7.53872	7.48942	7.49037	7.40142	7.45092	7.485	7.58349	7.68522	7.65091	7.62574	7.61438	7.65025	7.40668	7.32843	7.37546	7.53995	7.60986	7.47805	7.703	7.73054	7.64924	7.56885	7.44394	7.47488	7.60327	7.59434	7.67219
1D	AT4G28360_29319	4.9414	4.71947	4.75383	5.01536	5.02291	4.80834	4.72834	4.82649	4.77108	4.66566	4.72834	4.56345	4.92852	4.94732	5.05734	4.80493	4.76703	4.88869	4.68052	4.58538	5.00968	4.85059	4.93444	5.01026	4.80698	4.85145	4.66858
1D	AT5G12220_29470	6.74081	6.49608	6.55201	6.95197	6.7378	7.02527	7.02426	6.55394	6.63018	6.50535	6.62617	6.53367	6.83336	6.9218	6.9416	6.8997	6.58253	6.68976	6.70639	6.77654	6.47727	6.70501	6.90405	6.95452	6.5945	6.69972	6.64851
1D	AT4G27120_29633	9.10968	9.04391	8.98769	8.90844	8.90242	8.98033	8.90059	8.99604	8.97188	8.98424	8.93629	9.09534	8.84918	8.56097	8.85614	8.8236	8.93437	8.82208	8.93544	8.94848	8.89335	8.98856	8.79566	8.81654	8.91232	8.89658	8.85614
1D	AT1G53345_30199	3.94687	4.01336	4.03491	4.07205	4.31116	4.17878	3.91872	3.82505	3.74622	4.03207	3.89241	3.67116	3.86756	4.21603	4.05753	3.81738	3.8211	4.06626	3.91155	3.90264	3.85918	3.89649	4.1212	4.18458	3.83796	3.7586	3.9918
1D	AT1G26880_30405	10.1227	10.1626	10.1688	10.2025	10.2204	10.1102	10.0765	10.0482	10.0719	10.0147	10.1679	10.0293	10.1509	10.1446	10.1806	10.1492	10.145	10.2478	10.1625	10.2463	10.1102	10.2246	10.3211	10.2198	10.1449	10.2037	10.1841
1D	AT5G12220_30514	8.1577	7.88691	7.99702	8.36593	8.1725	8.44362	8.45358	8.03689	8.09003	7.96028	8.02623	7.99308	8.38583	8.29973	8.52035	8.34346	7.97703	8.15091	8.15991	8.17504	7.88472	8.1757	8.30378	8.39956	7.98633	8.12915	8.04758
1D	AT1G15940_30715	4.64348	4.68771	4.72236	4.4321	4.62146	4.76084	4.45121	4.58704	4.46595	4.84143	4.522	4.65156	4.57427	4.51398	4.63197	4.51861	4.59591	4.65741	4.60088	4.6722	4.59809	4.2997	4.48366	4.42423	4.30673	4.36307	4.53846
1D	AT4G09830_30719	9.59022	9.39857	9.46966	9.32858	9.34625	9.46022	9.73276	9.9115	9.9597	9.74764	9.54317	9.92003	9.34274	8.92767	9.17538	9.47194	9.66039	9.56856	9.57325	9.49541	9.61514	9.45593	9.15637	9.17767	9.72306	9.63481	9.65611
1D	AT4G34660_31142	8.13479	8.33531	8.32233	8.09721	8.22765	8.17375	8.19669	8.16445	8.21893	8.32966	8.26808	8.38233	8.17055	8.18391	8.12789	8.14688	8.26338	8.28842	8.26217	8.33798	8.37502	8.28889	8.25451	8.16185	8.21723	8.20793	8.29113
1D	AT4G32175_31182	7.29857	7.1449	7.09702	7.30645	7.32983	7.30237	7.14386	7.12403	7.1347	7.13833	7.05025	7.15387	7.19139	7.27565	7.39425	7.27793	7.1269	7.24437	7.2295	7.24583	7.25166	7.23633	7.33071	7.38326	7.13248	7.09926	7.18186
1D	AT5G07090_31348	8.45063	8.40866	8.47232	8.56189	8.61149	8.47041	8.4344	8.53722	8.48832	8.2831	8.49227	8.2801	8.61749	8.70623	8.65021	8.59556	8.49142	8.55468	8.42915	8.41743	8.46111	8.48469	8.68568	8.56707	8.56776	8.60216	8.57783
1D	AT5G59240_31502	5.57745	5.41618	5.62173	5.79381	6.01391	5.92793	5.83826	5.43461	5.4002	5.32	5.80876	5.16619	5.97744	5.81502	6.17338	5.83745	5.8653	5.82006	5.59557	5.59756	5.54041	5.79562	6.26748	6.17623	5.72553	5.95057	5.82067
1D	AT1G45332_31520	8.48195	8.31908	8.30576	8.45697	8.39622	8.41096	8.39801	8.26062	8.28395	8.29363	8.27197	8.33788	8.45874	8.54823	8.52159	8.36825	8.26584	8.26675	8.28289	8.35016	8.30855	8.39649	8.41655	8.44962	8.25696	8.29979	8.34352
1D	AT2G32220_31799	3.70941	3.68304	3.56907	3.86101	3.47193	3.5875	3.78972	3.43973	3.51035	3.25319	3.74565	3.61451	3.97997	3.85217	4.25291	3.8091	3.84915	3.7517	3.68471	3.77269	3.87363	3.73739	4.12165	4.13067	3.80247	3.80073	3.62561
1D	AT2G34970_31904	7.71728	7.69354	7.70229	7.75372	7.75129	7.80425	7.61315	7.59353	7.63356	7.63687	7.75206	7.75673	7.87473	7.88744	7.8577	7.73343	7.77696	7.79443	7.76937	7.74074	7.71443	7.70511	7.77867	7.78408	7.70352	7.70363	7.69159
1D	AT1G57720_32392	9.33463	9.22828	9.18101	9.28547	9.22789	9.17722	9.2896	9.37011	9.22921	9.25669	9.18674	9.20607	9.14865	9.06811	9.12078	9.14282	9.10648	9.0203	9.23364	9.18331	9.13599	9.07088	9.04888	9.03773	9.08271	9.16582	9.07666
1D	AT1G76820_32429	4.91974	5.12893	5.02608	4.75806	4.96002	5.03651	5.11786	5.20341	5.2186	5.34763	4.91872	5.33264	4.92955	4.91588	4.63142	5.2369	5.34273	5.34532	5.27604	5.31478	5.28203	4.95052	4.7416	4.76592	4.73014	4.74523	5.35097
1D	AT5G47700_32642	10.3287	10.41	10.3344	10.4134	10.4877	10.3198	10.3843	10.4833	10.373	10.3201	10.4938	10.3374	10.413	10.5126	10.3526	10.4016	10.4711	10.5139	10.4059	10.3455	10.4217	10.576	10.6688	10.6393	10.577	10.5223	10.4505
1D	AT5G66010_32683	7.28883	7.42738	7.43187	7.28366	7.32148	7.39191	7.56245	7.37792	7.36262	7.52667	7.37062	7.46517	7.21313	7.27782	7.17814	7.43931	7.45616	7.34749	7.52343	7.51655	7.4445	7.27149	7.21829	7.21422	7.35599	7.30759	7.43265
1D	AT5G17560_33003	8.85662	8.88071	8.91109	8.95991	8.88079	8.86275	8.83151	8.73904	8.7959	8.80345	8.86895	8.9054	8.8845	8.95467	9.00318	8.87693	8.95004	9.04368	8.8174	8.83941	8.76738	8.97454	9.00659	9.00157	9.05086	8.99501	8.90282
1D	AT3G54210_33058	9.34561	9.28436	9.14237	9.12938	9.1256	9.15147	9.24623	9.39224	9.4727	9.54275	9.39027	9.5584	9.27007	9.16301	9.08118	9.15817	9.28349	9.23854	9.37335	9.3565	9.3806	9.31507	9.00447	9.06533	9.35345	9.33758	9.13649
1D	AT1G13930_33172	12.2178	12.1951	12.2267	12.0829	12.0205	12.2034	12.1951	12.2124	12.2673	12.2437	12.1951	12.2267	11.9553	12.0068	11.8465	11.8801	12.2437	12.1951	12.2267	12.1606	12.2791	12.2691	11.8984	11.8612	12.1606	12.0068	12.0652
1D	AT3G61240_33259	8.26731	8.14248	8.16611	8.29535	8.29942	8.27865	8.20942	8.06621	8.16326	8.01769	8.06081	8.16611	8.28885	8.38255	8.31801	8.08061	8.20182	8.22931	8.06811	8.04938	8.07631	8.23292	8.289	8.28321	8.13867	8.15816	8.14183
1D	AT4G39970_33352	6.7305	6.48909	6.27814	6.39873	6.30388	6.422	6.17913	6.27665	6.48482	6.74605	6.79737	6.77684	6.65251	6.4016	6.89741	6.50415	6.53855	6.71387	6.65502	6.75398	6.71517	6.42157	6.32069	6.49186	6.61639	6.60501	6.42636
1D	AT1G23410_33381	8.33364	8.27829	8.42187	8.4606	8.56576	8.40929	8.1659	8.20305	7.98756	8.09526	8.32403	7.93231	8.59111	8.52815	8.38263	8.39248	8.3435	8.54175	8.2367	8.11843	8.22207	8.28096	8.59334	8.46708	8.41666	8.54181	8.59409
1D	AT1G06380_33502	7.53851	7.53041	7.44674	7.62289	7.56792	7.63378	7.3935	7.49561	7.4341	7.48933	7.60088	7.54715	7.66892	7.66547	7.76947	7.62498	7.50475	7.62969	7.53373	7.58088	7.48161	7.48136	7.68972	7.65466	7.46918	7.5555	7.48046
1D	AT2G39390_33512	8.94331	8.97878	9.00981	9.11907	9.17518	9.02849	9.01013	8.90739	8.9558	8.96701	9.26881	8.9211	9.16147	9.18676	9.17475	9.16563	9.18086	9.22016	9.15088	9.18443	9.15461	9.16725	9.3459	9.29293	9.18443	9.25768	9.22239
1D	AT1G54290_33781	7.3753	7.54365	7.41465	7.6167	7.42515	7.38488	7.57878	7.36929	7.45513	7.39284	7.33799	7.59695	7.54801	7.60446	7.63875	7.40945	7.52892	7.60754	7.46515	7.40961	7.33907	7.59101	7.65677	7.6476	7.55878	7.38868	7.4392
1D	AT5G52650_33783	7.95147	7.76207	7.85136	8.14663	8.03646	7.87406	7.91166	7.89695	7.80774	7.76504	7.98374	7.73403	8.10864	8.11661	8.16717	8.08692	7.90528	8.10688	7.8366	7.77319	7.72469	7.89475	8.11168	8.19254	8.05585	8.01035	7.8719
1D	AT3G06680_33938	9.2263	9.37867	9.44023	9.40074	9.57041	9.42361	9.20785	9.37244	9.43299	9.26654	9.46194	9.25283	9.5581	9.62346	9.63372	9.58049	9.4542	9.63637	9.34814	9.36278	9.43798	9.57775	9.72433	9.54815	9.71293	9.71456	9.66256
1D	AT3G10030_34175	7.61802	7.67136	7.60344	7.40748	7.525	7.6627	8.04275	7.76212	7.70604	7.93675	7.76635	7.90212	7.39655	7.41641	7.30243	7.85252	7.66843	7.50177	7.89226	7.97691	7.81886	7.53185	7.30309	7.37376	7.58893	7.54869	7.66102
1D	AT5G58420_34267	7.78727	7.6908	7.83504	7.91634	7.90462	7.81584	7.8088	7.81085	7.72504	7.58624	7.82986	7.60334	8.01506	8.03196	7.97147	7.99816	7.83073	7.83272	7.69006	7.65714	7.70229	7.58643	7.9293	7.91862	7.85231	7.91038	7.86938
1D	AT3G01130_34314	8.29928	8.24616	8.21454	8.04509	8.0261	8.00972	7.94932	8.11893	8.14622	8.28662	8.30019	8.16654	8.04172	8.04497	8.06984	8.25099	7.99735	8.1634	8.30214	8.23712	8.17249	8.30577	8.08529	8.07688	8.34121	8.29018	8.1033
1D	AT4G14740_34389	8.30899	8.28119	8.35059	8.14426	8.26008	8.30426	7.96445	8.30984	8.49363	8.66591	8.44865	8.7228	8.38868	8.27148	8.37424	8.20533	8.44879	8.45973	8.38878	8.46689	8.32582	8.28515	8.16609	8.13322	8.07808	8.14439	8.31728
1D	AT1G13930_34481	11.6987	11.6637	11.5945	11.3826	11.3949	11.5764	11.5417	11.811	11.812	11.7311	11.6885	11.799	11.3306	11.3699	11.1315	11.3734	11.7124	11.614	11.639	11.5201	11.7238	11.6171	11.2069	11.2715	11.5201	11.3371	11.4653
1D	AT1G67660_34601	4.68077	4.52006	4.53143	4.68726	4.72195	4.72729	4.7469	4.70908	4.70468	4.73116	4.54596	4.7281	4.88003	4.88183	4.87735	4.68936	4.76145	4.7844	4.68078	4.52087	4.51613	4.53064	4.64862	4.7029	4.53092	4.64643	4.63196
1D	AT5G40450_34893	8.72271	8.72883	8.84504	8.56723	8.64811	8.83529	8.65189	8.87243	9.03186	9.13556	8.89981	9.17465	8.79219	8.68462	8.85809	8.91744	8.86588	8.86299	8.94807	8.94886	8.66519	8.84215	8.41473	8.47689	8.93989	8.83529	8.62006
1D	AT1G64510_35034	7.84302	7.83461	7.69864	7.69868	7.73185	7.50441	7.67856	7.90728	7.907	8.03023	7.91679	7.86719	7.75305	7.74724	7.45551	7.5758	7.81073	7.8309	7.90233	7.96197	7.95447	7.66089	7.5825	7.68834	7.7855	7.84825	7.82689
1D	AT5G18630_35222	8.1894	8.40907	8.30664	8.14465	8.16577	7.91604	8.25914	8.32387	8.36157	8.53073	8.43362	8.62836	8.05796	8.08786	7.85687	8.01081	8.2653	8.17197	8.13101	8.04526	8.37843	8.12594	8.05695	8.00569	8.40974	8.29135	8.34747
1D	AT5G25230_35362	6.29453	6.40644	6.45734	6.52424	6.65244	6.62646	6.50845	6.29197	6.28997	6.25128	6.25238	6.27444	6.54227	6.58924	6.64554	6.50815	6.25997	6.34513	6.35812	6.37532	6.36082	6.39606	6.60072	6.44484	6.24855	6.31708	6.32095
1D	AT2G45030_35380	8.37079	8.23271	8.2818	8.40116	8.34184	8.4249	8.31836	8.20193	8.21445	8.19967	8.28276	8.24075	8.4275	8.3679	8.47308	8.35289	8.1964	8.24956	8.29945	8.25628	8.18436	8.33443	8.36331	8.3657	8.24003	8.2288	8.20336
1D	AT1G76720_35486	3.77642	3.98238	3.98499	3.46542	3.73751	3.95467	3.98238	4.06806	4.08402	4.16797	3.67853	3.96548	3.66161	3.69359	3.34457	3.731	4.13917	4.17649	4.09897	4.13617	3.8548	3.71044	3.3926	3.45126	3.55264	3.35425	4.18353
1D	AT5G27700_35728	9.87455	9.87473	9.93728	9.89203	9.90718	9.922	9.95046	9.99459	9.98651	9.96378	10.0625	10.0278	9.88415	9.84751	9.76542	10.0169	9.9713	9.85885	10.0586	10.1052	10.0323	9.88333	9.81076	9.79805	9.88069	9.91727	9.94414
1D	AT4G14740_35774	8.36958	8.41402	8.39931	8.20345	8.26574	8.28989	8.04544	8.38258	8.51021	8.68903	8.3581	8.75225	8.54478	8.39167	8.41615	8.242	8.46901	8.50188	8.41839	8.39668	8.45138	8.2517	8.10217	8.16164	8.07601	8.16318	8.30826
1D	AT4G25770_35899	7.06976	7.11168	7.16405	7.05791	7.01451	7.11644	7.1992	7.24131	7.21145	7.27761	7.18396	7.27599	7.07397	7.09901	6.96927	7.26615	7.25077	7.26596	7.13112	7.08886	7.25105	7.16192	7.05502	7.05166	7.27216	7.20515	7.21157
1D	AT1G21930_36085	8.21875	8.12441	8.09261	8.07978	8.11736	8.06273	8.30988	8.30207	8.30272	8.39214	8.34784	8.3581	8.0796	8.13635	7.9273	8.20685	8.26544	8.24347	8.31684	8.34421	8.29504	8.25758	8.05289	8.09709	8.36633	8.29248	8.29254
1D	AT3G07910_36119	8.49244	8.54765	8.54153	8.62584	8.53331	8.40186	8.57042	8.4928	8.56082	8.56136	8.43947	8.60824	8.65186	8.76159	8.79227	8.5952	8.59996	8.76573	8.5735	8.45836	8.49038	8.75305	8.81565	8.78824	8.75037	8.68817	8.55713
1D	AT5G53930_36187	7.66795	7.667	7.69649	7.54388	7.61816	7.58237	7.57912	7.58448	7.65696	7.64151	7.62251	7.71673	7.60361	7.62462	7.67436	7.61948	7.71415	7.62657	7.63984	7.54683	7.72316	7.60819	7.52471	7.49798	7.61816	7.55766	7.68183
1D	AT1G16180_36263	9.90525	9.67998	9.67077	9.63582	9.52927	9.64781	9.93539	9.93567	9.95516	10.016	9.83975	10.1387	9.62697	9.72992	9.53099	9.85411	9.93576	9.75494	9.89268	9.88544	9.87654	9.91839	9.44424	9.59848	9.96468	9.83712	9.68575
1D	AT1G71900_36392	5.63437	5.45135	5.60271	5.42339	5.37356	5.47553	5.56227	5.42373	5.6249	5.64527	5.7298	5.71992	5.43048	5.47553	5.76148	5.73533	5.40735	5.4269	5.59455	5.64996	5.53291	5.42866	5.3587	5.29488	5.74676	5.64197	5.42373
1D	AT1G09740_36638	9.72162	9.98775	9.71672	9.68413	9.66013	9.49804	9.95435	9.8426	9.76279	10.2619	10.1286	10.2995	9.4691	9.73999	9.42244	9.65609	9.7095	9.60479	9.94849	9.96294	10.1752	9.78732	9.728	9.69971	9.82585	9.74973	9.63965
1D	AT4G28450_37003	6.41128	6.42233	6.4616	6.72297	6.55437	6.82118	6.75803	6.36567	6.38554	6.40177	6.61092	6.43418	6.71923	6.73893	6.89562	6.70615	6.36025	6.37915	6.60829	6.66266	6.42852	6.59805	6.79687	6.74192	6.45631	6.50004	6.44771
1D	AT4G21580_37067	9.20776	9.4274	9.39222	9.0914	9.00151	9.06707	9.21424	9.17576	9.202	9.44172	9.20682	9.51144	9.10758	9.08524	9.30708	9.30264	9.22584	9.1395	9.17461	9.22473	9.47049	9.05748	9.00133	9.07419	9.22953	9.16873	9.10375
1D	AT5G53920_37092	6.50442	6.38086	6.47847	6.51553	6.63122	6.68241	6.42806	6.39184	6.38673	6.44193	6.42394	6.49832	6.49536	6.58473	6.78901	6.41866	6.53727	6.59064	6.40993	6.41946	6.41518	6.46649	6.65763	6.60711	6.32266	6.35656	6.47403
1D	AT4G37440_37129	9.25418	9.15849	9.17656	9.00858	9.01246	9.15996	9.26656	9.21026	9.31214	9.38584	9.16822	9.45169	9.07178	9.06908	8.889	9.08047	9.21519	9.2053	9.2425	9.06818	9.23957	9.18753	8.90032	8.95153	9.25539	9.09538	9.26666
1D	AT5G05100_37148	8.69394	8.70249	8.67762	8.56818	8.59727	8.81992	9.0794	8.92784	8.98579	9.08245	8.84223	9.0821	8.55354	8.55447	8.37116	8.91476	8.72945	8.67459	8.92893	8.88623	8.72726	8.86166	8.47796	8.52108	8.8233	8.78763	8.79378
1D	AT1G76720_37307	4.96008	5.28382	4.91593	4.52408	4.80533	5.03537	4.74075	4.96119	5.02432	5.35647	5.14589	5.22767	4.81015	4.69884	4.45363	5.04104	5.04703	5.07517	5.41512	5.51782	5.18487	4.88444	4.57125	4.43773	4.53157	4.48885	5.1771
1D	AT1G44770_37692	8.80708	8.85589	8.77902	8.69932	8.75858	8.62784	8.9562	8.95741	8.96687	9.22579	9.06926	9.23582	8.51956	8.71405	8.41322	8.50077	8.84763	8.82489	8.89073	8.77627	9.13277	8.82611	8.67609	8.67772	8.8949	8.79921	8.95741
1D	AT3G04840_37731	6.25716	5.97756	6.15603	6.43651	6.37131	6.21146	6.22787	6.1593	5.97464	6.07643	6.29001	5.93591	6.48179	6.54063	6.56614	6.39303	6.19309	6.31813	6.0245	5.85779	6.02091	6.21302	6.52339	6.55993	6.37687	6.42629	6.18599
1D	AT3G61790_37834	7.16719	7.05063	6.98196	7.0397	6.8346	6.86206	7.15988	7.11029	7.01159	7.19829	7.15514	7.30039	7.00027	7.00453	7.03454	7.08573	7.07589	7.05288	7.14593	7.05051	7.17115	7.00064	6.9707	7.03571	7.18472	7.15269	6.93207
1D	AT4G34555_37844	9.01611	9.05246	9.16283	9.23274	9.28853	9.12898	8.95729	8.99623	8.94225	8.92131	9.06345	8.83325	9.173	9.24032	9.25829	9.15361	9.08285	9.31021	8.96146	8.84957	8.93013	9.12212	9.37187	9.33001	9.24219	9.26236	9.26811
1D	AT1G09680_37870	5.9557	5.84277	5.86231	5.99561	5.99058	6.1884	5.94397	5.88205	5.94687	5.96124	5.93364	6.08196	6.04846	6.04649	6.159	6.04251	5.95644	6.01832	5.97836	5.99058	5.87173	5.94491	5.98614	6.02523	5.75046	5.86766	5.85871
1D	AT1G13930_37950	11.1962	11.2024	11.1847	10.8673	10.8885	11.0946	11.02	11.409	11.3851	11.4857	11.3036	11.4344	10.8295	10.8842	10.7293	10.8118	11.1873	11.1365	11.1936	11.2311	11.2606	11.1543	10.749	10.7593	11.0976	10.9448	11.0875
1D	AT5G18640_38286	7.8846	7.94479	7.9188	7.76424	7.73222	7.6706	7.88827	7.94035	7.92812	8.13672	7.90382	8.09799	7.72088	7.78663	7.5529	7.60095	7.9064	7.88658	7.87718	7.82921	8.03491	7.78219	7.71888	7.69826	7.82349	7.84209	7.94316
1D	AT1G44770_38389	7.16593	7.23438	7.14965	7.18644	7.13358	7.07402	7.47091	7.40041	7.39212	7.55406	7.52585	7.6327	7.18665	7.2109	6.92661	7.13208	7.43401	7.29842	7.38282	7.33265	7.59159	7.2862	7.19522	7.14322	7.34609	7.2402	7.38762
1D	AT5G08415_38549	6.49991	6.61352	6.61748	6.81822	6.76509	6.62069	6.40326	6.63817	6.68135	6.56857	6.55086	6.49818	6.83273	6.95884	6.71831	6.45685	6.51164	6.7803	6.484	6.45355	6.56071	6.80951	6.79188	6.79747	6.65627	6.67231	6.50449
1D	AT1G06200_38561	9.56573	9.58308	9.49295	9.29895	9.37335	9.64448	9.58624	9.57468	9.63748	9.79664	9.75748	9.90439	9.22455	9.21652	9.43285	9.52704	9.49124	9.3043	9.74502	9.70491	9.58728	9.63467	9.21071	9.23867	9.4987	9.37493	9.29229
1D	AT2G01250_38581	11.2798	11.1544	11.1855	11.2729	11.2367	11.2443	11.2581	11.1716	11.2499	11.1701	11.1865	11.1328	11.277	11.3297	11.2393	11.1574	11.1484	11.1822	11.1753	11.1246	11.1418	11.2468	11.1971	11.2732	11.1786	11.1776	11.2162
1D	AT1G10020_38624	7.28374	7.2454	7.21962	7.20159	7.14401	7.0132	7.18152	7.26076	7.40164	7.26176	7.28342	7.46676	7.13245	7.15826	7.02851	7.13037	7.1366	7.13844	7.26283	7.13997	7.06602	7.14706	6.85832	6.9449	7.47316	7.38633	7.21884
1D	AT1G19000_38638	8.38494	8.29602	8.25575	8.17771	8.11558	8.27744	8.46796	8.43486	8.56412	8.58088	8.39122	8.60214	8.26512	8.32476	7.91784	8.24844	8.45923	8.47581	8.45346	8.38828	8.393	8.50379	8.07897	8.17375	8.42201	8.33539	8.37846
1D	AT1G12650_39124	7.49884	7.31527	7.35858	7.63063	7.56688	7.742	7.7747	7.39175	7.36135	7.31809	7.45171	7.42632	7.43208	7.49042	7.57634	7.64683	7.44921	7.47863	7.52664	7.5269	7.36912	7.45135	7.54986	7.558	7.38821	7.43619	7.40707
1D	AT1G45332_39258	7.60046	7.50498	7.56648	7.71668	7.73402	7.80059	7.68517	7.55563	7.64507	7.52191	7.54771	7.54712	7.75881	7.76507	7.93614	7.67691	7.53569	7.61919	7.53317	7.47204	7.46162	7.69356	7.72502	7.74165	7.50167	7.56758	7.53589
1D	AT3G22230_39922	9.90482	9.82919	9.87467	9.93611	9.93828	9.95893	9.98591	9.88557	9.87511	9.82056	9.91224	9.79211	9.89677	9.93125	10.0328	10.0318	9.94214	9.93948	9.94176	9.95895	9.92194	9.97751	9.99968	9.99607	9.95895	9.91761	9.94023
1D	AT1G34050_39974	5.70206	6.00197	6.23394	6.44786	6.65083	5.6626	5.68889	5.60169	5.32565	5.41221	5.5072	5.57582	6.07779	6.51737	7.14205	5.22284	6.12511	6.17277	4.88295	4.57533	5.84836	5.92515	7.34397	7.10637	5.49607	5.19067	5.70065
1D	AT2G43200_40415	7.04023	6.80686	6.77869	6.81951	6.79927	7.15184	6.79068	6.94648	7.17509	7.25741	7.24099	7.34377	7.13171	6.75941	7.25485	7.23993	7.02147	7.16802	7.18424	7.31265	6.92721	6.80228	6.68389	6.76387	6.9304	7.07564	6.99789
1D	AT5G39960_40830	6.99902	6.97021	7.00997	7.01477	7.01396	7.06735	7.00025	6.82427	6.85384	6.81026	6.78139	6.77272	6.95002	7.04557	7.16164	6.99208	6.88371	6.86353	6.8868	6.94349	6.82149	6.8913	7.0108	7.03387	6.90089	6.9095	6.89948
1D	AT2G07718_40919	2.27707	2.40764	2.57549	2.30214	1.41079	2.15946	2.00254	1.88683	1.99466	2.57255	2.00254	2.33584	1.41079	1.97145	2.45184	1.46288	1.48485	2.15649	2.06103	2.35736	2.79733	1.93628	1.54822	1.27759	2.65506	1.67124	1.98811
1D	AT2G40510_41181	8.48077	8.3365	8.41117	8.44534	8.45036	8.35131	8.51146	8.35934	8.25738	8.38559	8.42111	8.22447	8.48561	8.59567	8.51137	8.50195	8.47963	8.50631	8.36869	8.27322	8.38422	8.48126	8.55122	8.5248	8.55366	8.55832	8.428
1D	AT1G11480_41530	8.85266	8.65903	8.69697	8.60999	8.5762	8.73438	8.81222	8.75102	8.71895	8.85376	8.69067	8.97659	8.58662	8.50711	8.39524	8.6734	8.75484	8.65121	8.70261	8.74274	8.66359	8.71125	8.44821	8.53906	8.73199	8.69605	8.74032
1D	AT1G15930_42029	11.0253	10.9976	11.0074	10.9861	10.9139	10.9747	11.1504	11.1225	11.0807	11.095	11.114	11.0399	10.8958	10.9083	10.9183	11.0807	10.9262	10.9434	11.1414	11.1601	11.0435	10.9634	10.8701	10.9241	10.9729	10.9286	10.905
1D	AT4G30680_42542	6.27794	6.31982	6.35471	6.50804	6.44668	6.57099	6.81669	6.28992	6.2578	6.18474	6.29722	6.05867	6.40676	6.43024	6.42213	6.63019	6.19698	6.2285	6.27356	6.31499	6.15077	6.2342	6.38253	6.48581	6.13957	6.31157	6.27214
1D	AT1G31300_42780	8.2467	8.25312	8.26729	8.08073	8.01526	8.02619	8.1056	8.16415	8.13033	8.13296	8.06835	8.13285	8.04689	8.0042	7.96423	8.00332	8.11528	8.12449	8.06331	7.9782	8.10882	8.14358	7.97881	7.99925	8.21466	8.19253	8.13242
1D	AT3G20230_43024	6.46169	6.51529	6.38315	6.38021	6.41201	6.3664	6.29893	6.63763	6.46333	6.70229	6.61332	6.61196	6.53006	6.423	6.29892	6.33006	6.54209	6.55424	6.52702	6.57696	6.6128	6.43048	6.49045	6.43748	6.4086	6.40745	6.5577
1D	AT3G58700_43044	9.11754	8.9994	9.06254	9.19682	9.20989	9.19632	9.13847	9.06855	9.07649	9.03745	9.15671	9.00345	9.15926	9.21284	9.16467	9.21034	9.07282	9.10616	9.08986	9.05169	9.01333	9.00611	9.06144	9.13964	9.07887	9.13419	9.12081
1D	AT5G46160_43132	8.551	8.31988	8.42428	8.55264	8.63731	8.52849	8.46948	8.5088	8.35249	8.30238	8.34268	8.25097	8.49307	8.5524	8.36788	8.45612	8.44536	8.54285	8.34723	8.31806	8.23872	8.50629	8.52795	8.6012	8.41262	8.48876	8.41841
1D	AT2G32060_43300	9.87861	9.7555	9.84478	9.99385	9.91072	9.95796	10.0103	9.84058	9.71536	9.73972	9.84694	9.6693	9.84501	9.8939	9.93953	9.94844	9.80607	9.87676	9.81704	9.78237	9.74022	9.88805	9.98672	9.99938	9.93884	9.94608	9.80483
1D	AT3G10090_43417	8.75959	8.75244	8.74365	8.76839	8.84044	8.73145	8.82999	8.7269	8.65493	8.64468	8.7438	8.59711	8.82878	8.84695	8.88029	8.81244	8.83135	8.81507	8.77457	8.74648	8.73145	8.75142	8.90383	8.86663	8.78484	8.81484	8.78814
1D	AT5G39960_43812	5.70156	5.64626	5.69098	5.77509	5.66284	5.77285	5.67746	5.49855	5.503	5.5137	5.57509	5.44408	5.8672	5.85906	5.90378	5.73306	5.54308	5.48331	5.54713	5.54769	5.49184	5.5807	5.70156	5.75913	5.51519	5.5462	5.49855
1D	AT1G06200_44192	8.5711	8.59599	8.48314	8.38074	8.42299	8.58681	8.61116	8.60014	8.66063	8.80528	8.77024	8.8668	8.33986	8.31759	8.37504	8.59783	8.44107	8.32518	8.76995	8.87883	8.58932	8.65544	8.29965	8.31132	8.5168	8.48853	8.3407
1D	AT3G11964_44262	7.82424	7.6222	7.60286	7.90957	7.90125	7.95508	7.93749	7.47263	7.50228	7.42932	7.4489	7.36885	7.95152	7.97668	7.94691	7.76226	7.74248	7.72582	7.69059	7.60051	7.49773	7.6134	7.95042	7.93299	7.61006	7.7503	7.8354
1D	AT4G32960_44469	5.9166	5.89609	5.95341	5.88903	5.79859	5.93246	5.99213	5.94006	6.01203	6.04769	6.03048	6.17323	5.97827	5.95164	6.00962	5.94614	5.97435	5.83703	6.09582	6.09659	6.09483	5.79177	5.79057	5.80617	5.84372	5.7961	5.84337
1D	AT5G38720_44519	7.95558	7.81971	7.86473	8.15971	8.09515	8.14901	8.15315	7.77987	7.83117	7.71283	7.81004	7.77234	8.17056	8.18893	8.20402	7.96779	8.01701	7.99232	7.94008	7.7765	7.78045	7.92484	8.22001	8.11821	7.8908	7.97428	7.99751
1D	AT2G32220_44656	7.9913	8.04263	8.0557	8.20265	8.08941	8.02853	7.93996	7.89946	7.90683	7.92383	8.11934	7.82738	8.23974	8.27855	8.57262	8.26863	8.00967	8.14252	8.12011	8.17917	8.0825	8.06555	8.41593	8.40104	8.05894	8.10912	8.04554
1D	AT1G13930_44732	12.2389	12.1551	12.1574	11.8856	11.9234	12.1095	11.9106	12.2272	12.1825	12.1931	12.1551	12.1574	11.8	11.8174	11.7191	11.9933	12.1578	12.1551	12.1574	12.2544	12.2269	12.1711	11.7357	11.7841	12.0448	11.9278	12.0796
1D	AT1G77030_44764	6.49973	6.35929	6.48604	6.64035	6.55185	6.69848	6.66249	6.26751	6.25141	6.32353	6.44368	6.19683	6.53461	6.55899	6.6584	6.57768	6.33973	6.45877	6.45291	6.56463	6.24924	6.25876	6.56241	6.55487	6.20789	6.29309	6.32152
1D	AT5G56670_44820	9.54776	9.40872	9.42988	9.51544	9.63526	9.46622	9.39005	9.49083	9.40914	9.27755	9.39697	9.28194	9.42916	9.49413	9.46264	9.53567	9.40367	9.51091	9.37319	9.38659	9.40206	9.46569	9.58185	9.54064	9.57026	9.5962	9.59801
1D	AT4G20980_44864	8.75404	8.72252	8.72917	8.76699	8.69839	8.83199	8.75566	8.5512	8.73353	8.6183	8.63107	8.71595	8.89652	8.89569	8.90977	8.84341	8.825	8.66421	8.64547	8.58693	8.64741	8.66589	8.69108	8.76091	8.70252	8.66913	8.71259
1D	AT2G44065_44948	8.44532	8.46913	8.44369	8.38812	8.31433	8.43289	8.4679	8.43346	8.50702	8.38354	8.48148	8.44369	8.26625	8.27335	8.35933	8.43627	8.37508	8.19373	8.51158	8.56346	8.49399	8.49686	8.31025	8.25889	8.43239	8.39674	8.31085
1D	AT1G16810_44975	9.20856	9.18627	9.22714	9.14126	9.22318	9.19955	9.21333	9.4193	9.43633	9.41978	9.32434	9.41328	9.10773	9.02637	9.14788	9.24097	9.27121	9.27443	9.39477	9.33297	9.4003	9.28895	9.1444	9.10461	9.25947	9.29496	9.3461
1D	AT3G04840_45097	11.3681	11.1915	11.1927	11.3495	11.2402	11.2788	11.1915	11.1348	11.0853	11.1013	11.1386	11.1171	11.353	11.2683	11.3303	11.2122	11.1911	11.2514	11.0907	11.0509	11.0617	11.183	11.2357	11.2992	11.2214	11.2153	11.1991
1D	AT1G73980_45122	8.04526	7.96567	7.96945	7.76318	7.79633	7.69437	7.65034	7.95215	7.87679	8.0218	7.9319	8.00224	7.84365	7.79355	7.79902	7.81718	8.0628	7.95008	7.80126	7.74109	8.03373	7.85201	7.71609	7.67675	7.97709	7.93429	7.88333
1D	RPL10B_1121	7.49115	7.53153	7.64143	7.69872	7.56982	7.63096	7.54532	7.4308	7.48233	7.41121	7.63746	7.31276	7.73628	7.72461	7.75301	7.78745	7.54732	7.64631	7.49208	7.51967	7.55085	7.53303	7.78518	7.74479	7.6815	7.66792	7.57621
1D	RPL18AA_2752	9.29261	9.25241	9.34576	9.42714	9.26096	9.29667	9.14318	9.14037	9.09101	9.17295	9.29859	9.12903	9.52436	9.37967	9.60854	9.31924	9.2137	9.46813	9.15461	9.22624	9.21231	9.31224	9.5604	9.44385	9.28128	9.4357	9.25477
1D	RPL18AA_11305	8.56077	8.48005	8.63282	8.75132	8.62822	8.65008	8.39366	8.52982	8.47087	8.44775	8.69952	8.38165	8.80798	8.84471	8.93437	8.68618	8.54729	8.73899	8.53814	8.38832	8.48343	8.5493	8.83608	8.79574	8.60607	8.7009	8.58409
1D	RPL12-C_12497	7.61271	7.61572	7.53672	7.43303	7.42435	7.32503	7.37793	7.6295	7.67894	7.81782	7.77637	7.74912	7.64084	7.57656	7.30271	7.38562	7.64316	7.66502	7.57402	7.65158	7.6511	7.55431	7.25583	7.5419	7.47439	7.42464	7.48977
1D	RPL5B_12869	9.83178	9.86334	9.8619	9.87848	9.98286	9.91715	9.93163	9.92858	10.022	9.81047	9.92809	9.79415	10.0342	10.0712	10.059	10.018	9.84354	9.84543	9.92978	9.94362	9.98164	9.9891	10.0319	9.91475	9.9637	9.98846	9.97424
1D	RPL12-A_17672	9.50254	9.71064	9.60443	9.40666	9.46559	9.34585	9.35236	9.70894	9.81961	9.94335	9.77037	9.91811	9.57242	9.36252	9.28199	9.38448	9.46646	9.50379	9.66331	9.66931	9.79203	9.55815	9.25873	9.32486	9.47688	9.47791	9.41529
1D	RPL24A_21741	10.3434	10.4213	10.4824	10.5243	10.6459	10.4745	10.3629	10.3463	10.2798	10.4119	10.3274	10.279	10.4304	10.5525	10.5706	10.5044	10.4061	10.5598	10.3571	10.394	10.2861	10.4637	10.5708	10.5488	10.451	10.5285	10.444
1D	RPL24A_23177	8.85602	8.79727	8.92328	9.06096	9.10977	8.85834	8.76229	8.80377	8.64837	8.68882	8.95153	8.61981	9.04138	9.11716	9.00615	9.02139	8.9484	9.05175	8.78129	8.67601	8.85094	8.85305	9.09692	9.06456	8.96149	9.02437	8.97766
1D	RPL4_28501	7.62135	7.98953	7.64822	7.45627	7.76794	7.42733	7.59541	7.93443	7.86079	7.97719	7.82677	7.90383	7.62987	7.62777	7.26828	7.39077	7.82498	7.72249	7.88517	8.00829	7.95974	7.67325	7.58953	7.57174	7.59779	7.69138	7.76068
1D	RPL27_36138	8.52132	8.40139	8.28101	8.33952	8.36293	8.37169	8.36449	8.55968	8.59529	8.62576	8.51269	8.60478	8.37537	8.39312	8.27884	8.41142	8.4713	8.4834	8.59647	8.56121	8.38581	8.3773	8.27201	8.37656	8.52983	8.53822	8.3608
1D	RPL18AA_37630	7.40681	7.38251	7.4903	7.60297	7.5912	7.48305	7.36069	7.32196	7.35007	7.30058	7.55367	7.33508	7.76959	7.75832	7.8736	7.65982	7.53822	7.62754	7.42055	7.24162	7.41544	7.55458	7.86494	7.75957	7.57193	7.61784	7.56663
1D	RPL27AB_38288	7.52847	7.39379	7.48337	7.64746	7.6672	7.51918	7.4965	7.44842	7.38988	7.46379	7.60594	7.3202	7.62291	7.77605	7.95988	7.71899	7.5839	7.76403	7.57799	7.5138	7.57971	7.73589	7.96491	7.86808	7.80819	7.79982	7.65492
1D	RPL12-A_41578	7.9027	8.33555	8.13274	8.00163	8.0774	7.88301	7.8714	8.26905	8.38019	8.45695	8.42865	8.46354	8.23628	8.13716	8.01183	8.0222	8.01173	8.16144	8.24315	8.35672	8.42774	8.20985	8.12808	8.02843	8.0708	8.10768	8.08999
1D	RPL4_44130	7.90615	8.19825	7.94951	7.79996	7.95547	7.62834	7.81928	8.14981	8.06361	8.23953	8.18216	8.20227	7.85589	7.85533	7.53784	7.62643	8.05593	7.95611	8.10031	8.22768	8.19945	7.8886	7.80619	7.80897	7.89019	7.90414	8.02032
7D	AT1G76820_400	4.72462	4.8797	5.35124	4.77548	5.12016	5.30549	5.40512	5.33253	5.37021	5.24733	4.79299	5.41594	4.84816	4.67379	5.05933	5.38046	5.39227	5.3943	4.84075	4.73833	5.07001	4.721	4.83078	4.83194	5.04157	4.86635	5.2962
7D	AT2G05220_835	9.9638	10.0829	10.084	9.93926	9.95556	9.89854	9.8091	9.85983	9.7516	10.0169	9.99346	9.89342	9.9849	9.98148	10.0378	9.95149	9.87865	9.90327	9.88795	9.92234	9.96797	9.88447	9.92676	9.92348	9.90282	9.88899	9.93715
7D	AT3G59540_2580	10.7108	10.625	10.6425	10.7292	10.6489	10.7773	10.8772	10.7645	10.7852	10.637	10.6938	10.6825	10.7239	10.66	10.6868	10.8149	10.8253	10.8318	10.6772	10.6806	10.6118	10.6802	10.5875	10.7616	10.7846	10.8291	10.7384
7D	AT1G56080_3000	7.19071	7.16433	7.14355	7.20609	7.17314	7.19969	7.28412	7.17773	7.22055	7.17297	7.20601	7.2319	7.23103	7.22541	7.25557	7.26028	7.26945	7.27869	7.2372	7.20477	7.14208	7.28022	7.15198	7.20325	7.35283	7.29944	7.24103
7D	AT2G42710_3104	7.64678	7.82501	7.82042	7.76625	7.74731	7.78444	7.53626	7.59231	7.53968	7.71661	7.8064	7.60641	7.80401	7.89067	8.04552	7.79746	7.49953	7.63086	7.71497	7.86059	7.81609	7.68308	7.94205	7.80405	7.59067	7.62889	7.65076
7D	AT4G26190_4027	8.15202	8.2269	8.13345	8.11871	8.08008	8.13101	8.07386	8.0253	8.11294	8.22	8.12833	8.21903	8.12556	8.09366	8.13382	8.01354	8.03274	8.03447	8.11236	8.19907	8.16786	8.0253	8.15453	8.11236	7.9698	8.06403	8.14462
7D	AT2G05220_5161	9.96065	10.004	9.9947	9.95168	9.95444	9.79278	9.71634	9.80461	9.72062	9.9311	9.93753	9.76964	9.98139	9.94269	9.91983	9.89144	9.82332	9.83251	9.85851	9.91745	9.97741	9.91115	9.91248	9.91801	9.79897	9.89798	9.94022
7D	AT1G05640_5438	5.91695	6.03237	5.99542	5.76727	5.85033	5.53175	5.43137	5.67258	5.5446	5.84228	5.80069	5.6705	5.60942	5.62177	5.49148	5.50045	5.68496	5.80069	5.73016	5.96882	6.0861	5.77553	5.91151	5.86916	5.53029	5.7043	5.93861
7D	AT3G52440_5828	4.03756	3.9451	4.03489	4.04602	4.0179	4.05221	4.13012	4.22917	4.53648	4.11799	4.14252	4.29719	4.10673	4.13806	4.22917	4.26567	4.34385	4.36483	4.05467	3.96017	4.1536	4.22917	4.19784	4.09	4.38325	4.47237	4.26534
7D	AT4G02930_6056	8.93281	9.03674	9.0526	8.91827	8.92769	8.98621	8.70037	8.63264	8.65311	8.91163	8.94471	8.71353	8.91931	8.97586	9.0114	8.75618	8.74168	8.74415	8.90396	9.05057	8.90954	8.93773	8.88928	8.87285	8.64808	8.71716	8.74422
7D	AT1G10300_6123	3.93932	4.44153	4.44413	4.34184	4.38652	4.44067	4.39235	3.96656	3.75263	3.84657	3.99844	3.76401	4.06398	3.96098	3.73835	3.7449	3.32638	3.2133	4.18435	4.5279	4.50529	4.20927	4.51904	3.89577	3.34236	3.72547	3.86536
7D	AT5G53850_6716	6.34954	6.2571	6.31006	6.35397	6.27942	6.28703	6.69901	6.35196	6.39688	6.3049	6.25233	6.39125	6.34774	6.54153	6.21357	6.37376	6.55104	6.34446	6.30237	6.24936	6.29285	6.32145	6.43853	6.51037	6.43411	6.35283	6.63945
7D	AT4G26310_8140	7.70842	7.65594	7.58006	7.67743	7.53978	7.64563	7.62592	7.50629	7.58356	7.6529	7.64974	7.65617	7.62637	7.65649	7.65145	7.58174	7.53598	7.55133	7.73758	7.71339	7.65489	7.66627	7.55748	7.58356	7.56846	7.52976	7.60449
7D	AT2G05830_8597	9.44082	9.21313	9.29844	9.17219	9.31974	9.21563	9.43112	9.46206	9.45232	9.2869	9.10858	9.23083	9.10168	9.29409	9.03655	9.16903	9.64307	9.5829	9.13041	9.06478	9.04877	9.25309	9.30168	9.52175	9.48206	9.4522	9.68947
7D	AT1G26940_8981	7.57684	7.5114	7.44156	7.49944	7.63096	7.47308	7.70249	7.66485	7.72422	7.57706	7.61988	7.48755	7.57574	7.54113	7.42492	7.62065	7.65137	7.65382	7.61158	7.47114	7.4488	7.73003	7.60226	7.61077	7.7821	7.75737	7.67796
7D	AT1G64150_9564	3.7371	3.54464	3.57374	3.7641	3.48893	3.79572	3.95681	4.01649	4.03318	3.40899	3.49263	3.86173	3.75571	3.79572	3.63867	3.77406	3.8576	3.79003	3.84326	3.52942	3.39732	3.47667	3.30479	3.35356	3.94332	3.71074	3.61559
7D	AT3G18760_9939	8.81875	9.01181	9.02485	8.85436	8.81052	8.92879	8.51102	8.68242	8.54505	8.78462	8.87232	8.51702	8.6793	8.55125	8.95263	8.60931	8.52116	8.6047	8.81127	9.05444	8.97287	8.68981	8.87854	8.82236	8.55896	8.60579	8.63887
7D	AT5G42570_10684	9.68963	9.77389	9.80807	9.74398	9.61846	9.87478	10.054	9.93255	9.93205	9.63568	9.53773	9.79684	9.68262	9.68874	9.52744	9.80881	10.0126	9.9385	9.6347	9.55836	9.59134	9.71819	9.57632	9.73015	9.90146	9.73763	9.86781
7D	AT1G76185_10756	6.80338	6.60606	6.69653	6.80343	6.82881	6.80173	6.91535	6.91977	6.99719	6.8827	6.79307	6.98068	6.79639	6.71967	6.74309	6.97746	6.91694	6.99026	6.75032	6.73969	6.64506	6.95079	6.82582	6.85845	7.03242	6.98407	6.97899
7D	AT1G26940_10882	7.91654	7.69228	7.73377	7.72795	7.83851	7.73961	7.89088	7.89041	7.86228	7.74031	7.74574	7.63337	7.72544	7.88789	7.53252	7.76609	7.9826	7.98542	7.72417	7.63004	7.65178	7.91732	7.7149	7.92706	7.99802	7.96937	7.95114
7D	AT4G37020_11203	7.65831	7.5475	7.4897	7.68104	7.65167	7.63195	7.84852	7.83208	7.80316	7.54282	7.506	7.54124	7.43986	7.48094	7.45342	7.67762	7.74688	7.74329	7.7287	7.67301	7.57329	7.71714	7.5533	7.7077	7.82019	7.79581	7.75418
7D	AT3G07920_11672	4.25627	3.88203	3.47051	3.96271	3.6601	4.19044	3.05003	3.10186	3.243	3.53957	4.11959	3.6298	3.8916	3.73336	4.05707	3.81148	3.07208	3.42265	4.4628	4.73343	3.99201	4.21963	3.64175	3.48435	3.13308	2.80107	2.87196
7D	AT1G64880_11974	9.25031	9.28101	9.34121	9.21328	9.27524	9.31338	9.10395	9.13899	8.99999	9.16533	9.14976	8.99327	9.17074	9.18191	9.32694	9.01332	8.97372	8.97061	9.09892	9.21562	9.23194	9.06084	9.19801	9.16619	8.91606	8.94293	9.02204
7D	AT4G27880_12373	7.58207	7.45807	7.37695	7.52108	7.43233	7.4957	7.6918	7.58081	7.65202	7.51703	7.45029	7.62987	7.42015	7.43917	7.36004	7.54441	7.63035	7.60508	7.51645	7.56184	7.44554	7.56098	7.43761	7.50323	7.68669	7.64209	7.64087
7D	AT1G16870_12813	8.40277	8.54224	8.4212	8.38338	8.44201	8.46276	8.30458	8.40546	8.32686	8.43787	8.45215	8.42273	8.38095	8.44752	8.56792	8.37275	8.30688	8.37319	8.44929	8.50999	8.44187	8.3673	8.45853	8.35118	8.34728	8.36843	8.37852
7D	AT1G09410_13983	3.75564	4.05423	3.99615	3.79954	3.99679	4.25375	3.66545	3.80736	4.00782	4.04208	4.01306	4.06831	4.12623	3.94515	4.45675	3.90285	3.77523	3.77219	4.09729	4.31034	4.02492	3.88017	4.02636	3.72749	3.66841	3.89711	3.88017
7D	AT2G42710_14530	8.00651	8.04501	8.08876	8.00783	8.06611	8.11287	7.95139	7.81725	7.83261	8.07813	8.12068	7.814	8.02337	8.0641	8.26515	8.01031	7.76776	7.81067	8.08333	8.11642	8.0792	7.97818	8.1997	8.08468	7.90821	7.86633	7.96103
7D	AT5G64670_14600	8.78359	8.94615	8.9429	8.73169	8.78438	8.94655	8.71683	8.78832	8.7785	8.8984	8.8829	8.77167	8.8475	8.87592	8.96435	8.76367	8.76471	8.80701	8.95897	8.98889	8.84783	8.88356	8.91921	8.77167	8.72983	8.79213	8.74653
7D	AT1G77500_15988	7.87734	8.20562	8.15439	8.07041	7.81174	7.61088	7.61024	7.6043	7.68656	7.89335	7.88876	8.03543	7.96056	7.98832	8.29749	7.68791	7.78675	7.6946	7.75918	7.99454	7.92102	7.91029	8.11973	7.8685	7.64244	7.6866	7.63834
7D	AT1G70600_16128	11.5456	11.6026	11.5633	11.4966	11.5972	11.562	11.474	11.5024	11.4722	11.6222	11.5649	11.5291	11.5381	11.5447	11.6175	11.5949	11.5334	11.5305	11.5521	11.5491	11.5308	11.5452	11.4991	11.5291	11.4571	11.5191	11.4596
7D	AT1G80810_16678	3.95345	3.74306	3.97332	3.98245	4.00301	3.99692	4.12709	4.06432	3.85737	3.55777	3.48336	3.69532	3.74584	3.68251	3.43357	3.73107	3.93723	3.98994	3.73566	3.56916	3.51426	3.69927	3.55641	3.65792	3.84459	3.95731	3.73907
7D	AT2G11910_17125	9.48734	9.82649	9.82964	9.42776	9.61954	9.30701	9.41687	9.5636	9.49716	9.71015	9.66359	9.51432	9.59287	9.53716	9.31731	9.25951	9.49727	9.42039	9.62948	9.66923	9.85028	9.63238	9.75406	9.57904	9.39031	9.52129	9.65917
7D	AT1G33970_17614	8.77971	8.53147	8.70358	8.89142	8.79847	8.79211	8.97981	9.11518	9.16543	8.83916	8.77404	9.19649	8.98349	8.96768	8.70468	8.84012	9.19044	9.23991	8.76792	8.54114	8.66679	8.99358	8.8941	8.95462	9.11852	9.03568	9.08848
7D	AT4G31420_18008	7.52843	7.34788	7.64598	8.1453	8.14174	8.2449	8.16791	8.08308	7.80573	4.0068	3.66633	3.83753	3.32339	3.45876	3.2061	3.62131	4.14551	4.01916	5.64073	5.24371	5.12939	5.44664	4.84446	5.34278	5.58791	5.55113	5.58955
7D	AT5G42570_18485	9.43244	9.50246	9.64209	9.48381	9.44054	9.53068	9.82233	9.7098	9.67361	9.45824	9.36493	9.51154	9.47288	9.55082	9.31913	9.53118	9.70921	9.63814	9.42436	9.27224	9.46794	9.5913	9.40934	9.54326	9.68411	9.54249	9.59691
7D	AT5G46430_18577	9.61033	9.45708	9.57627	9.60976	9.71771	9.63122	9.59204	9.78531	9.72521	9.47132	9.53987	9.56046	9.6767	9.55978	9.4639	9.59646	9.76081	9.77701	9.50152	9.3846	9.59494	9.59362	9.60002	9.62437	9.64935	9.6999	9.76259
7D	AT5G56940_18607	8.26885	8.46482	8.4436	8.35687	8.40703	8.29049	8.30758	8.4016	8.28389	8.47986	8.44118	8.35802	8.33785	8.34564	8.34174	8.45805	8.21262	8.30758	8.48595	8.50602	8.57063	8.3642	8.46212	8.34348	8.31048	8.36773	8.42372
7D	AT2G07732_19410	3.48081	3.46551	3.57723	3.40889	3.27867	3.43054	3.26252	3.09571	3.40298	3.49054	3.14451	3.32455	3.36633	3.30237	3.28589	3.17775	2.89396	2.87442	3.35856	3.4352	3.19334	3.38182	3.31333	3.09269	2.86838	2.99507	3.1589
7D	AT3G23390_19745	4.74949	4.65732	4.73834	4.83892	4.75074	4.83752	5.0965	4.72219	4.90921	4.85417	5.03216	5.03198	4.77174	4.82081	5.03425	5.07102	4.96668	4.98979	4.8001	4.88083	4.90125	5.00074	4.99626	5.08734	5.2185	5.19788	5.02756
7D	AT2G07773_19866	4.12145	4.26049	3.98736	4.19747	4.14943	4.15077	3.62869	3.77267	4.10206	4.28912	4.13712	4.38012	3.98641	4.0882	4.2658	4.13888	3.69491	4.01625	4.30012	4.37538	3.71025	4.16665	3.8815	3.88646	3.43606	3.56581	3.77267
7D	AT1G01500_20025	3.23149	3.13107	3.0389	3.1989	3.46655	3.17688	3.60459	3.58249	3.30816	3.44071	3.10672	3.40792	3.21277	3.45313	3.38967	3.09736	3.50975	3.59157	3.21232	2.75345	3.02375	3.24809	3.29698	3.50971	3.32437	3.40429	3.22873
7D	AT1G10350_21021	7.00758	6.83844	6.88398	6.81582	6.78597	6.84865	7.0565	7.09884	7.06174	6.92124	6.85869	6.96756	6.87051	6.77177	6.75194	6.83849	7.05923	6.98251	6.68339	6.68139	6.8058	6.89412	6.73887	6.8825	7.06737	7.0292	6.84918
7D	AT5G11780_21314	5.10316	5.56574	5.52803	5.15331	5.34127	5.10303	4.91133	5.11177	5.03983	5.37117	5.34028	5.14484	5.16268	5.20182	5.48205	5.29473	5.15331	5.17662	5.42585	5.65244	5.42523	5.01154	5.40345	5.00683	4.98962	5.14167	5.366
7D	AT5G63550_21667	7.64333	7.7408	7.70658	7.65436	7.70056	7.65499	7.41698	7.43864	7.42246	7.58142	7.52203	7.5845	7.53665	7.57275	7.62428	7.48191	7.52285	7.5403	7.60724	7.53298	7.51813	7.47154	7.51629	7.4334	7.43394	7.48222	7.54172
7D	AT1G70190_22166	7.87191	8.19331	8.13818	7.96711	8.08439	7.92983	7.86607	7.99161	7.95122	8.16287	8.07176	7.99364	7.98089	8.0639	8.16012	8.10133	7.86164	7.9558	8.17019	8.27431	8.16039	8.0709	8.20422	7.96664	7.94441	8.07038	8.00067
7D	AT2G45990_22483	7.54555	7.40791	7.41816	7.49109	7.46979	7.48701	7.58546	7.59201	7.57714	7.44165	7.43007	7.55396	7.54487	7.54278	7.49765	7.55594	7.61252	7.4955	7.46931	7.35687	7.43912	7.48385	7.40682	7.50185	7.58509	7.53589	7.54883
7D	AT5G64650_22613	6.20421	6.44391	6.44204	6.39605	6.24538	6.34414	6.32739	6.19233	6.23839	6.34306	6.4995	6.31001	6.32543	6.35425	6.42376	6.38657	6.12314	6.14298	6.57004	6.63814	6.54976	6.35248	6.34303	6.18862	6.22396	6.17798	6.21643
7D	AT1G54217_24256	5.41604	5.56354	5.65413	5.41028	5.50956	5.55212	5.70612	5.59145	5.63151	5.51467	5.46321	5.38308	5.4288	5.50935	5.39393	5.51336	5.74329	5.79012	5.40901	5.40269	5.51691	5.69181	5.75336	5.68152	5.7037	5.60953	5.79465
7D	AT2G45990_25476	7.93128	7.86001	7.8579	8.00043	7.9616	7.90129	8.01346	8.03991	8.08024	7.91357	7.90626	8.05444	7.84413	7.99652	7.92775	8.01176	8.07273	8.12589	7.92581	7.85565	7.865	7.9831	7.99255	7.9881	8.08905	8.0858	7.9831
7D	AT1G25141_26643	3.84896	3.99729	4.47826	3.37576	3.76353	3.77804	4.51529	4.32191	4.5038	3.99471	3.53867	3.86132	3.68986	3.35775	2.95614	3.9613	4.42402	4.30667	3.54057	3.39421	3.71621	3.73533	3.38136	3.52363	4.30168	4.27686	4.46751
7D	AT5G15220_26839	7.85949	7.83483	7.85779	7.78003	7.85682	7.68998	7.70305	7.85493	7.66495	7.83606	7.88865	7.68664	7.68846	7.75726	7.63315	7.63387	7.62388	7.67102	7.77702	7.77227	7.89209	7.80909	7.83072	7.75854	7.80362	7.75983	7.71605
7D	AT2G15560_27227	7.87001	7.90318	7.91245	7.76766	7.86065	7.91983	7.96682	7.92837	7.93958	7.87284	7.72332	7.95293	7.80821	7.87348	7.80686	7.94931	8.01017	8.02235	7.84379	7.88722	7.83181	7.91485	7.81493	7.86709	7.96487	7.91369	8.00053
7D	AT1G30670_28193	0.637504	0.526172	0.770265	0.442077	0.462179	0.612938	0.526172	0.37803	0.637504	0.43343	0.526172	0.735405	0.580552	0.935699	0.37803	0.657804	2.39544	2.05072	0.760706	0.485285	0.426747	1.54874	1.07271	0.779823	2.4647	1.63674	1.74583
7D	AT4G00750_28226	4.17046	4.47934	4.43035	4.22564	4.13773	4.16628	3.67476	3.93509	3.87455	3.93519	4.23559	4.06062	4.18445	4.15295	3.96117	3.9693	3.91215	3.98363	4.27879	4.66397	4.48621	4.16261	4.36216	4.06062	3.81266	3.85663	4.14925
7D	AT2G40290_28683	9.71782	9.65454	9.66033	9.57064	9.70232	9.54749	9.61879	9.60758	9.6262	9.65379	9.56594	9.61685	9.59965	9.62184	9.68378	9.57983	9.5953	9.58621	9.61418	9.67882	9.61628	9.64511	9.58432	9.58094	9.5814	9.58278	9.56361
7D	AT1G47970_29202	8.00853	7.84998	8.02433	8.13319	8.22579	8.15258	8.29237	8.25737	8.26464	7.86525	7.94229	8.05562	8.12196	7.84277	7.74516	7.99447	8.32372	8.13057	7.8718	7.7816	7.89529	8.0461	8.01289	8.15081	8.12728	8.2249	8.30466
7D	AT4G33865_29657	10.4627	10.5138	10.4876	10.4608	10.4629	10.4497	10.5769	10.5534	10.5401	10.5257	10.4773	10.5771	10.5331	10.5973	10.5534	10.6089	10.676	10.698	10.548	10.6306	10.6434	10.7129	10.7703	10.732	10.7042	10.6853	10.6528
7D	AT1G33970_31380	7.91776	7.41322	7.54156	7.83493	7.73049	7.61647	7.87663	7.99699	7.96811	7.69517	7.74798	7.98396	7.92481	7.97182	7.75271	7.82205	8.14939	8.09319	7.69819	7.48881	7.64637	7.80907	7.73648	7.8427	7.98433	7.96083	7.97233
7D	AT5G15220_31560	6.42044	6.44332	6.43031	6.34303	6.48966	6.33483	6.26289	6.28794	6.08524	6.31043	6.43367	6.08316	6.13713	6.24545	6.15933	6.15218	6.20855	6.19488	6.33636	6.36745	6.37205	6.32504	6.31296	6.29013	6.22083	6.19131	6.15706
7D	AT1G20990_31605	5.14397	5.10433	5.00296	5.44747	5.03283	5.05978	5.46919	5.66057	5.84606	4.92508	4.65126	5.33873	5.4884	5.74313	4.73539	5.16777	5.89143	5.89097	5.23805	4.83185	4.64247	5.33303	5.13739	5.37809	5.79855	5.69582	5.87477
7D	AT1G09820_32203	5.64898	5.59849	5.53304	5.53222	5.60629	5.57465	5.43148	5.545	5.57191	5.65455	5.62467	5.62349	5.62314	5.71597	5.67857	5.60945	5.50908	5.54242	5.56212	5.55905	5.58587	5.545	5.50495	5.64698	5.42941	5.52476	5.52452
7D	AT4G36420_32430	7.95004	8.11627	8.13235	8.0521	8.1985	8.10336	7.89776	7.97703	7.99686	8.1642	8.18325	7.95374	8.09433	8.1334	8.21545	8.05208	7.95614	8.04574	8.1195	8.22445	8.23633	8.0822	8.23416	8.14834	7.97065	8.06323	8.12923
7D	AT1G66070_32988	8.85475	8.95539	8.96485	8.87494	8.78091	8.81612	8.81554	8.73163	8.76121	8.98075	8.90902	9.03984	8.8914	8.93733	9.04525	8.81095	8.739	8.85994	8.82185	8.8914	8.93733	8.81361	8.94082	8.85272	8.83209	8.78318	8.77098
7D	AT3G01170_33297	7.27209	7.14271	7.20131	7.34225	7.42162	7.51773	7.64078	7.62682	7.68992	7.38556	7.34624	7.60541	7.38826	7.44077	7.32124	7.67119	7.55381	7.53324	7.30048	7.19896	7.21945	7.62682	7.45345	7.40696	7.69561	7.56542	7.55175
7D	AT3G02860_35335	5.96878	5.8158	5.81258	6.0381	5.96303	6.22443	6.31174	6.2298	6.11556	5.92132	5.94644	6.05642	5.96923	6.06403	5.82316	6.27797	6.14888	6.02804	6.0332	5.82926	5.83997	6.06318	5.91867	5.99966	6.14384	5.931	6.01292
7D	AT5G56940_35857	8.45386	8.60922	8.60199	8.46673	8.49674	8.4097	8.4028	8.4845	8.42399	8.58097	8.61883	8.43337	8.41214	8.52063	8.57285	8.50996	8.36971	8.45529	8.58078	8.60208	8.71295	8.44965	8.5785	8.53584	8.52153	8.52611	8.53225
7D	AT5G64320_35859	6.49213	6.67717	6.5808	6.57811	6.58114	6.69907	6.45948	6.56752	6.59508	6.65612	6.58531	6.71235	6.60771	6.5952	6.75253	6.66147	6.41365	6.55517	6.66825	6.69391	6.66464	6.60038	6.5654	6.52318	6.41819	6.44887	6.44216
7D	AT4G37020_36491	6.88708	6.80009	6.89379	6.9164	6.92016	7.0113	7.13185	7.09198	7.05496	6.74906	6.76473	6.84918	6.72295	6.76806	6.731	7.05344	7.01753	6.89312	6.89875	6.86809	6.70144	6.93082	6.75584	6.78295	6.99628	6.94945	6.99838
7D	AT5G62300_36576	10.9732	10.9544	11.0119	10.9803	10.9875	11.008	11.0587	11.0318	11.0314	10.9075	10.9222	10.9447	10.9491	10.9475	10.9986	11.0404	10.9989	10.9737	10.9319	10.8713	10.886	10.9385	10.9047	10.9447	11.0124	10.9984	10.9462
7D	AT5G18790_36581	8.45166	8.67413	8.59625	8.28723	8.45892	8.32569	8.19941	8.22333	8.14428	8.55915	8.61313	8.22106	8.39745	8.44084	8.54589	8.3211	8.32862	8.38104	8.5526	8.74192	8.72674	8.44122	8.62962	8.56145	8.29239	8.40034	8.49646
7D	AT5G23535_37219	8.47779	8.61437	8.56894	8.53103	8.56293	8.51303	8.38645	8.32944	8.33166	8.46226	8.48523	8.32415	8.5112	8.55097	8.54227	8.31662	8.25609	8.25151	8.51905	8.52842	8.57478	8.33697	8.45449	8.43289	8.21403	8.30416	8.37448
7D	AT1G10350_37265	8.44223	8.24766	8.34723	8.27994	8.23814	8.24767	8.44915	8.48222	8.43555	8.31169	8.23572	8.36615	8.16076	8.25488	8.12739	8.22134	8.39499	8.39748	8.18125	8.16076	8.20734	8.3527	8.16604	8.27618	8.48889	8.43444	8.35059
7D	AT2G15560_37396	6.81495	6.69073	6.72515	6.70472	6.58378	6.74538	6.86617	6.80839	6.80757	6.7385	6.57457	6.75779	6.75449	6.81015	6.66153	6.72878	6.92458	6.82542	6.6639	6.68835	6.6403	6.69758	6.61897	6.80497	6.8095	6.73035	6.73739
7D	AT2G45990_38361	8.36696	8.24337	8.35778	8.31655	8.33101	8.31947	8.3805	8.47891	8.44039	8.35184	8.31857	8.44017	8.30254	8.35141	8.29538	8.40998	8.44485	8.45802	8.33124	8.27214	8.28176	8.41187	8.2895	8.33359	8.46449	8.47476	8.41187
7D	AT5G16140_38477	5.79929	5.85396	5.83395	5.87277	5.97117	5.91153	6.06831	6.02909	5.90176	5.86707	5.82837	5.95763	5.82289	5.77701	5.87993	5.99854	6.02101	5.92592	5.85895	5.67122	5.99297	5.83548	5.91909	5.97461	5.89038	5.88627	6.00904
7D	AT1G16870_39899	6.51578	6.54694	6.5031	6.61409	6.54366	6.42625	6.2909	6.37927	6.26506	6.4808	6.58269	6.39061	6.47649	6.63632	6.70025	6.41096	6.32491	6.2909	6.4846	6.49316	6.5975	6.32691	6.45144	6.42392	6.29593	6.37758	6.29416
7D	AT3G18880_40343	4.46515	5.09589	4.86029	4.53245	4.66444	4.57767	4.33491	4.53216	4.17655	4.70944	4.71196	4.21586	4.18935	4.56479	4.00892	4.00736	4.39319	4.35707	4.75321	4.83494	4.98876	4.83519	4.81552	4.70969	4.34346	4.31355	4.53216
7D	AT1G80810_43292	6.34881	6.25483	6.39617	6.29961	6.33774	6.42145	6.47111	6.35357	6.28959	6.14529	6.06975	6.2356	6.13557	6.24331	6.21693	6.39771	6.36372	6.35	6.17321	6.11399	6.0494	6.15295	6.11423	6.16462	6.40066	6.36145	6.32016
7D	AT1G16870_44042	8.3118	8.42025	8.38825	8.3024	8.39542	8.22157	8.14829	8.2225	8.15342	8.40955	8.37574	8.31969	8.29642	8.34864	8.49786	8.2615	8.20518	8.21473	8.32815	8.36674	8.4366	8.18389	8.33201	8.22197	8.18179	8.22603	8.27536
7D	AT5G04800_44396	10.1744	10.1866	10.1342	10.1643	10.1816	10.0829	10.0504	10.0401	10.0164	10.1463	10.1834	10.1219	10.1186	10.1627	10.2071	10.0848	10.0864	10.1106	10.1414	10.1682	10.1404	10.1275	10.1842	10.1821	10.1253	10.1504	10.1513
7D	AT1G34510_44638	6.1806	5.82445	4.62785	4.1666	4.51626	5.98312	3.64587	3.93319	4.44228	6.40255	6.56935	5.60298	6.77236	4.64361	6.07703	4.82747	3.58921	2.11939	5.67334	5.33873	4.5409	5.7099	2.86165	3.53897	4.4823	4.09865	2.39935
7D	RPL3B_30493	8.28895	8.61419	8.60591	8.47027	8.49732	8.2641	7.93033	8.07124	8.09357	7.64479	7.62461	7.51058	7.5338	7.7045	7.67977	7.45397	7.48662	7.59108	7.86985	8.05458	8.34865	7.66756	7.91809	7.96671	7.36982	7.43826	7.6928

## Sheet: 2C
Table S2C. Clusters of expression patters among significantly changed RPs during cold acclimation. RP transcripts of 60S LSU and 40S SSU subunits were clustered separately. The clusters of expression patterns of the subunits are not identical. A concatenated version of the N column “GeneName” and the B column “FeatureNum” from the files obtained from Atlas-biolabs was used as unique identifier.
Cluster_ID	Microarray_Gene_Probe_IDs	Subunit	WT_0D	WT_0D	WT_0D	WT_1D	WT_1D	WT_1D	WT_7D	WT_7D	WT_7D
40S LSU_1	AT1G59359_2067	40S	-0.380075	1.1599	1.51092	-0.266507	-0.509328	-0.403162	-0.947474	-0.800915	0.380465
40S LSU_1	AT1G59359_8242	40S	0.351844	0.952843	1.28387	0.0603717	-0.817758	1.1167	-1.18772	-0.561712	-0.64326
40S LSU_1	AT2G04390_17044	40S	0.229063	0.850091	1.45585	-0.237669	0.640734	-0.522692	-1.24392	-0.245497	-0.863116
40S LSU_1	AT2G05220_10601	40S	1.17609	1.70328	0.0235982	-0.341708	-0.299408	0.0693875	-0.712941	-0.836717	-0.669237
40S LSU_1	AT2G05220_26199	40S	0.557498	0.631355	1.11179	0.728577	0.414773	-0.471277	-1.45414	-0.345214	-0.842587
40S LSU_1	AT2G05220_5161	40S	0.998127	0.933745	1.00348	0.111647	0.633003	-1.07177	-1.07673	-0.590578	-0.897965
40S LSU_1	AT2G05220_835	40S	0.373673	1.33051	1.2543	-0.592021	-0.14434	-0.0801284	-0.592747	-0.439549	-1.22089
40S LSU_1	AT2G19750_3475	40S	0.895591	0.884428	0.559396	0.813304	0.687941	-1.48035	-0.936252	-0.342855	-1.19379
40S LSU_1	AT3G04230_27313	40S	-0.139708	0.990527	1.35266	-0.967805	0.198502	1.4192	-1.07589	-0.863269	-0.376183
40S LSU_1	AT3G09680_3339	40S	0.81526	0.440404	0.123815	-0.14889	1.07898	2.40641	-0.940322	-1.19078	-1.20327
40S LSU_1	AT3G10610_5695	40S	-0.67305	0.0703335	0.168753	1.62191	1.87563	-0.961447	-0.994571	-0.498456	-0.530543
40S LSU_1	AT3G53890_42890	40S	2.33363	0.623349	0.246116	-0.000963935	-0.0262635	-0.592273	0.0222448	-0.809186	-1.52775
40S LSU_1	AT4G29390_12769	40S	1.499	0.802283	1.28353	-0.749143	-0.0247757	-1.07737	-1.04884	-0.168938	-0.49114
40S LSU_1	AT4G30800_30172	40S	0.486561	1.01354	0.926906	0.443516	0.252458	0.4762	-0.757783	-1.20759	-1.22365
40S LSU_1	AT5G04800_44396	40S	1.35086	1.02934	-0.295595	0.496678	1.12821	-0.622773	-0.555202	-1.13714	-1.15143
40S LSU_1	AT5G15200_19543	40S	0.799826	1.11901	0.716186	0.349947	0.196189	-1.68516	-1.24027	-0.533463	0.0258891
40S LSU_1	AT5G16130_12967	40S	1.24302	0.159559	-0.0925523	1.62655	0.0366007	1.23397	-0.690176	-1.16756	-1.23579
40S LSU_1	AT5G59850_3838	40S	0.489665	0.243355	0.949012	0.367486	0.910374	0.348058	-1.36002	-1.51013	0.33941
40S LSU_1	AT5G59850_7861	40S	0.00254149	-0.218195	0.46988	1.15232	1.91401	0.170703	-0.884742	-1.28846	-0.603684
40S LSU_1	AT5G61170_13610	40S	0.608675	0.118794	0.70421	1.15957	0.724959	1.10503	-1.07806	-1.20492	-1.0827
40S LSU_1	AT5G61170_28718	40S	1.56139	1.04725	-0.0730583	0.886524	-0.0815675	-0.163745	-0.720343	-0.642641	-1.43202
40S LSU_2	AT1G15930_21610	40S	-0.612862	0.0402499	-1.04624	-1.54605	-0.808259	-0.965076	0.840614	1.59161	1.45311
40S LSU_2	AT1G15930_42029	40S	-0.300586	-0.379999	-0.614225	-0.827982	-1.68377	-0.841032	1.22546	1.44994	1.02942
40S LSU_2	AT3G04920_25705	40S	-1.15324	0.741323	1.0196	-1.96227	-0.984664	-0.708001	0.286234	1.01739	0.639751
40S LSU_2	AT4G33865_29657	40S	-1.26955	-0.024212	-0.881419	-1.42031	-0.687615	-0.794358	1.39236	1.1003	1.36458
40S LSU_2	AT4G39200_26682	40S	0.954793	1.21042	0.0278071	-1.76337	-1.18408	-1.23617	-0.0467784	0.948383	0.285654
40S LSU_2	AT5G02960_43588	40S	0.176208	0.61659	0.385138	-1.99894	-0.830674	-1.00423	1.42084	0.311738	-0.166751
40S LSU_2	AT5G58420_34267	40S	0.425153	-0.882777	0.361221	-0.810909	-2.29938	0.750223	0.653071	0.621023	1.2661
40S LSU_3	AT2G21580_27470	40S	-0.252673	-1.39328	-1.80701	0.674107	0.178992	1.40876	1.3974	-0.284729	0.562164
40S LSU_3	AT2G32060_18855	40S	-1.9946	-1.6908	-0.40438	0.908084	0.70285	0.281103	1.09236	0.529905	0.392082
40S LSU_3	AT2G32060_21344	40S	-0.292526	-1.38005	-0.825872	1.43085	0.0621057	2.11416	1.04677	-0.525712	-0.73907
40S LSU_3	AT2G32060_2865	40S	-0.942568	-1.3468	-0.0257236	1.30993	1.73619	0.708455	0.569764	-0.555466	-0.957641
40S LSU_3	AT5G09510_28095	40S	0.501539	-0.771287	-2.02499	1.26442	0.403454	-0.685206	1.0497	-0.691576	0.9181
40S LSU_4	AT2G17360_4692	40S	-0.228071	-1.04457	-1.86246	-0.658548	-0.860775	1.95728	0.817233	0.926749	1.41085
40S LSU_4	AT2G36160_12220	40S	-1.23946	-0.608135	-2.31613	0.076056	1.00719	-0.389993	0.642943	1.41263	0.921512
40S LSU_4	AT3G02080_16508	40S	-0.649722	-1.2922	-1.1928	0.0618397	-1.04838	0.106059	1.07188	1.39122	1.24604
40S LSU_4	AT5G16130_1844	40S	-0.371299	-1.97034	-0.126919	-0.422253	-0.456617	1.26636	1.20519	0.959665	0.269772
40S LSU_4	AT5G18380_18550	40S	-1.53444	-1.1992	-0.397523	0.564241	-1.23589	0.0862343	0.414501	1.47346	1.47175
40S LSU_4	AT5G28060_3693	40S	-1.43156	-1.0606	-1.4401	-0.271652	0.129687	-0.402201	0.782289	1.45229	1.65917
40S LSU_4	AT5G62300_36576	40S	-1.45852	-1.20129	0.08392	-0.807316	-1.05411	0.488423	1.34035	0.973748	1.14574
60S LSU_1	AT1G01100_3179	60S	-0.497086	-0.364148	-0.0477519	-0.871502	-0.763501	-1.13219	0.211163	1.02481	1.92338
60S LSU_1	AT1G01100_41721	60S	-1.05793	-0.384384	0.602151	-1.41856	-0.894884	-0.660043	0.296861	1.3658	1.58951
60S LSU_1	AT2G27720_8321	60S	0.0642229	-0.900182	-0.882502	-0.241454	-1.17304	0.487527	0.66179	1.53482	0.708519
60S LSU_1	AT2G32220_44656	60S	0.394783	0.753124	-0.0313327	-0.258876	-1.10057	-1.17902	-0.0904369	-1.38795	1.93076
60S LSU_1	AT2G44120_18739	60S	-0.28814	-0.723559	-0.169504	-0.789882	-0.588251	-1.36729	0.981112	1.32824	1.33892
60S LSU_1	AT3G02190_12503	60S	0.861875	0.301157	0.685302	-2.21313	-1.9116	-0.162308	0.972752	-0.191056	0.810739
60S LSU_1	AT3G09200_44892	60S	-1.58656	-0.645551	0.439651	-1.35828	1.253	0.0954267	-0.534833	0.970306	1.19776
60S LSU_1	AT3G49910_5409	60S	-0.331132	-1.22287	-0.452523	-1.23622	0.239712	0.451171	0.630975	1.48033	0.677668
60S LSU_1	AT3G49910_9384	60S	-1.26377	-0.120266	0.193211	-0.665348	-0.808083	-1.15406	1.14183	0.169696	1.75744
60S LSU_1	AT3G53740_13161	60S	-1.15851	-0.583552	-0.0829878	-1.75089	-0.222974	0.0385725	0.952596	1.49127	1.04271
60S LSU_1	AT3G59540_2580	60S	-0.0700407	-0.71749	-0.823606	-0.249216	-1.35411	0.47125	1.57583	0.71937	0.519357
60S LSU_1	AT3G62870_37827	60S	0.729989	-0.737153	-1.00199	0.261291	-0.989819	-0.810392	0.342162	1.67507	0.78203
60S LSU_1	AT5G27770_13217	60S	-0.731728	-0.478579	-0.685431	0.773698	-0.489604	-1.42084	1.05279	0.305431	1.45036
60S LSU_2	AT1G04480_16075	60S	-0.439724	-0.170388	-0.176593	0.982668	-1.71746	1.77677	-0.288725	1.36068	-0.772725
60S LSU_2	AT1G18540_3258	60S	0.20872	-0.144051	0.0070115	1.10622	-0.714937	0.401474	-1.81155	-0.601496	1.47548
60S LSU_2	AT2G27710_25131	60S	1.43657	-0.780645	-0.233478	1.46327	0.808297	-0.324012	-1.51058	0.447932	-0.493624
60S LSU_2	AT2G39390_33512	60S	-1.17474	0.492235	-0.000988238	0.504314	2.64885	-0.279272	-0.136534	-1.78322	-0.344561
60S LSU_2	AT2G47610_30142	60S	1.17739	-0.549209	0.517363	1.5666	-0.84924	1.20167	-0.279896	-0.926443	-1.24821
60S LSU_2	AT3G16080_30887	60S	-0.990019	0.0514329	0.667849	1.96385	0.999168	0.826748	-0.342315	-1.99954	-0.901666
60S LSU_2	AT3G49910_24065	60S	-0.132186	0.156751	-0.158929	-1.56826	0.453705	2.6522	-0.383625	-0.923872	-0.12442
60S LSU_2	AT3G58700_43044	60S	0.370853	-1.34691	-0.639901	0.039782	0.299787	1.6712	0.417052	-0.106135	-0.073849
60S LSU_2	AT5G48760_6069	60S	-0.369239	-0.0230364	-0.0750816	1.50936	-2.02399	1.17288	0.776122	0.492728	-1.05914
60S LSU_3	AT1G70600_16128	60S	0.21632	1.49099	1.07646	-0.93244	1.37875	0.176928	-1.48931	-0.815148	-1.35619
60S LSU_3	AT1G79075_12979	60S	-0.647223	0.907556	1.41043	-0.981318	2.02291	-0.0152755	-1.59367	-0.280624	-0.991684
60S LSU_3	AT2G25210_8656	60S	1.36455	1.12325	0.396828	0.356723	-1.03782	-0.342154	-0.579913	0.921996	-1.98406
60S LSU_3	AT2G34480_1781	60S	1.96327	1.23006	-0.261224	0.850684	-0.0356764	-1.97617	-1.12571	-0.423654	-0.381069
60S LSU_3	AT2G43460_39623	60S	0.803606	1.39609	1.70664	-0.395888	0.421875	-1.84929	-1.14749	-0.157099	-1.21017
60S LSU_3	AT3G06700_14247	60S	1.74684	1.06025	1.38467	-0.741511	-0.571619	0.238351	-1.00042	-0.937183	-1.40941
60S LSU_3	AT3G06700_43967	60S	1.07858	1.37098	0.773415	0.381338	1.20979	-1.07995	-1.42376	-1.27704	-1.19854
60S LSU_3	AT3G13580_976	60S	1.27681	1.69073	0.146105	-1.2326	-1.9116	0.0451793	-0.899107	0.759978	-0.383636
60S LSU_3	AT3G16780_23066	60S	0.865516	0.950986	1.05103	-1.26453	0.467261	1.2943	-0.491295	-1.673	-1.42007
60S LSU_3	AT3G28500_1995	60S	1.37391	0.12892	2.31255	-0.762039	-0.698876	0.0245824	-0.9965	-1.16622	-0.558456
60S LSU_3	AT3G44590_31586	60S	0.780468	1.1969	1.75172	-0.928144	0.328116	-0.989397	-1.05649	0.354515	-1.67481
60S LSU_3	AT4G25890_16389	60S	-0.269644	1.32713	1.7847	-0.520961	1.44957	-1.33434	-1.42774	-0.659714	-0.841152
60S LSU_3	AT5G02610_13391	60S	0.59206	2.07101	0.099964	-0.0370742	-1.20922	-1.15097	-0.0115694	-1.84555	0.439441
60S LSU_3	AT5G02870_13112	60S	-0.102881	0.793692	1.82187	1.86353	-0.946106	-0.289619	-0.992719	-1.60335	-0.769444
60S LSU_3	AT5G02870_13894	60S	1.1307	1.19578	1.82033	0.064872	0.0276804	-1.26949	-0.667208	-1.73456	-1.08073
60S LSU_3	AT5G22440_30308	60S	1.46532	-0.370164	1.46369	0.477857	0.678031	-0.0547935	-0.754498	-0.79598	-1.67132
60S LSU_3	AT5G23900_6923	60S	1.07084	1.78661	1.11927	-0.915176	-1.09319	-1.55227	-1.38159	0.328493	-0.137269
60S LSU_3	AT5G40040_24618	60S	1.51773	0.292254	0.625845	0.726525	1.09055	0.195642	-1.01199	-1.54536	-1.53893
60S LSU_3	AT5G45775_13443	60S	1.61483	0.985591	0.971104	0.846892	0.478748	-1.05492	-1.28652	-1.31359	-1.27554
60S LSU_3	AT5G67510_19783	60S	0.234749	2.02094	1.11044	-0.470606	0.878649	-1.0756	-1.13049	-0.929875	-1.19782
60S LSU_4	AT1G07070_19064	60S	-0.0236194	-1.13316	-0.857061	1.17211	1.19093	0.772909	0.477253	0.0273012	-0.750103
60S LSU_4	AT1G57660_14698	60S	-1.46142	-0.72419	-0.33523	-1.075	1.06183	0.494377	1.33385	1.20845	-0.266246
60S LSU_4	AT1G57860_27814	60S	-0.598785	-0.680255	-1.45799	-0.0921476	0.550892	0.19107	1.45576	0.514812	0.377243
60S LSU_4	AT1G57860_32009	60S	-1.33526	-0.539253	-0.887634	-0.712625	0.965795	0.771189	0.270115	0.0577218	1.3373
60S LSU_4	AT2G19740_22435	60S	-0.688638	-0.575097	-1.32614	1.08927	-0.141197	0.638376	1.37602	-0.449518	0.351136
60S LSU_4	AT2G36170_37846	60S	-1.02187	-1.05482	-0.755331	0.379998	-0.176319	0.911036	1.31619	0.110188	0.55457
60S LSU_4	AT3G08520_42103	60S	-2.28223	-0.619758	-0.137566	-0.154098	0.861861	-0.153889	1.21065	1.12593	0.235931
60S LSU_4	AT3G09630_11832	60S	0.134184	-0.901358	-1.099	0.533339	-0.137722	-0.702478	1.43188	-0.00501168	0.862711
60S LSU_4	AT3G49910_32004	60S	0.327647	-1.22338	-1.22493	0.358443	0.444972	-0.127263	0.631671	1.19943	0.233583
60S LSU_4	AT4G14320_28943	60S	-0.874073	-1.07139	-0.903421	1.63788	0.819366	0.386675	0.20305	-0.212801	0.549772
60S LSU_4	AT4G18100_18430	60S	0.123159	-1.34954	-0.907242	0.151072	0.277802	0.519874	1.06524	0.944626	-0.170698
60S LSU_4	AT4G18100_36446	60S	-1.23802	-1.05963	-0.934231	1.00564	0.600417	0.653162	0.804437	0.21484	0.422824
60S LSU_4	AT5G60670_9353	60S	-1.27347	-0.324301	-1.39769	0.287075	0.121892	0.925534	-0.148676	1.03684	1.00494
