# Supplementary material for: Spatially Enriched Paralog Rearrangements Argue Functionally Diverse Ribosomes Arise during Cold Acclimation in Arabidopsis
Source: Int J Mol Sci. 2021 Jun 7;22(11):6160. doi: 10.3390/ijms22116160 (PMC8201131; doi:10.3390/ijms22116160)
Supplement: Supplementary file 1 [file ijms-22-06160-s001.zip › Table S3.xlsx]

## Sheet: Legend
Table S3.Legend. Normalized LFQ abundances of 40S and 60S RPs measured across 40S, 60S, 80S, to polysome fractions of Arabidopsis thaliana Col-0 wild type and two reil1 reil2 mutants’ roots. LFQ abundances of 40S SSU RPs were normalized to the sum of abundances of all 40S SSU proteins in each fraction. LFQ abundances of 60S LSU RPs were normalized to the sum of abundances of all 60S LSU proteins …

## Sheet: A1 (Dataset_1)
	reil1.1reil2.2_L_20°C_60S80S	reil1.1reil2.2_L_20°C_50S	reil1.1reil2.2_L_20°C_60S	reil1.1reil2.2_L_20°C_30S40S	reil1.1reil2.2_L_20°C_P	Col-0_L_10°C_30S40S	Col-0_L_10°C_50S	Col-0_L_10°C_60S	Col-0_L_10°C_60S80S	Col-0_L_10°C_80S	Col-0_L_10°C_P	reil1.1reil2.2_L_10°C_30S40S	reil1.1reil2.2_L_10°C_50S	reil1.1reil2.2_L_10°C_60S	reil1.1reil2.2_L_10°C_60S80S	reil1.1reil2.2_L_10°C_80S	reil1.1reil2.2_L_10°C_P	Col-0_R_20°C_40S	Col-0_R_20°C_60S	Col-0_R_20°C_60S80S	Col-0_R_20°C_80S	Col-0_R_20°C_P	reil1.1reil2.2_R_20°C_40S	reil1.1reil2.2_R_20°C_50S	reil1.1reil2.2_R_20°C_60S	reil1.1reil2.2_R_20°C_60S80S	reil1.1reil2.2_R_20°C_80S	reil1.1reil2.2_R_20°C_P	Col-0_R_10°C_40S	Col-0_R_10°C_50S	Col-0_R_10°C_60S	Col-0_R_10°C_60S80S	Col-0_R_10°C_80S	Col-0_R_10°C_P	reil1.1reil2.2_R_10°C_40S	reil1.1reil2.2_R_10°C_50S	reil1.1reil2.2_R_10°C_60S	reil1.1reil2.2_R_10°C_60S80S	reil1.1reil2.2_R_10°C_80S	reil1.1reil2.2_R_10°C_P
AT1G01050	20593000	0	0	0	13834000	0	23161000	0	0	0	0	30031000	14773000	11966000	0	12329000	0	12151000	16691000	0	0	0	0	24691000	26988000	0	22313000	0	22135000	0	0	0	16545000	0	0	18296000	35925000	40752000	27281000	24539000
AT1G01080	0	0	0	0	0	22631000	0	0	0	0	0	14002000	0	0	0	0	0	30103000	0	0	0	0	0	0	0	0	0	0	0	0	0	0	0	0	0	0	0	0	0	0
AT1G01090	12389000	81506000	1225000000	218980000	1444700000	41052000	726740000	239550000	53225000	0	0	21316000	628840000	209940000	45699000	61214000	0	46179000	1391000000	39384000	72396000	10404000	4418000	1407800000	1434400000	330670000	235360000	0	99046000	359510000	25461000	24754000	96896000	37153000	8137500	42796000	23397000	24811000	17035000	24476000
AT1G01100.4;AT1G01100.2;AT1G01100.1;AT1G01100.3	1036800000	113120000	1157100000	4265700	546850000	16012000	41363000	1803000000	822670000	493560000	273680000	15737000	282760000	963860000	454030000	0	509450000	79792000	1168700000	1658800000	0	1190800000	24807000	863920000	3063400000	2122900000	0	515840000	32757000	317270000	2273100000	1873300000	1386500000	933600000	24045000	91422000	1417900000	751550000	579580000	591230000
AT1G01580	11274000	0	0	0	0	0	0	0	0	0	0	0	0	0	0	0	0	0	22845000	0	8434900	0	8971900	15200000	7338200	17365000	11948000	0	14113000	0	0	0	41626000	50291000	40147000	14211000	0	0	0	7458700
AT1G01910.4;AT1G01910.2;AT1G01910.1;AT1G01910.3;AT1G01910.5	0	0	0	6726200	0	0	0	0	0	0	0	0	0	0	0	0	0	0	0	0	0	0	7255000	0	0	0	0	0	0	0	0	0	0	0	17010000	0	0	0	10078000	15655000
AT1G02140	7305900	0	0	0	0	0	0	0	0	0	0	0	0	0	0	0	0	0	0	0	0	0	0	0	0	0	0	0	0	0	0	0	0	0	0	16018000	0	0	0	9961400
AT1G02500	60003000	0	0	0	0	0	14838000	0	0	0	0	10007000	6540400	8231600	0	0	0	0	9570700	0	0	0	0	9656800	11984000	0	0	0	0	0	0	0	0	0	0	123200000	10215000	23659000	15339000	35121000
AT1G02560	840960	0	11780000	0	8572100	9407600	0	0	0	0	0	0	0	0	0	0	0	0	0	0	0	0	0	0	0	0	0	0	0	0	0	0	0	0	0	6471800	0	0	0	0
AT1G02780.1	637020000	42859000	415450000	56259000	491920000	22617000	36748000	453630000	875160000	435090000	370350000	0	81345000	511930000	443640000	0	391700000	31454000	896180000	1332000000	0	410050000	19159000	186740000	1625800000	1977100000	0	149020000	0	0	1248600000	242680000	301400000	256050000	15727000	92329000	813400000	179400000	360230000	304210000
AT1G02870	2535300	0	0	0	0	0	0	0	10705000	0	0	0	0	0	15132000	13561000	0	10398000	0	0	0	0	0	0	11639000	23562000	0	0	0	0	0	0	8979400	0	0	0	0	13202000	10703000	0
AT1G02920	24414000	0	0	0	12936000	4909700	115230000	40499000	0	0	0	80510000	45204000	27973000	0	24749000	0	34080000	10653000	0	0	0	0	17880000	9593800	7221800	0	0	0	0	0	0	0	9979600	0	39579000	17383000	21082000	14761000	24403000
AT1G02930	4159700	0	0	0	21742000	12729000	177570000	39645000	10665000	0	0	115710000	58264000	29746000	0	11721000	0	60837000	0	0	0	0	0	7290400	0	0	0	0	0	0	0	0	0	0	0	25144000	12980000	7158600	8917500	0
AT1G03220	387230000	0	0	0	13569000	6027900	20239000	0	0	0	0	0	10260000	8038400	0	0	0	15781000	84603000	0	33339000	0	64708000	218050000	37661000	32684000	9346900	0	65387000	0	0	0	22267000	53504000	63674000	483020000	49776000	57627000	70114000	140150000
AT1G03230	28738000	0	0	0	4279400	4716600	5274600	0	0	0	0	0	0	0	0	0	0	0	20425000	0	8567400	0	16966000	14578000	5051900	9247900	9508600	0	21218000	0	0	0	11087000	20401000	0	38288000	0	5201500	11709000	19014000
AT1G03250	0	0	0	12714000	0	0	0	0	0	0	0	0	0	13436000	52546000	0	0	0	0	0	0	0	0	0	15429000	124940000	29359000	0	0	0	0	0	0	0	0	0	0	30247000	10525000	0
AT1G03475	0	0	14978000	12059000	22830000	12771000	0	14773000	14715000	0	21566000	16396000	17004000	11462000	0	10024000	0	13016000	7882400	0	0	0	0	0	0	0	0	0	0	0	0	0	0	0	0	0	0	6025800	0	0
AT1G03680	0	0	0	0	17721000	6786700	9469800	18431000	0	0	0	7281300	11248000	0	0	0	0	4206900	0	0	0	0	0	0	0	0	0	0	0	0	0	0	0	0	0	0	0	0	0	0
AT1G03860	70509000	0	0	0	79510000	11745000	147430000	73193000	0	0	0	0	117770000	55571000	0	6270700	0	4915100	31724000	0	0	0	0	233850000	11146000	0	11731000	0	0	22165000	0	0	13100000	17962000	0	54102000	11657000	10551000	36412000	60406000
AT1G04170.1	0	12517000	0	10369000	8970400	12263000	0	0	0	0	32245000	12771000	16702000	0	18394000	0	37296000	18716000	0	0	0	24097000	18187000	15262000	0	11063000	0	34342000	0	0	0	0	28937000	18106000	17289000	12719000	17479000	11260000	21826000	23130000
AT1G04270.2;AT1G04270.1;AT5G43640.1;AT1G33850.1;AT5G09490.1	0	0	0	0	35937000	26538000	0	19232000	0	57765000	36539000	22586000	14062000	0	0	0	23256000	20287000	0	0	0	94282000	20063000	51342000	0	47955000	0	0	0	0	0	21970000	100380000	92340000	11524000	0	0	0	0	46908000
AT1G04410.1;AT5G56720.1	72330000	134430000	81399000	145300000	86374000	127290000	179460000	155770000	112160000	79680000	81312000	114100000	151000000	123740000	229060000	0	183400000	193080000	59048000	100980000	0	174950000	179400000	86124000	94887000	141030000	0	234790000	95642000	112520000	81633000	152000000	137930000	147800000	107510000	265070000	124800000	214680000	288510000	189680000
AT1G04420	0	0	10935000	0	15762000	8278700	10795000	0	0	0	0	0	0	0	0	0	0	0	0	0	0	0	0	0	0	0	0	0	0	0	0	0	0	0	0	0	0	0	0	0
AT1G04510	5093700	0	0	0	0	4935400	7510300	0	0	0	0	19178000	0	0	0	0	0	16201000	0	0	0	0	0	0	0	0	0	0	0	0	0	0	6245500	8276700	0	0	0	0	0	0
AT1G04690	78211000	0	14569000	0	22610000	15244000	0	0	0	0	0	14195000	0	0	0	0	0	25390000	16077000	0	4437400	0	0	24419000	0	0	19096000	0	0	0	0	0	12424000	0	0	10627000	7003800	0	10360000	13828000
AT1G04750	23641000	0	0	0	0	0	0	0	0	0	0	0	0	0	0	0	0	0	20203000	0	0	0	0	10247000	0	0	0	0	0	0	0	0	0	0	0	5963000	0	0	0	4586800
AT1G05010	3430400	0	0	0	8566900	0	26158000	26612000	13316000	0	0	17077000	16195000	14476000	0	0	0	19033000	0	0	0	0	0	0	0	0	0	0	0	0	0	0	0	0	0	9311100	0	0	0	0
AT1G05190.1	642620000	5870100000	1631400000	39115000	442590000	62780000	2967400000	1102000000	204480000	135580000	545750000	129350000	3904200000	332330000	490410000	0	253630000	20613000	0	2698700	0	16734000	3590900	310270000	28935000	14871000	0	0	0	47328000	0	25299000	0	0	0	165590000	140030000	9330400	3437100	2069200
AT1G05250	36729000	0	0	0	0	0	0	0	0	0	0	0	0	0	0	0	0	0	8800900	0	0	0	0	11617000	4157100	0	0	0	6288000	0	0	0	0	13441000	9100900	71410000	8287000	5933200	12299000	21924000
AT1G05260	19747000	0	0	0	0	0	0	0	0	0	0	0	0	0	0	0	0	0	18473000	0	0	0	14494000	22680000	11508000	12552000	10995000	0	19429000	0	0	0	10333000	14255000	0	31819000	9042600	8634200	20865000	16135000
AT1G05520	3121700	0	0	0	3379100	0	0	0	0	0	0	0	0	0	0	0	0	4211000	4157200	0	0	0	0	0	3520700	0	0	0	0	0	0	0	0	4241900	0	9447100	0	4577300	0	0
AT1G06000	24793000	0	0	0	0	0	0	0	0	0	0	0	0	0	0	0	0	0	0	0	0	0	0	0	0	0	0	0	0	0	0	0	0	0	0	15332000	0	5601500	0	0
AT1G06220.2;AT1G06220.1;AT5G25230.1	0	0	0	11160000	17603000	20347000	0	0	0	0	37170000	20530000	6088700	0	0	0	43214000	4345800	0	0	0	9747500	5466200	0	0	0	0	23404000	0	0	0	0	17090000	0	10496000	0	3220100	0	3589300	5139700
AT1G06680	0	55643000	137530000	54961000	207620000	90885000	125760000	105770000	68574000	51652000	28421000	85299000	85276000	93582000	58715000	98672000	0	88582000	5612600	0	0	0	0	12870000	6708700	0	8511700	0	0	0	0	0	0	0	0	0	0	0	0	0
AT1G06950	13105000	0	4292600	0	24433000	9186300	30297000	0	0	0	0	13665000	52004000	20403000	0	0	0	17302000	4276400	0	0	0	0	6532900	6458900	4562200	0	0	0	0	0	0	0	0	0	29762000	15847000	6566300	14458000	15958000
AT1G07070.1	0	0	0	0	0	0	0	22411000	0	0	0	0	0	18534000	19782000	0	12348000	0	13698000	16859000	0	0	0	0	44403000	22167000	0	0	0	0	46971000	0	46134000	0	0	0	0	0	0	0
AT1G07140	2603500	0	7911800	0	8074000	4912300	6187400	0	3128200	0	0	0	8688500	0	6078100	0	0	7058800	0	0	0	0	0	13068000	0	0	4335500	0	0	0	0	0	0	6585300	7413300	6847500	0	5476100	0	0
AT1G07210.1	0	0	0	0	0	10888000	0	0	0	0	0	16456000	0	0	0	0	14906000	18619000	0	0	0	0	21768000	0	0	9913500	0	0	0	0	0	0	0	0	21717000	0	0	0	10304000	11902000
AT1G07240	1228000	0	0	0	0	0	0	0	0	0	0	0	0	0	0	0	0	0	4612600	0	0	0	0	0	0	0	0	0	0	0	0	0	0	0	0	11335000	0	0	0	0
AT1G07370	13238000	0	0	0	5462300	3089800	0	0	0	0	0	0	4308600	0	0	0	0	0	6309600	0	0	0	0	7228500	0	0	0	0	0	0	0	0	0	4198300	0	4579000	0	0	0	0
AT1G07750	20119000	0	10160000	0	10241000	9498900	12287000	0	0	0	0	10702000	0	0	0	0	0	11127000	9666100	0	9662800	0	16375000	17021000	9900100	11720000	12446000	0	0	0	0	0	16788000	13129000	0	14075000	11809000	13704000	15093000	16098000
AT1G07830.1	0	19641000	35070000	0	0	0	25544000	0	0	0	0	0	26689000	0	0	0	0	0	0	0	0	0	0	34359000	0	0	0	0	0	0	0	14253000	15673000	0	0	40709000	33035000	14862000	17598000	20043000
AT1G07890	391710000	21838000	58148000	21348000	86937000	68769000	158960000	106920000	60999000	12585000	0	154040000	131650000	102350000	39764000	58933000	0	106180000	227440000	10811000	43242000	0	56914000	213580000	201740000	82442000	133660000	0	185160000	140140000	0	0	83554000	83449000	85313000	387700000	159870000	209100000	183410000	273510000
AT1G08360.1	344690000	0	477570000	0	322210000	0	0	253620000	141500000	132680000	144290000	0	62784000	263890000	123930000	0	225160000	45079000	671410000	712650000	0	233310000	7950700	401710000	338870000	587080000	0	0	0	0	200640000	326870000	474360000	155630000	15621000	66555000	1152300000	157750000	191420000	209990000
AT1G08410.1;AT2G27200.1	0	0	0	0	0	0	0	0	0	0	0	6485500	11442000	41409000	0	0	0	0	0	0	0	0	0	0	24053000	0	0	0	0	0	0	0	0	0	10274000	0	0	0	0	0
AT1G08480	15844000	0	0	0	0	0	0	0	0	0	0	0	0	0	0	0	0	0	0	0	0	0	0	7771900	0	0	0	0	0	0	0	0	0	0	0	12785000	0	0	0	10660000
AT1G08830	10149000	0	0	0	14856000	9934800	0	15161000	0	0	0	16070000	0	0	0	0	0	15294000	32168000	0	0	0	0	13980000	22327000	0	0	0	0	0	0	0	0	0	0	19077000	31061000	31406000	0	25774000
AT1G09130	0	0	0	0	2273900	0	4061100	0	0	0	0	0	3040500	0	0	0	0	0	0	0	0	0	0	0	0	0	0	0	0	0	0	0	0	0	0	0	0	0	0	0
AT1G09210	62431000	0	10964000	0	14906000	12038000	22571000	0	0	0	0	11690000	0	18008000	0	0	0	12750000	23257000	0	0	0	11922000	20381000	13057000	12109000	13580000	0	11152000	0	0	0	14429000	21329000	0	27322000	20278000	17323000	32150000	34966000
AT1G09340	0	95176000	165390000	96289000	232150000	162220000	126910000	170450000	111370000	80369000	178470000	142340000	70141000	95832000	82365000	108770000	0	93751000	0	0	0	0	0	0	0	0	0	0	0	0	0	0	0	0	0	0	0	0	0	0
AT1G09620	20338000	0	0	0	5288700	6114500	9224200	0	0	0	0	9938700	7977700	8955300	0	0	0	7685200	5359200	0	0	0	0	8162000	6986600	0	4931600	0	0	0	0	0	6044700	0	0	9890200	0	3864000	0	10110000
AT1G09640.1;AT1G09640.2	11974000	24039000	15073000	35017000	24552000	57796000	48191000	28222000	0	48827000	68423000	45094000	57839000	26548000	29111000	0	37350000	38717000	0	8427300	0	32345000	29515000	48986000	22430000	34347000	0	61795000	0	0	0	24446000	42127000	0	104390000	60727000	60615000	47927000	28603000	43628000
AT1G09740.1	0	0	0	0	0	0	0	0	0	0	0	0	0	0	0	0	0	8646500	0	0	0	0	0	0	0	0	0	0	0	0	0	0	0	0	19697000	0	0	0	9608800	0
AT1G09750	0	0	0	0	31209000	10216000	30957000	0	0	0	0	20671000	0	0	0	0	0	12108000	0	0	0	0	0	0	0	0	0	0	0	0	0	0	0	0	0	0	0	0	0	0
AT1G09770	0	0	0	0	0	0	5733800	0	0	0	0	10494000	0	0	0	0	0	7055600	0	0	0	0	0	0	0	0	0	0	0	0	0	0	0	5048000	0	0	0	0	0	0
AT1G09780	179520000	0	31747000	0	35791000	18926000	58453000	63982000	38097000	0	0	77692000	44378000	56136000	39024000	54714000	0	43399000	49796000	0	23672000	0	71490000	62262000	45314000	29705000	29666000	0	75950000	0	0	0	66122000	30443000	60957000	122040000	104440000	140850000	89009000	64152000
AT1G10290	204430000	0	13234000	0	31300000	50456000	26796000	15362000	0	0	0	63719000	26762000	22786000	0	0	0	88972000	9246300	0	0	0	16203000	86476000	28322000	0	9402900	0	27258000	32732000	0	0	18840000	25729000	28257000	16623000	23036000	44766000	53747000	103770000
AT1G10760	0	0	0	0	4672700	0	5114200	0	0	0	0	0	9903900	5622400	0	0	0	4628300	0	0	0	0	0	0	0	0	0	0	0	0	0	0	0	0	0	0	0	0	0	0
AT1G10840.1;AT1G10840.2	0	0	0	42090000	0	23505000	0	0	0	0	6793000	64769000	9651900	0	0	0	12451000	9398500	0	0	0	0	20705000	9461700	5510600	0	0	0	0	0	0	0	0	0	36425000	14089000	19470000	9900900	13134000	13685000
AT1G11580	0	0	0	0	0	0	0	0	0	0	0	0	0	0	0	0	0	0	0	0	0	0	32916000	0	0	0	0	0	0	0	0	0	9289800	6771600	0	0	0	0	11346000	0
AT1G11750	2751300	0	4923100	0	9970600	5030000	8621100	10198000	7499700	0	0	7371400	9483700	7773000	0	0	0	5472800	0	0	0	0	0	3608500	0	0	0	0	0	0	0	0	0	0	0	6399900	0	0	0	0
AT1G11840	119190000	32660000	56362000	21899000	86433000	49521000	62519000	48750000	23547000	0	0	27095000	59757000	45343000	42666000	55447000	0	37212000	97117000	0	36213000	0	69693000	125330000	94220000	72477000	81239000	0	89143000	79649000	0	0	40453000	46689000	126090000	99201000	109600000	128610000	106690000	99178000
AT1G11860	2918800	7183500	20771000	12903000	56776000	58879000	38611000	29230000	22436000	0	0	26087000	30277000	25516000	0	14421000	0	24493000	0	0	0	0	0	10175000	0	0	0	0	0	0	0	0	7433700	8085000	0	14471000	0	0	0	0
AT1G11910	191160000	0	11831000	0	31997000	12134000	58528000	29367000	19185000	0	0	27228000	34691000	24250000	0	18819000	0	46528000	81793000	0	15827000	0	30643000	95047000	46107000	24937000	36110000	0	56853000	60419000	0	0	59104000	54367000	51919000	161640000	50566000	31995000	67287000	82101000
AT1G12000	32053000	0	0	0	0	0	12009000	0	0	0	0	0	3856800	0	0	0	0	0	8563200	0	0	0	0	16026000	10183000	0	0	0	3345400	0	0	0	5342900	0	0	120040000	0	13225000	19905000	11017000
AT1G12140	2360600	0	0	0	0	0	0	0	0	0	0	0	0	0	0	0	0	0	0	0	0	0	0	0	0	0	0	0	0	0	0	0	0	0	0	11854000	0	0	4315700	0
AT1G12240	19707000	0	8277900	0	9620700	5991600	0	0	0	0	0	0	3766800	0	0	0	0	0	10507000	0	0	0	7194100	6759000	5073300	0	0	0	0	0	0	0	0	6753700	0	19112000	7177400	11123000	0	0
AT1G12310	7128600	0	8698300	0	42776000	0	22219000	0	0	0	0	0	38451000	12786000	0	0	0	0	22994000	0	0	0	0	24979000	9460000	8557900	0	0	0	0	0	0	7453600	11869000	0	30546000	22031000	32359000	20840000	12875000
AT1G12840	54386000	0	54061000	0	731600000	17593000	238380000	56675000	0	0	0	25536000	316900000	122490000	36077000	14140000	0	74517000	124370000	0	31426000	0	16151000	190670000	43237000	17247000	25270000	0	0	69475000	0	0	46503000	24188000	0	100070000	53778000	56798000	25404000	43402000
AT1G12900	0	11159000	22128000	9568900	38473000	29410000	49722000	38706000	12966000	0	24850000	39159000	40452000	0	14698000	16502000	0	22209000	0	0	0	0	0	0	0	0	0	0	0	0	0	0	0	0	0	0	0	0	0	0
AT1G13060	36157000	0	0	0	19474000	5524900	7770600	0	0	0	0	17603000	13035000	0	0	0	0	11964000	55419000	0	8653600	0	0	21599000	0	0	0	0	0	30523000	0	0	0	0	0	14628000	0	32843000	0	15333000
AT1G13440	193410000	0	0	0	68476000	0	62571000	0	0	0	0	0	82909000	34098000	0	39644000	0	76240000	56907000	0	0	0	0	91252000	5432300	41516000	51941000	0	62155000	0	0	0	0	51816000	49570000	84301000	159250000	37110000	0	125360000
AT1G13930.3;AT1G13930.2;AT1G13930.1	0	0	0	30685000	14418000	15663000	14776000	0	0	0	22221000	0	0	0	0	0	9248900	52617000	0	11730000	0	25358000	47715000	0	21231000	33558000	0	47599000	0	0	0	0	26689000	0	8432500	0	24466000	0	13055000	15196000
AT1G14320.1;AT1G14320.2	256200000	0	129870000	0	0	0	0	0	0	159840000	124530000	0	42553000	0	0	0	0	0	113330000	177270000	0	144580000	0	157720000	355170000	65923000	0	0	0	0	0	244060000	0	0	0	0	161750000	51617000	0	0
AT1G14610	4616200	0	0	0	0	2684900	0	0	0	0	0	0	0	0	0	0	0	0	0	0	0	0	0	4145900	0	0	0	0	0	0	0	0	0	0	0	6311600	0	0	0	5073100
AT1G14620	105000000	18345000	52444000	54170000	0	28412000	0	51792000	32766000	0	0	26991000	0	68364000	25632000	17235000	0	32218000	10859000	39961000	28606000	0	25218000	0	153180000	42160000	39489000	0	45337000	0	0	0	39122000	40358000	0	6704300	50373000	168830000	43585000	67556000
AT1G14810	4492300	0	0	0	0	0	0	0	0	0	0	7909200	0	0	0	0	0	0	0	0	0	0	0	6229800	5089000	0	0	0	0	0	0	0	0	0	0	6378500	0	4879900	0	7531700
AT1G14830	285840000	0	0	0	6852200	44375000	27664000	0	0	0	0	59755000	12359000	25264000	0	0	0	68116000	0	0	0	0	0	48615000	7694200	0	8896300	0	0	0	0	0	16805000	22915000	0	24267000	24068000	7911400	20046000	72938000
AT1G14980	15330000	0	0	0	12945000	0	7630000	0	0	0	0	0	0	0	0	0	0	0	15874000	0	0	0	0	25041000	0	0	9173500	0	0	0	0	0	0	0	0	6505500	0	14629000	0	0
AT1G15210	893570	0	0	0	0	0	0	0	0	0	0	0	0	0	0	0	0	0	0	0	0	0	0	7047000	0	0	0	0	0	0	0	0	0	0	0	13987000	3327600	3755700	2909100	0
AT1G15690	8520300	0	20623000	0	19605000	15040000	22709000	19369000	13161000	0	0	14207000	29823000	23749000	0	0	0	19078000	16014000	0	0	0	0	16585000	12470000	0	0	0	0	0	0	0	22047000	29382000	0	16646000	0	13193000	0	13608000
AT1G15810.1	0	0	0	0	9862000	0	0	0	0	0	11630000	0	0	0	0	0	6296200	24662000	0	0	0	0	15093000	0	0	7698500	0	0	0	0	0	0	0	0	0	6617100	0	0	0	0
AT1G15820	2258300	0	0	0	151820000	40261000	64458000	58196000	0	0	0	91867000	246840000	107360000	0	0	0	105790000	0	0	0	0	0	21092000	0	0	0	0	0	0	0	0	0	0	0	0	0	0	0	0
AT1G15930.2;AT1G15930.1	82114000	227750000	112010000	417040000	516890000	504750000	189920000	90377000	78231000	268780000	429300000	227030000	121900000	0	72529000	0	510740000	1763200000	74468000	258780000	0	902580000	1333200000	791820000	301070000	430300000	0	296400000	1386600000	275460000	134140000	288890000	457250000	633700000	239800000	125710000	86187000	42434000	214760000	479270000
AT1G16740.1	0	0	22062000	0	9756400	0	35510000	0	0	0	11580000	0	28031000	0	0	0	9789300	0	0	8160600	0	0	0	48979000	0	0	0	0	0	0	0	0	10239000	0	0	32178000	73549000	0	15743000	19143000
AT1G16820	44012000	16836000	0	0	302210000	0	14866000	0	0	0	0	0	101740000	0	0	0	0	0	0	0	0	0	0	0	0	0	0	0	0	0	0	0	0	0	0	0	0	0	0	34569000
AT1G16870.1	0	7759300	0	0	26843000	20973000	8645100	0	0	0	42240000	14191000	8844900	0	0	0	29651000	136160000	0	0	0	24587000	145680000	17445000	6423900	29386000	0	25566000	0	0	0	13574000	33237000	13446000	131100000	5761500	3484500	0	20879000	148850000
AT1G16880	0	0	0	0	17467000	0	0	0	0	0	0	9859000	8422800	0	0	0	0	4510400	0	0	0	0	0	2189200	0	0	0	0	0	0	0	0	0	0	0	0	0	0	0	0
AT1G16890	17113000	0	0	0	8075500	0	9168900	0	0	0	0	0	8473700	0	0	0	0	0	12501000	0	0	0	0	16446000	10697000	0	6727800	0	0	0	0	0	0	0	0	11419000	10184000	11599000	0	10773000
AT1G17170	13021000	0	0	0	0	0	3274600	0	0	0	0	0	4461300	0	0	0	0	0	4102700	0	0	0	0	0	0	0	0	0	0	0	0	0	0	0	0	26835000	0	7728100	0	0
AT1G17180	18148000	0	0	0	0	0	0	0	0	0	0	0	0	0	0	0	0	0	0	0	0	0	0	0	0	0	0	0	0	0	0	0	0	0	0	11710000	0	11278000	0	10937000
AT1G17290	137770000	19243000	43577000	7662100	65374000	39194000	89963000	77587000	55191000	0	50997000	81843000	91362000	87380000	28449000	82674000	0	108350000	64514000	0	14647000	0	50831000	53413000	39865000	28760000	33449000	0	14400000	0	0	0	42480000	36645000	19686000	73730000	82299000	99472000	67123000	109520000
AT1G17745	0	0	0	0	0	0	0	0	0	0	0	5611500	0	0	0	0	0	13165000	0	0	0	0	0	0	0	0	0	0	0	0	0	0	0	0	0	0	0	0	0	3222400
AT1G17860	5275700	0	0	0	0	0	0	0	0	0	0	0	0	0	0	0	0	0	6993100	0	0	0	0	5612700	0	0	0	0	0	0	0	0	0	0	0	0	0	0	0	0
AT1G17880	0	0	0	0	0	0	0	0	0	0	0	0	0	0	0	0	0	5249400	0	0	0	0	0	5546500	0	0	0	0	0	0	0	0	0	0	0	5595200	0	0	0	0
AT1G18080.1	669650000	1907400000	848010000	2400300000	1616500000	2630500000	1249600000	1288100000	852150000	992710000	2090800000	2911400000	1678000000	1252600000	1775700000	0	2688000000	6350600000	433130000	1065500000	25723000	1667500000	8075900000	3769900000	1390000000	2148100000	0	1597700000	1513500000	821190000	717710000	1796000000	2804300000	1461500000	2014000000	1793900000	1900100000	1231200000	1726300000	1486600000
AT1G18210	10569000	0	0	0	0	0	0	0	0	0	0	0	8153100	0	0	0	0	0	9797600	0	0	0	0	8736400	9662800	0	0	0	0	0	0	0	0	0	0	0	0	11490000	12262000	0
AT1G18270	124660000	0	0	0	6406200	0	8566900	0	8391000	0	0	12713000	12709000	0	0	0	0	0	4917400	0	0	0	0	8396300	8113400	0	0	0	0	0	0	0	6241500	12100000	0	259330000	12767000	18042000	29550000	67047000
AT1G18450.1	0	0	0	4802700	0	0	0	0	0	0	0	0	0	0	0	0	0	7673900	0	0	0	0	0	0	0	0	0	0	0	0	0	0	2460900	0	5609800	0	0	0	0	0
AT1G18540.1	1165800000	36705000	1148200000	9614700	414050000	18797000	80704000	1256100000	1086400000	552130000	331960000	17603000	254590000	1123900000	445870000	0	511320000	48369000	1531500000	1457800000	0	638180000	13750000	748610000	2049300000	1708900000	0	187790000	0	75089000	2658700000	1328600000	1193300000	649610000	11819000	68212000	1692400000	490580000	326650000	636450000
AT1G18630	60727000	0	0	0	0	13165000	0	0	0	0	0	25267000	0	0	0	0	0	16125000	18612000	0	0	0	0	23616000	0	0	8994900	0	0	36747000	0	0	0	10078000	0	0	0	0	0	9991500
AT1G19520	127780000	0	0	0	0	23498000	25540000	0	0	0	0	43210000	22584000	9505800	0	0	0	21402000	92579000	0	0	0	30025000	90146000	33043000	4530400	10356000	0	37734000	0	0	0	0	11914000	28698000	48703000	0	8098600	0	25696000
AT1G19570	86152000	116420000	272720000	116900000	549650000	144710000	186310000	155480000	20893000	28615000	0	102840000	127540000	19194000	45495000	93616000	0	74515000	113950000	15169000	41084000	0	41766000	375990000	91384000	71566000	95760000	0	0	0	0	0	74887000	31418000	0	133580000	150740000	130030000	127820000	113660000
AT1G20020	0	34179000	59758000	26401000	96561000	37108000	36999000	31007000	20314000	0	0	28803000	47398000	39599000	0	47402000	0	20389000	0	0	0	0	0	0	0	0	0	0	0	0	0	0	0	0	0	0	0	0	0	0
AT1G20200	16600000	0	0	0	19816000	0	8671400	12733000	0	0	0	7261800	33394000	0	0	0	0	5970500	9563700	0	0	0	0	18189000	0	0	5952000	0	0	0	0	0	0	0	0	62423000	0	11019000	10850000	14557000
AT1G20220	0	0	0	0	0	0	0	0	0	0	0	0	3637900	0	0	0	0	0	0	0	0	0	0	5693500	0	0	0	0	0	0	0	0	0	0	0	11551000	0	0	0	0
AT1G20340	0	0	84146000	0	126400000	45003000	63213000	0	0	0	0	0	52274000	0	0	0	0	0	0	0	0	0	0	0	0	0	0	0	0	0	0	0	0	0	0	0	0	0	0	0
AT1G20440	104570000	0	21713000	0	27553000	13453000	49784000	38131000	0	0	0	56622000	23474000	16478000	0	33398000	0	23832000	103310000	21979000	35084000	0	0	84575000	74290000	30025000	37156000	0	55249000	59525000	0	0	62324000	33923000	48337000	61196000	111520000	139130000	81332000	61197000
AT1G20450	21529000	0	0	0	0	0	11462000	0	0	0	0	0	0	0	0	0	0	8225000	13023000	0	0	0	0	12628000	10570000	0	0	0	0	0	0	0	0	0	0	9069000	0	27230000	0	0
AT1G20580	9126000	0	8106800	0	8479100	6700600	0	0	0	0	0	0	0	7486200	0	0	0	0	18232000	0	0	0	0	9301000	0	0	0	0	0	0	0	0	0	17344000	0	5112600	0	0	0	0
AT1G20620	415710000	377840000	636830000	396740000	916400000	784550000	816420000	754700000	658340000	485770000	694060000	1365300000	979460000	1000600000	672980000	964510000	0	1382200000	191130000	32107000	81489000	0	170240000	225200000	226020000	120250000	210390000	0	234760000	0	0	0	107300000	104090000	105030000	99903000	156930000	150850000	105100000	121830000
AT1G20950	34686000	0	0	0	7452600	0	5843900	0	0	0	0	12050000	0	0	0	0	0	2786500	11134000	0	0	0	0	10920000	12969000	0	3287200	0	5291000	0	0	0	0	6935300	5246800	94200000	0	13093000	0	15506000
AT1G20960	0	0	0	0	6369300	5741800	15933000	0	0	0	0	24270000	11003000	12749000	0	0	0	17645000	0	0	0	0	12721000	6834400	0	0	0	0	0	0	0	0	7274100	6677000	0	7333300	0	5684500	0	0
AT1G21440	46185000	0	18950000	0	21327000	13343000	15935000	14016000	0	0	0	10347000	11317000	0	0	14578000	0	11925000	32912000	0	9328700	0	20332000	30371000	17743000	18117000	21648000	0	38339000	0	0	0	13355000	16046000	0	14477000	27848000	22080000	23496000	22421000
AT1G21720	12880000	0	14625000	0	11610000	2954000	0	0	0	0	0	8860900	15909000	0	0	0	0	16233000	24729000	0	12377000	0	0	22574000	5208800	0	0	0	0	0	0	0	0	0	0	12990000	16960000	7310700	16738000	0
AT1G21750	132710000	0	34317000	9469200	44505000	29330000	66708000	57493000	50346000	0	40269000	96585000	45321000	53279000	29819000	52578000	0	48799000	92913000	0	36302000	0	86708000	80773000	72545000	39141000	45666000	0	72496000	0	0	0	63161000	53536000	50840000	70485000	130930000	125830000	94644000	85020000
AT1G22300	192170000	0	0	0	24792000	18474000	29421000	32320000	0	0	0	24753000	18871000	20794000	0	0	0	19611000	39671000	0	0	0	22003000	49042000	40973000	21535000	30200000	0	0	0	0	0	0	34507000	0	31530000	28334000	28285000	0	13471000
AT1G22410	91030000	0	0	0	0	0	21951000	0	0	0	0	8130900	12432000	0	0	0	0	6249000	0	0	0	0	0	23313000	7449400	0	0	0	0	0	0	0	0	5097700	0	246740000	20984000	32601000	54984000	48476000
AT1G22440	13274000	0	0	0	0	0	0	0	0	0	0	0	0	0	0	0	0	0	5893400	0	0	0	0	4953300	0	0	5045400	0	0	0	0	0	5426100	0	0	7719600	8562900	6584300	9065300	10467000
AT1G22450	8524600	0	0	0	8776500	0	0	10107000	0	0	0	8451300	0	0	0	0	0	0	10855000	0	0	0	0	8230100	10756000	0	0	0	0	0	0	0	0	0	0	0	15168000	11197000	0	0
AT1G22530	13933000	0	0	0	0	0	0	0	0	0	0	0	0	0	0	0	0	0	5632100	0	0	0	0	4907700	8774100	0	0	0	0	0	0	0	0	4664900	0	83435000	23734000	46655000	20041000	25408000
AT1G23190	70705000	0	14188000	0	25845000	14098000	33280000	33950000	28604000	0	0	34178000	39287000	53327000	25502000	0	0	34050000	27631000	0	0	0	14131000	27249000	16808000	19053000	16090000	0	36461000	0	0	0	18619000	20972000	18633000	68902000	32437000	27002000	28139000	49867000
AT1G23280	19075000	0	0	31143000	0	0	0	0	24181000	0	0	0	8728300	38677000	45259000	84015000	0	25503000	0	0	0	0	0	0	12541000	45682000	15535000	0	0	0	0	0	19920000	13060000	0	0	72238000	169600000	79860000	21175000
AT1G23290.1	306160000	10491000	304570000	2645800	109650000	0	13049000	371210000	159810000	35556000	159970000	0	40528000	210880000	139890000	0	113200000	25688000	514420000	332930000	0	254350000	4313900	177480000	881420000	497500000	0	68851000	0	0	248920000	578120000	251890000	206700000	0	0	543230000	93891000	77077000	239180000
AT1G23310	17771000	0	34365000	10185000	128500000	90455000	196150000	134160000	76998000	34690000	93292000	240810000	106320000	78145000	13849000	43951000	0	101660000	0	0	0	0	0	0	2494600	0	0	0	0	0	0	0	0	0	0	9140300	0	0	0	5973500
AT1G23740	0	0	0	0	11287000	0	0	0	0	0	0	0	0	8529600	0	0	0	6851700	0	0	0	0	0	0	0	0	0	0	0	0	0	0	0	0	0	0	0	0	0	0
AT1G23800.1	0	0	0	0	0	0	0	0	0	0	8139500	0	0	0	0	0	6870100	0	0	0	0	0	6697700	8523600	0	7571400	0	0	0	0	0	0	0	0	8775200	8421600	14832000	8156000	11411000	0
AT1G23820	35972000	0	0	0	9068200	6835000	9104900	0	0	0	0	7409700	13085000	9346800	0	0	0	7125900	9301600	0	0	0	6736500	18687000	7919700	9358600	0	0	19310000	0	0	0	3969200	7697200	0	55955000	12022000	10261000	0	13144000
AT1G24020	0	0	0	0	20645000	9950000	8534000	0	0	0	0	8454800	10244000	0	0	0	0	0	0	0	0	0	0	0	0	0	0	0	0	0	0	0	0	0	0	0	0	0	0	0
AT1G24100	12595000	0	4187000	0	5236500	4626600	5957100	0	0	0	0	4513300	5940200	0	0	0	0	0	7509300	0	0	0	0	7437500	6515000	0	0	0	0	0	0	0	0	0	0	5635500	4000700	3221500	3956800	5422500
AT1G24180	110010000	0	0	0	16003000	3619000	22221000	0	0	0	0	3884300	23783000	0	0	0	0	5059100	32382000	0	0	0	15594000	49248000	8802700	0	8692600	0	31140000	0	0	0	14939000	22429000	0	220330000	9765600	18643000	46033000	63718000
AT1G24240.1;AT4G11630.1;AT5G11750.1	0	31113000	42010000	0	15190000	0	64054000	0	0	0	25316000	0	38111000	13917000	0	0	21435000	5892900	22948000	0	0	16195000	4302000	176660000	26920000	28130000	0	0	0	0	0	24169000	12234000	25575000	5866600	144570000	262170000	22899000	24363000	37125000
AT1G24360	22263000	0	0	0	0	0	90678000	0	0	0	0	106330000	41262000	99956000	0	0	0	132470000	55751000	0	0	0	172630000	62916000	117740000	0	0	0	0	0	0	0	0	68352000	0	148510000	56088000	129740000	0	145290000
AT1G24510	85452000	0	0	0	13528000	4015900	21566000	0	0	0	0	0	27301000	0	0	0	0	16625000	14808000	0	0	0	0	33256000	5526700	9288600	0	0	0	0	0	0	7479600	7425800	0	79372000	19074000	10482000	22127000	25913000
AT1G25260.1	0	0	0	0	0	0	0	32601000	0	0	0	0	0	42971000	80902000	0	22223000	0	0	0	0	0	0	11098000	73146000	30185000	0	0	0	0	0	21548000	15222000	0	0	0	20399000	53491000	14324000	14942000
AT1G25490	16121000	0	0	0	0	0	0	0	0	0	0	0	7248200	0	0	0	0	7026700	0	0	0	0	0	7331000	5501200	5731300	0	0	0	0	0	0	0	0	0	18283000	8573300	5953400	6257100	10313000
AT1G26630.1;AT1G26630.2;AT1G13950.1	0	9438900	0	16169000	9523800	0	21308000	0	0	0	8535000	16559000	0	0	0	0	10172000	25620000	0	0	0	0	25878000	11116000	0	20820000	0	0	0	0	0	0	6808100	0	10841000	23849000	20991000	21001000	18622000	12137000
AT1G26740	41991000	0	0	0	0	11701000	0	16218000	0	0	0	0	0	0	0	0	0	7946100	0	0	8479100	0	0	0	28266000	0	11406000	0	0	0	0	0	0	0	0	0	71298000	79166000	0	19833000
AT1G26750	44689000	0	0	0	0	17838000	11823000	0	0	0	0	29893000	0	0	0	0	0	13628000	41372000	0	0	0	0	29853000	10192000	0	11066000	0	0	0	0	0	9720300	16121000	0	0	0	0	0	0
AT1G26850.2;AT1G26850.1;AT1G26850.3	0	0	0	22667000	0	5964100	0	0	0	0	0	0	0	0	0	0	0	0	0	0	0	0	0	0	0	0	0	0	0	0	0	0	0	0	18528000	0	3424900	0	5824300	4503800
AT1G26880.1;AT1G26880.2	202760000	0	154600000	0	60426000	0	0	180880000	76317000	0	65954000	0	17733000	123260000	87868000	0	105530000	13506000	282180000	243460000	0	52986000	2674900	65840000	323800000	275180000	0	0	0	0	0	205650000	83446000	70875000	0	21568000	272230000	70309000	79108000	109190000
AT1G26910.1	0	0	0	0	0	0	0	0	0	0	0	0	0	0	0	0	13126000	0	19532000	33969000	0	0	0	0	63797000	26712000	0	0	0	0	0	26824000	0	0	0	0	13812000	0	0	6693300
AT1G27020	0	0	5745100	0	10553000	0	0	10277000	0	0	0	8818400	7795600	0	8446700	0	0	8734500	0	0	0	0	0	0	0	0	0	0	0	0	0	0	0	0	0	0	0	0	0	0
AT1G27030	10811000	0	0	0	0	0	0	0	0	0	0	0	0	0	0	0	0	0	0	0	0	0	0	5394300	0	0	0	0	0	0	0	0	0	0	0	4730800	0	0	0	0
AT1G27130	16460000	0	0	0	10897000	0	0	0	0	0	0	0	0	0	0	0	0	0	17016000	0	0	0	0	20859000	11566000	0	12132000	0	0	0	0	0	0	9008700	0	12362000	0	13851000	0	7716200
AT1G27435	7311300	0	0	0	0	0	0	0	0	0	0	0	0	0	0	0	0	0	0	0	0	0	0	0	37752000	0	0	0	0	0	0	0	0	0	0	0	0	53199000	0	0
AT1G27450	45139000	0	5088000	0	14957000	6095600	17273000	0	0	0	0	4983900	0	8494500	0	0	0	8959200	9588500	0	0	0	9895400	28585000	7326500	0	8411300	0	0	0	0	0	0	0	0	17549000	7150100	8916000	0	17150000
AT1G27970	64962000	0	0	0	7697800	0	9192300	0	0	0	0	0	9340300	0	0	0	0	16480000	7524700	0	0	0	0	18098000	8129100	0	0	0	0	0	0	0	8160400	7597300	0	55612000	8867500	5692000	25596000	31382000
AT1G28290	117320000	0	0	0	14390000	9626000	0	0	0	0	0	11287000	0	0	0	0	0	0	40975000	0	16919000	0	53717000	34469000	18400000	19229000	19549000	0	56554000	0	0	0	41231000	40050000	56079000	93654000	15431000	24709000	25171000	24045000
AT1G29150	35406000	0	0	0	29622000	0	53809000	0	0	0	0	7795800	94489000	13751000	0	0	0	5865100	10561000	0	0	0	0	42530000	10441000	0	3232800	0	0	0	0	0	1938800	0	0	241530000	3623200	14567000	25175000	32259000
AT1G29250	0	0	0	0	0	0	0	0	0	0	0	0	0	0	0	0	0	0	23946000	0	0	0	37938000	14698000	25266000	22777000	30615000	0	25591000	0	0	0	0	0	0	0	0	0	0	0
AT1G29320	17194000	0	5337100	0	0	0	0	0	0	0	0	2991200	0	61229000	59082000	115860000	0	19402000	0	0	0	0	0	0	30583000	39143000	13030000	0	7862000	0	0	0	13535000	11441000	0	0	321150000	530630000	90511000	39530000
AT1G29880	25742000	13544000	12900000	0	18415000	17767000	21505000	19175000	9872500	0	0	5216800	15617000	18034000	0	0	0	22576000	11262000	0	0	0	11327000	19025000	12087000	14767000	0	0	18061000	0	0	0	0	13088000	0	13659000	3821600	3591100	0	9636500
AT1G29900	44003000	0	0	0	19574000	11994000	34647000	19723000	0	0	0	18824000	25152000	26457000	0	9259900	0	37173000	8612400	0	0	0	0	16012000	12796000	9336100	2893400	0	0	0	0	0	0	5516600	0	22817000	0	12818000	12061000	18607000
AT1G29930	8002400	9094500	0	0	160540000	62211000	0	26198000	0	0	0	3031300	131980000	0	0	0	0	161780000	0	0	0	0	0	0	0	0	0	0	0	0	0	0	0	0	0	0	0	0	0	0
AT1G30120	0	0	95315000	0	41662000	0	70161000	0	0	0	0	0	82188000	0	0	0	0	0	63318000	0	0	0	0	179260000	79806000	50477000	0	0	0	0	0	0	12096000	8616300	0	6907200	0	0	0	0
AT1G30230.1;AT1G30230.2	16295000	27890000	11895000	44885000	35821000	42599000	45370000	12074000	0	25423000	85912000	50489000	44665000	14001000	26300000	0	83877000	29887000	0	8790500	0	19936000	44355000	42117000	20321000	25553000	0	60689000	0	0	0	22641000	21204000	13235000	190490000	128280000	84956000	77206000	67884000	63121000
AT1G30360	0	0	0	0	0	0	5118300	0	0	0	0	0	6202000	0	0	0	0	0	0	0	0	0	0	15127000	0	0	0	0	0	0	0	0	0	4348000	0	12924000	0	0	0	6092500
AT1G30510	16941000	0	0	0	0	0	0	0	0	0	0	0	0	0	0	0	0	0	27533000	0	0	0	17048000	22317000	12700000	0	9088100	0	0	0	0	0	0	0	0	0	20209000	19151000	0	29457000
AT1G30580	139680000	0	10202000	0	12470000	11127000	26153000	0	0	0	0	3978500	20790000	18145000	0	0	0	23532000	15209000	0	0	0	4363800	16760000	20819000	8677400	15247000	0	0	0	0	0	13142000	14161000	0	177890000	27243000	18638000	45541000	55535000
AT1G30630	190380000	0	3590600	0	95165000	3423200	96896000	11837000	5518400	0	0	3273400	118840000	24585000	0	3677700	0	19660000	29229000	0	5671300	0	5757500	152740000	22769000	10847000	10604000	0	12170000	0	0	0	20119000	13442000	0	430760000	206760000	104630000	186190000	143910000
AT1G31230	18237000	0	0	0	5342000	0	4137600	0	0	0	0	4045300	0	4110900	0	0	0	0	0	0	0	0	0	3765400	0	0	0	0	0	0	0	0	0	0	0	25838000	0	0	0	3751900
AT1G31330	0	0	13432000	0	36014000	17464000	33668000	24619000	11504000	0	0	16935000	65194000	37799000	0	16663000	0	29827000	0	0	0	0	0	0	0	0	0	0	0	0	0	0	0	0	0	0	0	0	0	0
AT1G31812	18960000	0	0	0	19836000	13135000	11564000	0	0	0	0	8834800	10264000	0	0	0	0	0	14784000	0	0	0	0	28606000	22336000	0	23666000	0	0	0	0	0	0	0	0	12613000	28724000	19217000	0	13590000
AT1G31817.1	0	0	0	0	9130800	0	0	0	0	0	16580000	0	0	0	0	0	5223700	23708000	0	0	0	0	19895000	8218000	4234800	0	0	0	0	0	0	0	0	0	12125000	0	0	0	5858800	16158000
AT1G32060	0	23338000	27017000	15073000	221970000	189620000	159030000	75583000	46487000	0	39681000	114510000	69787000	57407000	0	31811000	0	175660000	0	0	0	0	0	7657400	0	0	0	0	0	0	0	0	0	0	0	0	0	0	0	0
AT1G32990.1	455470000	4869700000	1759000000	61014000	454730000	48830000	2412500000	1006500000	342800000	159930000	319260000	45908000	3305900000	450360000	438420000	0	361280000	27404000	0	0	0	11064000	0	168950000	35882000	20946000	0	20732000	0	84849000	0	16552000	8914100	0	0	104410000	48416000	6060900	7668000	6565000
AT1G33140.1;AT1G33120.1	4457800000	270080000	3768000000	79717000	2725800000	143080000	298540000	6315800000	4621000000	1559200000	2509700000	103740000	805640000	4128500000	2612400000	0	2894600000	310240000	8825000000	6739000000	0	4529100000	130940000	2942700000	11801000000	7190400000	0	1808100000	197400000	919810000	6497700000	6255800000	4124000000	3549900000	157840000	277960000	9161100000	2371100000	2154700000	3425200000
AT1G33590	20896000	0	9839900	0	25302000	8502700	22916000	17540000	15229000	0	0	13670000	20485000	13451000	11904000	15455000	0	9751000	6846100	0	0	0	0	13944000	6232800	0	0	0	0	0	0	0	4429000	7255300	0	21558000	5756400	6926700	6217100	11789000
AT1G34430	15141000	0	441530000	67664000	636820000	22291000	649370000	210090000	41879000	0	0	3523800	729180000	256400000	30998000	14190000	0	13379000	540110000	26014000	11855000	0	0	458870000	387320000	159150000	65788000	0	47984000	32465000	0	69449000	49253000	12433000	0	84026000	13265000	5581400	25666000	17123000
AT1G35160	3159800	0	0	0	9011300	0	0	0	0	0	0	0	0	0	0	0	0	0	0	0	0	0	0	10643000	12698000	0	0	0	0	0	0	0	0	0	0	0	0	0	0	0
AT1G35580	73896000	0	0	0	9393200	0	14903000	0	0	0	0	0	0	0	0	0	0	10586000	53926000	0	10111000	0	13478000	26769000	11625000	13220000	14458000	0	13988000	0	0	0	18029000	0	0	37180000	24764000	26525000	30286000	26593000
AT1G35680.1	302210000	1602900000	1243800000	14343000	202300000	19091000	2142100000	425760000	159440000	89429000	172750000	45704000	833180000	109460000	86744000	0	154070000	13282000	0	5938300	0	0	0	116460000	19511000	14457000	0	0	0	0	0	0	0	0	0	104970000	46790000	0	0	0
AT1G35720	896850000	60203000	199590000	76398000	242840000	193760000	218170000	168120000	149370000	26415000	75518000	164140000	223080000	163660000	161360000	195590000	0	247620000	401840000	58785000	125720000	0	258460000	514850000	236050000	174330000	286850000	0	334940000	45257000	0	0	190210000	276320000	158340000	429120000	808990000	736010000	395330000	667810000
AT1G36160	17121000	0	0	0	4286500	0	1511400	0	0	0	0	0	4510300	0	0	0	0	0	2449900	0	0	0	0	3285300	0	0	0	0	0	0	0	0	0	0	0	85539000	0	0	0	2491900
AT1G37130	2976900	0	0	0	6864600	4691300	13631000	0	0	0	0	8182900	14143000	0	0	0	0	15132000	0	0	0	0	0	3630100	0	0	0	0	0	0	0	0	0	0	0	28707000	0	4940400	5704100	0
AT1G41880.1	144980000	0	167200000	0	89771000	0	0	0	240080000	94145000	25809000	0	31951000	243720000	194220000	0	147740000	0	296540000	0	0	224380000	0	68629000	713360000	233030000	0	84078000	0	0	533810000	0	291330000	186240000	0	0	81062000	155600000	0	102090000
AT1G42970	0	44012000	100160000	16275000	297510000	163230000	236650000	234610000	123590000	17027000	145990000	247880000	271500000	207320000	83864000	76746000	0	166370000	3155700	0	0	0	0	2439200	7349800	0	0	0	0	0	0	0	0	0	0	4248400	0	0	0	0
AT1G43170.9;AT1G43170.8;AT1G43170.7;AT1G43170.6;AT1G43170.5;AT1G43170.3;AT1G43170.2;AT1G43170.1;AT1G43170.4	6826800000	308960000	5065500000	74656000	3725100000	115280000	313470000	5918300000	6001700000	1947500000	2589400000	83489000	787700000	4442900000	2957000000	0	3713100000	400540000	9182500000	9930300000	0	4575800000	139240000	4280900000	14776000000	8684000000	19332000	1512200000	44581000	404020000	6950400000	7786600000	6786500000	3513600000	133110000	490260000	9919300000	3053100000	2827800000	3917200000
AT1G43670.1	9157600	22954000	8166500	16119000	15335000	11666000	14218000	0	0	0	11797000	18057000	0	12801000	22425000	0	16089000	0	0	0	0	0	0	0	0	0	0	0	0	0	0	0	0	0	0	0	0	0	0	3004800
AT1G44575	0	0	0	0	19165000	0	0	0	0	0	0	17796000	0	0	0	0	0	9881800	0	0	0	0	0	0	0	0	0	0	0	0	0	0	0	0	0	0	0	0	0	0
AT1G45145	52265000	0	0	0	12582000	0	16954000	0	0	0	0	0	9626600	0	0	0	0	0	71558000	0	17713000	0	0	74358000	36408000	29802000	30560000	0	47985000	0	0	0	28407000	36643000	0	49201000	33866000	23935000	34934000	51635000
AT1G45201	30498000	0	0	0	85657000	23937000	42401000	0	0	0	0	19215000	29529000	0	0	0	0	12332000	0	0	0	0	0	15523000	10383000	0	0	0	0	0	0	0	0	6149400	0	43882000	0	11325000	0	25939000
AT1G47128	64015000	0	0	0	34039000	0	33879000	32519000	0	0	0	39369000	31132000	28265000	0	0	0	19271000	26492000	0	0	0	27172000	33318000	37428000	0	24009000	0	33023000	0	0	0	16725000	17600000	0	49071000	77096000	54641000	33768000	34986000
AT1G47200	0	0	0	0	5159600	0	0	0	0	0	0	4296800	0	0	0	0	0	0	4954000	0	0	0	0	0	7223400	0	0	0	0	0	0	0	0	0	0	4023800	5326100	6286700	0	0
AT1G47260	12963000	0	0	0	23669000	0	7800600	0	0	0	0	5230400	28631000	12569000	0	0	0	5915500	15488000	0	0	0	0	24307000	8948400	5421800	0	0	0	0	0	0	0	0	0	22259000	0	11645000	0	5150500
AT1G47420	7248900	0	4610500	0	4784200	0	6933800	0	0	0	0	0	0	0	0	0	0	0	12117000	0	0	0	0	11312000	4512100	0	7221500	0	14092000	0	0	0	4008200	0	0	10784000	0	6134900	12046000	12435000
AT1G47600	0	0	0	0	0	0	0	0	0	0	0	0	0	0	0	0	0	0	26683000	0	0	0	0	12690000	7403500	0	0	0	0	0	0	0	0	0	0	0	6796200	5894100	0	4762300
AT1G48030	17941000	7857000	29414000	9971600	27493000	15551000	22319000	20829000	16241000	0	21300000	20073000	22347000	27116000	18676000	17293000	0	24347000	16149000	0	0	0	14360000	16395000	14636000	13750000	10905000	0	0	0	0	0	12027000	11448000	0	11188000	13604000	12988000	23185000	13982000
AT1G48350.1	145590000	1741300000	655240000	0	268880000	0	790520000	151420000	88657000	94262000	161840000	7825300	660570000	41002000	48386000	0	142200000	7421000	0	0	0	0	0	65202000	0	0	0	0	0	0	0	0	0	0	16027000	21383000	25698000	0	7530500	4458300
AT1G48420	7570500	0	0	0	5292800	0	5932700	8078400	0	0	0	0	4933200	0	0	0	0	5367700	0	0	0	0	0	5779600	0	0	0	0	0	0	0	0	0	0	0	4251300	0	0	0	5155900
AT1G48600	73342000	0	0	0	10806000	6785300	0	0	0	0	0	0	0	0	0	0	0	0	24529000	0	0	0	0	22234000	13853000	0	14622000	0	0	0	0	0	16295000	12831000	0	75354000	21500000	16139000	39022000	47596000
AT1G48630.1	0	0	0	31718000	0	31730000	0	0	0	0	51632000	18544000	0	0	0	0	37578000	118830000	0	0	0	25683000	73656000	42344000	0	18717000	0	0	0	0	0	0	0	0	13254000	27222000	25965000	0	23567000	24012000
AT1G48830.2;AT1G48830.1	172650000	345800000	152850000	164240000	677830000	392920000	174350000	182610000	124870000	352210000	372140000	330350000	105170000	0	53272000	0	760490000	1373500000	140460000	486870000	0	917530000	1581800000	557520000	272880000	851990000	0	178420000	587990000	0	0	361230000	941590000	535470000	160720000	56371000	60196000	44685000	228620000	549700000
AT1G48850.1;AT1G48850.3;AT1G48850.2	0	0	0	0	0	15306000	0	0	0	0	16302000	8406400	12055000	0	0	0	11672000	8548400	0	0	0	0	9680000	10311000	0	0	0	0	0	0	0	0	0	0	7067500	0	13096000	0	14572000	9982400
AT1G48900	3782800	0	0	0	3822200	0	5488900	0	0	0	0	0	14988000	4072900	0	0	0	0	0	0	0	0	0	6174100	0	0	0	0	0	0	0	0	0	0	0	11680000	0	2767600	0	0
AT1G48920.1	0	0	0	0	13262000	0	0	0	0	0	0	11061000	6554400	0	0	0	88758000	0	0	0	0	20169000	0	0	0	0	0	0	0	0	0	3743400	6671400	0	0	0	3605900	0	0	0
AT1G49670	5108500	0	0	0	7927500	0	15998000	0	6399800	0	0	3636200	19830000	10406000	0	0	0	8087100	7731700	0	0	0	0	16480000	9514100	0	0	0	0	0	0	0	0	0	0	6031900	0	0	0	0
AT1G49760	32873000	0	0	0	7771100	0	6991900	0	0	0	0	0	0	6541600	0	0	0	7351200	9455200	0	0	0	0	9063600	9974700	0	0	0	0	0	0	0	0	7037600	0	20834000	0	24244000	0	19377000
AT1G50200	9458000	0	0	0	4810000	3835700	0	0	0	0	0	0	0	4302300	0	0	0	0	4845300	0	0	0	0	0	0	0	0	0	0	0	0	0	0	3925300	0	0	0	0	0	4031800
AT1G50480	170460000	39150000	97326000	57667000	104060000	76657000	144640000	136190000	142990000	0	45215000	138300000	96172000	107450000	79781000	113140000	0	103700000	59197000	0	40581000	0	74247000	64947000	45539000	36068000	46965000	0	79164000	0	0	0	54105000	61687000	0	51144000	64079000	52150000	75329000	53025000
AT1G50920.1	33583000	0	53473000	0	10881000	2751100	0	122950000	100950000	53207000	21149000	16992000	96793000	489270000	439860000	0	98626000	0	21386000	0	0	0	1775200	83948000	272880000	90728000	0	0	0	0	117060000	146430000	63647000	0	41412000	32359000	676230000	389390000	143420000	28763000
AT1G51470	0	0	0	0	0	0	0	0	0	0	0	0	0	0	0	0	0	0	12504000	0	0	0	0	7117100	2942500	0	0	0	0	0	0	0	0	0	0	4038100	0	3974500	0	0
AT1G51650.1	0	0	0	53274000	0	49275000	0	0	0	0	0	76415000	12259000	0	0	0	9095000	11760000	0	0	0	0	62018000	9756400	17992000	16639000	0	0	0	0	0	0	9545900	0	12562000	6839700	0	0	15136000	0
AT1G51760	15562000	0	0	0	13931000	5872500	15253000	0	7157300	0	0	10721000	10065000	0	8998000	10918000	0	16569000	7607200	0	0	0	0	9875900	3975000	0	0	0	0	0	0	0	0	0	0	11507000	0	7944600	8066400	0
AT1G51980	62765000	0	0	0	10450000	4275000	11487000	0	0	0	0	8747700	8472900	10393000	0	0	0	0	8702400	0	0	0	0	22818000	8238600	0	4309400	0	0	0	0	0	0	0	0	152670000	9620300	15356000	14501000	39641000
AT1G52230	0	0	0	0	88847000	11423000	0	0	0	0	0	0	108970000	0	0	0	0	0	0	0	0	0	0	0	0	0	0	0	0	0	0	0	0	0	0	0	0	0	0	0
AT1G52300.1;AT3G16080.1;AT1G15250.1	982390000	91810000	756560000	0	163670000	0	46622000	824860000	722910000	563540000	165250000	0	119770000	704160000	272610000	0	224630000	20555000	611880000	678780000	0	241750000	28151000	726910000	899920000	904560000	0	95494000	0	221760000	1457300000	290680000	542150000	174340000	0	0	550600000	119810000	177680000	522690000
AT1G52400	1432600	49632000	193830000	61921000	635350000	265430000	375190000	47417000	44276000	0	17045000	122370000	87349000	21748000	14834000	48293000	0	422930000	2736300	0	0	0	0	2777700	0	0	0	0	0	0	0	0	0	0	0	0	0	5666500	0	0
AT1G52410	0	0	18014000	0	21889000	14725000	10175000	0	0	0	0	12165000	0	0	0	0	0	0	0	0	0	0	0	0	0	0	0	0	0	0	0	0	0	0	0	0	0	0	0	0
AT1G52760	11404000	0	0	0	0	0	5919300	0	0	0	0	0	6510900	0	0	0	0	0	6782100	0	0	0	0	7254500	5895600	0	0	0	0	0	0	0	0	5398600	0	10589000	0	6127500	0	9810900
AT1G52980.1	0	0	0	0	0	0	0	25194000	49155000	0	0	0	4700700	93087000	81764000	0	5785600	0	5623700	0	0	0	0	3572300	68030000	9217100	0	0	0	0	29722000	26620000	8205100	0	7412500	0	198300000	88168000	40354000	5943300
AT1G53240	293390000	0	57690000	0	120540000	35176000	37323000	50034000	0	0	0	51736000	31693000	28315000	0	45864000	0	73430000	31584000	0	34597000	0	76843000	81555000	38487000	0	48550000	0	0	0	0	0	23130000	0	0	26438000	46501000	50312000	80693000	63543000
AT1G53310	88636000	0	0	0	18500000	5380600	22015000	0	0	0	0	13658000	22950000	4995000	0	0	0	12111000	13563000	0	0	0	0	22678000	4904100	11600000	9430500	0	0	0	0	0	10530000	9518300	9272200	213570000	13935000	8913700	23377000	39848000
AT1G53580.1;AT1G53580.2	0	0	0	7195800	0	0	0	0	0	0	0	0	0	0	0	0	0	9119100	0	0	0	0	6360800	4778400	0	0	0	0	0	0	0	4404100	4157500	0	7376600	0	0	0	0	0
AT1G53645	67868000	0	0	0	0	0	0	0	0	0	0	12452000	0	0	0	0	0	11905000	21074000	0	0	0	0	15231000	0	0	0	0	0	0	0	0	0	0	0	0	0	0	0	0
AT1G53750	57368000	0	0	0	50483000	0	50237000	0	0	0	0	13006000	52908000	0	0	0	0	8498000	11130000	0	0	0	0	30372000	9395000	0	10531000	0	0	0	0	0	8849500	12157000	0	121630000	20608000	14516000	14046000	27563000
AT1G53850	17431000	0	0	0	0	0	0	0	0	0	0	4810100	0	0	0	0	0	9173400	0	0	6133500	0	0	19714000	5617100	0	0	0	0	0	0	0	0	0	0	19019000	9019100	9509100	9598900	14368000
AT1G54000	40779000	0	0	0	0	0	0	0	0	0	0	0	0	0	0	0	0	12531000	0	0	0	0	15540000	0	0	0	0	0	36116000	0	0	0	0	20102000	0	0	0	0	0	9557600
AT1G54010	5439400	0	2772300	0	0	6779600	0	0	0	0	0	0	7390600	0	0	10685000	0	166540000	0	0	0	0	0	0	0	0	0	0	0	0	0	0	0	0	0	0	0	0	0	0
AT1G54100	47977000	0	0	0	0	8865600	15534000	17962000	0	0	0	0	15610000	17177000	0	0	0	17032000	14462000	0	0	0	0	20796000	18157000	11125000	17363000	0	22899000	0	0	0	0	0	20045000	17024000	9587800	15700000	15159000	18928000
AT1G54220	3098700	0	9660300	0	561670000	0	243460000	0	0	0	0	0	410870000	0	0	0	0	0	125330000	0	0	0	0	17918000	0	0	0	0	0	50329000	0	0	0	2978000	0	7209300	0	0	0	3687900
AT1G54270.1;AT1G54270.2	0	0	0	4504100	0	0	0	0	0	0	0	10899000	0	0	0	0	0	0	0	0	0	0	11888000	5981600	0	0	0	0	0	0	0	0	0	0	28003000	0	7490300	0	0	0
AT1G54410	5910700	0	0	0	12034000	0	0	0	0	0	0	0	0	0	0	0	0	0	19522000	0	0	0	0	0	0	0	14891000	0	0	0	0	0	0	0	0	0	0	10417000	0	0
AT1G55020	71052000	0	0	0	1948100	0	0	0	0	0	0	0	0	0	0	0	0	0	23050000	0	0	0	10917000	80860000	21299000	9824900	8222100	0	18731000	0	0	0	7274200	15403000	0	47064000	26928000	31644000	17586000	34477000
AT1G56070.1	100230000	191300000	120800000	309600000	261220000	340490000	378620000	216050000	158060000	174020000	201230000	247020000	310770000	184170000	260400000	0	364590000	336470000	43886000	111940000	0	251270000	366820000	190110000	184960000	257570000	0	420160000	205540000	28282000	60069000	242840000	391710000	327670000	265820000	346350000	344320000	301970000	524580000	392210000
AT1G56110	50946000	0	0	0	0	7533200	13241000	0	22236000	0	0	20367000	33425000	31332000	34861000	65178000	0	52102000	0	0	0	0	0	21746000	14267000	39401000	17892000	0	51163000	0	0	0	19238000	9869200	0	69199000	32534000	75710000	42868000	29462000
AT1G56190.2;AT1G56190.1	0	0	0	4578700	4113800	0	0	0	0	0	0	0	0	0	0	0	4679900	0	0	0	0	0	0	0	0	0	0	0	0	0	0	0	0	0	0	0	0	0	0	0
AT1G56330	45146000	0	8925600	0	16037000	8885600	30031000	13178000	0	0	0	12138000	17121000	10361000	0	0	0	10371000	17248000	0	0	0	0	24994000	28222000	11248000	0	0	0	0	0	0	0	16412000	7419900	45122000	10472000	13035000	0	0
AT1G56340	42845000	0	14732000	0	15472000	12544000	15930000	19432000	10825000	0	0	0	16441000	15060000	0	0	0	10986000	27143000	0	12781000	0	32992000	29054000	21080000	0	19462000	0	0	0	0	0	14587000	17354000	0	37565000	29709000	22123000	20110000	29669000
AT1G56450	199650000	0	20261000	12742000	68868000	7989000	40947000	36833000	0	0	0	25587000	66149000	51589000	17020000	37619000	0	44547000	132690000	0	25056000	0	40347000	56453000	25407000	27863000	30647000	0	41760000	0	0	0	19174000	3987000	0	63928000	50206000	52678000	45047000	84425000
AT1G57720.2;AT1G57720.1	31648000	18588000	23403000	43291000	33372000	56508000	62242000	37388000	0	0	40149000	50605000	71731000	25752000	43617000	0	56278000	44196000	0	34023000	0	39906000	44545000	54521000	31421000	30993000	0	63353000	0	0	0	31742000	69214000	63763000	157260000	84400000	32094000	77032000	108200000	68671000
AT1G57860.1;AT1G57660.1	90369000	0	90150000	0	0	0	0	0	0	71170000	0	0	0	0	0	0	0	0	0	62244000	0	0	0	0	0	0	0	0	0	0	0	0	0	0	0	0	117230000	0	0	0
AT1G58270	13271000	0	0	0	0	0	0	0	0	0	0	0	0	0	0	0	0	0	8656600	0	0	0	0	8849800	0	0	0	0	0	0	0	0	0	0	0	18614000	9633800	9968100	0	0
AT1G59359.1;AT1G58983.1;AT1G58684.1;AT1G58380.1	124320000	229790000	160940000	104250000	596400000	389240000	236280000	168780000	94861000	292380000	373850000	344560000	93441000	46633000	65721000	0	588190000	1816600000	159430000	457880000	12190000	1365900000	1797900000	753000000	425350000	572170000	0	404880000	209780000	96392000	0	584080000	1457800000	274470000	286120000	57439000	91101000	18428000	146500000	468140000
AT1G59540	128060000	983020000	1693900000	880130000	850200000	117380000	0	0	1143300000	0	481560000	0	207330000	0	0	0	0	0	600420000	1449500000	0	0	0	60857000	0	0	113790000	0	0	0	0	0	0	54100000	0	0	0	0	996980000	463470000
AT1G59610	270780000	0	23807000	13976000	33197000	53171000	39353000	20692000	6290900	0	0	76176000	42243000	34664000	0	0	0	155550000	14558000	0	0	0	24329000	81233000	19323000	12367000	15763000	0	23358000	52431000	0	0	22978000	35301000	10363000	21215000	12919000	50326000	69270000	102190000
AT1G59870	26131000	0	3102800	0	22927000	6028900	48692000	14761000	0	0	0	19168000	45732000	12180000	0	0	0	12544000	19072000	0	0	0	0	21931000	12060000	4898100	3458300	0	8366700	47642000	0	0	12161000	23658000	5220100	91302000	6196600	7054400	9719600	8168000
AT1G59900	0	0	2184300	0	25124000	0	26671000	0	0	0	0	6920600	24912000	0	0	0	0	5353200	0	0	0	0	0	7610100	2277600	0	0	0	0	0	0	0	0	0	0	86055000	3284200	5018900	9409000	8754100
AT1G60420	12428000	0	0	0	0	0	0	0	0	0	0	0	0	0	0	0	0	0	10059000	0	0	0	0	0	10500000	0	8267100	0	0	0	0	0	0	0	0	7552800	0	9101700	0	8233800
AT1G60680	6533700	0	0	0	0	0	0	0	0	0	0	0	0	0	0	0	0	0	6727100	0	0	0	0	5180000	0	0	0	0	0	0	0	0	0	0	0	5627600	6651100	7701500	0	0
AT1G60710	10870000	0	0	0	0	0	0	0	0	0	0	0	0	0	0	0	0	0	27077000	0	0	0	0	12657000	11669000	0	0	0	0	0	0	0	0	0	0	0	23934000	16605000	0	0
AT1G60770	150260000	8331000	73709000	70692000	0	38018000	0	92294000	72213000	0	0	48685000	0	148250000	21774000	25429000	0	42600000	7567200	32238000	44119000	0	52799000	0	401580000	74398000	68499000	0	88527000	0	155500000	27083000	54381000	54900000	0	0	130090000	445940000	49956000	50858000
AT1G61520	0	0	0	23760000	133010000	65892000	72417000	40765000	36776000	0	0	29513000	140290000	59159000	0	36881000	0	65351000	0	0	0	0	0	5854300	0	0	0	0	0	0	0	0	0	0	0	0	0	0	0	0
AT1G61580.1	99576000	0	98190000	0	55950000	0	0	90331000	66805000	0	35283000	0	10239000	16196000	17458000	0	40178000	9037900	167090000	184260000	0	60225000	0	25806000	152110000	72751000	0	0	0	0	151330000	103610000	93253000	55477000	0	0	46820000	0	22080000	36560000
AT1G61790	5772300	0	0	0	2557100	0	7264800	0	0	0	0	0	9180400	0	0	0	0	0	0	0	0	0	0	0	0	0	0	0	0	0	0	0	0	0	0	13530000	0	0	0	0
AT1G61870	45405000	0	0	0	0	6960200	18020000	0	0	0	0	16171000	14134000	5126100	0	0	0	14590000	45233000	0	0	0	0	87229000	9710300	7695900	10072000	0	23832000	53166000	0	0	7369700	11111000	0	31563000	0	0	0	0
AT1G62020	45626000	0	0	0	14102000	0	24177000	0	0	0	0	5172200	31721000	7058900	0	0	0	0	2822500	0	0	0	0	11884000	0	0	0	0	0	8453500	0	0	8585400	7988600	0	149360000	19428000	25996000	28422000	27508000
AT1G62380	2589400	0	0	0	6246000	0	0	0	0	0	0	0	0	3958600	0	0	0	0	11099000	0	0	0	0	6536100	5071100	0	0	0	11057000	0	0	0	0	0	0	7189300	0	0	0	0
AT1G62480	20467000	22078000	0	30121000	46873000	30107000	48582000	47269000	49375000	25136000	25493000	11451000	15414000	23221000	0	36079000	0	9632700	40234000	0	20489000	0	0	23533000	27240000	21130000	19163000	0	41946000	22199000	0	0	28516000	27396000	0	13340000	27957000	18644000	29225000	28727000
AT1G62660	161070000	0	12499000	0	16359000	12353000	15920000	0	0	0	0	9084300	10179000	14220000	0	0	0	8608100	102110000	11581000	44018000	0	71980000	70473000	57499000	35033000	36974000	0	71092000	15843000	0	0	57106000	60158000	46774000	123430000	73338000	71956000	94898000	91516000
AT1G62750.1	0	13106000	0	26494000	10827000	21402000	18498000	0	0	0	15578000	20118000	19699000	14076000	14451000	0	20570000	0	0	0	0	0	0	0	0	0	0	0	0	0	0	0	0	0	0	5672700	0	0	0	0
AT1G62820	3395600	0	4078400	0	20014000	0	12668000	0	0	0	0	0	8102400	6270000	0	0	0	0	6110800	0	0	0	0	9489300	0	0	0	0	0	0	0	0	0	0	0	9910300	10436000	4710000	6389900	5048900
AT1G63000	62474000	0	0	0	8068500	0	10331000	0	0	0	0	7321300	4931200	0	0	0	0	4067600	11712000	0	0	0	0	18382000	11965000	9057000	0	0	0	0	0	0	11733000	7297600	0	146250000	21289000	16121000	23823000	30871000
AT1G63660	7446200	0	0	0	5320600	3854100	5927000	0	0	0	0	0	7837800	5891300	0	0	0	0	3565600	0	0	0	0	4062600	6078900	0	0	0	4294200	0	0	0	0	3166300	0	11805000	0	4939100	0	9118200
AT1G63770	89455000	0	29268000	0	40670000	25219000	40208000	30960000	43331000	0	0	21457000	36945000	41402000	31786000	54708000	0	38149000	23717000	0	6683500	0	27411000	30330000	19281000	15655000	21297000	0	39688000	0	0	0	27533000	30039000	26775000	27025000	24909000	24903000	46855000	45877000
AT1G63940	177880000	21480000	58301000	28927000	64331000	46013000	56365000	67229000	60873000	0	65791000	56482000	70065000	65736000	43723000	58228000	0	70119000	92689000	22391000	34822000	0	89869000	90747000	70633000	28954000	62693000	0	62926000	90096000	0	0	64870000	69987000	60915000	73552000	66303000	83680000	73301000	93987000
AT1G64160	9828700	0	0	0	0	0	0	0	0	0	0	0	0	0	0	0	0	0	0	0	0	0	0	0	0	0	0	0	0	0	0	0	0	0	0	13503000	0	2989500	0	4858500
AT1G64190	57783000	0	0	0	6916000	5907900	12955000	0	0	0	0	5540200	9535200	9899000	0	0	0	0	24491000	0	8419100	0	0	30098000	17921000	15350000	15128000	0	27805000	0	0	0	13431000	15037000	15917000	34524000	18295000	16161000	9961800	31524000
AT1G64200.1	0	7483200	0	49712000	0	14650000	0	0	0	0	0	19958000	11328000	0	0	0	0	25583000	0	0	0	0	26391000	0	0	6797000	0	0	0	0	0	0	9634100	0	15387000	10494000	0	0	0	0
AT1G64510.1	38660000	68854000	0	98338000	154240000	170820000	0	0	0	0	148190000	74681000	55585000	0	63218000	0	0	0	0	0	0	0	0	0	0	0	0	0	0	0	0	0	0	0	0	0	0	0	0	0
AT1G64520	22646000	0	0	0	35331000	0	44257000	9680300	0	0	0	8510400	82394000	26286000	0	0	0	10913000	21437000	0	0	0	0	25301000	10100000	0	0	0	0	0	0	0	4594000	6637100	0	178120000	40466000	73342000	44385000	28076000
AT1G64550	5602500	0	0	0	0	0	0	0	0	0	0	0	3827700	0	0	0	0	0	0	0	0	0	0	3538600	0	0	0	0	0	0	0	0	0	0	0	22690000	0	0	0	7438800
AT1G64710	0	0	0	0	4327900	0	5699800	0	0	0	0	0	3908000	0	0	0	0	3333600	0	0	0	0	0	0	0	0	0	0	0	0	0	0	0	0	0	0	0	0	0	0
AT1G64790	18998000	0	0	0	21250000	0	18462000	0	0	0	0	0	41135000	8971800	0	0	0	0	0	0	0	0	0	8886700	0	0	0	0	0	0	0	0	0	0	0	61708000	0	0	4602900	13844000
AT1G64880.1	0	0	0	3403200	21405000	18216000	0	0	0	0	14001000	11456000	0	0	0	0	13909000	60776000	0	5042900	0	27979000	52043000	6796200	0	8410100	0	20775000	0	0	0	10167000	12341000	0	37983000	5934900	0	6922800	25724000	36173000
AT1G65930	593410000	30879000	88144000	55907000	148520000	123240000	194200000	160900000	171760000	84096000	164490000	264440000	96152000	107480000	44903000	93077000	0	174830000	174240000	28996000	85208000	0	159940000	174580000	201880000	117840000	120000000	0	153580000	177250000	81300000	0	145970000	156100000	183970000	218980000	150110000	188840000	130460000	181370000
AT1G65960	20932000	0	0	0	40002000	22258000	42034000	48712000	34143000	0	0	16932000	22908000	24646000	16711000	21067000	0	28798000	18488000	0	0	0	17500000	15605000	5252400	7539500	0	0	0	0	0	0	14610000	20433000	21657000	17123000	9798100	0	13511000	20547000
AT1G65980	59584000	0	12725000	0	25945000	19115000	18193000	0	0	0	0	0	21983000	20015000	0	0	0	0	55760000	0	17171000	0	24389000	42488000	26596000	27306000	29220000	0	22716000	0	0	0	18225000	40499000	0	17593000	32611000	23174000	43213000	41415000
AT1G66200	517010000	13552000	7332700	20315000	63362000	38088000	40782000	39853000	0	0	0	21541000	39340000	29545000	0	0	0	98754000	84541000	0	33342000	0	0	211300000	11930000	33230000	54570000	0	0	0	0	0	42508000	25529000	0	97293000	34953000	36194000	115770000	196230000
AT1G66240	24069000	0	0	0	16664000	0	11603000	0	0	0	0	7973200	11821000	12021000	0	0	0	0	20815000	0	0	0	0	17198000	17963000	0	0	0	0	0	0	0	0	0	0	12299000	15004000	25633000	0	14225000
AT1G66270	150930000	0	0	0	0	0	0	0	0	0	0	0	0	0	0	0	0	0	192770000	0	48208000	0	62366000	251710000	165520000	68021000	106900000	0	0	0	0	0	85237000	69236000	0	216680000	128380000	99702000	87208000	93908000
AT1G66280	336890000	0	0	0	0	0	0	0	0	0	0	0	0	0	0	0	0	3628400	296280000	38783000	39478000	0	47247000	521890000	205430000	152990000	145020000	0	172700000	89399000	0	0	54358000	57846000	34975000	329180000	118950000	111120000	116120000	137590000
AT1G66580.1	110710000	0	98499000	0	94943000	0	0	0	73014000	32092000	21024000	0	0	60731000	17078000	0	71240000	5360300	213070000	203880000	0	0	0	22511000	226260000	256310000	0	0	0	0	383650000	191160000	139600000	47247000	0	0	52372000	16325000	69548000	39485000
AT1G66700	0	0	0	0	0	0	14920000	0	0	0	0	6721400	5708100	0	0	0	0	0	0	0	0	0	0	0	0	0	0	0	0	0	0	0	0	0	0	0	0	0	0	0
AT1G66970	0	0	6653200	0	7437800	4580300	12397000	10418000	0	0	0	0	0	5069700	0	7499300	0	0	0	0	0	0	0	0	0	0	0	0	0	0	0	0	0	0	0	0	0	0	0	0
AT1G67090	48835000	578210000	1714000000	701490000	2506500000	844460000	1982900000	1501500000	1376200000	1123100000	924730000	822440000	2989600000	2320400000	1705000000	2123800000	0	2008700000	176110000	0	34246000	0	66237000	122300000	68988000	73561000	73122000	0	93371000	0	0	0	37621000	40837000	26280000	43683000	18772000	15009000	36831000	45613000
AT1G67280	0	0	0	0	13016000	6675600	10683000	13718000	0	0	0	0	8938100	0	0	0	0	5361600	0	0	0	0	0	0	0	0	0	0	0	0	0	0	0	0	0	0	0	0	0	0
AT1G67680	16213000	0	0	0	0	0	0	0	0	0	0	0	6925100	7736200	0	0	0	0	10140000	0	0	0	9871800	11176000	0	0	0	0	0	0	0	0	0	0	0	15323000	0	8594000	4212000	4986600
AT1G67730	3159700	0	0	0	0	0	7322700	0	0	0	0	0	7102900	0	0	0	0	0	0	0	0	0	0	6570700	0	0	0	0	0	0	0	0	0	0	0	27746000	0	4693200	0	4067000
AT1G68010	0	44983000	41056000	0	111480000	48196000	51493000	74080000	35875000	0	0	62839000	40868000	46486000	0	0	0	50855000	0	0	0	0	0	0	0	0	0	0	0	0	0	0	0	0	0	0	0	0	0	0
AT1G68560	0	0	15335000	0	24314000	20300000	18351000	0	0	0	0	9564200	13937000	0	0	0	0	18178000	8388000	0	0	0	0	7364000	0	0	0	0	0	0	0	0	0	0	0	5370000	0	3421400	0	0
AT1G68590.1;AT1G68590.2	0	26542000	18726000	231980000	32090000	268660000	75896000	17320000	0	0	79775000	173860000	65278000	0	0	0	63376000	0	0	0	0	0	15508000	0	0	0	0	0	0	0	0	0	0	0	0	0	0	0	0	0
AT1G69620.1	336530000	11766000	396980000	16440000	223630000	4791400	0	307770000	342290000	0	145010000	4858400	26559000	124170000	124570000	0	171250000	22589000	161890000	671450000	588200000	101880000	10773000	91969000	625980000	574110000	0	21863000	0	0	144220000	556070000	159480000	79603000	3124400	36042000	537850000	89388000	105480000	214430000
AT1G69740	3426300	0	0	0	15719000	10755000	12587000	15879000	0	0	0	14106000	10438000	15137000	0	0	0	18243000	9053600	0	0	0	0	12267000	0	0	0	0	0	0	0	0	0	0	0	0	0	0	0	0
AT1G69830	0	0	0	0	18769000	0	11059000	0	0	0	0	9386200	14264000	9416800	0	0	0	7869300	0	0	0	0	0	4260200	0	0	0	0	0	0	0	0	0	0	0	0	0	0	0	0
AT1G69840	54754000	0	0	0	31759000	0	24814000	0	18020000	0	0	0	18120000	0	0	0	0	0	0	0	0	0	0	13558000	0	0	0	0	0	0	0	0	0	0	0	0	0	0	0	0
AT1G70190.2;AT1G70190.1	0	0	0	0	0	0	8088000	0	0	0	8536400	0	0	0	0	0	7755700	0	0	0	0	0	0	0	0	0	0	0	0	0	0	0	0	0	0	0	28409000	0	5818700	0
AT1G70410	13227000	0	0	0	44410000	17584000	0	16748000	0	0	0	20675000	0	0	0	0	0	19039000	0	0	0	0	0	18548000	9697000	0	15133000	0	0	0	0	0	0	0	0	0	0	0	0	15354000
AT1G70600.1	197410000	21511000	557910000	0	257940000	0	0	443140000	173340000	0	114070000	0	0	268490000	130050000	0	153170000	0	670550000	825260000	0	308710000	5315000	279510000	771140000	589440000	0	86478000	0	0	0	481880000	248700000	312850000	0	14568000	563130000	77061000	0	214330000
AT1G70730	13471000	0	11237000	0	10028000	9136800	16651000	11956000	13860000	0	0	9955400	17859000	16594000	13122000	0	0	13711000	8916800	0	0	0	0	8307800	8961000	0	7731400	0	0	0	0	0	0	9273700	0	13947000	8566300	11049000	9446500	11110000
AT1G70770	30938000	0	0	0	3692900	3746000	13224000	0	0	0	0	6106400	13816000	6175100	0	0	0	0	5926200	0	0	0	8093200	11891000	8632900	0	0	0	8469300	0	0	0	5303000	12559000	0	95000000	5601500	8062600	20262000	15204000
AT1G70850	12608000	0	0	0	0	0	0	0	0	0	0	0	0	0	0	0	0	0	35840000	0	12773000	0	0	40437000	16803000	0	17214000	0	0	0	0	0	12949000	0	0	24407000	22703000	13027000	22111000	20182000
AT1G70890	0	0	0	0	17318000	0	11912000	0	0	0	0	8516700	0	0	0	0	0	4413000	0	0	0	0	0	0	0	0	0	0	0	0	0	0	0	0	0	0	0	0	0	0
AT1G71220	8999800	0	0	0	5790200	0	7589500	0	0	0	0	7367100	15519000	8100800	0	0	0	0	7636000	0	0	0	0	7056200	7171500	0	0	0	0	0	0	0	2858800	4917100	0	31273000	2937100	10107000	6012200	9861800
AT1G71860	2574600	0	0	0	0	0	0	0	0	0	0	475210000	0	0	0	0	0	0	379640000	0	0	0	0	0	40869000	0	0	0	0	0	0	0	0	0	0	0	585080000	397470000	0	0
AT1G72150	4370300	0	0	0	6521100	0	0	0	0	0	0	0	0	0	0	0	0	0	5582500	0	0	0	0	4899400	0	0	0	0	0	0	0	0	0	0	0	16585000	10150000	0	0	6614600
AT1G72370.2;AT1G72370.1	593920000	1720400000	575740000	1311000000	2423900000	2586200000	1527100000	947090000	577910000	1499800000	1145100000	2025500000	600240000	293180000	437170000	0	2249300000	9738900000	719470000	1687200000	50338000	3765900000	6210700000	2951200000	1797200000	2375200000	0	1125300000	829030000	817590000	548470000	1791500000	4940900000	2714200000	1761400000	583020000	311410000	297770000	1228400000	2620100000
AT1G72610	0	0	0	0	36803000	40306000	46113000	0	0	0	0	42029000	32342000	0	0	0	0	19225000	0	0	0	0	0	0	0	0	0	0	0	0	0	0	0	0	0	0	0	0	0	0
AT1G72680	8175000	0	0	0	0	0	0	0	0	0	0	0	0	0	0	0	0	0	0	0	0	0	0	0	0	0	0	0	0	0	0	0	0	0	0	4915400	0	4593400	0	0
AT1G72750	3360600	0	0	0	0	0	0	0	0	0	0	0	4067500	0	0	0	0	0	0	0	0	0	0	0	0	0	0	0	0	0	0	0	0	0	0	9888400	0	0	0	0
AT1G73230	5187500	0	0	0	0	0	0	0	0	0	0	0	0	0	0	0	0	0	0	0	0	0	0	0	0	0	0	0	0	0	0	0	0	0	0	3178700	0	4650900	0	0
AT1G73260	119060000	0	0	0	12154000	0	34114000	21999000	0	0	0	10398000	30491000	25207000	0	15873000	0	18104000	66797000	0	32093000	0	50874000	48613000	23732000	21963000	38473000	0	29584000	0	0	0	35179000	28858000	0	121170000	98465000	78015000	95990000	66108000
AT1G73650	4668700	0	0	0	0	0	8153100	0	0	0	0	0	0	0	0	0	0	0	0	0	0	0	0	7873500	0	0	0	0	0	0	0	0	0	8551300	0	14162000	0	0	0	0
AT1G73940	67929000	0	28463000	28642000	0	12529000	0	24914000	0	0	0	24032000	0	40368000	0	0	0	35070000	6387800	13977000	0	0	0	5159200	81454000	23026000	20673000	0	0	0	0	0	20399000	0	0	0	24990000	98833000	8647400	14175000
AT1G73990	0	0	0	0	5065300	0	5936100	0	0	0	0	0	4539900	0	0	0	0	0	0	0	0	0	0	0	0	0	0	0	0	0	0	0	0	0	0	3542300	0	0	0	0
AT1G74020	26822000	0	0	0	0	0	0	0	0	0	0	0	0	0	0	0	0	0	0	0	0	0	0	0	0	0	0	0	0	0	0	0	0	0	0	7712900	0	0	0	10707000
AT1G74030	108240000	0	0	0	6373900	0	0	0	0	0	0	0	8399100	0	0	0	0	13434000	30311000	0	0	0	30351000	34892000	23660000	17493000	20849000	0	0	44629000	0	0	20369000	19742000	23073000	28383000	32100000	28874000	30799000	42088000
AT1G74060.1;AT1G74050.1	2037600000	69035000	2101000000	5191800	947200000	5193700	65362000	2127200000	1142200000	626490000	602430000	0	256660000	1271000000	618080000	0	704550000	48982000	2872700000	2621400000	0	983890000	5242400	1263500000	3140300000	3034300000	0	297260000	0	257000000	1990100000	1616600000	931030000	556820000	10027000	127170000	3404100000	776130000	469930000	846700000
AT1G74100	7237300	0	0	0	5895200	0	0	0	0	0	0	0	0	0	0	0	0	0	6297300	0	0	0	0	6600600	0	0	0	0	0	0	0	0	0	0	0	0	0	0	0	5551200
AT1G74260	11773000	0	0	0	6199600	0	7072300	0	0	0	0	6796200	6562400	8753300	0	0	0	5427200	3569000	0	0	0	0	4103500	0	0	0	0	0	0	0	0	0	0	0	16218000	6656500	7072800	6653800	8970800
AT1G74470	0	0	0	0	11348000	0	14227000	0	0	0	0	9652900	0	12891000	0	0	0	4965600	0	0	0	0	0	0	0	0	0	0	0	0	0	0	0	0	0	0	0	0	0	0
AT1G74560	6419900	0	0	0	7789700	0	0	0	0	0	0	0	0	0	0	0	0	0	0	0	0	0	0	0	0	0	0	0	0	0	0	0	0	0	0	0	12033000	10560000	0	0
AT1G74920	26072000	6944900	19719000	0	31344000	19770000	25647000	33967000	10518000	0	0	20205000	24079000	0	0	15424000	0	23143000	19410000	0	0	0	0	30356000	16360000	15118000	22056000	0	13510000	0	0	0	14979000	8977400	0	11746000	13797000	13082000	16791000	24796000
AT1G74970.1	139440000	413270000	118260000	1273000000	280330000	604900000	182930000	36052000	57928000	0	170260000	585000000	183340000	59214000	83177000	0	221750000	128130000	0	0	0	0	77205000	6442100	0	7351600	0	13057000	0	0	0	0	13170000	0	10492000	6986800	4003800	0	4991400	4397000
AT1G75040	0	0	0	0	0	0	62772000	50616000	0	56981000	44315000	52481000	8719900	9885700	0	0	0	0	0	0	0	0	0	0	0	0	0	0	0	0	0	0	0	0	0	0	0	0	0	0
AT1G75220	6293000	0	0	0	0	0	0	0	0	0	0	0	0	0	0	0	0	0	11133000	0	0	0	0	0	0	0	0	0	0	0	0	0	0	0	0	5673000	0	0	0	0
AT1G75270	0	0	14270000	0	8137000	3911600	7684800	0	0	0	0	0	0	0	0	0	0	0	10979000	0	0	0	0	16436000	9249100	0	0	0	0	0	0	0	0	0	0	7643000	10273000	6983100	0	0
AT1G75280	0	0	0	0	34502000	17169000	20016000	0	0	0	0	17721000	14069000	0	0	0	0	12131000	17594000	0	0	0	0	16755000	20267000	0	0	0	0	0	0	0	0	0	0	0	0	0	0	0
AT1G75330	5867000	0	0	0	13611000	9833500	0	0	0	0	0	0	7823900	11678000	0	0	0	11553000	9790200	0	0	0	10477000	9395100	6691400	0	0	0	0	0	0	0	0	0	8774700	6908600	0	7364400	0	7943000
AT1G75350.1	61294000	496480000	86221000	6850800	175440000	13238000	184650000	46770000	0	0	85268000	8282100	78590000	0	50531000	0	131120000	0	0	0	0	0	0	0	0	28050000	0	0	0	0	0	0	0	0	0	0	0	0	0	0
AT1G75950	0	0	0	0	0	0	0	0	0	0	0	4346300	0	0	0	0	0	0	3372700	0	0	0	0	10320000	5137400	0	0	0	0	0	0	0	0	0	0	0	0	0	0	0
AT1G75990	5855800	0	0	0	7616200	0	7841800	0	0	0	0	0	9600300	0	0	0	0	0	0	0	0	0	0	0	0	0	0	0	0	0	0	0	0	0	0	18578000	0	5573400	0	0
AT1G76010	2996300	0	0	0	0	0	0	0	0	0	0	0	0	0	0	0	0	0	8223800	0	10998000	0	19412000	0	6683900	16161000	17384000	0	32779000	0	0	0	10113000	0	16668000	14013000	0	0	0	0
AT1G76140	6869000	0	0	0	3460200	3621500	0	0	0	0	0	2843500	0	0	0	4000200	0	6448700	5390200	0	0	0	0	7712400	3804100	0	0	0	0	0	0	0	0	4778100	0	10043000	3655000	0	4116300	0
AT1G76180	14778000	0	0	0	21155000	20799000	23086000	0	0	0	31372000	23284000	0	0	0	0	0	14258000	37579000	0	0	0	0	32306000	41416000	0	20377000	0	0	0	0	0	0	0	0	10984000	33265000	27765000	0	11484000
AT1G76680	3844600	0	0	0	13677000	8949200	9236100	0	0	0	0	9159200	6754600	0	0	0	0	6965600	0	0	0	0	0	9955000	9747600	0	0	0	0	0	0	0	0	0	0	0	0	7608100	0	0
AT1G76790	10524000	0	0	0	0	0	0	0	0	0	0	0	0	0	0	0	0	0	7408400	0	0	0	0	0	7200100	0	0	0	0	0	0	0	0	0	0	11024000	0	5435100	0	0
AT1G77120	1889300000	20450000	70219000	21870000	98769000	52151000	90415000	67886000	29340000	33466000	0	107740000	289080000	220970000	128370000	158990000	0	273730000	1087800000	103670000	333510000	0	526300000	887380000	715850000	418740000	659030000	0	603790000	0	91180000	183870000	597150000	843970000	576170000	934600000	1187100000	1390500000	724800000	1012500000
AT1G77510	27414000	0	9741000	0	9363600	5878800	15646000	17737000	13684000	0	0	9759500	10657000	15393000	0	15369000	0	12604000	18554000	0	0	0	18407000	16567000	9767600	13187000	11055000	0	0	0	0	0	13133000	9554900	0	11969000	14428000	9820900	19836000	22780000
AT1G77750.1	0	0	0	0	11070000	0	0	0	0	0	0	0	0	0	0	0	0	14775000	0	0	0	0	8408000	11091000	0	0	0	0	0	0	0	0	0	0	0	0	0	0	0	16815000
AT1G77760	5554700	0	0	0	0	0	0	0	0	0	0	0	0	0	0	0	0	0	0	0	0	0	0	0	0	0	0	0	0	0	0	0	0	0	0	27374000	0	0	0	4991900
AT1G77940.1	268910000	0	197360000	0	151460000	0	0	358380000	220380000	0	61560000	0	53133000	281220000	162600000	0	142120000	22522000	427430000	519210000	0	364420000	0	200030000	664350000	264990000	0	0	0	0	287670000	649680000	467380000	203060000	0	0	573300000	230880000	150390000	235430000
AT1G78300	34501000	0	0	0	12916000	0	22481000	0	0	0	0	18676000	12294000	0	0	0	0	11235000	29586000	0	0	0	0	20791000	29389000	0	17900000	0	0	0	25459000	0	0	0	0	15774000	0	24659000	0	13457000
AT1G78370	12502000	0	21101000	17858000	63600000	53030000	24292000	19224000	15360000	0	0	64368000	42101000	39167000	18384000	22579000	0	36424000	6546300	0	0	0	0	11077000	27423000	0	8909100	0	0	0	0	0	0	0	0	6837800	14336000	11109000	0	9285200
AT1G78380	190560000	59539000	91830000	51675000	95515000	60733000	82024000	99884000	62027000	56839000	73508000	91489000	103370000	101250000	40723000	65738000	0	41482000	165910000	0	51311000	0	94818000	102590000	140350000	66245000	106330000	0	60155000	0	0	68992000	84093000	59902000	57529000	102030000	118690000	151470000	94143000	94268000
AT1G78570	32394000	0	0	0	0	0	26203000	0	0	0	0	0	17403000	0	0	0	0	0	0	0	0	0	0	22096000	0	0	0	0	0	0	0	0	3461600	0	0	90460000	7909300	0	14975000	22922000
AT1G78630.1	234140000	3009600000	1425500000	26333000	385670000	36990000	780830000	330210000	89146000	48020000	196250000	54957000	1363000000	139160000	199010000	0	241150000	21073000	0	0	0	0	2801300	233120000	9584700	10753000	0	0	0	26430000	0	0	5578600	0	0	132380000	66619000	0	0	0
AT1G78830	6219200	19120000	72640000	25240000	90049000	56030000	60105000	28703000	22516000	22700000	0	82134000	26699000	21373000	0	0	0	32563000	7210400	0	0	0	0	8224000	4425100	0	0	0	0	0	0	0	0	6788400	0	3367000	0	7826800	0	0
AT1G78850	386860000	39875000	67810000	57867000	74902000	48555000	88208000	100750000	91687000	60534000	124480000	101520000	45370000	66300000	39561000	53562000	0	48309000	335090000	52953000	122960000	0	239660000	170430000	168610000	87664000	179460000	0	193150000	422260000	285410000	74186000	192160000	239550000	208120000	135990000	319020000	373680000	175830000	330640000
AT1G78900	363620000	107970000	502080000	256810000	3616000000	202220000	1970400000	684470000	303330000	80081000	213410000	377630000	2446400000	968490000	487040000	523710000	0	595890000	1186200000	77723000	262120000	0	337800000	1562300000	464660000	256140000	298600000	0	309060000	982400000	145260000	94838000	398930000	570990000	347480000	1197600000	896860000	781580000	444620000	423020000
AT1G79230.2;AT1G79230.3;AT1G79230.1	0	0	0	4972100	0	0	0	0	0	0	0	0	0	0	0	0	0	4334600	0	0	0	0	4716600	0	3487700	0	0	0	0	0	0	0	0	0	0	0	0	0	0	0
AT1G79340	25885000	0	0	0	8871700	0	10248000	0	0	0	0	0	0	0	0	0	0	6120100	13084000	0	0	0	0	9024900	0	0	0	0	0	0	0	0	0	0	0	11057000	9338700	7427800	0	7859500
AT1G79440	12884000	18184000	11198000	20825000	19922000	11217000	21531000	26059000	16731000	0	0	22223000	15190000	17046000	0	0	0	17873000	15065000	0	0	0	16688000	13859000	10041000	8099700	0	0	0	0	0	0	0	13854000	0	9530800	13512000	14495000	12891000	7449800
AT1G79530	46756000	0	0	0	0	0	0	0	0	0	0	0	0	0	0	0	0	0	13208000	0	0	0	0	17622000	13432000	13752000	0	0	27030000	0	0	0	10602000	20482000	0	53546000	14554000	16543000	20660000	30044000
AT1G79550.2;AT1G79550.1	51468000	126810000	49184000	158950000	92761000	158180000	132330000	133830000	46418000	29915000	123340000	131170000	139940000	111620000	130550000	0	132470000	253330000	42611000	89570000	0	201890000	300090000	228520000	145220000	148760000	0	263620000	284710000	104140000	0	160800000	123780000	155880000	270590000	301130000	331090000	268300000	289380000	266160000
AT1G79560	0	0	0	0	9826100	0	17106000	0	0	0	0	0	14716000	0	0	0	0	0	0	0	0	0	0	0	0	0	0	0	0	0	0	0	0	0	0	0	0	0	0	0
AT1G79690	16575000	0	0	0	8735700	0	8224600	0	0	0	0	0	0	9765100	7058100	0	0	0	13796000	0	8156600	0	10714000	13541000	0	6890800	19119000	0	14245000	0	0	0	0	9217300	0	6311300	0	17488000	0	9927600
AT1G79750	4620800	0	0	0	0	0	0	0	0	0	0	0	0	0	0	0	0	6300500	0	0	0	0	0	0	0	0	0	0	0	0	0	0	0	0	0	5594700	0	0	6730900	0
AT1G79850.1	165330000	237770000	97307000	698980000	278190000	915880000	316500000	64419000	142750000	102140000	313300000	632470000	285330000	92289000	295220000	0	185470000	80973000	0	0	0	0	80953000	13827000	3869800	15674000	0	19819000	116090000	0	0	12695000	10503000	0	18246000	0	0	0	2492800	11774000
AT1G79870	42459000	0	4101900	0	5336400	6629500	0	6679000	0	0	0	0	0	0	0	0	0	14285000	0	0	0	0	0	8811400	0	0	0	0	0	0	0	0	0	0	0	0	0	0	4051800	0
AT1G79940	15790000	0	0	0	0	0	0	0	0	0	0	0	0	0	0	0	0	0	0	0	0	0	0	0	0	0	0	0	0	0	0	0	0	0	0	15447000	0	0	0	3526100
AT1G80070	20802000	0	0	0	95758000	191500000	246250000	0	0	0	0	391170000	370940000	0	0	0	0	337050000	0	0	0	0	444880000	136900000	0	0	0	0	0	0	0	0	209340000	302130000	0	469170000	0	0	0	217790000
AT1G80360	12338000	0	0	0	0	0	0	0	0	0	0	0	0	0	0	0	0	0	4183500	0	0	0	0	0	4591400	0	0	0	0	0	0	0	0	0	0	15107000	0	0	0	7814000
AT1G80410	16899000	0	0	0	1712400	0	7386700	0	0	0	0	2167500	3394500	0	0	0	0	3093300	2172800	0	0	0	0	6999900	0	0	0	0	0	0	0	0	0	2938000	0	180260000	3004200	4983500	3010000	20292000
AT1G80460	4468400	0	0	0	0	0	0	0	0	0	0	0	0	0	0	0	0	0	8002100	0	0	0	0	0	0	0	0	0	0	0	0	0	0	8858600	0	23224000	0	0	6678200	0
AT1G80600	5730000	0	8911000	0	12209000	0	13450000	0	0	0	0	0	11617000	17435000	0	0	0	18450000	9626400	0	0	0	9935800	0	0	6173100	0	0	0	0	0	0	0	0	0	8695200	0	0	9909500	0
AT1G80750.1	0	0	0	0	0	0	0	27766000	0	0	10504000	0	0	25226000	53527000	0	12446000	0	0	0	0	0	0	7483200	67531000	15218000	0	0	0	0	0	22761000	4922200	0	12637000	0	23435000	25337000	18812000	0
AT1G80930	9168700	0	0	0	0	3146300	0	0	0	0	0	0	0	0	0	0	0	10878000	0	0	0	0	0	0	0	0	0	0	0	0	0	0	0	0	0	0	0	0	0	0
AT2G01140	287050000	0	39681000	0	42189000	30066000	42849000	55831000	37893000	0	0	32095000	46882000	46827000	24943000	60546000	0	54953000	74525000	12234000	28084000	0	83528000	60658000	44202000	58376000	53337000	0	116400000	71148000	0	0	61087000	84071000	73302000	74472000	101210000	52283000	110820000	109550000
AT2G01250.1;AT2G01250.2	2164300000	183510000	2441800000	42590000	1204300000	67044000	177610000	2711800000	2314200000	1197400000	724980000	50149000	499390000	1759600000	1301600000	0	1589400000	171990000	4205600000	3329800000	0	1542100000	64898000	1634700000	5740600000	4548700000	0	509140000	0	307200000	5230500000	2758000000	2713100000	1507900000	66897000	262000000	4054500000	1510500000	1379600000	1297400000
AT2G01350	3228900	0	0	0	0	0	0	0	0	0	0	0	0	0	0	0	0	1576500	0	0	0	0	0	4855400	2288600	0	0	0	0	0	0	0	0	0	0	24056000	3853200	0	0	8665700
AT2G01520	31339000	0	0	0	13281000	0	0	0	0	0	0	0	0	0	0	0	0	0	276210000	30856000	41787000	61308000	85054000	131510000	155860000	0	63540000	0	47755000	0	0	0	0	0	0	44213000	36918000	48347000	33262000	20102000
AT2G01530	0	0	0	0	0	0	0	0	0	0	0	0	0	0	0	0	0	0	10622000	0	0	0	0	11680000	6942200	0	0	0	0	0	0	0	0	5125900	0	5265900	0	0	0	4081700
AT2G01720	9503200	0	0	0	4985400	0	4669700	0	0	0	0	0	8059700	0	0	0	0	0	5153900	0	0	0	0	5873000	0	0	0	0	0	0	0	0	0	0	0	34013000	0	5254600	0	8269200
AT2G01970	14479000	0	0	0	0	0	0	0	0	0	0	0	0	0	0	0	0	0	0	0	0	0	0	5887800	0	0	0	0	0	0	0	0	0	0	0	22685000	0	0	0	0
AT2G02050	3742400	0	0	0	31315000	0	5598800	0	0	0	0	0	0	7095700	0	0	0	0	5915500	0	0	0	0	6383700	0	0	4549000	0	0	0	0	0	0	0	0	0	0	0	0	2207900
AT2G02390	34542000	0	0	0	6524000	3528600	9501500	0	0	0	0	4710000	9565000	0	0	0	0	12548000	27783000	0	10923000	0	0	22710000	10326000	0	0	0	0	0	0	0	13247000	0	0	18882000	29999000	17774000	33258000	35089000
AT2G02560	4016100	0	0	0	1204400	0	0	0	0	0	0	936870	1610900	0	0	0	0	0	0	0	0	0	0	0	0	0	0	0	0	0	0	0	0	0	0	56035000	0	1022300	0	0
AT2G03510	50187000	0	0	0	47911000	0	141100000	23570000	0	0	0	0	179820000	38370000	0	0	0	7183500	35261000	0	0	0	0	77280000	4662500	0	0	0	0	0	0	0	0	12675000	0	152460000	14619000	23731000	31925000	62457000
AT2G03820.1	15123000	0	54829000	1805100	0	0	0	65185000	0	0	0	9699600	43497000	310300000	58701000	0	5689700	9292400	37906000	14247000	0	0	6078300	43754000	347710000	34163000	0	0	0	0	192320000	57803000	3529100	0	32680000	6295300	251120000	46478000	14143000	5500600
AT2G04030	6219500	0	10332000	0	23510000	13690000	11956000	0	0	0	0	9797200	21251000	23754000	0	0	0	16197000	7043200	0	0	0	0	7994900	8996900	0	0	0	0	0	0	0	0	0	0	11780000	0	8085500	0	10303000
AT2G04390.1	0	0	0	0	0	0	0	0	0	0	0	0	0	0	0	0	11165000	0	0	0	0	0	76995000	0	0	0	0	0	0	0	0	0	0	0	0	0	0	0	0	22774000
AT2G04400	0	0	0	0	0	0	0	0	0	0	0	0	4647100	0	0	0	0	6218500	0	0	0	0	0	0	0	0	0	0	0	0	0	0	0	0	0	0	0	3736500	0	0
AT2G05100	0	0	0	0	177090000	89425000	50100000	29823000	0	0	0	39382000	87222000	47701000	0	0	0	106410000	0	0	0	0	0	0	0	0	0	0	0	0	0	0	0	0	0	0	0	0	0	0
AT2G05220.2;AT2G05220.1	0	0	0	4339500	126640000	23261000	0	0	0	0	5347500	0	0	0	0	0	161280000	134370000	36007000	80922000	0	38450000	262570000	33841000	0	96476000	0	0	0	0	0	0	4814600	65773000	0	0	0	0	3457900	127130000
AT2G05710	148900000	0	21502000	0	30761000	17606000	21226000	40123000	14435000	0	0	22109000	34198000	40925000	19828000	38151000	0	44178000	51012000	0	15716000	0	54799000	73097000	22554000	39376000	33121000	0	51853000	0	0	0	31648000	42947000	33857000	60702000	25601000	35621000	33176000	63441000
AT2G05840	39250000	0	0	0	30503000	0	15882000	14033000	0	0	0	18792000	16225000	0	0	0	0	0	48523000	0	0	0	0	15011000	0	0	0	0	0	0	0	0	0	0	0	15003000	18765000	23883000	0	11691000
AT2G05920	0	0	0	0	6325900	0	0	0	0	0	0	0	0	0	0	0	0	0	7695000	0	0	0	0	0	0	0	0	0	0	0	0	0	0	0	0	7781500	0	6995500	0	0
AT2G05990	13721000	0	18755000	0	27175000	15284000	20018000	0	0	0	0	18480000	19269000	16867000	0	22839000	0	17089000	25343000	0	0	0	19509000	21396000	10310000	15701000	13017000	0	0	0	0	0	19393000	21281000	0	14486000	16752000	0	20584000	17774000
AT2G06850	0	0	0	0	6356100	0	13392000	0	0	0	0	0	9045800	0	0	0	0	5959700	0	0	0	0	0	3814100	0	0	0	0	0	0	0	0	0	0	0	10672000	0	0	0	4662200
AT2G07360	1155900	0	0	0	0	0	5714800	0	0	0	0	0	0	0	0	0	0	0	0	0	0	0	0	4953700	0	0	0	0	0	0	0	0	0	0	0	6336600	0	0	0	0
AT2G13360	0	19797000	57907000	11392000	96184000	53484000	111140000	77271000	91561000	17544000	40264000	162130000	93784000	37628000	22571000	20247000	0	116350000	2914400	0	0	0	0	6228300	0	33973000	0	0	0	0	0	0	0	3615200	0	4548800	3936100	4396300	0	13708000
AT2G14170	7579700	0	0	0	0	0	5439500	0	0	0	0	0	0	0	0	0	0	0	0	0	0	0	0	6869500	0	0	0	0	0	0	0	0	0	0	0	0	0	11810000	0	7929400
AT2G14740	0	0	0	0	4802300	0	5260400	0	0	0	0	0	0	0	0	0	0	0	0	0	0	0	0	0	0	0	0	0	0	0	0	0	0	0	0	4208700	0	0	0	0
AT2G15620	71669000	0	14625000	0	19583000	13111000	12633000	12944000	7122700	0	0	15912000	27956000	31290000	0	0	0	18970000	21527000	0	11079000	0	22063000	15040000	31441000	18235000	17140000	0	28720000	0	0	0	10175000	12726000	15259000	19924000	21349000	23368000	16906000	15251000
AT2G16060	101320000	0	0	0	13214000	0	8374300	0	0	0	0	10981000	20833000	19065000	0	15119000	0	15699000	74441000	0	0	0	19325000	72045000	51393000	31621000	46844000	0	30669000	49016000	0	0	30820000	30753000	17798000	92363000	44983000	50105000	45414000	60081000
AT2G16600	52576000	0	25566000	21472000	39624000	33764000	53171000	44490000	42445000	0	0	76475000	61641000	45453000	0	0	0	22653000	74379000	0	0	0	43635000	91496000	72318000	26158000	26327000	0	47348000	0	0	0	43643000	50028000	0	80969000	79190000	60819000	41271000	36333000
AT2G16950	14490000	0	0	0	3623400	0	5122500	0	0	0	0	0	5154800	0	0	0	0	0	4655900	0	0	0	0	3790900	4629400	0	0	0	0	0	0	0	0	0	0	30052000	0	2301200	0	7351000
AT2G17420.1;AT4G35460.1	0	12620000	7238300	18838000	15494000	22629000	21358000	0	0	0	36248000	20456000	21947000	0	15165000	0	18225000	67832000	0	0	0	45713000	44678000	52798000	19940000	37008000	0	36556000	0	0	0	34893000	32715000	0	81147000	62234000	63457000	44857000	45048000	48888000
AT2G17630	5761100	0	0	0	0	0	0	0	0	0	0	0	0	0	0	0	0	0	0	0	0	0	0	0	3322400	0	0	0	0	0	0	0	0	0	0	0	0	2681700	0	0
AT2G17720	2209100	0	0	0	0	0	0	0	0	0	0	2614900	0	0	0	0	0	0	3647600	0	0	0	0	3369800	0	0	0	0	0	0	0	0	0	0	0	9695600	0	4709900	0	4081100
AT2G18020.1;AT3G51190.1	1917000000	0	1956000000	17155000	918020000	23748000	90879000	1139800000	1889400000	914310000	733100000	10583000	218990000	395970000	335520000	0	863210000	112240000	2356200000	2444700000	0	948870000	25789000	1780200000	1604500000	1557400000	0	293950000	0	88231000	1725400000	1201500000	1854700000	548930000	11676000	108880000	3158100000	615120000	713760000	976550000
AT2G18110.1	0	0	0	0	4680200	0	0	0	0	0	7994600	6102600	0	0	0	0	0	0	0	0	0	0	0	9129600	0	0	0	0	0	0	0	0	0	0	21900000	22358000	9603900	8663900	0	9319500
AT2G18150	2692000	0	0	0	0	0	0	0	0	0	0	0	0	0	0	0	0	0	0	0	0	0	0	0	0	0	0	0	0	0	0	0	0	0	0	12914000	0	0	0	8767800
AT2G18740	25913000	0	0	0	17139000	13330000	16225000	0	0	0	0	11293000	14826000	0	0	0	0	21449000	13964000	0	0	0	22918000	21337000	8232300	0	10209000	0	0	0	0	0	13244000	25108000	0	19345000	15029000	6906400	13499000	15315000
AT2G18900	0	0	0	0	0	0	0	0	0	0	0	0	3742800	0	0	7801500	0	6569900	0	0	0	0	0	0	0	0	0	0	0	0	0	0	0	3459000	0	0	0	0	0	0
AT2G18960	7328200	0	0	0	19280000	0	13816000	0	0	0	0	0	42217000	8996700	0	0	0	9135800	0	0	0	0	0	18087000	9395000	0	0	0	0	0	0	0	0	0	0	29767000	0	0	0	10735000
AT2G19480	15614000	0	0	0	13932000	0	12298000	0	0	0	0	19998000	0	0	0	0	0	13125000	0	0	0	0	0	7684900	0	0	7352400	0	0	0	0	0	0	0	0	0	12126000	15633000	0	10657000
AT2G19590	9040500	0	0	0	0	0	0	0	0	0	0	0	0	0	0	0	0	0	0	0	0	0	0	5022600	5021700	9521400	8546400	0	0	0	0	0	0	8799800	0	0	6796300	4243200	0	10950000
AT2G19730.3;AT2G19730.2;AT2G19730.1	1246600000	40067000	991790000	0	730290000	10837000	36906000	883260000	935940000	841110000	688780000	10686000	190850000	1039300000	443410000	0	764970000	60001000	1888700000	1963200000	0	928900000	3143000	834110000	1546100000	2584300000	0	284780000	0	322030000	2082300000	1003600000	1646100000	683760000	0	0	1297100000	191620000	412990000	660970000
AT2G19760	9832000	0	0	0	7804400	5494700	0	0	0	0	0	0	0	0	0	0	0	4833800	16480000	0	0	0	0	26572000	7771700	0	11005000	0	0	0	0	0	0	8488500	0	9078300	0	12208000	0	16369000
AT2G19940	14642000	0	11218000	0	14682000	10036000	19350000	0	0	0	0	20609000	16672000	7524800	0	10516000	0	11678000	8181600	0	0	0	0	7332900	5444400	0	0	0	0	0	0	0	8461000	0	0	7189900	8970900	7340400	9140900	9458900
AT2G20060.1	17247000	60125000	52735000	0	23647000	0	78386000	48434000	0	0	0	0	138620000	37115000	36319000	0	37985000	19846000	34464000	25259000	0	49073000	0	205800000	50046000	35534000	0	81340000	0	0	50607000	34996000	55895000	67602000	14227000	132550000	146100000	36334000	65615000	33972000
AT2G20360	12314000	0	0	0	0	0	0	0	0	0	0	0	0	7063900	0	0	0	0	6013600	0	0	0	0	0	0	0	0	0	0	0	0	0	0	0	0	0	0	0	0	8084000
AT2G20420	80807000	16124000	30244000	16182000	30930000	22188000	41495000	50162000	0	0	49817000	36321000	30585000	40877000	0	32671000	0	32331000	52175000	0	18448000	0	43764000	36545000	41474000	26701000	28423000	0	43897000	0	0	27461000	22106000	28900000	0	45581000	38170000	64980000	30294000	40734000
AT2G20450.1	286220000	20839000	187330000	0	138760000	0	0	219470000	167870000	145780000	85823000	0	43294000	225210000	81475000	0	110160000	10977000	402510000	304080000	0	192440000	0	273790000	380550000	351740000	0	61399000	0	0	362170000	220460000	281770000	137530000	4197600	0	536780000	83204000	86051000	135450000
AT2G20530	138990000	0	10930000	0	89393000	0	170810000	44663000	36104000	0	0	0	223890000	74906000	0	18381000	0	23326000	23063000	0	0	0	0	129640000	17546000	11520000	10551000	0	0	74167000	0	0	12726000	27197000	0	93736000	25573000	7513800	59425000	65584000
AT2G20580	31944000	0	0	0	44499000	0	94009000	0	0	0	0	11372000	124160000	17183000	0	0	0	8476700	8255800	0	0	0	0	81232000	6369400	0	9086600	0	19205000	0	0	0	0	6844700	0	276540000	54993000	36214000	43377000	56854000
AT2G20610	23204000	0	7234700	0	10923000	6734300	10025000	0	10658000	0	0	0	13530000	11934000	0	0	0	14558000	6496900	0	0	0	0	13140000	0	0	0	0	0	0	0	0	4814100	0	0	8241900	0	9376000	6024000	8771400
AT2G20630	1522800	0	0	0	0	0	0	0	0	0	0	0	0	0	0	0	0	0	0	0	0	0	0	0	2640400	0	0	0	0	0	0	0	0	0	0	8298700	0	2254400	0	0
AT2G20760	47377000	0	0	0	22709000	0	19726000	0	0	0	0	38537000	0	0	0	0	0	20383000	0	0	0	0	0	13802000	0	0	32290000	0	0	0	0	0	0	36630000	0	19665000	16229000	16399000	0	38551000
AT2G21160	5581700	0	0	0	4899200	0	0	0	0	0	0	4728800	0	0	0	0	0	0	7469500	0	0	0	0	0	0	0	0	0	0	0	0	0	0	0	0	10184000	0	0	9177600	20073000
AT2G21170	27679000	27882000	36619000	31062000	62178000	38618000	51376000	43773000	25426000	34469000	49704000	40527000	32641000	42373000	31037000	26794000	0	28201000	16684000	0	0	0	25963000	19709000	19683000	15541000	19074000	0	29057000	0	0	0	9796900	9204500	0	18418000	16182000	29705000	15279000	21834000
AT2G21250	13936000	0	7329900	0	17936000	10367000	14363000	0	8948300	0	0	11735000	24224000	13242000	8970700	14256000	0	16129000	12719000	0	0	0	0	0	9763200	6091800	0	0	0	0	0	0	0	10470000	0	15680000	9727100	9134700	7458700	10570000
AT2G21330	0	119170000	183430000	116760000	215860000	164540000	81153000	86243000	68392000	65478000	65800000	120200000	58684000	69693000	96478000	42421000	0	129510000	0	0	0	0	0	0	0	0	0	0	0	0	0	0	0	0	0	0	0	0	0	0
AT2G21390	120330000	0	0	0	37880000	4547300	50126000	0	0	0	0	13910000	86210000	17844000	0	0	0	18700000	14794000	0	0	0	0	70026000	6241400	9572800	8477000	0	0	0	0	0	18186000	13474000	0	244260000	30145000	46035000	82801000	73314000
AT2G21410	0	0	0	0	71725000	0	21750000	0	0	0	0	0	13898000	0	0	0	0	7374900	17270000	0	0	0	0	25556000	0	0	0	0	0	0	0	0	0	9027200	0	0	0	0	0	0
AT2G21580.2;AT2G21580.1	0	0	0	0	137130000	104950000	0	0	0	0	111300000	68090000	0	0	0	0	129460000	775050000	0	0	0	184490000	313710000	106460000	0	0	0	94246000	0	0	0	0	184300000	150260000	41370000	0	0	0	83660000	0
AT2G21620	23045000	0	0	0	0	0	0	0	0	0	0	10407000	0	0	0	0	0	0	10918000	0	0	0	0	9159800	6285600	0	0	0	0	0	0	0	0	0	0	6901500	7209500	6683100	0	9623900
AT2G21660	21560000	0	0	0	0	0	57296000	34403000	0	0	0	36206000	32315000	41153000	24729000	24322000	0	22521000	0	0	0	0	0	17751000	0	0	0	0	0	0	0	0	20609000	0	0	69145000	62975000	0	0	55450000
AT2G21870	48957000	0	42544000	0	350440000	11026000	202580000	71402000	0	0	0	35471000	256790000	74711000	0	0	0	25739000	85456000	0	9372400	0	12842000	372320000	107910000	20281000	41460000	0	19120000	0	0	0	27746000	0	0	113270000	171670000	135640000	80598000	66502000
AT2G22125	0	0	0	0	4078700	0	0	0	0	0	0	0	3978200	0	0	0	0	0	0	0	0	0	0	0	0	0	0	0	0	0	0	0	0	0	0	5999400	0	0	0	0
AT2G22170	73853000	0	0	0	15278000	0	0	0	0	0	0	15854000	11414000	0	0	0	0	16189000	34026000	0	0	0	13710000	26740000	26443000	0	21321000	0	0	0	0	0	0	16617000	0	33830000	28434000	22806000	20774000	31617000
AT2G22230	7121900	0	0	0	3494400	0	0	0	0	0	0	0	6410500	0	0	0	0	0	0	0	0	0	0	7243200	0	0	0	0	0	0	0	0	0	0	0	5660500	0	0	0	3528800
AT2G22250	3192200	0	0	0	0	0	0	0	0	0	0	0	0	0	0	0	0	0	0	0	0	0	0	0	0	0	0	0	0	0	0	0	0	0	0	14571000	0	0	0	7121400
AT2G22480	3965500	0	0	0	0	0	0	0	0	0	0	0	0	0	0	0	0	0	0	0	0	0	0	5341600	0	0	0	0	0	0	0	0	0	0	0	6306400	0	0	0	0
AT2G22780.1	0	7057800	0	5440300	6602300	12191000	0	0	0	0	10623000	18758000	0	0	0	0	21873000	14880000	0	0	0	16462000	14591000	10758000	8133600	9111600	0	0	0	0	0	7630300	12837000	0	17524000	7051200	12129000	11318000	31393000	13158000
AT2G23350	13889000	0	0	0	5010200	6268700	8354400	0	0	0	0	5963000	9336500	0	0	0	0	5543800	4367300	0	0	0	0	7949900	5920200	0	0	0	0	0	0	0	0	0	0	33674000	10574000	16306000	13983000	11730000
AT2G23610	1703500	0	0	0	4374500	0	0	0	0	0	0	0	0	0	0	0	0	0	0	0	0	0	7837200	5089400	4118800	0	0	0	0	0	0	0	0	0	0	0	0	3239100	0	0
AT2G24090.1	141020000	690390000	0	0	0	0	710940000	0	0	0	0	0	679190000	138830000	0	0	0	0	0	0	0	0	0	52617000	0	0	0	0	0	0	0	0	0	0	0	0	0	0	0	0
AT2G24180	13828000	0	0	0	2062000	0	2035500	0	0	0	0	0	1951000	0	0	0	0	0	0	0	0	0	0	3973500	0	0	0	0	0	0	0	0	0	1366700	0	74890000	0	0	4391800	8155100
AT2G24200	376910000	74929000	176090000	118020000	198210000	93358000	208240000	200300000	201770000	135740000	134180000	203480000	164970000	215350000	149020000	232330000	0	184200000	288750000	16257000	107070000	0	153040000	259290000	146870000	127610000	152680000	0	230550000	114250000	0	28743000	193010000	147780000	114690000	189980000	324340000	251860000	326970000	293280000
AT2G24270	0	21350000	61406000	23449000	95411000	52574000	30407000	30137000	19184000	0	0	49605000	22720000	23282000	18013000	33708000	0	48755000	0	0	0	0	0	2986500	0	0	0	0	0	0	0	0	0	0	0	0	0	0	0	5936000
AT2G24820	0	0	0	0	13568000	0	9070400	0	0	0	0	0	19987000	0	0	0	0	8402800	0	0	0	0	0	0	0	0	0	0	0	0	0	0	0	0	0	0	0	0	0	0
AT2G24940	26164000	0	0	0	22422000	10159000	0	0	0	0	0	0	5003100	0	0	0	0	0	30493000	0	0	0	0	21419000	21494000	20725000	19823000	0	0	0	0	0	0	8930800	0	8905400	27588000	13955000	0	19400000
AT2G25060	2814900	0	0	0	0	0	0	0	0	0	0	2374000	0	0	0	0	0	1844900	2312400	0	0	0	0	2748400	3160800	0	0	0	0	0	0	0	0	0	0	0	0	3451800	0	0
AT2G25080	0	0	0	0	9706800	0	8454900	11542000	0	0	0	0	8839500	0	0	0	0	0	0	0	0	0	0	0	0	0	0	0	0	0	0	0	0	0	0	0	0	0	0	0
AT2G25210.1;AT4G31985.1	282060000	0	242610000	0	147790000	0	0	98856000	30476000	0	34061000	0	0	99769000	71828000	0	65321000	8169300	176450000	297650000	0	44997000	0	14342000	399260000	389560000	0	0	0	0	0	96977000	124570000	114240000	0	0	98591000	0	72038000	77356000
AT2G25430	21938000	0	0	0	0	0	0	0	0	0	0	9401700	0	0	0	0	0	11909000	0	0	0	0	0	0	0	9095700	0	0	0	0	0	0	7152200	17358000	0	0	0	0	0	12980000
AT2G25450	37828000	0	5989400	0	13793000	13450000	40063000	0	6355500	0	0	15651000	17812000	5300500	0	0	0	37253000	23818000	0	0	0	0	29362000	9727100	0	14992000	0	0	0	0	0	16537000	14542000	0	152600000	23634000	9164800	9493000	56443000
AT2G25980	13358000	0	0	0	0	0	0	0	0	0	0	0	0	0	0	0	0	0	14471000	0	0	0	0	57150000	15791000	7738000	2426500	0	27416000	0	0	0	0	6886600	0	18905000	4486500	5785700	0	5711400
AT2G26080	30651000	0	20935000	0	50082000	29428000	26693000	39649000	29696000	0	22405000	28420000	25745000	0	0	11798000	0	25974000	10828000	0	0	0	0	11879000	7657700	0	0	0	0	0	0	0	11524000	0	0	17028000	10279000	10772000	11869000	14359000
AT2G26230	4879700	0	0	0	0	0	0	0	0	0	0	3601900	0	0	0	0	0	0	3776900	0	0	0	0	6220500	3238200	0	0	0	0	0	0	0	0	0	0	4052400	0	5005000	5228500	0
AT2G27020	31160000	0	0	0	32856000	0	18835000	0	0	0	0	20265000	30946000	24127000	0	0	0	26291000	71614000	0	0	0	30845000	28864000	23082000	0	18921000	0	31428000	0	0	0	0	20204000	0	29224000	51052000	53321000	19517000	33743000
AT2G27530.2;AT2G27530.1	1247400000	35528000	1288900000	14909000	599200000	18348000	88223000	889680000	1015700000	593240000	347970000	24058000	202990000	667530000	525800000	0	514320000	84115000	917020000	1542100000	0	564880000	28677000	947550000	1397200000	1862100000	0	208010000	0	119430000	1339000000	842120000	1022400000	403330000	31929000	217340000	2039600000	448630000	478100000	607970000
AT2G27710.3;AT2G27710.2;AT2G27710.1;AT2G27710.4	895730000	88693000	1645500000	0	1126400000	17694000	41119000	2349800000	1362700000	565830000	360620000	29160000	229410000	1031900000	732330000	0	783030000	34697000	3531100000	2549100000	0	1769000000	23615000	1322200000	4183800000	2825100000	0	125010000	0	573110000	2185400000	1822900000	2103500000	735140000	35836000	94226000	2274600000	1304400000	723860000	1028200000
AT2G27720.1;AT2G27720.3;AT2G27720.2	335400000	44937000	618270000	12062000	404040000	17984000	44964000	734720000	951450000	372640000	260770000	25853000	139050000	582080000	693500000	0	572250000	8182500	1136400000	1448500000	0	450280000	39659000	620310000	1730100000	1557700000	0	128350000	0	85289000	722570000	726800000	505350000	382640000	33345000	63900000	774020000	582160000	393420000	422570000
AT2G28000	31789000	20426000	121000000	14233000	753180000	82828000	278450000	84113000	31845000	0	9118900	120970000	234840000	265870000	82103000	145860000	0	203710000	104790000	0	6458900	0	13247000	100970000	28347000	9109100	7682400	0	14393000	0	0	0	4448500	4720100	0	55421000	25267000	24922000	16875000	37150000
AT2G28190.1	0	11930000	0	16416000	8368100	11353000	0	5318800	0	0	0	8421900	17447000	0	0	0	3893100	11381000	0	0	0	0	5745300	9105100	0	0	0	0	0	0	0	0	4483300	0	5237000	9823700	0	11857000	0	0
AT2G28900	0	0	0	0	5722300	2725100	10762000	5490300	0	0	0	3945000	11788000	4382400	3278800	0	0	0	0	0	0	0	0	0	0	0	0	0	0	0	0	0	0	0	0	2204300	0	0	0	0
AT2G29550	2946500	0	0	0	0	0	0	0	0	0	0	0	0	0	0	0	0	0	0	0	0	0	0	12324000	0	0	0	0	0	0	0	0	0	0	0	21244000	0	0	0	0
AT2G29560	3511300	0	0	0	0	0	0	0	0	0	0	0	4665900	0	0	0	0	0	0	0	0	0	0	0	0	0	0	0	0	0	0	0	0	0	0	7268200	0	0	0	0
AT2G30110	43053000	0	0	0	22289000	13095000	15548000	15506000	13184000	0	0	21700000	14377000	12742000	0	0	0	21925000	18914000	0	0	0	10090000	19530000	21880000	11345000	15630000	0	0	62707000	0	0	10700000	10963000	0	18028000	18021000	20879000	20019000	23495000
AT2G30210	3006700	0	0	0	0	0	0	0	0	0	0	0	0	0	0	0	0	0	68478000	0	13775000	0	23292000	18767000	15046000	0	0	0	0	0	0	0	5464400	6328400	0	6219800	0	5853300	0	4885300
AT2G30490	209210000	0	0	0	16957000	3040700	15175000	0	0	0	0	5615800	23715000	0	0	0	0	13694000	24271000	0	0	0	0	116510000	23910000	13286000	23429000	0	17070000	28566000	0	0	6977300	19959000	5250900	798560000	43541000	56185000	102410000	139790000
AT2G30750	7631900	0	0	0	0	0	0	0	0	0	0	0	0	0	0	0	0	0	0	0	0	0	0	0	0	0	0	0	0	0	0	0	0	0	0	32573000	0	0	6585900	0
AT2G30860	925700000	95626000	183450000	103420000	273020000	265120000	377420000	339140000	297500000	211440000	188850000	287110000	337500000	282630000	167360000	189100000	0	327470000	423500000	40549000	104230000	0	291400000	461300000	403480000	219930000	314960000	0	434830000	82671000	0	0	150920000	221920000	176950000	326770000	291640000	420450000	241450000	507260000
AT2G30870	192500000	0	46663000	16001000	89025000	62891000	120650000	94378000	64066000	65395000	77874000	110800000	96697000	104380000	63388000	75638000	0	72887000	132680000	0	33505000	0	120270000	149020000	153990000	62884000	78866000	0	157230000	85716000	0	44419000	55539000	63186000	53223000	114080000	136390000	131590000	86684000	113750000
AT2G30950	0	0	12174000	0	29040000	15724000	16405000	14870000	0	0	0	9876000	17735000	12331000	0	0	0	21070000	0	0	0	0	0	0	0	0	0	0	0	0	0	0	0	0	0	0	0	0	0	0
AT2G30970	78583000	0	47665000	21338000	42641000	36877000	48922000	39198000	49822000	0	44240000	29712000	41453000	46846000	38867000	55230000	0	51696000	36572000	0	19848000	0	32856000	41182000	16625000	28092000	40048000	0	53817000	0	0	0	29373000	26846000	0	49374000	38611000	22715000	52491000	51821000
AT2G31390	729740000	0	21159000	0	38705000	21077000	42251000	11561000	11257000	0	0	27189000	61059000	39943000	0	45552000	0	52479000	225550000	64189000	109940000	0	250240000	364360000	175350000	117340000	174310000	0	143080000	36494000	0	0	198100000	136550000	89436000	354170000	393010000	421520000	293410000	299600000
AT2G31610.1	71653000	41898000	24313000	52759000	259610000	236570000	125270000	91284000	61644000	188060000	124440000	205740000	35714000	22809000	31634000	0	427660000	811650000	62669000	176390000	0	642280000	386740000	264810000	207950000	394680000	0	226890000	932530000	86485000	146250000	270470000	379250000	429470000	190050000	0	20929000	24523000	238340000	593190000
AT2G32060.3;AT2G32060.2;AT2G32060.1	48181000	105600000	0	198260000	424110000	277670000	217770000	81054000	55047000	346060000	370070000	230030000	98181000	33672000	0	0	626830000	1393700000	82285000	200980000	0	603780000	933270000	707300000	161660000	520870000	0	228180000	819380000	196780000	62207000	198210000	761730000	589240000	202470000	80553000	77137000	29932000	240170000	584780000
AT2G32080	7769000	0	0	0	3005600	0	0	0	0	0	0	0	0	0	0	0	0	0	0	0	0	0	0	4344200	0	0	0	0	0	0	0	0	0	0	0	0	0	0	0	3380500
AT2G32240.1;AT1G05320.3;AT1G05320.2;AT1G05320.1	0	0	0	4994700	0	6981600	0	0	0	0	13571000	0	0	0	0	0	9924000	5981100	0	0	0	0	8769300	7453700	0	0	0	0	0	0	0	0	7424400	0	6477800	14935000	16331000	0	6271400	9971900
AT2G32520	16345000	4110900	12802000	0	13851000	0	10921000	0	0	0	0	0	0	8671900	0	0	0	0	16608000	0	0	0	6200800	15030000	6730300	0	9230500	0	0	0	0	0	0	6914000	0	0	12056000	4943200	0	0
AT2G32730	3794400	0	0	0	16483000	0	22520000	0	0	0	0	11542000	52478000	18246000	0	0	0	0	12854000	0	0	0	0	11938000	6370300	0	0	0	0	0	0	0	0	0	0	40872000	17895000	25539000	0	9137700
AT2G32920	7470900	0	5510800	0	4462900	5796800	0	0	0	0	0	0	0	0	0	0	0	5426300	8734600	0	0	0	6774300	11225000	0	6285100	5240700	0	0	0	0	0	5454100	4567600	0	12629000	10077000	0	0	10600000
AT2G33040	131610000	0	0	0	218280000	19312000	128310000	38501000	0	0	0	26130000	163860000	27539000	0	0	0	34515000	31797000	0	0	0	0	259870000	40080000	9409700	37415000	0	21969000	37147000	0	0	33003000	28802000	0	133930000	81929000	31683000	41840000	87908000
AT2G33150	107010000	0	29595000	0	34504000	34321000	53651000	60778000	57128000	0	0	57982000	52121000	58873000	29783000	24881000	0	54058000	55562000	0	15831000	0	63403000	38120000	36677000	29715000	34511000	0	64906000	0	0	0	27070000	43995000	35916000	24546000	16033000	27062000	30217000	41706000
AT2G33210	79142000	0	40097000	0	199190000	14861000	83050000	36475000	20916000	0	0	32330000	90568000	65113000	36923000	48643000	0	38785000	126510000	10879000	23204000	0	53147000	91048000	47342000	26161000	24418000	0	0	123570000	0	0	22260000	17314000	20334000	88318000	76665000	52212000	56490000	58617000
AT2G33220	1576600	0	0	0	16214000	0	7831400	0	0	0	0	0	20692000	0	0	0	0	0	0	0	0	0	0	0	0	0	0	0	0	0	0	0	0	0	0	0	0	0	0	0
AT2G33340	4199500	0	0	0	0	6396300	12721000	0	0	0	21045000	15217000	11632000	11150000	0	12610000	0	22325000	0	0	0	0	0	0	0	0	0	0	20040000	0	0	0	8543800	21385000	12421000	0	0	8368700	0	8996600
AT2G33450.1	214610000	939820000	485430000	0	146500000	0	649540000	262270000	0	0	79932000	27727000	770310000	77543000	70445000	0	110280000	0	0	0	0	0	0	76759000	0	0	0	0	0	0	0	0	0	0	0	49082000	35125000	0	0	0
AT2G33800.1	235600000	550450000	142660000	1440700000	640410000	1678000000	432530000	115580000	215820000	212270000	687450000	1236800000	363480000	178160000	324520000	0	374890000	90841000	0	4261400	0	21074000	140490000	14546000	5184500	15577000	0	24395000	0	0	0	0	1598500	17136000	14327000	0	4606400	0	3343400	20257000
AT2G34480.1	821580000	29060000	454970000	12133000	344740000	10253000	64910000	713180000	978870000	335180000	346190000	0	154280000	376660000	464150000	0	516990000	41690000	1507600000	838260000	0	486100000	6942900	369220000	2112800000	1154400000	0	147420000	0	294020000	1126400000	750300000	608090000	246370000	0	69359000	1291700000	375720000	355790000	472060000
AT2G34590	0	0	92987000	0	78068000	0	46934000	26150000	0	0	0	0	45186000	19694000	0	0	0	0	66123000	0	0	0	0	129580000	69973000	38170000	28478000	0	0	0	0	0	10983000	0	0	0	0	0	0	0
AT2G34970.1;AT3G02270.1	0	0	0	3261300	0	3454000	0	0	0	0	0	4300300	0	0	0	0	0	0	0	0	0	0	4263600	0	0	0	0	0	0	0	0	0	0	0	9225500	0	0	0	3087300	0
AT2G35040	11656000	0	0	0	13325000	10074000	15791000	0	0	0	0	8589300	9874000	0	0	0	0	23359000	9168400	0	0	0	7815500	8894400	6438700	0	9896900	0	0	0	0	0	7017800	2643700	0	0	8476300	0	0	12178000
AT2G35120	9978500	0	0	0	0	0	0	0	0	0	0	0	0	0	0	0	0	0	0	0	0	0	0	11863000	0	0	0	0	0	0	0	0	0	0	0	9456200	0	3744400	0	0
AT2G35370	0	0	0	0	27361000	0	0	0	0	0	0	15096000	7334200	9830800	0	0	0	0	0	0	0	0	0	0	0	0	0	0	0	0	0	0	0	0	0	0	0	0	0	0
AT2G35390	0	0	0	0	4023700	0	7968500	0	0	0	0	0	15949000	0	0	0	0	0	0	0	0	0	0	0	0	0	0	0	0	0	0	0	0	0	0	7262600	0	0	0	0
AT2G35490	0	0	0	0	11136000	0	6114000	0	0	0	0	4725600	0	0	0	0	0	5018100	0	0	0	0	0	0	0	0	0	0	0	0	0	0	0	0	0	0	0	0	0	0
AT2G36460	145470000	24160000	34428000	27156000	77355000	86668000	49010000	41395000	0	0	60299000	99994000	59779000	82576000	43995000	37126000	0	86351000	46905000	0	27288000	0	61664000	37144000	76080000	23670000	39427000	0	56728000	0	0	0	25357000	41653000	38015000	31494000	77709000	92447000	49463000	53019000
AT2G36530	1825500000	195470000	295700000	170480000	405950000	261070000	519940000	540430000	403490000	425570000	523410000	444940000	484770000	646390000	417610000	476630000	0	725640000	577350000	134190000	273580000	27705000	624310000	719990000	529750000	382430000	517370000	0	711960000	609190000	211000000	259890000	347170000	534110000	472170000	442400000	650820000	718110000	590840000	945930000
AT2G36580	28765000	0	0	0	5924800	4422500	8692300	0	0	0	0	7854300	6496600	7401100	0	0	0	13061000	9298800	0	0	0	0	12972000	4164300	5789200	5727600	0	0	0	0	0	0	0	0	10569000	0	6918600	0	10726000
AT2G36830	16178000	0	0	0	0	0	0	50252000	0	0	0	0	0	0	0	0	0	0	132500000	0	0	0	0	71612000	0	0	74646000	0	0	0	0	0	0	0	0	0	0	0	0	0
AT2G36880	356190000	0	0	0	45417000	25630000	67373000	42885000	31662000	0	0	43993000	49971000	32115000	7856300	21041000	0	47039000	57709000	0	0	0	21086000	89663000	48217000	35226000	34201000	0	0	0	0	0	39796000	66053000	9588000	641850000	134840000	115120000	126410000	191930000
AT2G37040	7783300	0	0	0	0	0	0	0	0	0	0	0	0	0	0	0	0	0	8706000	0	0	0	0	13111000	12753000	10518000	11069000	0	20391000	0	0	0	0	9229900	0	13733000	16846000	24266000	28121000	18488000
AT2G37230	253880000	49868000	182480000	217880000	0	62611000	61708000	366710000	151560000	0	0	160150000	0	493230000	55287000	34271000	0	122600000	46739000	70053000	78659000	0	115810000	35222000	771380000	144720000	136290000	0	175030000	0	567970000	81043000	135940000	82566000	90399000	28240000	501960000	905000000	126000000	147020000
AT2G37270.2;AT2G37270.1	161900000	617610000	99268000	437000000	554220000	609110000	446340000	177060000	126270000	551740000	502120000	626210000	170200000	107910000	118710000	0	523540000	2489800000	161730000	458770000	0	1202700000	2145400000	817950000	407730000	346410000	0	247970000	1064800000	283520000	0	710510000	1028800000	957930000	548160000	101100000	167640000	97124000	321370000	741400000
AT2G37660	0	0	22303000	10601000	23210000	18443000	21269000	25491000	13311000	0	0	20011000	16459000	13983000	0	14557000	0	11512000	0	0	0	0	0	0	0	0	0	0	0	0	0	0	0	0	0	0	0	0	0	0
AT2G37690	13673000	0	0	0	10568000	0	0	0	0	0	0	5724200	8112100	9892400	0	0	0	6174700	0	0	0	0	0	8384000	0	0	0	0	0	0	0	0	0	4993200	0	7845700	0	3074300	0	6479600
AT2G37990	0	0	0	0	0	0	0	0	34905000	42143000	0	0	0	12152000	63423000	46850000	0	0	0	0	0	0	0	0	8740800	39005000	15444000	0	0	0	0	0	0	0	0	0	0	20465000	21598000	20602000
AT2G38040	0	0	0	0	19152000	0	9177700	0	0	0	0	6766000	16944000	0	0	0	0	0	7543700	0	0	0	0	9168900	5050500	0	0	0	0	0	0	0	0	7280100	0	14074000	10429000	12062000	0	8131200
AT2G38140.1	0	42827000	0	32557000	0	54857000	17769000	0	0	0	9992700	37676000	13205000	0	0	0	12571000	0	0	0	0	0	0	0	0	0	0	0	0	0	0	0	0	0	0	0	0	0	0	0
AT2G38380	314330000	0	0	0	0	0	0	0	0	0	0	0	19770000	0	0	0	0	0	145350000	0	66787000	0	83627000	139030000	201070000	47169000	86366000	0	114190000	0	0	0	56786000	93627000	67417000	189870000	302420000	463310000	184250000	216960000
AT2G38390	135700000	0	0	0	0	0	0	0	0	0	0	0	0	0	0	0	0	0	37009000	0	0	0	16962000	55519000	36544000	0	24080000	0	0	0	0	0	24922000	27225000	0	47678000	40220000	82972000	44623000	48903000
AT2G38770	4342800	0	0	0	0	6899400	13762000	0	0	0	0	27243000	6090400	6557800	0	0	0	17267000	0	0	0	0	0	0	0	0	0	0	10193000	0	0	0	0	7873500	0	11200000	0	3474200	0	5100300
AT2G38860	32223000	0	0	0	6081600	0	7029500	0	0	0	0	0	0	0	0	0	0	0	7299300	0	0	0	0	5524500	0	0	0	0	0	0	0	0	0	7052900	0	9094400	0	15599000	0	10495000
AT2G39020	2076000	0	0	0	3970500	0	3903900	0	0	0	0	3457000	0	0	0	0	0	0	0	0	0	0	0	3764000	4388600	0	2776200	0	0	0	0	0	0	0	0	3367400	0	4588700	0	3070400
AT2G39310	0	0	0	0	12990000	0	4825700	0	0	0	0	0	0	0	0	0	0	0	38052000	0	0	0	32044000	122120000	97060000	36562000	71179000	0	40788000	0	0	0	0	15799000	0	0	7783800	11100000	0	14747000
AT2G39330	0	0	14623000	7413800	146500000	28806000	21562000	0	0	0	0	14475000	10629000	4976400	0	0	0	12542000	0	0	0	0	0	0	0	0	0	0	0	0	0	0	0	0	0	0	0	0	0	0
AT2G39730	2353200	187020000	348830000	216800000	1949900000	879950000	920630000	460040000	359060000	212190000	378860000	647860000	520800000	364660000	158890000	213430000	0	561860000	20311000	0	0	0	0	30432000	7597300	0	4110300	0	8610800	0	0	0	0	0	0	19634000	0	0	0	1855600
AT2G39770	3212800	0	0	0	7574000	0	7530800	0	0	0	0	4248800	0	5173200	0	0	0	0	0	0	0	0	0	0	2151600	0	0	0	0	0	0	0	0	0	0	28956000	2583600	3309600	0	6893800
AT2G39990.1	0	0	0	56813000	0	30453000	10654000	0	0	0	8845700	88212000	24804000	0	0	0	12980000	0	0	0	0	0	32059000	15338000	0	0	0	0	0	0	0	0	0	0	59010000	14027000	17593000	8859500	18163000	22289000
AT2G40290.1;AT2G40290.3;AT2G40290.2	0	0	0	0	0	0	0	0	0	0	9499100	5379800	0	0	0	0	0	4977800	0	0	0	0	0	4142900	0	0	0	0	0	0	0	0	0	0	0	0	5409700	0	0	0
AT2G40300	0	0	0	0	9317600	0	0	0	0	0	0	0	33508000	135960000	77953000	38875000	0	9014800	26125000	0	15396000	0	0	26594000	18268000	17196000	0	0	0	0	0	0	0	0	0	24749000	29024000	30276000	0	0
AT2G40360	8238600	0	0	0	0	0	0	0	0	0	0	3229000	0	0	0	16407000	0	14087000	0	0	0	0	0	0	5618000	56098000	11358000	0	0	0	0	0	11013000	3935800	0	5105200	0	213500000	5884200	4928300
AT2G40490.1	0	0	0	15366000	6018900	10234000	0	0	0	0	7622400	7447300	0	0	0	0	5666600	0	0	0	0	0	0	0	0	0	0	0	0	0	0	0	0	0	0	0	0	0	0	0
AT2G40660	18834000	0	0	0	28296000	0	17864000	0	0	0	0	0	8523400	5234300	0	0	0	9510000	18648000	0	0	0	0	24387000	12816000	0	0	0	19844000	0	0	0	0	7612800	0	88521000	134510000	117340000	58846000	28407000
AT2G40800.1;AT3G56430.1	0	0	0	3249500	0	4236100	0	0	0	0	0	3194600	0	0	0	0	0	0	0	0	0	0	0	0	0	0	0	0	0	0	0	0	0	0	8917300	0	1971800	0	4300100	0
AT2G40840	7161900	0	0	0	9497300	6398400	14965000	0	8817800	0	0	0	10394000	12448000	0	0	0	9442700	0	0	0	0	0	4805300	0	0	0	0	0	0	0	0	0	0	0	0	0	0	0	0
AT2G40890	6333200	0	0	0	0	0	0	0	0	0	0	0	0	0	0	0	0	0	0	0	0	0	0	0	0	0	0	0	0	0	0	0	0	0	0	24234000	0	0	0	9103200
AT2G41220	51615000	0	0	0	0	0	0	0	0	0	0	0	0	0	0	0	0	0	9972800	0	0	0	0	12914000	11421000	0	0	0	0	0	0	0	0	0	0	19459000	12323000	19185000	13685000	12621000
AT2G41530	3301600	11654000	0	0	19754000	14937000	17119000	0	0	0	0	14852000	0	13492000	0	0	0	12156000	19935000	0	0	0	21857000	15678000	15106000	0	11087000	0	0	0	0	0	0	10538000	0	8362300	13547000	10006000	0	10674000
AT2G41620	1292700	0	0	0	2508400	0	0	0	0	0	0	0	0	0	0	0	0	0	0	0	0	0	0	0	0	0	0	0	0	0	0	0	0	0	0	12387000	0	0	0	0
AT2G41740	7070600	0	0	0	5062600	0	4810900	0	0	0	0	5354000	0	0	0	0	0	0	0	0	0	0	0	0	0	0	0	0	0	0	0	0	0	0	0	14180000	0	0	0	4345000
AT2G41790	5200600	0	5195500	0	6488500	0	0	0	0	0	0	0	7371200	0	0	0	0	0	4246900	0	0	0	0	0	0	0	0	0	0	0	0	0	0	0	0	9351900	0	0	0	0
AT2G41800	16810000	0	0	0	0	0	0	0	0	0	0	0	0	0	0	0	0	0	0	0	0	0	0	8451700	0	0	0	0	0	0	0	0	0	0	0	50133000	0	7971700	12014000	10605000
AT2G41840.1	184250000	172900000	151020000	94648000	628620000	429320000	374000000	178290000	153410000	723770000	317740000	362870000	149770000	68327000	89634000	0	818440000	1071800000	151000000	380510000	0	804460000	808940000	509160000	244300000	544750000	0	206360000	227460000	249120000	185100000	435400000	855850000	565580000	304300000	88437000	93436000	50888000	383530000	1022000000
AT2G42210	24422000	0	0	0	6638000	0	0	0	0	0	0	4412700	0	0	0	0	0	5176300	0	0	0	0	0	7484900	0	0	0	0	0	0	0	0	0	0	0	0	0	0	0	0
AT2G42490	1377600	0	0	0	2398400	0	0	0	0	0	0	0	0	0	0	0	0	3229300	3599300	0	0	0	0	5315200	0	0	0	0	0	0	0	0	0	0	0	7961300	0	3969300	0	0
AT2G42590	10829000	0	47714000	0	29787000	30294000	32079000	69068000	0	0	53813000	103720000	26248000	0	0	0	0	0	18191000	0	0	0	0	22441000	0	0	32486000	0	0	0	0	0	0	0	0	16699000	0	19880000	0	26706000
AT2G42600	2127400	0	14380000	8197700	30402000	17189000	33910000	17836000	10744000	0	0	24048000	36612000	23629000	10169000	18227000	0	50225000	0	0	0	0	0	5130100	7043200	5058400	0	0	0	0	0	0	0	6908700	0	9080000	0	0	0	0
AT2G42690	0	0	6208100	0	8405500	4807200	0	0	0	0	0	0	0	0	0	0	0	6886800	0	0	0	0	0	0	0	0	0	0	0	0	0	0	0	0	0	0	0	0	0	0
AT2G42710.1	0	57783000	51439000	0	26819000	0	125090000	11676000	0	0	28878000	0	114830000	0	0	0	52747000	10145000	22161000	17775000	0	12068000	0	335390000	54389000	54015000	0	37558000	0	44474000	24581000	30445000	34847000	38112000	6062700	164190000	526860000	29871000	64206000	57917000
AT2G42910	24823000	0	0	0	25871000	9921100	9958700	9819400	0	0	0	11963000	0	17054000	0	0	0	10841000	22181000	0	0	0	0	26001000	11503000	0	8032100	0	0	0	0	0	0	13272000	0	19879000	27652000	24976000	21437000	19911000
AT2G43030.1	725260000	6517500000	3851800000	57705000	774860000	34374000	3887800000	1065100000	450410000	312690000	732840000	59930000	3308500000	537920000	625480000	0	560160000	36128000	0	5719800	0	10366000	1200300	386980000	36740000	38558000	0	18831000	0	184920000	10721000	22474000	8722900	14893000	0	228020000	125490000	4632300	9280000	18959000
AT2G43100	8115700	0	0	0	2687300	3192100	0	0	0	0	0	0	0	0	0	0	0	0	5032300	0	0	0	6254800	12443000	0	0	0	0	8623100	0	0	0	0	3406500	0	0	11281000	0	0	0
AT2G43535	8009000	0	0	0	0	0	0	0	0	0	0	0	0	0	0	0	0	0	30885000	0	0	0	9669400	11989000	11641000	0	0	0	0	0	0	0	0	8495700	0	0	0	6520400	0	0
AT2G43590	2757500	0	0	0	0	0	23246000	19038000	0	12526000	0	11653000	0	7307300	0	0	0	0	0	0	0	0	0	0	0	0	0	0	0	0	0	0	0	0	0	5078100	0	0	0	0
AT2G43610	44460000	0	0	0	0	6125200	0	0	0	0	0	0	0	0	32037000	0	0	0	81956000	0	30707000	0	72413000	29781000	10978000	11574000	9414000	0	13871000	87232000	0	0	33712000	58113000	38101000	110220000	67787000	105140000	56191000	26211000
AT2G43750	13153000	0	28365000	0	52046000	25271000	40966000	32567000	33222000	0	21277000	31382000	35061000	37663000	30472000	39915000	0	24535000	20825000	0	0	0	23873000	20105000	23733000	11316000	12185000	0	35255000	0	0	0	13908000	10990000	0	14806000	18327000	26178000	16992000	28273000
AT2G43770	4965100	0	0	0	0	7112300	0	0	0	0	0	0	0	0	0	0	0	11335000	0	0	0	0	8857000	0	0	0	0	0	0	0	0	0	0	0	0	0	0	0	0	0
AT2G43910	20203000	0	15356000	0	15106000	7898100	19504000	0	0	0	0	0	10692000	11554000	0	0	0	0	13946000	0	0	0	19350000	34000000	8740300	0	24975000	0	20328000	0	0	0	14034000	0	0	9113800	0	9631200	16628000	16033000
AT2G44050	57242000	0	69046000	0	548480000	8366100	81326000	0	11701000	0	0	8879700	80319000	10394000	8564500	18912000	0	19938000	75200000	0	18324000	0	12849000	91708000	6628300	10915000	0	0	0	0	0	0	6595000	2860700	0	77005000	26318000	18254000	18869000	6447500
AT2G44060	109160000	0	21159000	0	34219000	13802000	35953000	31947000	0	0	0	27362000	34032000	22129000	20091000	0	0	17763000	40807000	0	0	0	19917000	57509000	41614000	32361000	27376000	0	0	0	0	0	15221000	16801000	0	43466000	34906000	45642000	36275000	45016000
AT2G44065.2;AT2G44065.1	0	0	0	0	0	0	0	0	0	0	0	0	0	0	0	0	0	0	0	0	0	0	0	52909000	0	0	0	0	0	0	0	0	0	0	0	13669000	68466000	0	19535000	0
AT2G44120.1;AT2G44120.2	654390000	25813000	699700000	0	227750000	8202400	32468000	899490000	739510000	432760000	254830000	0	148280000	756280000	378730000	0	275210000	20084000	1134200000	809890000	0	668770000	7143800	548320000	1457100000	1296000000	0	190960000	0	0	1903800000	1154000000	1023800000	112090000	5897400	32621000	793370000	435080000	48696000	191400000
AT2G44160	18346000	0	0	0	3692300	0	4899200	0	0	0	0	10563000	3437300	2836300	0	0	0	0	2314800	0	0	0	0	3558500	0	0	0	0	3866700	0	0	0	0	0	0	77510000	0	4148800	0	6072400
AT2G44350.1;AT2G44350.2;AT3G60100.1	0	8362100	0	19575000	9794100	27949000	18366000	15090000	0	0	23374000	21291000	22308000	0	0	0	25195000	21787000	0	0	0	0	34598000	19835000	18273000	19515000	0	39872000	0	0	0	14764000	24891000	13912000	22517000	25348000	21529000	12363000	23025000	21381000
AT2G44530	1370600	0	0	0	5395300	0	9555900	0	0	0	0	0	29283000	4721500	0	0	0	0	2871600	0	0	0	0	13560000	0	0	0	0	0	0	0	0	0	0	0	15983000	0	1509000	0	0
AT2G44610	23031000	0	0	0	0	0	11209000	0	0	0	0	0	0	0	0	0	0	0	0	0	0	0	0	10251000	0	0	0	0	0	0	0	0	0	10145000	0	14014000	0	0	0	11554000
AT2G44640	0	0	0	0	10278000	0	8378000	0	0	0	0	0	11963000	0	0	0	0	0	0	0	0	0	0	0	0	0	0	0	0	0	0	0	0	0	0	6637700	0	0	0	0
AT2G44650	0	0	9654700	0	12872000	8825200	8718800	0	0	0	0	8582600	0	11446000	0	9115300	0	11501000	0	0	0	0	0	4397300	0	0	0	0	0	0	0	0	0	0	0	0	0	0	0	0
AT2G44790	52440000	0	0	0	0	0	0	0	0	0	0	0	0	0	0	0	0	0	66998000	0	0	0	0	54241000	26283000	0	21157000	0	22388000	0	0	0	0	0	0	44045000	28743000	67831000	0	39247000
AT2G44860.2;AT2G44860.1	40652000	0	33649000	0	0	0	0	0	55290000	0	0	0	57671000	113780000	68660000	0	24322000	0	0	0	0	0	0	59611000	97453000	39710000	0	0	0	0	36133000	0	12616000	0	0	33679000	329590000	79300000	58011000	0
AT2G45030.1;AT1G45332.1	0	0	0	0	0	0	0	0	0	0	0	0	0	0	0	0	0	0	0	0	0	0	0	0	0	0	0	0	0	0	0	0	0	0	9621500	0	3628200	3746400	0	0
AT2G45220	0	0	0	0	0	0	9912700	0	0	0	0	0	0	0	0	0	0	0	13621000	0	0	0	0	12102000	0	0	0	0	0	0	0	0	0	0	0	0	0	0	0	4619700
AT2G45470	59887000	26238000	46342000	15140000	54640000	20094000	39744000	34382000	22546000	0	0	30493000	29652000	22230000	17220000	0	0	20879000	32388000	0	0	0	22330000	26695000	14858000	0	0	0	22973000	0	0	0	16679000	14166000	0	39716000	39620000	31048000	26197000	16599000
AT2G45540	0	0	0	0	0	0	2362200	0	0	0	0	0	2598200	0	0	0	0	0	0	0	0	0	0	0	0	0	0	0	0	0	0	0	0	0	0	24086000	0	0	0	0
AT2G45710.1;AT3G61110.1;AT3G61111.1	52751000	114150000	21486000	21611000	127400000	221960000	122230000	55292000	37304000	112020000	91319000	200540000	66795000	20211000	33147000	0	246530000	554890000	44481000	128240000	0	338730000	405350000	215300000	123600000	146960000	0	74780000	422660000	190250000	0	163110000	334120000	311620000	99198000	12550000	14653000	19797000	100040000	197810000
AT2G45790	13658000	0	0	0	5851100	5712000	0	0	0	0	0	5995100	0	0	0	0	0	0	0	0	0	0	0	0	3678200	0	0	0	0	0	0	0	0	0	0	7647100	7645400	5157600	0	10395000
AT2G45960	0	0	0	0	10371000	0	0	0	0	0	0	0	0	0	0	0	0	0	17890000	0	0	0	0	5189600	8248500	0	0	0	0	0	0	0	0	28649000	24516000	18967000	0	7252800	0	0
AT2G46280.2;AT2G46280.1;AT2G46280.3;AT2G46290.1	0	0	0	25103000	0	20171000	0	0	0	0	6707400	52739000	24783000	0	0	0	13962000	12350000	0	0	0	0	15369000	15122000	12353000	7997800	0	0	0	0	0	0	9411200	0	10159000	12446000	12542000	0	15329000	9886500
AT2G46520	0	0	0	0	6745300	0	4494900	0	0	0	0	4148100	5876100	0	0	0	0	0	5063800	0	0	0	0	0	0	0	0	0	0	0	0	0	0	0	0	43132000	0	3380300	0	0
AT2G46750	3624400	0	0	0	0	0	0	0	0	0	0	0	0	0	0	0	0	0	11047000	0	0	0	0	13059000	6439200	6855100	0	0	0	0	0	0	7755400	13714000	0	7973000	13708000	15940000	10753000	15967000
AT2G46820	0	0	0	0	12435000	0	0	0	0	0	0	7308000	7774800	0	0	0	0	0	0	0	0	0	0	0	0	0	0	0	0	0	0	0	0	0	0	0	0	0	0	0
AT2G47000	36098000	0	0	0	8140300	0	0	0	0	0	0	0	21836000	10300000	0	0	0	0	22913000	0	0	0	0	12667000	5472200	8903000	4294500	0	0	42912000	0	0	14283000	24543000	0	50595000	8405000	6058700	16348000	10945000
AT2G47390	12036000	0	0	0	12425000	10350000	18305000	16068000	0	0	0	24610000	10271000	17367000	0	0	0	12019000	8092400	0	0	0	0	11368000	10252000	0	0	0	0	0	0	0	0	6479700	0	9395100	0	14686000	0	14428000
AT2G47400	0	0	58730000	0	29475000	14811000	21490000	0	28415000	0	0	0	0	36978000	22416000	0	0	0	0	0	0	0	0	0	0	0	0	0	0	0	0	0	0	0	0	0	0	0	0	0
AT2G47470.3;AT2G47470.4;AT2G47470.1;AT2G47470.2	0	16877000	0	21801000	12867000	20164000	24974000	0	0	0	16192000	25521000	16891000	0	0	0	21084000	43479000	0	11239000	0	18652000	37865000	24324000	16608000	23397000	0	17324000	0	0	0	0	24168000	24273000	26847000	31735000	26219000	26662000	39317000	24072000
AT2G47510	46765000	0	0	0	10693000	0	18050000	20019000	0	0	0	17366000	14400000	18267000	0	0	0	10864000	8141200	0	0	0	0	19180000	12855000	0	0	0	17206000	30898000	0	0	10589000	5204000	0	12570000	0	15421000	0	14387000
AT2G47610.1	515380000	21931000	660270000	0	234630000	0	33716000	505390000	725920000	264260000	190770000	0	120330000	786970000	127020000	0	244910000	20302000	811090000	774170000	0	280250000	0	244200000	451590000	591680000	0	76397000	0	149120000	831810000	232070000	566810000	173900000	5020800	0	919160000	86305000	224200000	374560000
AT2G47710	9269900	0	0	0	5309200	0	14646000	0	0	0	0	8898900	0	0	0	0	0	0	0	0	0	0	0	12935000	0	0	0	0	0	0	0	0	0	0	0	21129000	0	0	0	0
AT2G47730	200480000	0	10884000	0	31008000	23264000	35228000	40409000	18886000	0	0	26263000	22622000	25940000	0	0	0	28766000	52593000	0	21760000	0	25658000	73238000	59785000	46289000	61009000	0	120980000	100360000	0	31331000	25901000	85459000	66288000	39470000	42174000	38526000	45092000	61143000
AT2G47960	0	0	0	0	0	0	0	0	0	0	0	0	0	0	0	0	0	0	0	0	0	0	0	0	0	0	0	0	0	0	0	0	0	0	0	13680000	3711300	3117100	0	2267500
AT3G01190	11320000	0	0	0	0	0	0	0	0	0	0	0	0	0	0	0	0	0	9837600	0	0	0	0	11698000	0	0	0	0	0	0	0	0	0	0	0	37145000	0	0	7865500	0
AT3G01280	182830000	0	10075000	0	46914000	43451000	47489000	24741000	0	0	0	45846000	59730000	29699000	0	14992000	0	71658000	50552000	0	0	0	25365000	50618000	27641000	17787000	21985000	0	53275000	157680000	0	0	34588000	84921000	96348000	133510000	29957000	34366000	39715000	40875000
AT3G01290	21869000	0	0	0	80902000	0	258260000	61940000	26158000	0	0	22785000	69386000	24840000	0	0	0	8542500	78178000	0	0	0	9854600	88963000	33737000	16009000	14839000	0	0	160780000	0	0	77277000	66653000	60606000	69047000	22775000	26395000	0	22234000
AT3G01390	20597000	0	72969000	29258000	429880000	29058000	320570000	78957000	59676000	0	27496000	52255000	442040000	159420000	69970000	70736000	0	66639000	155360000	0	64121000	0	50921000	226350000	55828000	37347000	34555000	0	37508000	0	0	0	50517000	53709000	32339000	174330000	94131000	86409000	83334000	22330000
AT3G01420	609450000	0	0	0	3317200	0	0	0	0	0	0	0	3968200	0	0	0	0	0	200160000	0	32997000	0	64393000	267370000	179810000	115580000	141940000	0	123020000	0	0	0	108680000	127120000	31551000	336600000	282640000	360220000	230390000	226960000
AT3G01500	0	257130000	350830000	305190000	791450000	466370000	337180000	366970000	186770000	209810000	367170000	560750000	172670000	231580000	155060000	190080000	0	206570000	0	0	0	0	0	0	0	0	0	0	0	0	0	0	0	0	0	0	0	0	0	0
AT3G01670	1058500	0	0	0	0	0	0	0	0	0	0	0	0	0	0	0	0	0	10416000	0	0	0	0	10631000	0	0	0	0	0	0	0	0	0	2190600	0	0	0	0	0	0
AT3G01780	0	0	0	0	8220100	0	13091000	0	0	0	0	0	13658000	0	0	0	0	0	0	0	0	0	0	11138000	0	0	0	0	0	0	0	0	0	0	0	15667000	0	0	0	0
AT3G01790.2;AT3G01790.1	0	8132100	42370000	0	10123000	0	31381000	9580500	0	8761900	25177000	0	127130000	9751500	8967800	0	19513000	7231500	0	6345500	0	19425000	11620000	253280000	0	11730000	0	20259000	0	84008000	22604000	0	0	17209000	0	201150000	534760000	10483000	27087000	54144000
AT3G02080.1	59215000	372380000	41937000	188250000	309360000	497240000	67768000	210890000	0	0	96345000	418100000	75115000	49302000	182170000	0	869420000	976620000	235650000	293070000	0	757220000	1811600000	227680000	486200000	422580000	0	302050000	109040000	0	0	385940000	0	0	269310000	54334000	23290000	47385000	371610000	1702400000
AT3G02090	462810000	0	21213000	0	48629000	33043000	76861000	28792000	18358000	0	0	37336000	66455000	30596000	6652500	0	0	35868000	44162000	0	0	0	0	138480000	44320000	14768000	38339000	0	32250000	0	0	0	18709000	43965000	0	433440000	72534000	101290000	102860000	177180000
AT3G02190.1	0	0	0	0	0	0	0	0	0	0	0	0	0	0	0	0	18839000	0	59071000	0	0	0	0	0	0	0	0	0	0	0	0	0	0	0	0	0	0	0	0	21038000
AT3G02200	7233400	0	0	0	19064000	0	19733000	0	0	0	0	0	55801000	0	0	0	0	8291500	8140700	0	0	0	0	15593000	0	9806200	0	0	0	0	0	0	0	0	0	19514000	7358500	4837300	0	15996000
AT3G02230	51528000	0	0	0	12308000	11384000	15146000	0	0	0	0	15462000	11137000	32354000	0	0	0	34183000	59056000	21492000	20957000	0	58147000	34584000	10981000	22600000	26041000	0	26402000	0	0	0	37348000	12570000	0	71764000	37759000	35223000	42542000	50203000
AT3G02260	9255900	0	0	0	11342000	0	31245000	0	0	0	0	4009600	40662000	0	0	0	0	0	3426900	0	0	0	0	5758700	0	0	0	0	0	0	0	0	0	0	0	66329000	0	11642000	0	6656200
AT3G02360	163880000	0	0	0	32808000	10226000	51615000	16822000	0	0	0	31384000	30674000	12696000	0	0	0	23675000	38364000	0	0	0	13645000	52508000	32276000	21173000	24873000	0	40895000	0	0	0	13152000	29797000	29989000	268470000	49431000	63002000	65745000	87163000
AT3G02520	17239000	0	0	0	7797600	0	0	0	0	0	0	10572000	0	0	0	0	0	8707500	13105000	0	0	0	0	8128600	8018100	0	0	0	0	0	0	0	0	0	0	0	8768900	8692000	0	7381800
AT3G02530	3728400	0	0	0	0	0	0	0	0	0	0	0	13796000	0	0	0	0	0	0	0	0	0	0	10091000	0	0	0	0	0	0	0	0	0	0	0	21303000	0	0	0	9589300
AT3G02560.2;AT3G02560.1	115640000	150720000	87444000	89624000	359460000	516280000	213870000	135510000	48140000	193400000	221090000	323700000	107910000	28432000	50343000	0	653910000	1289300000	96993000	280060000	0	592000000	1138400000	451750000	297940000	515770000	0	182550000	407380000	0	0	326280000	823220000	446410000	243410000	30529000	43127000	45925000	266600000	682060000
AT3G02650	135610000	0	0	0	0	4777900	27890000	5805800	15398000	0	0	57781000	31957000	6676200	0	0	0	41996000	276180000	0	6475800	0	33517000	210050000	24469000	7108300	23614000	0	63572000	0	0	0	22639000	25800000	42702000	131910000	6601600	2555500	10287000	53011000
AT3G02760	27252000	0	0	0	0	0	5922600	0	0	0	0	0	0	0	0	0	0	0	0	0	0	0	0	0	0	0	0	0	0	0	0	0	0	0	0	25999000	0	0	0	0
AT3G02780	48376000	0	0	0	0	0	0	0	0	0	0	0	0	0	0	0	0	0	0	0	0	0	0	12708000	6429000	0	0	0	0	0	0	0	0	0	0	32576000	10248000	6685100	10358000	19553000
AT3G02870	0	0	0	0	5594600	0	0	0	0	0	0	0	0	0	0	0	0	0	0	0	0	0	0	3727400	0	0	0	0	0	0	0	0	0	0	0	0	0	0	0	2506300
AT3G02880	6614500	0	0	0	0	0	0	0	0	0	0	0	0	0	0	0	0	0	0	0	0	0	0	7113500	0	0	0	0	0	0	0	0	0	0	0	0	0	0	0	3221500
AT3G03070	753400	0	0	0	10883000	0	0	0	0	0	0	0	7496300	0	0	0	0	0	4478800	0	0	0	0	10857000	0	0	0	0	0	0	0	0	0	0	0	0	0	0	0	4692600
AT3G03250	46540000	0	16916000	0	22277000	19257000	20383000	20490000	0	0	0	17246000	22848000	20201000	0	0	0	18507000	20654000	0	0	0	0	16136000	23864000	0	12371000	0	14465000	52635000	0	0	0	17165000	0	22786000	22092000	30539000	16270000	20776000
AT3G03270	24996000	0	0	0	0	0	0	0	0	0	0	0	0	0	0	0	0	0	12078000	0	0	0	0	23864000	8922100	0	12981000	0	0	0	0	0	0	0	0	11772000	21549000	7121400	27509000	22104000
AT3G03600.1	0	0	0	0	14972000	10749000	0	0	0	0	14713000	9927900	0	0	0	0	21363000	19987000	0	0	0	0	61642000	8984200	0	21414000	0	0	0	0	0	14277000	12342000	0	36205000	0	0	7884800	20300000	50229000
AT3G03640	2045800	0	0	0	0	0	0	0	0	0	0	0	0	0	0	0	0	0	7083400	0	0	0	0	8833500	0	0	0	0	0	0	0	0	6715400	0	0	15014000	0	5596700	8222400	10247000
AT3G03780	233810000	0	47869000	24069000	89186000	50486000	32246000	27262000	37264000	0	0	25517000	40396000	38537000	24535000	0	0	54900000	57594000	0	0	0	46943000	71724000	43160000	50699000	40729000	0	58199000	0	0	0	36221000	27781000	0	50700000	59895000	33368000	50418000	70098000
AT3G03920	39381000	0	0	0	0	0	8938800	0	0	0	0	0	8798500	0	0	0	0	18761000	0	0	0	0	0	12122000	6417600	13548000	23666000	0	64042000	0	0	0	0	7087600	0	11241000	0	5129900	0	16271000
AT3G03960	64150000	0	6558700	0	29401000	5843800	63238000	9841500	0	0	0	24507000	75766000	33393000	10558000	10709000	0	22475000	23715000	0	0	0	0	79562000	22209000	13806000	19913000	0	22444000	73121000	0	0	0	4449400	0	90016000	41809000	23116000	30079000	33109000
AT3G04120	342150000	0	63579000	0	64034000	34371000	61987000	0	0	0	0	0	81564000	57043000	0	0	0	55598000	95034000	0	0	0	27566000	91945000	35044000	0	0	0	77497000	0	0	0	0	126490000	0	169430000	93444000	39305000	189910000	438110000
AT3G04230.1	0	0	0	12429000	16123000	12390000	0	0	0	0	0	11899000	0	0	0	0	10062000	75475000	0	15158000	0	38846000	38511000	39865000	22239000	32673000	0	16619000	0	0	0	0	35814000	27593000	6759000	0	0	0	0	12284000
AT3G04340	0	0	0	0	5524700	0	9497300	0	0	0	0	0	8694700	0	0	0	0	0	0	0	0	0	0	0	0	0	0	0	0	0	0	0	0	0	0	4523000	0	0	0	0
AT3G04400.2;AT3G04400.1;AT2G33370.1;AT1G04480.1	3836300000	155210000	3528800000	52924000	2368600000	77690000	206740000	4121600000	3584600000	1905400000	1687500000	56086000	672130000	3328100000	1563500000	0	1772700000	235220000	4792700000	5021200000	0	3720300000	55904000	2186600000	7457100000	5559700000	0	1198900000	72121000	1253700000	5516300000	4208500000	3694900000	2582200000	63562000	242420000	5124600000	1388400000	1461600000	2281300000
AT3G04600	4412100	0	0	0	3400300	0	0	0	0	0	0	0	4732000	4259100	0	0	0	0	0	0	0	0	0	0	0	0	0	0	0	0	0	0	0	0	0	9138700	4523700	4765600	0	6738500
AT3G04720	91630000	27004000	68643000	24356000	64079000	38994000	118120000	64668000	50148000	47555000	0	71356000	55005000	39904000	0	40679000	0	44811000	53056000	0	0	0	0	32034000	25019000	0	25742000	0	0	0	0	0	0	15329000	0	84074000	110750000	138810000	80765000	77236000
AT3G04790	16195000	0	11040000	0	46325000	47371000	39163000	55773000	36152000	0	0	29703000	29483000	38008000	0	0	0	24146000	6392700	0	0	0	0	6040300	4592300	0	0	0	12797000	0	0	0	0	0	0	11052000	0	4846200	0	6416400
AT3G04830	21634000	0	0	0	0	0	0	0	0	0	0	0	10121000	0	0	0	0	0	0	0	0	0	0	0	0	0	0	0	0	0	0	0	0	0	0	22877000	0	0	0	0
AT3G04840.1	67752000	6738100	24231000	17576000	1028500000	58099000	54847000	67996000	36669000	366220000	710820000	22359000	54433000	26426000	31985000	0	1493500000	132030000	62881000	320030000	0	985690000	101160000	211580000	357250000	488690000	0	424310000	0	0	0	397740000	2120100000	948690000	52131000	12112000	48996000	40334000	556730000	1315500000
AT3G04920.1	189380000	279320000	128240000	182810000	643610000	557690000	240400000	207230000	127460000	367100000	379210000	683800000	149300000	96663000	112100000	0	594020000	1929800000	205840000	479760000	0	1336200000	2237900000	1006900000	649130000	685180000	0	503000000	610080000	291170000	273300000	609780000	116510000	755740000	555000000	87768000	108320000	82060000	383840000	521260000
AT3G05060	20844000	0	0	0	8167700	0	12089000	0	0	0	0	22028000	15651000	27449000	0	37855000	0	31400000	0	0	0	0	0	13452000	12682000	25650000	14411000	0	0	0	0	0	0	8767400	0	24147000	14322000	83269000	50562000	35547000
AT3G05530	62595000	0	0	0	55406000	5493700	42997000	0	0	0	0	10505000	74536000	22864000	0	0	0	15517000	12941000	0	0	0	6676400	49182000	6277700	12096000	5262700	0	12676000	25263000	0	0	6988600	5434300	0	123310000	16537000	7777100	43431000	31670000
AT3G05560.3;AT3G05560.2;AT3G05560.1	463960000	0	449010000	0	251840000	0	0	173930000	0	0	200430000	0	81141000	352850000	167510000	0	270920000	0	0	0	0	88262000	0	565520000	424430000	0	0	100350000	0	118060000	624880000	287570000	519380000	283470000	0	0	841390000	129810000	0	0
AT3G05590.1;AT2G47570.2;AT2G47570.1	372010000	11571000	321570000	3722700	169170000	6347500	12830000	428590000	300100000	142210000	142190000	6842400	36959000	351240000	110830000	0	180330000	13102000	597040000	412520000	3028500000	209290000	65570000	279040000	537960000	669200000	0	57700000	0	0	48247000	358640000	251060000	131130000	8603700	62025000	492970000	165420000	97357000	163700000
AT3G06035	2891600	0	0	0	0	0	0	0	0	0	0	0	0	0	0	0	0	0	7932100	0	0	0	0	5480300	0	0	0	0	0	0	0	0	0	4056700	0	0	3640200	0	0	0
AT3G06050	18188000	0	10013000	0	20906000	6216000	16027000	15962000	10655000	0	0	14342000	19154000	12710000	0	8678100	0	6637300	17795000	0	0	0	13268000	16265000	17525000	0	9931000	0	20047000	0	0	0	7558900	6265900	0	17919000	10282000	24289000	8961500	21112000
AT3G06530	1621800	0	0	0	0	0	0	0	0	0	0	0	12633000	0	0	0	0	0	0	0	0	0	0	0	0	0	0	0	0	0	0	0	0	0	0	15798000	0	0	0	0
AT3G06580	37331000	0	0	0	7727600	0	8671100	0	0	0	0	3861400	0	0	0	0	0	0	4049900	0	0	0	0	8925200	3310000	0	0	0	0	0	0	0	0	5890000	0	45083000	21602000	4189000	15079000	21879000
AT3G06650	0	0	0	0	0	0	0	0	0	0	0	0	5114200	0	0	0	0	3880100	0	0	0	0	0	0	0	0	0	0	0	0	0	0	0	0	0	3515500	0	0	0	0
AT3G06700.3;AT3G06700.2;AT3G06700.1;AT3G06680.3;AT3G06680.2;AT3G06680.1	33581000	0	2365500	0	0	0	0	2235500	42334000	2707200	16045000	0	0	0	0	0	1213800	0	69772000	26616000	0	6273700	0	0	45239000	0	0	0	0	3929600	105460000	576550	3975900	3917100	0	0	6763500	0	0	0
AT3G06720	3058300	0	0	0	0	0	0	0	0	0	0	0	0	0	0	0	0	6510000	5578300	0	0	0	0	6378200	2329300	0	0	0	0	0	0	0	0	0	0	0	0	0	0	5197400
AT3G06810	0	0	0	0	0	0	7528100	0	0	0	0	3093400	0	3470000	0	0	0	0	0	0	0	0	0	0	0	0	0	0	0	0	0	0	0	0	0	0	0	0	0	0
AT3G06850	0	0	0	0	34024000	0	30352000	0	0	0	0	0	24658000	0	0	0	0	0	12950000	0	0	0	0	18341000	0	0	0	0	0	0	0	0	0	18206000	0	27993000	0	0	0	0
AT3G06860	36284000	0	4227300	0	5630100	4975200	0	0	0	0	0	5717800	9695300	0	0	0	0	13570000	9788000	0	0	0	9381400	14050000	0	0	0	0	0	0	0	0	0	0	0	21067000	7782600	12975000	5841600	16704000
AT3G07050	9624400	0	0	0	0	0	0	0	45707000	0	0	10412000	9422100	18065000	60274000	55183000	0	18562000	0	0	0	0	0	0	9924800	52714000	23414000	0	0	0	0	0	23775000	11928000	0	7797400	0	26871000	23012000	15280000
AT3G07100	5632600	0	0	0	3504500	0	0	0	0	0	0	0	3355100	0	0	0	0	0	3873000	0	0	0	0	0	0	0	0	0	0	0	0	0	0	0	0	14255000	0	0	3235900	0
AT3G07110.1;AT3G07110.2	857790000	16275000	702690000	6518300	321170000	0	51093000	500490000	987470000	437820000	212610000	7300400	85619000	623050000	316570000	0	307820000	31906000	1056200000	1009800000	0	443250000	5665900	531400000	1248000000	1540500000	0	138230000	0	102510000	1182900000	785400000	735440000	443880000	7333000	35627000	1371400000	263510000	256830000	289430000
AT3G07590	7568600	0	0	0	0	0	0	0	0	0	0	1621300	0	0	0	0	0	3702800	0	0	2203900	0	0	5678200	941770	0	0	0	0	0	0	0	0	0	0	0	0	0	0	13084000
AT3G07680	13498000	0	0	0	0	0	0	0	0	0	0	0	0	0	0	0	0	0	0	0	0	0	0	10424000	0	0	0	0	0	0	0	0	0	0	0	28214000	0	0	0	14885000
AT3G07720	23208000	0	0	0	0	0	0	0	0	0	0	0	0	0	0	0	0	0	17906000	0	0	0	0	9172100	7687200	0	10161000	0	0	0	0	0	11393000	0	0	20552000	0	0	9723500	14936000
AT3G08030	36585000	0	6634500	0	24079000	6384500	22021000	0	0	0	0	16778000	12926000	0	0	0	0	4218600	10338000	0	0	0	0	24031000	8511900	0	0	0	7385200	0	0	0	9049800	10429000	0	89649000	9845300	6721000	13919000	13445000
AT3G08530	351620000	0	0	0	61866000	36481000	70449000	0	16507000	0	77421000	143720000	87810000	16635000	0	17346000	0	95156000	20812000	0	0	0	10676000	65599000	24382000	45233000	69421000	0	125970000	0	0	0	112490000	181280000	28687000	108130000	9279700	17292000	33517000	150580000
AT3G08580	659520000	0	0	11046000	109070000	47223000	195870000	77908000	20834000	0	56937000	158410000	242120000	65898000	0	0	0	91372000	56854000	0	7900300	0	22639000	163220000	73318000	40916000	47496000	0	48164000	45001000	0	0	50283000	61629000	53981000	837780000	87074000	132360000	162340000	276890000
AT3G08590	0	0	0	0	22337000	12535000	16351000	16489000	0	0	0	0	22102000	17937000	0	14822000	0	15707000	12403000	0	0	0	0	20103000	14901000	10607000	11437000	0	0	0	0	0	0	0	0	14867000	19611000	20435000	16733000	18323000
AT3G08940	0	0	16213000	0	60300000	17713000	82091000	28706000	21808000	0	0	42012000	183260000	71123000	28526000	32950000	0	67105000	0	0	0	0	0	0	0	0	0	0	0	0	0	0	0	0	0	0	0	0	0	0
AT3G09200.1;AT3G09200.2;AT2G40010.1	895420000	154100000	753730000	17655000	464420000	26648000	56762000	1870700000	1222500000	557140000	203000000	42261000	434160000	1412300000	852090000	0	696700000	58447000	733130000	1028100000	0	753040000	35885000	820360000	2410700000	1343600000	0	354860000	82971000	263890000	2236400000	1654900000	1792800000	513130000	34948000	63842000	822800000	543350000	411060000	213140000
AT3G09220	2281800	0	0	0	0	0	0	0	0	0	0	0	0	0	0	0	0	0	5886600	0	0	0	13016000	9624900	0	0	0	0	0	0	0	0	7218200	0	0	8544800	0	5325900	6420600	0
AT3G09260	3178200000	40903000	65710000	46468000	241320000	189900000	141510000	47248000	5257800	0	0	102250000	87460000	39774000	18955000	150940000	0	826940000	4892200000	674500000	1249600000	37648000	824910000	10978000000	3508100000	3874300000	2863100000	356020000	3959100000	706510000	250400000	344660000	1142700000	923950000	816690000	2577500000	1356600000	948490000	1293800000	1346700000
AT3G09270	6636000	0	0	0	0	0	0	0	0	0	0	0	0	0	0	0	0	0	0	0	0	0	0	6167800	5738900	3861200	0	0	0	0	0	0	0	4694800	0	17442000	0	0	4630200	4194600
AT3G09440.2;AT3G09440.1	0	10885000	0	19115000	27370000	32575000	0	32154000	0	34494000	37610000	21895000	23575000	0	26410000	0	36741000	29792000	0	0	0	37954000	30967000	37973000	41732000	27683000	0	0	0	0	0	25416000	28090000	48112000	25653000	17903000	19224000	12546000	23485000	25140000
AT3G09500.1	76878000	0	51964000	0	38357000	0	0	0	60412000	0	0	0	0	40077000	0	0	44930000	0	60641000	69961000	0	0	0	0	72648000	113090000	0	0	0	0	111270000	0	0	0	0	0	55797000	0	0	14181000
AT3G09630.2;AT3G09630.1	2295500000	131520000	1856400000	13044000	1213900000	28226000	121240000	2601000000	2080400000	1044300000	638880000	28742000	415430000	1982200000	995150000	0	1089600000	104590000	2937900000	2727500000	0	1771400000	35703000	1767800000	3632100000	3099700000	0	529380000	99738000	659710000	3583500000	2709700000	2057100000	1301600000	23527000	123090000	2816300000	896890000	717560000	1101400000
AT3G09820.1;AT3G09820.2	0	11384000	0	23547000	26994000	21940000	0	0	0	0	16410000	14659000	28463000	11205000	0	0	19010000	26001000	0	0	0	0	34594000	15253000	18634000	22831000	0	48365000	0	0	0	17580000	22452000	35958000	15351000	19128000	5825800	17110000	37970000	35414000
AT3G09840	426750000	11592000	19757000	0	63278000	30992000	112020000	81707000	26824000	0	0	161170000	111820000	109520000	42629000	44596000	0	125460000	117210000	0	13062000	0	59545000	118320000	64195000	49500000	39842000	0	91912000	46600000	0	0	50530000	100320000	90652000	124530000	80563000	100950000	80082000	216580000
AT3G09940	57947000	0	0	0	6061300	0	9397300	0	0	0	0	0	0	0	0	0	0	0	9362300	0	0	0	0	5997200	0	0	0	0	0	0	0	0	0	0	0	21511000	0	7967300	7322600	11640000
AT3G10410	17836000	0	0	0	0	0	0	0	0	0	0	0	0	0	0	0	0	0	0	0	0	0	0	0	0	0	0	0	0	0	0	0	0	0	0	18733000	0	0	0	6309400
AT3G10610.1	0	0	0	0	0	0	0	0	0	0	0	0	0	0	0	0	9177300	20756000	0	0	0	0	25968000	0	0	0	0	0	0	0	0	0	0	0	7101700	0	0	0	0	0
AT3G10740	0	0	0	0	6171200	0	0	0	0	0	0	0	0	0	0	0	0	0	10840000	0	0	0	0	6913300	0	0	0	0	0	0	0	0	0	0	0	3977500	0	3712600	0	0
AT3G10920	25627000	0	27593000	0	25144000	16981000	28259000	0	0	0	0	15448000	18796000	16245000	0	20335000	0	21798000	35572000	0	11779000	0	31910000	34229000	24532000	20808000	19697000	0	0	0	0	0	13517000	19379000	0	27254000	43198000	29473000	38924000	26687000
AT3G11130	304020000	17537000	0	6647000	55887000	31384000	70758000	11093000	8737200	0	109170000	103750000	76093000	25572000	0	12981000	0	125890000	12203000	0	0	0	7707000	96405000	7271900	42218000	66815000	0	180150000	0	0	0	158130000	152990000	68503000	120620000	9277100	8212200	30696000	297060000
AT3G11250.1	76704000	0	87491000	0	34994000	0	0	71815000	0	46428000	18003000	0	36720000	111510000	0	0	46565000	0	123300000	127460000	0	39706000	0	114300000	0	158260000	0	0	0	0	164690000	150760000	208700000	89310000	6809700	0	157620000	68316000	78090000	39708000
AT3G11400.1;AT3G11400.2	0	0	0	17927000	5017900	0	0	0	0	0	0	21865000	0	0	0	0	0	6370400	0	0	0	0	9654400	0	0	0	0	0	0	0	0	0	0	0	14724000	9700700	0	0	0	0
AT3G11630	18179000	37780000	113040000	54692000	153370000	60364000	73541000	59386000	98634000	26539000	0	80093000	83499000	60566000	243490000	87780000	0	78956000	15660000	0	0	0	27325000	25721000	19007000	0	0	0	138230000	0	0	0	0	0	0	20161000	17961000	13940000	19744000	26324000
AT3G11710	33261000	0	0	0	0	0	7974900	0	0	0	0	5211400	8923100	0	0	0	0	2783500	0	0	0	0	0	8344800	4268400	0	0	0	0	0	0	0	0	0	0	69511000	6908800	13565000	11620000	12830000
AT3G11830	89402000	0	0	0	33866000	0	29371000	0	0	0	0	6697400	49616000	17453000	0	0	0	12702000	17100000	0	0	0	0	46109000	6250800	0	13094000	0	0	38648000	0	0	0	0	0	76057000	17509000	14024000	9479500	35274000
AT3G11930	21026000	0	0	0	11282000	0	0	0	0	0	0	8086100	0	0	0	0	0	0	29039000	0	0	0	0	18070000	42330000	0	0	0	0	0	0	0	0	16187000	0	66246000	18423000	22549000	0	26750000
AT3G11940.2;AT3G11940.1	148020000	0	181610000	255150000	376370000	892500000	335280000	0	125920000	481870000	304700000	324810000	0	0	0	0	393440000	992990000	279040000	927480000	56493000	0	3330800000	315860000	293280000	854670000	0	0	2014200000	0	0	329800000	361210000	487910000	342730000	50325000	0	46295000	349250000	355970000
AT3G11964.1	0	0	0	0	0	0	0	0	0	0	0	2224800	0	0	0	0	0	0	0	0	0	0	0	0	0	0	0	0	0	0	0	0	0	0	34851000	0	0	0	2426800	4028400
AT3G12050	2388500	0	0	0	4917800	0	0	0	0	0	0	0	0	0	0	0	0	0	5272200	0	0	0	0	0	0	0	0	0	0	0	0	0	0	0	0	7748500	0	0	0	5402100
AT3G12290	28055000	0	7744200	0	9571700	5787800	14989000	0	0	0	0	5707300	13424000	0	0	0	0	10579000	9321900	0	0	0	0	10768000	6276500	0	0	0	0	0	0	0	0	4453700	0	7725700	0	6733300	8096900	6283600
AT3G12370.1	0	0	0	0	0	0	0	0	0	0	10254000	0	0	0	0	0	8896400	0	0	0	0	0	0	13113000	0	7794300	0	0	0	0	0	0	0	0	0	0	9966000	0	7174200	7742000
AT3G12490	59164000	0	13955000	0	20386000	14077000	32613000	0	0	0	24520000	14737000	26150000	24883000	0	0	0	20534000	38798000	0	0	0	24741000	38343000	20138000	15232000	18978000	0	24196000	0	0	0	30157000	30870000	21631000	59827000	76180000	47980000	46415000	50954000
AT3G12500	259270000	0	2358200	0	8863000	5051000	6623600	17837000	2894500	0	0	18194000	7805500	0	0	0	0	7367500	102520000	0	20584000	0	81080000	104220000	79056000	65480000	69941000	0	68458000	20524000	0	0	58074000	94600000	52375000	177680000	144990000	220650000	236870000	273240000
AT3G12580.1;AT1G16030.1	0	10781000	0	23763000	7772300	0	0	0	0	0	5491000	5497300	0	0	0	0	0	18200000	0	0	0	20874000	43152000	21802000	19383000	15140000	0	0	0	0	0	0	7441100	0	4380900	0	10479000	0	0	0
AT3G12780.1	94660000	194310000	99350000	331830000	211060000	217210000	116110000	206330000	103800000	157020000	95950000	182510000	177070000	135070000	169210000	0	155930000	20512000	0	0	0	8042300	29491000	21658000	0	13554000	0	28810000	0	0	0	0	6982600	0	5951300	11751000	9846700	10686000	11093000	12869000
AT3G12930	0	8636200	89225000	36953000	0	0	0	113390000	52605000	0	0	0	10691000	117770000	26475000	14961000	0	0	0	0	0	0	0	0	4639800	0	0	0	0	0	0	0	0	0	0	0	7191700	0	0	0
AT3G13120.2;AT3G13120.1	73119000	78788000	70924000	297130000	153380000	435390000	164550000	0	104960000	42471000	115860000	308860000	55035000	0	50557000	0	58461000	36329000	0	0	0	0	79807000	0	0	0	0	0	0	0	0	0	0	0	0	0	0	0	0	0
AT3G13160	16003000	0	0	0	0	0	0	9434100	0	0	0	0	0	8433100	0	0	0	0	0	0	0	0	0	0	9072200	0	0	0	0	0	0	0	0	0	0	9791600	0	5771400	0	0
AT3G13330	4272500	0	0	0	0	0	10486000	0	0	0	0	0	11661000	0	0	0	0	0	0	0	0	0	0	4598900	0	0	0	0	0	0	0	0	0	0	0	24699000	0	0	9033300	10745000
AT3G13580.3;AT3G13580.2;AT3G13580.1	198680000	0	246900000	0	105860000	0	0	89509000	214450000	115150000	44550000	0	29338000	125020000	56983000	0	63964000	12526000	298510000	314620000	0	79481000	0	171630000	261950000	228680000	0	0	0	0	337830000	158290000	141230000	81693000	0	20849000	384810000	53291000	91637000	142860000
AT3G13610	25367000	0	0	0	0	0	0	0	0	0	0	0	0	0	0	0	0	0	0	0	0	0	0	0	0	0	0	0	0	0	0	0	0	4425800	0	78238000	10155000	12909000	3729900	17976000
AT3G13790	975120	0	0	0	4604500	0	7388400	8948100	0	0	0	0	0	0	0	0	0	0	23952000	0	0	0	0	16162000	16702000	21311000	16845000	0	0	0	0	0	13254000	6512600	0	12046000	11991000	18728000	0	8786200
AT3G13860	144880000	0	6751000	0	107780000	0	21318000	16164000	0	0	0	5138400	32952000	0	0	0	0	7819500	65650000	0	0	0	0	43171000	12000000	0	2683800	0	0	55066000	0	0	0	0	0	35404000	26016000	19035000	0	19098000
AT3G13920.1;AT3G13920.4;AT3G13920.3;AT3G13920.2	0	0	0	13282000	0	0	0	0	0	0	8730100	0	0	0	0	0	8508100	0	0	0	0	0	8175500	0	0	0	0	0	0	0	0	0	0	0	16584000	15174000	14115000	0	15457000	0
AT3G13930	423220000	12635000	106700000	29613000	3474700000	31146000	1163500000	51671000	11296000	0	0	61087000	1345300000	124160000	0	9044300	0	37942000	1352100000	10828000	9219000	0	39869000	349520000	72073000	23384000	31805000	0	2318700	575600000	0	0	27166000	51985000	0	183970000	101580000	103670000	66215000	86681000
AT3G14067	2822000	0	11892000	0	18248000	0	16432000	0	11742000	0	0	0	7660300	13680000	0	0	0	0	11557000	0	0	0	0	9989300	7446000	6717200	0	0	15818000	0	0	0	6172400	0	0	8766300	12363000	0	0	6909500
AT3G14210	0	68306000	88858000	0	213980000	278220000	140350000	186270000	76923000	25579000	103580000	225860000	729350000	860320000	370090000	503710000	0	2479400000	0	0	0	0	0	0	0	0	0	0	0	0	0	0	0	0	0	0	0	0	0	0
AT3G14290	21364000	0	0	0	9148800	0	0	0	0	0	0	3215000	0	0	0	0	0	0	0	0	0	0	0	9757000	0	0	0	0	0	0	0	0	0	0	0	0	0	6704400	0	9615100
AT3G14310	29035000	0	0	0	68405000	32485000	57579000	60477000	0	0	0	56004000	24001000	27962000	0	0	0	25599000	60265000	0	25082000	0	0	27856000	41011000	0	37849000	0	0	0	0	0	18624000	28024000	0	24118000	43175000	49516000	22560000	30145000
AT3G14415	1911900	5780500	0	0	49045000	30569000	60731000	30864000	10842000	0	18813000	36312000	46575000	36889000	0	0	0	33034000	3222100	0	0	0	0	3732600	1685000	0	0	0	0	0	0	0	0	0	0	4318500	0	0	0	0
AT3G14420	0	0	0	7569200	35709000	28385000	41469000	49220000	23234000	0	55891000	46860000	32166000	31784000	16823000	14903000	0	31424000	0	0	0	0	0	0	0	0	0	0	0	0	0	0	0	0	0	0	0	0	0	0
AT3G14600.1	51766000	0	43794000	0	28637000	0	0	65321000	87078000	0	22929000	0	0	26194000	30828000	0	27658000	0	136980000	108160000	0	74046000	0	37925000	233800000	117210000	0	27607000	0	0	99702000	97951000	87868000	52039000	0	0	94131000	21960000	13980000	23547000
AT3G14940	229840000	1412300	0	0	4008800	0	0	0	0	0	0	0	0	0	0	0	0	0	5598400	0	0	0	0	20399000	8791000	1085900	12569000	0	0	0	0	0	6471300	9449700	0	389220000	22001000	29608000	68906000	137470000
AT3G14990	226290000	0	12709000	0	72302000	21632000	72344000	90513000	0	0	0	58103000	43564000	36342000	0	19383000	0	41672000	159980000	29612000	66235000	0	239360000	308770000	135730000	103620000	183880000	0	150160000	39361000	0	55902000	80669000	88437000	110580000	163180000	151130000	128720000	153450000	227680000
AT3G15000	15101000	0	0	0	6836400	0	0	0	0	0	0	0	0	0	0	0	0	12342000	6970300	0	0	0	0	7425400	6928800	0	0	0	0	0	0	0	0	0	0	0	0	0	0	0
AT3G15190.1	142000000	329320000	86166000	1099200000	306600000	729340000	208060000	57315000	122400000	123290000	324610000	577460000	190450000	23598000	130940000	0	145550000	70027000	0	0	0	0	65617000	12325000	0	0	0	0	0	0	0	0	15279000	0	20514000	0	5620400	0	0	0
AT3G15356	0	0	22636000	7219400	22988000	28570000	88328000	66710000	64291000	69698000	35018000	84305000	32578000	22439000	26145000	28585000	0	37302000	0	0	0	0	0	0	0	0	0	0	0	0	0	0	0	0	0	0	0	0	0	0
AT3G15640	8078200	0	4715200	0	0	2745300	3953400	0	0	0	0	0	0	0	0	0	0	0	14253000	0	0	0	0	7892300	0	0	2077500	0	0	0	0	0	0	0	0	6218500	0	13837000	0	4326600
AT3G15730	325820000	0	27399000	23936000	98511000	64358000	135900000	90677000	15468000	31158000	66194000	144100000	70684000	33567000	0	49167000	0	119240000	168990000	0	66370000	0	175370000	292870000	237650000	94882000	120350000	0	93058000	23508000	0	25780000	76782000	68387000	0	131500000	161600000	165430000	147550000	144090000
AT3G15950	92422000	0	0	0	17855000	8239500	0	0	0	0	0	16376000	0	0	0	0	0	0	145770000	0	17587000	0	24350000	79691000	116900000	30511000	46966000	0	42563000	0	0	0	48900000	68817000	0	72936000	57034000	87753000	52542000	41181000
AT3G16400	96953000	22365000	36506000	9161800	47827000	29051000	34878000	27971000	12678000	0	0	32863000	25667000	13420000	11414000	21124000	0	15569000	143010000	9401300	59006000	0	69828000	156090000	92052000	60706000	71872000	0	85715000	0	0	0	70755000	65830000	47997000	88806000	63413000	77191000	65906000	101550000
AT3G16420	554880000	13387000	98719000	26285000	121930000	108950000	44871000	18399000	0	0	0	61792000	63409000	84812000	58609000	139690000	0	327950000	805110000	145170000	324380000	0	439930000	1215700000	818480000	577230000	686870000	0	649000000	57644000	0	0	229840000	197860000	138860000	273340000	523380000	332580000	417640000	305060000
AT3G16450	223450000	0	0	0	11720000	2731400	3682900	0	0	0	0	0	0	0	0	0	0	37758000	533230000	87146000	91351000	0	102530000	1041200000	307850000	317220000	286860000	0	642690000	0	0	0	87328000	67472000	37111000	179440000	54614000	56531000	77954000	112640000
AT3G16460	665270000	0	0	0	27862000	12053000	28164000	0	0	0	0	0	4878000	0	0	0	0	57849000	476260000	55508000	127640000	0	171260000	1569800000	564530000	540200000	465450000	37781000	1222900000	416430000	58566000	160330000	222870000	259010000	115910000	513590000	134050000	89548000	146330000	272630000
AT3G16470	63548000	0	81847000	13274000	111620000	62223000	69176000	52464000	18240000	0	0	86496000	46246000	30091000	0	42021000	0	125220000	168120000	0	0	0	52340000	523860000	234020000	132390000	165260000	0	389510000	147990000	0	0	97471000	57793000	0	81097000	46149000	12838000	47204000	50179000
AT3G16530	0	10452000	28443000	0	32509000	25482000	59210000	11863000	23626000	0	0	88757000	25205000	0	0	22827000	0	19484000	0	0	0	0	0	0	0	0	0	0	0	0	0	0	0	0	0	0	0	0	0	0
AT3G16640	28454000	0	28840000	0	48232000	0	48610000	0	29057000	0	54661000	31416000	52475000	64461000	38545000	41687000	0	28369000	32773000	0	0	0	20568000	62578000	52416000	26025000	13836000	0	52749000	0	0	0	25572000	22007000	0	64895000	69969000	111640000	31054000	34713000
AT3G16780.1	126780000	0	88423000	0	51462000	0	0	105580000	0	63129000	0	0	22522000	65282000	0	0	53163000	0	155600000	115580000	0	84759000	0	70019000	255230000	197900000	0	0	0	0	286700000	153700000	116220000	72819000	0	0	122090000	46283000	40554000	54167000
AT3G16950	18231000	5959100	126830000	6548800	216010000	0	103030000	57662000	0	0	0	0	134940000	40653000	0	7047600	0	4258200	461820000	17071000	18567000	0	12432000	551730000	205930000	132340000	50675000	0	46316000	244680000	0	25197000	38849000	16101000	0	73493000	194050000	120780000	101400000	58392000
AT3G17020	54363000	0	0	0	13911000	7334000	21156000	14696000	0	0	0	17346000	13049000	14493000	0	0	0	7664600	25531000	0	0	0	9740400	19971000	11544000	6248900	12115000	0	20491000	0	0	0	13192000	6461200	0	50596000	29550000	23332000	0	25942000
AT3G17210	14177000	0	14805000	0	22693000	6695300	13984000	17824000	7281000	0	0	12237000	16228000	19787000	0	0	0	15128000	39285000	0	0	0	0	38400000	17256000	11070000	8870600	0	0	0	0	0	9833400	13127000	0	12848000	16083000	19487000	16490000	17504000
AT3G17240	31733000	0	15827000	0	20272000	0	23168000	17864000	22574000	0	0	0	19349000	27396000	0	20138000	0	12782000	28655000	0	13977000	0	24344000	23325000	17024000	15207000	17638000	0	0	40971000	0	0	31174000	23865000	0	23187000	25650000	25052000	37553000	34102000
AT3G17390	113330000	0	45325000	0	80610000	43734000	54204000	70047000	30209000	0	0	62992000	67312000	54389000	0	37229000	0	34305000	53468000	0	0	0	23806000	51506000	58978000	22997000	36204000	0	72047000	0	0	0	43342000	43794000	0	202220000	52285000	70938000	54597000	89432000
AT3G17465.1	20527000	63234000	59614000	0	21186000	0	60875000	45245000	0	0	20832000	7284800	128800000	28131000	22149000	0	25002000	15289000	23939000	24385000	0	44772000	5740000	188850000	45436000	25697000	0	40150000	0	0	51713000	42186000	29247000	48455000	11450000	153400000	199670000	50123000	41626000	47344000
AT3G17810	16848000	0	0	0	6759200	0	17067000	0	0	0	0	10202000	0	0	0	0	0	6320900	0	0	0	0	11768000	12408000	7960800	0	0	0	17872000	0	0	0	0	0	0	0	0	11223000	0	10531000
AT3G17820	222580000	0	6130600	0	16765000	8501600	13827000	12197000	0	0	0	13879000	23210000	0	0	0	0	27861000	64504000	6421000	18659000	0	33122000	67380000	16528000	17098000	23669000	0	0	0	0	0	20109000	20743000	0	27808000	36897000	39735000	50863000	68767000
AT3G17940	12153000	0	6993600	0	4179200	0	6773700	0	0	0	0	0	8114200	0	0	0	0	0	10420000	0	0	0	0	10814000	0	0	7636600	0	0	0	0	0	0	0	0	8241100	6466400	3795300	0	0
AT3G18000	0	0	0	0	5492600	0	0	0	0	0	0	0	0	0	0	0	0	0	4439500	0	0	0	0	0	0	0	0	0	0	0	0	0	0	0	0	19293000	11391000	9485100	7248600	6470900
AT3G18060	1477800	0	0	0	0	0	8555600	0	0	0	0	7457000	0	0	0	0	0	0	7364500	0	0	0	0	5841700	5612700	0	0	0	0	0	0	0	0	0	0	0	0	5622300	0	0
AT3G18080	904230	16232000	34259000	17976000	63257000	25832000	27297000	29544000	20258000	0	0	31247000	30174000	27655000	19773000	33400000	0	17856000	0	0	0	0	0	0	3633900	0	0	0	0	0	0	0	0	4875900	0	0	0	2485400	0	0
AT3G18130.1	0	0	0	29799000	32743000	50817000	47285000	0	0	0	56527000	37492000	0	0	0	0	61364000	100430000	0	0	0	46509000	82905000	48497000	0	45408000	0	0	96559000	0	0	33328000	73906000	37628000	26656000	23769000	27670000	0	32448000	32726000
AT3G18190	39003000	0	0	0	27385000	2397100	61365000	24142000	0	0	0	13146000	74024000	27367000	8738600	10238000	0	19038000	27145000	0	0	0	0	42658000	25043000	0	8736700	0	0	0	0	0	7073600	6814800	0	82885000	27813000	32267000	22997000	17316000
AT3G18240	145760000	0	0	0	0	16961000	15404000	0	0	0	0	46587000	17346000	0	0	0	0	21847000	63770000	0	0	0	32381000	74588000	15294000	0	21395000	0	0	0	0	0	15718000	0	0	51348000	8651200	11690000	0	27832000
AT3G18740.1;AT1G36240.1	516700000	0	712260000	7027300	356140000	13012000	20558000	632960000	183590000	46252000	173630000	0	38228000	487610000	271670000	0	239530000	28517000	740900000	595190000	0	310700000	15212000	358900000	1167400000	948350000	0	61065000	0	0	233750000	577800000	423270000	254650000	6599600	0	827470000	152350000	189400000	297330000
AT3G18760.1;AT3G18760.2	0	2277600	0	0	9308000	6815400	0	0	0	0	0	0	0	0	0	0	4811100	32771000	0	0	0	4504500	48586000	0	2719400	0	0	0	0	0	0	9138100	0	0	52228000	0	0	4187100	6140100	7414400
AT3G18780	224700000	15276000	0	0	53360000	37558000	112360000	54975000	42656000	0	40278000	39181000	41681000	24141000	0	0	0	38802000	52069000	0	0	0	24748000	128270000	36555000	42719000	43535000	0	72277000	114560000	0	0	39737000	91833000	52425000	341360000	78029000	53291000	83997000	94162000
AT3G19170	3051300	0	11210000	0	13213000	8536600	13300000	0	0	0	0	20681000	11623000	12361000	0	0	0	9004000	4813200	0	0	0	0	5265200	0	0	0	0	0	0	0	0	0	0	0	8077600	7614700	6891900	0	5680900
AT3G19390	12480000	0	0	0	0	0	0	0	0	0	0	0	0	0	0	0	0	0	0	0	0	0	0	0	0	0	0	0	0	0	0	0	0	0	0	9007200	0	8783300	0	7946900
AT3G19450	14600000	0	13319000	0	11040000	11560000	11795000	0	12812000	0	0	13314000	0	13443000	0	0	0	0	25676000	0	0	0	0	16554000	17695000	0	17383000	0	26269000	0	0	0	13069000	12700000	15229000	15279000	20143000	26953000	0	13563000
AT3G19710	3575800	0	0	0	7430500	6104700	0	0	0	0	0	0	4366500	0	0	0	0	0	5999200	0	0	0	0	4859600	4473700	0	0	0	0	0	0	0	0	0	0	8109500	0	0	0	0
AT3G19820	103630000	0	0	0	13284000	3777800	11156000	0	0	0	0	6397900	5987100	0	0	0	0	0	20597000	0	0	0	0	32925000	10081000	10354000	5147100	0	0	0	0	0	14636000	11344000	0	253620000	8401700	10286000	33812000	37282000
AT3G20000	38353000	0	0	0	10650000	3731200	16270000	0	0	0	0	0	19863000	7379300	0	0	0	8241500	7268500	0	0	0	6661700	11410000	0	0	0	0	0	0	0	0	0	6342600	0	64184000	21298000	12228000	28564000	27433000
AT3G20050	46112000	0	0	0	28827000	0	22220000	0	0	0	0	5488600	58821000	24446000	0	0	0	13833000	4462900	0	0	0	0	31643000	12988000	0	4038600	0	0	29267000	0	0	0	0	0	141580000	22373000	20837000	6262500	27082000
AT3G20370	9139900	0	0	0	0	0	7604500	0	0	0	0	0	0	0	0	0	0	0	40146000	11069000	0	0	48214000	133380000	37474000	70638000	63056000	0	98175000	37981000	42940000	0	30925000	21058000	0	50175000	31621000	16034000	48485000	16742000
AT3G20390	0	0	30886000	14415000	36026000	13714000	28221000	26784000	20529000	0	0	8415300	17377000	32297000	17000000	24005000	0	0	22312000	0	0	0	0	44765000	21896000	19595000	23887000	0	27497000	0	0	0	0	6124700	0	28075000	32212000	20912000	29234000	39729000
AT3G20820	0	0	0	0	11491000	0	11774000	0	0	0	0	9087000	10473000	0	0	0	0	6834700	0	0	0	0	0	0	0	0	0	0	0	0	0	0	0	0	0	0	0	0	0	0
AT3G21140	1418300	0	0	0	0	0	16051000	0	0	0	0	0	18624000	0	0	0	0	0	0	0	0	0	0	13495000	0	0	0	0	0	0	0	0	0	0	0	29197000	0	0	0	0
AT3G21720	6502200	0	0	0	0	0	0	0	0	0	0	0	0	0	0	0	0	0	0	0	0	0	0	0	0	0	0	0	0	0	0	0	0	0	0	0	0	0	7372100	8245500
AT3G21770	63653000	0	0	0	0	0	0	0	0	0	0	0	0	0	0	0	0	0	18443000	0	0	0	6756600	24983000	16822000	0	7661500	0	0	0	0	0	10550000	14898000	0	111730000	0	10386000	0	19655000
AT3G22110	53820000	0	0	0	33093000	0	25246000	0	0	0	0	18702000	22881000	25254000	0	0	0	34580000	49562000	0	20182000	0	0	41493000	19281000	0	0	0	0	0	0	0	0	0	0	21145000	55307000	33372000	0	40951000
AT3G22200	140690000	0	28223000	0	67475000	36085000	51885000	24898000	0	0	0	49198000	21036000	30458000	0	17042000	0	43332000	41997000	0	0	0	26862000	61877000	29432000	18902000	31715000	0	26695000	0	0	0	23023000	17419000	0	49176000	44671000	52122000	65926000	52622000
AT3G22230.1;AT2G32220.1	548720000	0	407380000	0	111590000	0	35804000	400460000	457820000	335280000	123950000	0	78395000	302530000	139130000	0	76654000	14937000	462440000	538310000	0	218200000	0	229320000	364390000	576200000	0	89464000	0	123560000	939300000	336710000	344050000	237700000	0	49172000	254910000	126670000	111980000	195770000
AT3G22630	12490000	0	0	0	8590700	0	7921500	0	0	0	0	0	8499800	0	0	0	0	9859500	21041000	0	0	0	0	7653200	0	0	0	0	0	0	0	0	0	0	0	0	8994900	12866000	0	0
AT3G22660	0	0	0	0	0	0	0	0	0	0	0	0	0	0	0	0	0	0	0	0	0	0	0	0	11971000	14830000	4992800	0	0	0	0	0	0	0	0	0	0	15296000	0	0
AT3G22890	4757100	0	24601000	0	17038000	20515000	22513000	11891000	12201000	0	0	17528000	18220000	14699000	0	15619000	0	23882000	5372700	0	0	0	0	7880600	0	0	0	0	0	0	0	0	0	0	0	0	0	0	0	6314000
AT3G22960	29964000	0	0	0	11512000	4606800	8372400	0	0	0	0	6563400	0	6200800	0	0	0	9024000	6453600	0	0	0	0	9006100	0	0	0	0	0	0	0	0	0	0	0	50975000	6780800	7178800	18477000	15426000
AT3G23400	0	0	19864000	0	27179000	19934000	23694000	28211000	18070000	0	0	20685000	19724000	14244000	0	0	0	16584000	0	0	0	0	0	0	13182000	0	0	0	0	0	0	0	0	0	0	0	0	0	0	0
AT3G23490	37227000	0	0	0	11215000	11181000	0	12233000	0	0	0	15703000	0	0	0	0	0	12966000	5600200	0	0	0	0	10186000	10797000	0	12671000	0	0	0	0	0	0	0	0	0	9545200	15122000	0	13224000
AT3G23600	7541400	0	0	0	10021000	0	0	0	0	0	0	0	0	0	0	0	0	0	6901600	0	0	0	0	7309900	0	0	0	0	0	0	0	0	0	0	0	0	0	9785000	0	0
AT3G23620.1	11513000	0	13127000	0	0	0	0	70034000	75414000	0	14026000	6571700	55933000	192500000	188390000	0	30704000	0	0	15433000	0	0	0	74480000	142670000	77086000	0	27322000	0	0	103540000	60095000	24410000	0	29718000	123640000	312380000	119320000	46418000	9124900
AT3G23810	25709000	0	0	0	8566300	5938100	9360500	0	0	0	0	0	0	0	0	0	0	11362000	0	0	0	0	0	7366400	0	0	6074400	0	15927000	0	0	0	0	7950700	0	0	0	0	0	9266400
AT3G23940	25976000	0	13368000	0	17603000	14436000	18073000	15843000	0	0	0	12935000	12223000	22071000	17957000	18092000	0	13950000	18329000	0	0	0	0	17887000	10782000	0	7106000	0	0	0	0	0	0	9726200	0	10548000	21378000	23283000	0	15325000
AT3G23990	81840000	16299000	72491000	0	416550000	20013000	104430000	44164000	0	0	0	39666000	127870000	104540000	37597000	51068000	0	74750000	266990000	0	46881000	0	113180000	161120000	110810000	19995000	47085000	0	65822000	0	0	0	18739000	12631000	0	131780000	150520000	126840000	64005000	77617000
AT3G24170	126220000	19125000	52782000	30720000	56403000	25400000	48020000	58887000	42578000	0	0	56070000	39944000	52255000	0	58811000	0	38607000	44105000	0	26543000	0	56316000	61054000	63329000	35447000	40141000	0	75751000	30293000	0	0	58012000	18298000	45871000	61452000	104350000	106990000	92605000	117370000
AT3G24503	165960000	6278300	12048000	20069000	39142000	39282000	48475000	39174000	32351000	46182000	0	34893000	32057000	35618000	15035000	22467000	0	32323000	86064000	11339000	23952000	0	71911000	67579000	26715000	21565000	31612000	0	53257000	77416000	0	0	30080000	33496000	30295000	49258000	44160000	44058000	53648000	86633000
AT3G24830.1	814790000	31945000	563080000	0	355130000	11914000	44072000	652650000	408500000	384230000	256360000	0	95636000	670760000	345270000	0	363240000	31686000	1049400000	849830000	0	555660000	0	471900000	1527200000	1185000000	0	195830000	0	182270000	1146200000	813150000	749270000	360570000	0	60692000	1102000000	324990000	206640000	394690000
AT3G25520.1;AT3G25520.2	454270000	0	527970000	0	307400000	0	0	405310000	480900000	235250000	259080000	0	118710000	367980000	174940000	0	318240000	27058000	777490000	612190000	0	309830000	13979000	539990000	691460000	755780000	0	102420000	0	119650000	700440000	417240000	529850000	217930000	6558500	121770000	1606500000	184750000	191700000	320190000
AT3G25530	23989000	0	10085000	0	14455000	6270400	15227000	0	0	0	0	7760900	7320000	0	0	0	0	14148000	8318000	0	0	0	0	8696800	6985000	0	0	0	0	0	0	0	0	0	0	8801500	0	7382600	0	12912000
AT3G25780	2529300	0	0	0	3568400	0	3650900	0	0	0	0	0	0	0	0	0	0	0	9113800	0	0	0	0	7750400	5596400	0	0	0	0	0	0	0	0	4958800	0	6029800	4581200	5689400	0	0
AT3G25800	21858000	0	0	0	4039400	0	0	0	0	0	0	3255600	0	0	0	0	0	0	0	0	0	0	0	4301000	2973800	0	0	0	0	0	0	0	0	0	0	28873000	4270300	3447200	5316600	4969100
AT3G25860	109080000	62689000	1011000000	251900000	1455200000	52045000	1545700000	762490000	110120000	25305000	0	54403000	1574100000	517610000	79598000	65175000	0	70028000	1244200000	57732000	53557000	30573000	37694000	1154600000	904910000	419600000	233670000	0	25919000	1178900000	378050000	178290000	144160000	97969000	48289000	224050000	88321000	65497000	89956000	92085000
AT3G25920.1	420760000	2710700000	2059300000	27123000	396350000	25319000	2863200000	648870000	333970000	275190000	289090000	43622000	2929700000	226060000	163810000	0	279040000	16611000	0	3029400	0	0	0	227160000	5781500	20161000	0	0	0	43495000	0	0	2668100	0	0	144410000	58082000	0	3288600	10940000
AT3G26060	0	0	0	0	13066000	7830200	0	0	0	0	0	4576600	0	0	0	0	0	4065200	0	0	0	0	0	0	0	0	0	0	0	0	0	0	0	0	0	0	0	0	0	0
AT3G26360	22997000	0	0	0	0	0	0	0	0	0	0	0	0	0	0	0	0	0	13441000	0	0	0	0	6508400	0	0	0	0	0	0	0	0	0	0	0	0	0	0	0	0
AT3G26450	3253200	0	8943800	7392200	38676000	17764000	15940000	9871900	0	0	0	14879000	15789000	15131000	0	0	0	9057000	6853900	0	0	0	0	7005800	0	0	0	0	0	0	0	0	0	0	0	0	0	5125300	0	0
AT3G26520	0	0	0	0	153080000	30749000	16540000	0	0	0	0	40496000	12344000	30901000	0	0	0	0	234130000	0	0	0	22267000	48600000	99796000	31547000	0	0	32974000	0	0	0	0	68131000	42736000	7383100	26013000	38780000	0	14994000
AT3G26650	1150700	0	44583000	34217000	98591000	75433000	130510000	112480000	0	24711000	80653000	75149000	112500000	85846000	24631000	25442000	0	73966000	0	0	0	0	0	6295300	6445800	0	4043200	0	0	0	0	0	0	0	0	6676400	0	0	0	0
AT3G26720	8648700	0	0	0	5713900	0	0	0	0	0	0	0	0	0	0	0	0	0	0	0	0	0	0	6397800	4923400	0	0	0	0	0	0	0	0	0	0	0	0	8078800	0	4106500
AT3G26830	8283000	0	0	0	0	0	21572000	0	0	0	0	0	10586000	0	0	0	0	6762300	0	0	0	0	0	0	0	0	0	0	0	0	0	0	0	0	0	7092400	0	0	0	0
AT3G27190	4433200	0	0	0	0	0	0	0	0	0	0	0	0	0	0	0	0	0	0	0	0	0	0	0	0	0	0	0	0	0	0	0	0	0	0	16736000	0	3781400	0	0
AT3G27240	12018000	0	0	0	6878500	0	7887900	0	0	0	0	0	0	0	0	0	0	3852100	0	0	0	0	0	10462000	7989200	0	0	0	0	0	0	0	0	0	0	15203000	0	10567000	0	19459000
AT3G27280	74605000	0	0	0	21637000	0	48712000	25773000	0	0	0	0	78763000	49812000	0	0	0	14684000	18588000	0	0	0	0	119330000	8760900	0	5581600	0	0	62322000	0	0	0	7880000	0	40763000	0	4754900	29611000	41429000
AT3G27300	9670500	0	0	0	0	0	0	0	0	0	0	0	0	0	0	0	0	0	0	0	0	0	0	4749200	0	0	0	0	0	0	0	0	0	0	0	0	0	0	0	3013200
AT3G27380	19286000	0	0	0	4073800	0	0	0	0	0	0	0	5433100	0	0	0	0	5658400	12011000	0	0	0	8150400	14027000	0	6439200	8836100	0	15787000	0	0	0	5803900	7339400	0	8382800	3809500	0	7099800	7027000
AT3G27430	10999000	0	0	0	13353000	0	10725000	0	0	0	0	0	11560000	13055000	0	0	0	0	31499000	0	0	0	0	12297000	9661400	0	0	0	0	0	0	0	0	0	0	11099000	0	27128000	0	0
AT3G27740	5624400	0	0	0	8138000	0	7674600	0	0	0	0	0	0	6803400	0	0	0	7529200	0	0	0	0	0	0	0	0	0	0	0	0	0	0	0	0	0	15941000	0	6666700	0	8418600
AT3G27850.1;AT3G27830.1	2186200000	15347000000	8920300000	261740000	2049900000	210490000	12735000000	3250100000	1399000000	1420100000	1830800000	367420000	9475000000	1712300000	1464700000	0	1057000000	142920000	42977000	84406000	0	95705000	14056000	1338100000	134830000	183320000	78248000	54368000	116070000	761820000	93984000	98960000	60980000	80839000	13604000	669900000	393310000	54947000	38757000	97422000
AT3G27890	36111000	0	0	0	0	8228700	14667000	0	0	0	0	10298000	17819000	19215000	0	0	0	17305000	2166800	0	0	0	0	11783000	7492100	0	14360000	0	0	0	0	0	0	7294300	0	17013000	5802000	14400000	12428000	9873000
AT3G28500.1	62711000	0	62193000	0	36889000	0	0	89067000	52576000	0	24072000	0	35707000	136470000	64869000	0	51447000	0	0	20032000	0	0	0	19985000	48089000	48188000	0	0	0	0	0	0	39114000	0	0	0	103360000	33460000	25519000	42624000
AT3G28710	0	0	0	0	37999000	0	9755900	0	0	0	0	0	11845000	0	0	0	0	0	0	0	0	0	0	0	0	0	0	0	0	0	0	0	0	0	0	7373000	0	0	0	0
AT3G28715	0	0	0	0	28457000	0	0	0	0	0	0	0	16945000	0	0	0	0	0	0	0	0	0	0	17235000	7780400	0	0	0	0	0	0	0	0	14561000	0	0	0	0	0	0
AT3G28900.1	53355000	0	65188000	0	0	0	0	80255000	110290000	0	39897000	0	0	0	0	0	21569000	0	140390000	167630000	0	67112000	0	59759000	120660000	101370000	0	0	0	0	0	207750000	100680000	0	0	0	52144000	20792000	22516000	26080000
AT3G28940	1289800	0	0	0	13369000	0	11373000	14364000	17727000	0	0	0	7723500	0	0	0	0	0	5473700	0	0	0	0	8262400	0	0	0	0	0	0	0	0	0	0	0	5627800	0	6115200	11734000	6868600
AT3G29320	0	0	0	0	12067000	0	13231000	12772000	12610000	0	0	8040800	13277000	13286000	0	0	0	11099000	5167400	0	0	0	0	0	0	0	0	0	0	0	0	0	0	0	0	0	0	5999100	0	6651500
AT3G29360	27911000	0	0	0	0	0	9905700	0	0	0	0	6097600	11271000	10282000	0	0	0	9894100	0	0	0	0	0	8975700	0	0	0	0	0	0	0	0	0	4868700	0	32405000	7066300	0	9411300	16816000
AT3G32980	1295700000	0	13255000	0	32501000	15325000	0	0	0	0	0	4776400	12845000	10021000	0	0	0	13583000	557630000	170510000	321500000	43152000	588970000	913080000	584080000	159750000	252960000	0	569620000	85915000	0	55030000	387640000	208270000	347190000	757160000	675950000	810320000	773810000	788880000
AT3G42050	54185000	0	10140000	0	76575000	2748500	64171000	0	0	0	0	20841000	123140000	37677000	0	0	0	29483000	26029000	0	0	0	16314000	80296000	21150000	9871200	13432000	0	15550000	0	0	0	7925300	21415000	0	104540000	12721000	20866000	8715200	15352000
AT3G43190	329820000	0	0	0	0	0	0	0	0	0	0	0	0	0	0	0	0	0	284210000	0	33930000	0	177970000	192230000	181640000	77607000	129120000	0	40909000	0	0	37588000	83953000	117940000	59120000	272550000	267510000	236290000	132300000	241400000
AT3G43300	2998900	0	0	0	0	0	6362700	0	0	0	0	0	0	0	0	0	0	0	0	0	0	0	0	4995500	0	0	0	0	0	0	0	0	0	0	0	11809000	0	0	0	0
AT3G44110	3827100	0	0	0	12463000	0	0	0	0	0	0	0	0	0	0	0	0	7733200	0	0	0	0	0	15182000	0	0	0	0	0	0	0	0	0	0	0	14578000	0	0	0	7270400
AT3G44300	127730000	11152000	103040000	17926000	276270000	32857000	1295700000	260690000	59493000	49528000	35129000	88865000	877000000	204730000	65158000	126200000	0	142860000	221260000	0	15507000	0	11507000	569000000	115870000	61306000	23555000	0	0	76440000	0	0	30086000	35730000	14341000	336280000	231960000	94081000	81316000	61800000
AT3G44310	39363000	37702000	350040000	81843000	832140000	190990000	1524800000	287410000	178230000	0	53424000	127390000	2372300000	440520000	147590000	380300000	0	269820000	76695000	0	24962000	503890000	16826000	1089200000	164540000	183780000	35168000	0	35898000	0	0	0	88349000	0	0	196820000	80424000	34221000	154560000	50523000
AT3G44320	17106000	0	0	37339000	72542000	0	154370000	57159000	0	0	0	33239000	141640000	108510000	0	0	0	56170000	56355000	0	0	0	0	149870000	43138000	0	9831100	0	0	0	0	0	0	0	0	73351000	35571000	40650000	19857000	47265000
AT3G44330	6171600	0	0	0	0	0	0	0	0	0	0	0	0	0	0	0	0	0	0	0	0	0	0	0	0	0	0	0	0	0	0	0	0	5079300	0	6326000	0	0	0	4069700
AT3G44590.2;AT3G44590.1	0	0	0	0	0	0	0	38397000	0	0	0	0	0	0	0	0	18932000	0	94397000	119110000	0	45367000	0	60815000	74020000	54557000	0	0	0	0	187160000	141940000	187430000	64019000	0	0	95409000	0	19155000	30306000
AT3G44860	0	0	0	0	0	0	3874700	0	0	0	0	3396400	5343500	0	0	0	0	0	0	0	0	0	0	0	0	0	0	0	0	0	0	0	0	0	0	0	0	0	0	0
AT3G44890.1	723950000	5179800000	3919400000	54978000	726720000	36599000	3279300000	1305000000	330470000	321200000	504540000	42709000	3193500000	415160000	468190000	0	485420000	36060000	13610000	20181000	0	22335000	782930	321710000	44200000	33417000	0	17912000	0	22988000	0	27688000	12069000	20269000	389030	128780000	59846000	9853400	8497800	22544000
AT3G45140	97357000	31369000	114950000	69825000	492010000	246990000	616970000	291380000	159960000	58792000	197720000	361530000	277190000	162230000	108550000	85434000	0	199790000	0	0	0	0	0	0	0	0	0	0	0	0	0	0	0	0	34877000	16437000	0	0	0	0
AT3G45300	10906000	0	0	0	4123900	0	0	0	0	0	0	0	0	0	0	0	0	0	0	0	0	0	0	0	0	0	0	0	0	0	0	0	0	0	0	5578000	0	0	0	5845900
AT3G46040.1	0	0	0	0	0	0	0	0	0	0	41840000	0	0	0	0	0	60823000	136910000	0	0	0	0	0	65395000	0	38548000	0	0	0	0	0	0	0	0	0	0	0	0	0	0
AT3G46560	7449800	0	0	0	0	5940400	0	0	0	0	0	0	6515100	0	0	0	0	0	10165000	0	0	0	13159000	0	6472300	0	7741700	0	0	0	0	0	0	0	0	11860000	6398200	8298600	0	7733300
AT3G46740	5832000	0	0	0	5547100	0	5533500	0	0	0	0	4369400	6139700	0	0	0	0	0	0	0	0	0	0	0	0	0	0	0	0	0	0	0	0	0	0	11565000	0	0	0	4515600
AT3G46780	0	0	0	0	7430300	0	6959700	0	0	0	0	0	8435200	0	0	0	0	0	0	0	0	0	0	0	0	0	0	0	0	0	0	0	0	0	0	0	0	0	0	0
AT3G46970	0	0	0	0	12880000	9204200	13375000	12586000	0	0	0	14343000	0	8200200	0	0	0	0	0	0	0	0	0	0	0	0	0	0	0	0	0	0	0	0	0	0	0	0	0	0
AT3G47470	0	0	0	31773000	31594000	19073000	20975000	0	17787000	0	0	5407800	49465000	23547000	0	0	0	25567000	0	0	0	0	0	0	0	0	0	0	0	0	0	0	0	0	0	0	0	0	0	0
AT3G47520	177570000	8839100	43640000	17769000	198890000	40999000	99935000	42808000	38727000	0	0	18920000	108180000	60877000	23223000	30102000	0	45018000	47011000	0	11993000	0	39690000	101420000	38056000	24091000	31983000	0	31315000	0	0	0	19041000	33341000	0	46276000	41778000	38564000	34354000	60625000
AT3G48000.1	0	36189000	0	45968000	21604000	57847000	63970000	23857000	0	39040000	59277000	41249000	39025000	22129000	28169000	0	30103000	21453000	0	0	0	0	23460000	28916000	14212000	14160000	0	26754000	0	0	0	17426000	0	0	28834000	21897000	38264000	15903000	35609000	24872000
AT3G48170	33569000	0	0	0	0	0	0	0	0	0	0	6483500	0	0	0	0	0	14064000	0	0	0	0	0	19264000	5788000	0	0	0	0	0	0	0	0	0	0	0	0	0	0	14728000
AT3G48420	0	0	0	0	8909600	0	4839300	0	0	0	0	0	5199000	0	0	0	0	0	0	0	0	0	0	0	0	0	0	0	0	0	0	0	0	0	0	0	0	0	0	0
AT3G48530	2630000	0	0	0	0	0	0	0	0	0	0	0	0	0	0	0	0	0	0	0	0	0	0	0	0	0	0	0	0	0	0	0	0	0	0	39936000	3759500	0	0	6229900
AT3G48680	29002000	0	0	0	24591000	0	12481000	0	0	0	0	0	24551000	0	0	0	0	7368000	12754000	0	0	0	0	21027000	9729700	7020900	0	0	0	0	0	0	0	0	0	31040000	0	7542500	0	14504000
AT3G48690	0	0	0	0	12760000	6449200	9043100	9830400	0	0	0	0	0	0	0	0	0	7341100	0	0	0	0	0	0	0	0	0	0	0	0	0	0	0	0	0	0	0	0	0	0
AT3G48730	7810800	0	0	0	6671500	0	0	0	0	0	0	0	0	0	0	0	0	8313000	0	0	0	0	0	0	0	0	0	0	0	0	0	0	0	0	0	0	0	0	0	0
AT3G48930.1	110240000	77819000	60620000	104230000	388400000	295510000	162720000	81767000	59725000	265230000	133910000	258370000	94505000	0	34840000	0	436780000	848810000	101220000	244380000	0	326080000	612100000	384020000	155470000	408220000	0	108430000	0	0	129310000	184720000	640760000	455320000	208370000	83484000	56827000	20197000	198670000	354560000
AT3G48990	253650000	0	25074000	20844000	43490000	37171000	89577000	84342000	41268000	38559000	62684000	57990000	88936000	68155000	38496000	43801000	0	81948000	36795000	0	13110000	0	21354000	37947000	23551000	10563000	32846000	0	24615000	59063000	0	0	29726000	28069000	18768000	168470000	27037000	27424000	61965000	76692000
AT3G49080.1	0	16567000	0	0	28594000	17235000	0	0	0	0	46425000	30848000	11730000	0	0	0	30314000	79096000	0	0	0	44543000	110860000	17478000	12700000	15125000	0	49388000	0	0	0	31001000	19506000	37532000	60571000	29192000	18666000	18523000	36159000	54325000
AT3G49120	308210000	0	21913000	0	55527000	24561000	106950000	122400000	65451000	0	0	137520000	120560000	137190000	82174000	89469000	0	98733000	102490000	0	34626000	0	68299000	88391000	118090000	47030000	66954000	0	70710000	0	0	0	60053000	50729000	53416000	153410000	157630000	263030000	148470000	141660000
AT3G49910.1	2449800000	80399000	2224900000	33347000	990090000	29818000	109630000	2387200000	2408300000	1139300000	795540000	29361000	369440000	2295800000	1104600000	0	899180000	126030000	2529200000	2657100000	0	1981900000	23991000	1498600000	3205200000	2717100000	0	638740000	0	407930000	4436000000	2213700000	2271100000	1301200000	22474000	149840000	3064100000	800640000	883050000	1177900000
AT3G50360	1313900	0	0	0	10431000	0	5078800	0	0	0	0	0	9316400	0	0	0	0	0	0	0	0	0	0	6171600	0	0	0	0	0	0	0	0	0	0	0	0	0	8485700	0	0
AT3G50590	1718300	0	0	0	6771900	0	0	0	0	0	0	0	10803000	0	0	0	0	0	0	0	0	0	0	10775000	0	0	0	0	0	0	0	0	0	0	0	5652300	0	0	0	0
AT3G50820	0	0	0	0	22501000	15116000	0	12219000	0	0	0	7224200	13781000	16660000	0	0	0	10291000	0	0	0	0	0	0	0	0	0	0	0	0	0	0	0	0	0	0	0	0	0	0
AT3G51010	37513000	0	0	21496000	0	7613000	0	0	0	0	0	19208000	0	38181000	0	0	0	7257000	0	0	0	0	0	0	95986000	12826000	0	0	0	0	0	0	11224000	13453000	0	0	7332900	82844000	0	8398500
AT3G51160	0	0	0	0	0	0	0	0	0	0	0	11092000	0	0	0	0	0	0	0	0	0	0	0	0	8252900	0	0	0	0	0	0	0	0	0	0	0	23844000	15955000	0	0
AT3G51260	20807000	0	0	0	18115000	0	12154000	12527000	0	0	0	0	17927000	0	0	0	0	12365000	32921000	0	0	0	0	32167000	0	0	11325000	0	0	0	0	0	8159000	0	0	22086000	14797000	9787000	15147000	0
AT3G51800.3;AT3G51800.1;AT3G51800.2	0	14680000	0	19417000	16898000	27121000	21419000	0	35333000	0	22898000	25976000	53939000	0	0	0	24129000	28068000	0	21001000	0	44553000	24494000	17972000	0	18595000	0	0	0	0	0	22859000	9717700	0	26417000	46207000	25515000	34490000	36666000	25758000
AT3G52140	6971900	0	0	0	6305200	8071300	8126700	0	0	0	0	0	9999500	6694400	0	0	0	7906200	5128400	0	0	0	0	6569000	0	0	0	0	0	0	0	0	0	3207600	0	14906000	0	0	0	7693600
AT3G52150.2;AT3G52150.1	109670000	318760000	45496000	1401200000	164480000	556410000	172010000	85414000	0	0	100830000	741640000	259000000	123010000	176750000	0	108160000	18216000	0	0	0	0	29351000	0	0	0	0	0	0	0	0	0	0	0	12982000	0	0	0	0	0
AT3G52200	95603000	0	49404000	0	1947100000	10054000	337870000	4022100	0	0	0	9492700	308710000	6585900	0	0	0	0	394600000	0	0	0	0	160080000	11195000	4910100	4094400	0	0	114400000	0	0	0	3695400	0	42718000	12639000	8441100	14675000	26684000
AT3G52300	33456000	0	10818000	0	356870000	4873600	148130000	26276000	14784000	0	0	29825000	274510000	56621000	0	0	0	12709000	55574000	0	0	0	7428100	153060000	65782000	0	11912000	0	0	0	0	0	7489900	0	0	29415000	22992000	41601000	16991000	18901000
AT3G52500	2071500	0	0	0	14126000	7979700	0	0	0	0	0	9580000	13644000	10240000	0	0	0	9514700	8009800	0	0	0	8941700	8051900	6192700	0	0	0	0	0	0	0	0	0	0	8490900	0	0	0	0
AT3G52580.1	0	0	0	0	60689000	0	0	0	0	31682000	51315000	0	0	0	0	0	55405000	0	0	0	0	0	0	12822000	0	43243000	0	0	0	0	0	0	0	0	0	0	0	0	33340000	89517000
AT3G52590.1;AT2G36170.1;AT4G05050.4;AT4G05050.3;AT4G05050.2;AT4G05050.1;AT4G02890.2;AT4G02890.1;AT1G55060.1;AT4G05320.5;AT4G02890.4;AT4G02890.3;AT5G03240.3;AT5G03240.2;AT5G03240.1;AT1G65350.1;AT5G37640.1;AT4G05320.6;AT4G05320.3;AT4G05320.1;AT5G20620.1;AT4G05320.4;AT4G05320.2;AT3G09790.1	56635000	0	46240000	0	30167000	0	0	0	42516000	44099000	12062000	0	0	0	0	0	0	0	0	36090000	0	0	0	0	0	23318000	0	0	0	0	0	0	0	0	0	0	0	0	0	0
AT3G52730	14630000	0	0	0	0	0	3713400	0	0	0	0	0	0	0	0	0	0	0	0	0	0	0	0	0	8184400	0	0	0	0	0	0	0	0	0	0	15462000	0	0	0	0
AT3G52880	140210000	36208000	55025000	26118000	69932000	55621000	74591000	83237000	73038000	50386000	75996000	64690000	56231000	70272000	22353000	33321000	0	67574000	63751000	15723000	22582000	0	48727000	69748000	50074000	37283000	41786000	0	0	0	0	0	43257000	41575000	58901000	53468000	71732000	99613000	58269000	75409000
AT3G52930	1119100000	37122000	112560000	51376000	199970000	158890000	238130000	261270000	135060000	0	231760000	340810000	222240000	263890000	50162000	136750000	0	292430000	455510000	47786000	129200000	0	332260000	341250000	414030000	158560000	327960000	0	321840000	135870000	175510000	90282000	264910000	402550000	374850000	461130000	737770000	643830000	440650000	553490000
AT3G52960	4308600	0	14027000	0	26303000	14598000	22333000	0	0	0	0	17237000	0	18609000	0	0	0	13146000	9748300	0	0	0	0	9723000	13054000	0	0	0	0	0	0	0	0	0	0	10198000	8968300	12059000	0	7988400
AT3G52990	22329000	0	0	0	0	0	8439900	0	0	0	0	8828500	0	0	0	0	0	6758600	0	0	0	0	0	0	0	0	0	0	0	0	0	0	0	0	0	8162200	0	6122200	0	6890900
AT3G53020.1	0	0	0	0	0	0	0	0	262030000	99756000	0	0	65635000	0	0	0	188470000	0	456480000	0	0	304190000	0	0	0	232210000	0	190940000	0	0	614670000	0	263500000	282180000	0	0	224910000	0	0	232790000
AT3G53180	10792000	0	0	0	10534000	0	10684000	0	0	0	0	5918100	7856400	0	0	0	0	0	34094000	0	0	0	0	20102000	6375400	0	6248400	0	0	0	0	0	5524600	2698300	0	12140000	7701400	12651000	0	11774000
AT3G53260	20277000	0	0	0	0	0	4083900	0	0	0	0	5508000	4957900	0	0	0	0	0	6217900	0	0	0	0	6974400	9856000	3773100	0	0	0	0	0	0	8751700	10462000	8529400	17653000	17191000	21481000	17299000	13105000
AT3G53420	0	0	0	0	59922000	27398000	20597000	0	0	0	0	0	16980000	0	0	0	0	0	51826000	0	0	0	0	30709000	20244000	0	0	0	0	0	0	0	0	47846000	0	24914000	0	0	0	0
AT3G53430.1	0	0	0	0	0	0	0	0	284180000	186150000	0	0	90278000	0	188280000	0	53956000	0	433570000	0	0	0	0	0	473210000	0	0	0	0	0	867730000	455550000	0	0	0	0	212860000	291850000	0	0
AT3G53520.3;AT3G53520.2;AT3G53520.1;AT3G53520.4	0	0	0	0	0	0	0	0	0	0	0	0	0	0	0	0	0	0	0	0	0	0	0	0	0	0	0	0	0	0	0	0	0	0	12422000	0	0	0	7601500	8093100
AT3G53750	9869400	0	0	0	0	0	8886600	0	0	0	0	0	0	0	0	0	0	0	0	0	0	0	0	6512400	0	0	0	0	0	0	0	0	0	0	0	18492000	0	4957700	0	0
AT3G53870.1	12554000	0	0	16726000	144510000	61509000	0	30576000	0	0	28916000	57278000	34560000	0	0	0	272830000	148380000	0	40944000	0	231040000	209860000	52548000	20734000	109030000	0	0	0	46531000	38821000	60068000	191660000	104690000	62456000	0	11876000	13666000	100770000	236790000
AT3G53890.2;AT3G53890.1	0	191630000	0	76988000	138350000	52152000	30944000	0	58687000	96317000	42510000	199410000	54059000	0	0	0	119630000	682180000	64066000	11349000	0	530600000	481140000	230310000	0	277960000	0	119020000	666000000	0	74655000	295040000	80429000	0	118680000	0	11546000	0	42024000	151850000
AT3G53990	31593000	0	0	0	0	0	9733200	0	0	0	0	5000400	7661200	0	0	0	0	0	25093000	0	9462000	0	0	27747000	12061000	10130000	13873000	0	0	0	0	0	10662000	16966000	0	12311000	19988000	13553000	10217000	25652000
AT3G54050	0	0	17629000	12097000	27671000	21872000	25852000	13495000	12838000	0	0	22499000	22032000	23990000	11999000	16382000	0	20040000	0	0	0	0	0	0	0	0	0	0	0	0	0	0	0	0	0	0	0	0	0	0
AT3G54110	30671000	0	0	0	6436900	0	30037000	0	0	0	0	0	28377000	10249000	0	0	0	8137400	8012900	0	0	0	0	7749700	0	0	0	0	0	0	0	0	0	7978600	0	79396000	0	6892700	0	25091000
AT3G54210.1	302920000	1790700000	814540000	15054000	236720000	19938000	918380000	413970000	144980000	171940000	149820000	31667000	1319100000	171570000	122700000	0	126030000	0	0	0	0	0	0	139810000	0	0	0	0	0	17711000	0	0	0	0	0	68288000	48013000	0	0	17988000
AT3G54400	3579100	0	25077000	0	27753000	19857000	17644000	12021000	14779000	0	0	18711000	22376000	18684000	14315000	0	0	22395000	5015400	0	0	0	0	0	0	0	0	0	0	0	0	0	0	0	0	0	0	6697300	0	0
AT3G54470	30417000	0	0	0	4439200	0	9796200	0	0	0	0	3055000	8699300	0	0	0	0	7010000	4497700	0	0	0	0	13276000	4511800	0	0	0	0	0	0	0	0	3048700	0	46057000	4105400	6303600	0	12624000
AT3G54640	12569000	0	0	0	6807500	0	0	0	0	0	0	0	6620200	0	0	0	0	9505200	5135700	0	0	0	0	0	0	0	0	0	0	0	0	0	0	0	0	0	0	0	0	6621900
AT3G54660	6234900	0	13708000	0	0	10553000	13730000	0	0	15819000	0	0	12839000	0	0	11999000	0	0	8595700	0	0	0	0	0	0	0	0	0	0	0	0	0	0	0	0	0	0	5242700	0	0
AT3G54890	0	0	0	0	24397000	21136000	0	0	0	0	0	24190000	15187000	0	0	0	0	15496000	0	0	0	0	0	0	0	0	0	0	0	0	0	0	0	0	0	0	0	0	0	0
AT3G54960	15963000	0	0	0	0	0	0	0	0	0	0	0	0	0	0	0	0	0	0	0	0	0	0	4688600	6291000	0	0	0	0	0	0	0	0	0	0	0	7284900	9140100	0	5402100
AT3G55120	8698200	0	0	0	0	0	0	0	0	0	0	0	0	0	0	0	0	0	0	0	0	0	0	5711800	3849300	0	0	0	0	0	0	0	0	0	0	4610700	6282500	0	0	0
AT3G55170.2;AT3G55170.1	0	0	0	0	0	0	0	0	0	0	0	0	0	0	0	0	0	0	0	36271000	0	0	0	0	0	21252000	0	0	0	0	0	0	0	0	0	0	19204000	0	0	13275000
AT3G55280.3;AT3G55280.2;AT3G55280.1;AT2G39460.2;AT2G39460.1	1286200000	136570000	1646300000	0	778480000	0	0	1486300000	1845600000	775050000	355060000	10067000	144670000	1618300000	803020000	0	266440000	36512000	1251200000	1787100000	0	1241100000	10760000	691680000	982080000	1629000000	0	87780000	0	196460000	1266500000	1302600000	1485000000	1033800000	14042000	217660000	1295100000	635330000	210160000	666720000
AT3G55410	49261000	0	6138400	0	52604000	7537000	28565000	10523000	0	0	0	26986000	27385000	11374000	0	0	0	13694000	22386000	0	0	0	0	25911000	10654000	5775700	6063800	0	0	0	0	0	0	10317000	0	67114000	11192000	13310000	18185000	25566000
AT3G55440	254120000	71683000	126130000	71062000	185000000	108350000	116830000	146980000	88235000	38339000	151400000	127040000	121450000	152930000	96031000	101600000	0	106090000	159930000	25829000	53011000	0	120480000	124420000	162340000	68633000	124250000	0	114820000	0	116210000	98438000	85511000	123450000	111410000	101510000	173990000	291930000	110830000	197000000
AT3G55620.1	357810000	50818000	617290000	17791000	28884000	25143000	58334000	482730000	302570000	75924000	38719000	42870000	281170000	871300000	529580000	0	96179000	45617000	580770000	293060000	0	13763000	29418000	647500000	1241700000	504080000	0	9518600	60760000	104000000	847030000	302740000	111530000	22868000	53223000	342880000	2296200000	737990000	327500000	65601000
AT3G55800	0	37529000	90886000	30391000	164020000	86887000	94553000	63635000	58733000	0	46848000	106200000	76020000	73309000	47539000	46748000	0	60912000	0	0	0	0	0	0	0	0	0	0	0	0	0	0	0	0	0	0	0	0	0	0
AT3G56070	4457600	0	0	0	4275600	0	0	0	0	0	0	0	8114800	0	0	0	0	0	0	0	0	0	3226700	9385700	0	0	0	0	0	0	0	0	0	0	0	8567100	5478600	5157900	5418800	0
AT3G56090	0	0	0	0	10031000	0	0	0	0	0	0	0	32072000	188220000	154680000	61937000	0	0	39729000	0	31996000	0	0	35773000	24937000	21357000	0	0	0	0	0	0	14418000	0	0	31617000	75583000	129800000	25864000	0
AT3G56150.2;AT3G56150.1;AT3G22860.1	0	0	0	12268000	0	11177000	0	0	0	0	11615000	57471000	0	0	0	0	5596200	0	0	0	0	0	23947000	7449000	0	0	0	0	0	0	0	0	4228300	0	115050000	6506400	5810900	7589000	7991500	0
AT3G56240	16729000	0	0	0	10626000	0	19140000	37356000	0	0	0	18242000	20382000	19377000	0	0	0	0	16644000	0	0	0	0	21628000	28956000	0	0	0	0	0	0	0	0	0	0	15383000	0	33852000	15827000	0
AT3G56310	30597000	0	0	0	0	0	0	0	0	0	0	3329300	3473200	0	0	0	0	0	13279000	0	0	0	0	5834800	0	0	0	0	0	0	0	0	0	0	0	35544000	0	7353100	7602000	13561000
AT3G56490	54243000	0	15171000	0	14089000	0	18840000	12692000	0	0	0	13092000	15223000	15105000	0	0	0	11107000	27989000	0	0	0	14596000	21587000	19720000	10612000	10764000	0	0	0	0	0	9485000	0	0	34502000	27001000	30616000	12053000	19362000
AT3G56910.1	291430000	1548800000	993100000	7779500	0	18974000	1190500000	566590000	138380000	138740000	205720000	22906000	1083300000	196280000	189370000	0	8146300	0	0	0	0	8443400	0	95282000	21221000	0	0	13260000	0	0	0	11300000	0	9944200	0	0	23261000	0	0	16382000
AT3G57010	24317000	0	0	0	0	0	0	0	0	0	0	0	0	0	0	0	0	0	3779800	0	0	0	0	6142100	4641300	0	0	0	0	0	0	0	0	0	0	21852000	0	0	0	0
AT3G57050	6717900	0	0	0	5447000	0	0	0	0	0	0	0	2826900	0	0	0	0	0	0	0	0	0	0	0	0	0	0	0	0	0	0	0	0	0	0	0	0	0	0	0
AT3G57290.1	0	0	0	17290000	0	19013000	0	0	0	0	0	51559000	15627000	0	0	0	8070300	0	0	0	0	0	17681000	4548500	0	0	0	12578000	0	0	0	0	6991700	0	25465000	0	11013000	6287200	9016600	6611000
AT3G57490.1	0	0	0	0	8987300	0	0	0	0	0	8745400	11435000	0	0	0	0	19901000	40026000	0	0	0	14306000	39735000	16214000	0	10362000	0	0	0	0	0	0	2153200	0	6960600	0	0	0	0	15410000
AT3G57560	0	0	5910500	0	16271000	6454500	10818000	0	0	0	0	0	0	14038000	0	0	0	6082000	4735400	0	0	0	0	0	0	0	0	0	0	0	0	0	0	0	0	4330700	0	0	0	0
AT3G57610	22475000	0	34832000	0	22480000	15107000	27058000	25210000	14229000	0	0	16385000	25188000	25298000	21359000	25170000	0	22939000	29204000	0	0	0	21584000	21507000	16917000	0	11341000	0	0	0	0	0	14025000	19214000	0	26389000	24049000	16092000	25560000	20548000
AT3G57890	2225800	0	0	0	0	0	0	0	0	0	0	0	8931100	0	0	0	0	0	0	0	0	0	0	0	0	0	0	0	0	0	0	0	0	0	0	12942000	0	0	0	0
AT3G58500	5019900	0	0	0	3160000	0	0	0	0	0	0	0	0	0	0	0	0	0	0	0	0	0	0	0	0	0	0	0	0	0	0	0	0	0	0	9460700	0	0	0	3743100
AT3G58510	5976200	0	0	0	0	0	0	0	0	0	0	0	0	0	0	0	0	0	0	0	0	0	0	4053300	0	0	0	0	0	0	0	0	0	0	0	14767000	0	0	0	0
AT3G58610	157740000	43896000	119460000	72877000	200030000	148470000	203220000	186210000	144300000	0	92103000	204540000	220990000	273000000	167840000	153410000	0	234110000	162250000	0	63200000	0	182900000	189220000	155150000	93272000	120980000	0	272620000	186120000	0	0	125950000	149640000	99930000	129960000	142400000	159020000	118950000	153180000
AT3G58660.1	0	0	0	0	0	0	0	37065000	0	0	9235600	8384100	31323000	33909000	60158000	0	21228000	0	0	0	0	0	0	6723200	62879000	18738000	0	0	0	0	0	25116000	17575000	0	19440000	0	27864000	30814000	13281000	10092000
AT3G58730	34326000	0	27723000	7214000	273090000	15626000	172330000	46491000	28527000	0	0	22352000	249890000	50937000	28172000	43195000	0	45354000	94069000	0	17718000	0	0	120250000	28419000	0	24689000	0	21458000	0	0	0	32913000	58292000	0	84399000	40076000	31362000	22187000	29967000
AT3G58990	14550000	0	0	0	0	0	0	0	0	0	0	0	0	0	0	0	0	0	0	0	0	0	0	13404000	8247600	0	0	0	0	0	0	0	0	0	0	9011800	0	8024200	0	0
AT3G59040	0	0	0	0	14480000	0	19115000	0	0	0	0	0	24602000	0	0	0	0	0	0	0	0	0	0	0	0	0	0	0	0	0	0	0	0	0	0	0	0	0	0	0
AT3G59540.1;AT2G43460.1	1356900000	65265000	1231800000	0	616420000	20618000	62013000	702710000	1201900000	537770000	412360000	12899000	223560000	1461500000	761010000	0	511530000	86576000	1607200000	1713400000	0	1161800000	23355000	809980000	2940800000	1528700000	0	392120000	0	165520000	3534600000	1636900000	1423200000	818430000	13820000	55328000	1923700000	643590000	497940000	550270000
AT3G59650.1;AT3G59650.2	0	35776000	28096000	0	19205000	0	59150000	15246000	0	0	25946000	3202600	82968000	12470000	0	0	18088000	11526000	9523500	0	0	23885000	0	117120000	17138000	17024000	0	44669000	0	153660000	60967000	16466000	21522000	0	6545200	79497000	151430000	20845000	22479000	24679000
AT3G59760	17307000	0	0	0	9640100	0	9734700	0	0	0	0	9624200	0	0	0	0	0	0	17649000	0	0	0	19196000	10201000	11369000	8825900	0	0	0	0	0	0	0	9226000	0	11115000	15329000	8339100	12243000	17031000
AT3G59920	56301000	0	10616000	0	15016000	10216000	0	0	0	0	0	8870800	10729000	10354000	0	16322000	0	8087300	17840000	0	0	0	15047000	18295000	11494000	10302000	22041000	0	0	0	0	0	9705700	10588000	0	15762000	17790000	12508000	17645000	24709000
AT3G59970	26749000	0	11129000	0	26397000	20502000	36522000	33087000	11743000	0	38731000	45741000	33062000	27360000	0	0	0	17132000	17816000	0	0	0	0	15299000	14578000	8646300	13604000	0	0	0	0	0	13884000	8511300	0	97382000	21624000	20796000	21033000	27645000
AT3G60190	178420000	0	5188700	0	11596000	72670000	51416000	14844000	9957000	0	0	150740000	32793000	19208000	0	0	0	136100000	0	0	0	0	6145200	34672000	4436000	5380600	0	0	27869000	0	0	0	11562000	51439000	0	16860000	0	4135200	21302000	65852000
AT3G60245.1;AT3G10950.1	1424200000	44718000	1593100000	0	803370000	19916000	67643000	1547200000	1639700000	972340000	594030000	16767000	224760000	1289800000	444220000	0	733000000	63900000	2201400000	1748800000	0	669030000	11228000	1140100000	1810200000	1803200000	0	161800000	0	225460000	2443500000	946500000	1528800000	599080000	7537700	126960000	1735400000	313380000	545300000	626440000
AT3G60750	271360000	131710000	237620000	140530000	475990000	318220000	530760000	497250000	367240000	279990000	487890000	309330000	323580000	369500000	251870000	295460000	0	461730000	88841000	0	19713000	0	77968000	138520000	80386000	82499000	93473000	0	175600000	82555000	0	0	70291000	106100000	75791000	81724000	112780000	60547000	105890000	117050000
AT3G60820	105400000	0	13409000	24580000	55832000	14076000	28939000	22598000	0	0	0	22851000	43546000	43518000	0	0	0	24742000	138640000	0	0	0	26650000	26566000	26927000	19747000	22184000	0	0	0	0	0	14487000	7880600	0	49032000	39830000	34999000	46154000	57188000
AT3G61140	4465800	0	0	0	0	0	0	0	0	0	0	0	0	0	0	0	0	0	0	0	0	0	0	3597700	0	0	0	0	0	0	0	0	0	0	0	9862200	0	0	0	0
AT3G61440	48567000	68570000	112640000	50901000	138590000	98311000	225060000	161780000	109370000	83637000	125130000	151910000	147950000	141590000	108120000	127690000	0	119180000	34296000	0	18298000	0	37053000	46171000	44249000	36424000	30279000	0	48053000	0	0	0	39725000	8190400	31538000	52519000	60105000	69707000	65776000	52142000
AT3G61470	0	0	10136000	0	24108000	9513200	16582000	0	0	0	0	0	33432000	27860000	14029000	0	0	27934000	0	0	0	0	0	0	0	0	0	0	0	0	0	0	0	0	0	0	0	0	0	0
AT3G62030	1221800	25760000	53888000	0	106920000	47066000	58390000	43199000	47718000	0	0	44531000	71354000	38909000	32732000	49418000	0	32523000	0	0	0	0	0	12011000	0	0	0	0	0	0	0	0	0	0	0	13014000	0	6832400	0	0
AT3G62120	26635000	0	0	0	11883000	5756600	18825000	12532000	0	0	0	11137000	12502000	9581100	0	0	0	10961000	8553800	0	0	0	10117000	18879000	13252000	7131100	0	0	23284000	0	0	0	9451600	14155000	0	21561000	8835400	7294300	6966700	15414000
AT3G62250.1;AT2G47110.2;AT2G47110.1;AT1G23410.1	81127000	56002000	42075000	122290000	940680000	338980000	109430000	68737000	0	175510000	579690000	219030000	88633000	0	42235000	0	768650000	1341100000	0	289180000	0	1103800000	532220000	602500000	171360000	325820000	0	277090000	0	0	0	372620000	1516700000	800490000	66912000	13544000	59178000	19064000	292150000	710140000
AT3G62290	90715000	0	16116000	0	43187000	20736000	64296000	35991000	16709000	0	0	39449000	41489000	27179000	0	0	0	28791000	42324000	0	0	0	20069000	61548000	39428000	26084000	45501000	0	45441000	0	0	0	24947000	49864000	0	135680000	39601000	44592000	51079000	75743000
AT3G62360	11359000	0	0	0	0	0	0	0	0	0	0	0	0	0	0	0	0	0	0	0	0	0	0	0	0	0	0	0	0	0	0	0	0	0	0	22039000	0	13765000	11387000	10826000
AT3G62530	4533400	0	0	0	0	0	0	0	0	0	0	0	7302400	0	0	0	0	0	0	0	0	0	0	0	0	0	0	0	0	0	0	0	0	0	0	24498000	0	3756700	0	0
AT3G62840	2295000	0	0	0	0	0	0	0	0	0	0	0	0	0	0	0	0	6972900	0	0	0	0	0	4227200	0	0	0	0	0	0	0	0	0	0	0	0	0	0	0	0
AT3G62870.1	917230000	0	697150000	0	323350000	12585000	45450000	334960000	759240000	620480000	224940000	0	165980000	606320000	179110000	0	364150000	32676000	1091200000	868750000	0	428330000	0	468760000	765170000	974720000	0	157410000	0	161550000	1262300000	444810000	630930000	403620000	0	0	829480000	112940000	184650000	312900000
AT3G63140	0	0	37837000	20594000	40811000	25216000	29253000	25549000	0	0	0	38404000	19028000	27240000	0	22934000	0	22531000	0	0	0	0	0	0	0	0	0	0	0	0	0	0	0	0	0	0	0	0	0	0
AT3G63190.1	0	13119000	0	13771000	7718400	12488000	0	0	0	0	10042000	9382400	0	0	0	0	0	0	0	0	0	0	0	0	0	0	0	0	0	0	0	0	0	0	0	0	0	0	0	0
AT3G63410	0	0	0	0	12853000	0	17412000	0	0	0	0	15135000	18252000	10160000	0	0	0	7359700	0	0	0	0	0	0	0	0	0	0	0	0	0	0	0	0	0	4350800	0	0	0	0
AT3G63460	35459000	0	4391900	0	7520100	7296500	16452000	0	0	0	0	6611600	16980000	13459000	0	0	0	0	11661000	0	0	0	0	13884000	8393700	0	0	0	11502000	0	0	0	0	0	0	35157000	6454500	4813100	4841500	10413000
AT3G63490.1;AT3G63490.2	889840000	6210800000	3174900000	64349000	982910000	84435000	5248800000	1517700000	434830000	436060000	685410000	208700000	5046700000	601560000	474990000	0	745960000	34901000	2515100	2795700	0	42316000	1586000	416590000	47657000	20460000	0	31568000	0	188880000	0	20840000	13332000	15936000	2242800	121250000	102760000	1870300	9350300	26725000
AT4G00810.2;AT4G00810.1	341660000	20479000	481430000	5134500	161520000	0	0	865390000	268810000	191390000	86117000	0	61381000	386760000	164740000	0	232000000	21022000	500780000	447480000	0	195440000	21307000	273110000	888650000	341990000	0	87152000	0	0	548690000	426290000	331010000	150010000	5562600	3369300	456810000	127480000	101980000	190450000
AT4G01050	0	0	0	0	9096800	7914200	10398000	0	0	0	0	6661100	9712300	0	0	0	0	7763900	0	0	0	0	0	0	0	0	0	0	0	0	0	0	0	0	0	0	0	0	0	0
AT4G01100	16957000	0	0	0	0	0	5590200	0	0	0	0	0	7956000	0	0	0	0	0	0	0	0	0	0	0	0	0	0	0	0	0	0	0	0	0	0	25785000	0	0	0	5338600
AT4G01150	1894400	0	12698000	0	19041000	0	14904000	0	0	0	0	14990000	11471000	0	0	0	0	0	0	0	0	0	0	0	0	0	0	0	0	0	0	0	0	0	0	0	0	0	0	0
AT4G01310.1	595160000	6722400000	2928700000	63420000	853990000	48726000	4603400000	1018200000	404220000	174090000	743430000	42164000	3391000000	245220000	325060000	0	618400000	44120000	2323900	19298000	0	2101300	0	456400000	38666000	21946000	0	0	0	46219000	4323600	6745500	2446900	3922500	1151200	169360000	127800000	0	7272700	13648000
AT4G01560.1	0	2216500	0	0	0	0	0	0	0	0	3864100	0	8327000	9294300	79214000	0	9558700	0	0	0	0	0	0	9200700	13274000	0	0	0	0	0	0	18854000	0	0	3808300	317000000	286930000	75076000	35538000	0
AT4G01610	14299000	0	0	0	0	3930900	9881600	0	0	0	0	6205700	4977800	0	0	0	0	0	0	0	0	0	0	12839000	5335400	0	0	0	0	0	0	0	6146400	7086200	0	22970000	0	0	6302600	0
AT4G01850	23366000	0	0	0	6727200	6861500	0	0	0	0	0	4798300	4325100	0	0	0	0	0	24147000	0	0	0	0	13198000	12108000	0	8485000	0	0	0	0	0	0	9250000	0	73842000	9647800	9452700	0	16211000
AT4G01870	59550000	0	0	0	17774000	13773000	52580000	10648000	54949000	0	40398000	45709000	28233000	29827000	0	34866000	0	55233000	14220000	0	0	0	0	0	0	0	0	0	0	0	0	0	14754000	13260000	0	15943000	21522000	20938000	34616000	33950000
AT4G02230.1	134330000	0	129940000	0	78254000	0	0	91977000	193400000	88857000	67799000	0	0	77424000	0	0	69927000	0	88714000	51221000	0	58369000	0	41399000	89838000	122540000	0	0	0	0	0	0	57587000	0	0	0	63967000	0	0	53868000
AT4G02450	21974000	0	19708000	0	18927000	0	19154000	18900000	0	0	0	9270900	20964000	18624000	0	20530000	0	16238000	25279000	12662000	6830400	0	19809000	33955000	24322000	14148000	0	0	25981000	0	0	0	10796000	12636000	0	34190000	36448000	29791000	30610000	30813000
AT4G02510	1170300	0	0	0	8973000	0	6942100	0	0	0	0	5949100	9584600	0	0	0	0	0	0	0	0	0	0	3099900	0	0	0	0	0	0	0	0	0	0	0	6267400	0	4521900	0	0
AT4G02520	1006500000	99918000	188490000	103090000	209920000	159490000	1859800000	1509700000	982050000	957070000	1470500000	1462400000	639510000	650520000	381100000	362490000	0	585750000	172890000	26279000	62014000	0	126100000	181990000	91907000	76147000	118550000	0	148010000	0	194090000	139480000	228800000	180270000	266730000	843980000	969060000	830200000	565530000	648370000
AT4G02580	101230000	0	13904000	0	27376000	0	18536000	0	0	0	0	0	65091000	0	0	0	0	14517000	25630000	0	0	0	0	48141000	14073000	0	0	0	0	0	0	0	0	0	0	46186000	26185000	22447000	22455000	26698000
AT4G02620	8572200	0	0	0	190450000	4336800	92037000	0	0	0	0	8209800	101880000	20476000	0	21114000	0	24658000	76242000	0	0	0	0	78413000	11272000	20951000	0	0	0	0	0	0	20417000	26781000	0	43625000	38042000	22194000	20453000	11586000
AT4G02770	0	67716000	134390000	99006000	621690000	104150000	181440000	123040000	46755000	0	70117000	76401000	535890000	246500000	139640000	168610000	0	182830000	0	0	0	0	0	0	0	0	0	0	0	0	0	0	0	0	0	0	0	0	0	0
AT4G02930.1	0	0	0	10021000	8828200	13896000	12620000	0	0	0	9654800	10921000	14313000	0	0	0	12868000	15080000	0	0	0	11549000	17006000	14138000	12296000	13105000	0	0	0	0	0	10103000	0	0	19717000	17315000	16004000	16204000	16568000	19033000
AT4G03280	0	0	0	0	27015000	14051000	28960000	32559000	15881000	0	0	19364000	31545000	32598000	0	0	0	39310000	0	0	0	0	0	0	0	0	0	0	0	0	0	0	0	0	0	0	0	0	0	0
AT4G03520	0	0	11353000	0	20233000	5212400	0	0	0	0	0	10659000	13947000	0	0	0	0	3927800	0	0	0	0	0	0	2559700	0	0	0	0	0	0	0	0	0	0	0	0	3818300	3745800	0
AT4G04640.1	17335000	111440000	39623000	1007900000	87488000	384690000	71962000	40796000	0	0	104520000	659610000	245860000	84134000	71942000	0	107680000	5560700	0	0	0	0	10419000	0	0	0	0	0	0	0	0	0	0	0	3102800	14542000	8211600	0	0	0
AT4G04910	6651000	0	0	0	0	0	0	0	0	0	0	0	1622600	0	0	0	0	1301300	1254100	0	0	0	0	2366300	0	0	0	0	0	0	0	0	0	0	0	56354000	5746200	2831900	1980900	2034700
AT4G05020	32940000	0	0	0	0	0	0	0	0	0	0	0	7611100	0	0	0	0	0	0	0	0	0	0	0	7569200	0	0	0	0	15270000	0	0	0	0	0	25808000	0	10170000	0	14847000
AT4G05120	96796000	0	44449000	37189000	54153000	52673000	0	0	26188000	0	0	165390000	0	19703000	0	34702000	0	25557000	53384000	33573000	35611000	0	155930000	33104000	89660000	18976000	41268000	0	65911000	0	0	0	18737000	47480000	56511000	6210000	149450000	94484000	0	27475000
AT4G05180	0	26334000	42407000	30518000	107530000	44002000	79322000	42354000	0	0	50939000	52636000	55638000	51027000	32340000	30676000	0	39738000	0	0	0	0	0	6611500	11215000	0	0	0	0	0	0	0	0	0	0	0	0	12241000	0	0
AT4G05390	22937000	0	7217100	0	0	0	0	0	0	0	0	0	6280800	0	0	0	0	0	0	0	0	0	0	0	0	0	0	0	0	0	0	0	0	0	0	6818500	0	0	0	0
AT4G05400	156900000	0	23418000	52715000	0	11218000	0	57603000	0	0	0	24037000	0	70490000	0	0	0	29553000	0	22325000	30069000	0	0	0	225590000	24300000	32746000	0	0	0	47907000	0	26609000	0	0	0	87959000	243010000	0	28416000
AT4G05420	0	0	0	0	4054600	0	0	0	0	0	0	0	0	0	0	0	0	0	0	0	0	0	0	3291300	3483700	0	0	0	0	0	0	0	0	0	0	0	0	0	0	0
AT4G08390	53045000	0	0	0	9234600	0	6628000	11469000	0	0	0	13007000	16640000	13492000	0	0	0	14393000	33099000	0	9912700	0	0	27225000	15948000	0	22299000	0	0	0	0	0	12626000	16917000	0	15545000	26493000	25910000	28486000	35457000
AT4G08770	318440000	0	0	0	3470600	0	16882000	0	0	0	0	18185000	0	14279000	0	0	0	13745000	46174000	0	14511000	0	44649000	57602000	23764000	12825000	42952000	0	49578000	0	0	0	34425000	33326000	42003000	84508000	86032000	55893000	88745000	157990000
AT4G08780	54980000	0	0	0	0	0	0	0	0	0	0	0	0	0	0	0	0	0	8268400	0	0	0	11162000	8144300	0	4610000	0	0	0	0	0	0	10802000	13607000	0	21099000	18003000	19114000	21696000	19085000
AT4G08870	0	29671000	68667000	36662000	92902000	54794000	0	0	0	0	0	18711000	16609000	0	14811000	18310000	0	21315000	0	0	0	0	0	0	0	0	0	0	0	0	0	0	0	0	0	0	0	0	0	0
AT4G08900	8554400	0	7561800	0	9283100	9868900	8256000	0	0	0	0	7126200	0	0	0	0	0	6792700	0	0	0	0	0	0	0	0	0	0	0	0	0	0	0	0	0	0	0	0	0	0
AT4G09000	94166000	25388000	32259000	13904000	39105000	29859000	61643000	59637000	21450000	50672000	41931000	48786000	40423000	53371000	41199000	42649000	0	28263000	57840000	11388000	28271000	0	51529000	55347000	65731000	48966000	53287000	0	89833000	84863000	0	33701000	44825000	19306000	0	47530000	25135000	50280000	39244000	50241000
AT4G09010	0	0	15628000	0	29920000	11906000	13441000	22808000	22403000	0	0	9861800	13168000	16263000	10312000	13249000	0	10658000	0	0	0	0	0	0	0	0	0	0	0	0	0	0	0	0	0	0	0	0	0	0
AT4G09320	155670000	0	56876000	29300000	70591000	60972000	58657000	43737000	0	52954000	0	82958000	64934000	74023000	44273000	38656000	0	72601000	62255000	0	29407000	0	58748000	46349000	64675000	18731000	28858000	0	47375000	0	0	0	33762000	44425000	38157000	35686000	94623000	144700000	32214000	68464000
AT4G09650	0	0	40894000	20276000	1126500000	28240000	321110000	64129000	4248700	0	11264000	28489000	461420000	111950000	19066000	27135000	0	72407000	2383100	0	0	0	0	3395900	0	0	0	0	0	0	0	0	0	0	0	0	0	0	0	0
AT4G09800.1;AT1G34030.1;AT1G22780.1	769730000	2558100000	1010900000	2910100000	3888500000	3403500000	1580700000	1367900000	628640000	1796700000	1692400000	2337300000	671880000	425540000	847590000	0	4207200000	10973000000	1127400000	2996400000	92146000	6773800000	8209400000	4269100000	2942500000	3356700000	0	2149900000	1933300000	1063800000	445190000	2886000000	6304000000	5147100000	1955700000	666130000	330910000	524870000	2416600000	5464400000
AT4G10320	11631000	0	0	0	9059700	0	9836200	0	0	0	0	0	19372000	7575300	0	0	0	10351000	0	0	0	0	0	8450700	0	0	0	0	0	0	0	0	0	0	0	23579000	9762100	0	5899000	7861800
AT4G10340	2991100	0	59154000	20150000	251710000	88329000	162120000	88568000	70782000	37408000	0	61413000	277850000	168050000	74142000	97497000	0	167580000	0	0	0	0	0	8267200	3774500	0	0	0	0	0	0	0	0	0	0	8046100	0	0	0	0
AT4G10450.1	90254000	0	55693000	0	40879000	0	0	116730000	79768000	0	58527000	0	0	74685000	0	0	57018000	13301000	234940000	231170000	0	168350000	0	108720000	539450000	323680000	0	0	0	0	255870000	250540000	77191000	152730000	0	6090300	211460000	78116000	50953000	85231000
AT4G10480.2;AT4G10480.1	0	0	0	7578600	6157600	6851600	0	0	0	0	9182200	10383000	0	0	9764000	0	0	8937100	0	0	0	8050300	0	6956800	0	0	0	0	0	0	0	0	7902500	0	9270500	11833000	13484000	10378000	6266300	7235900
AT4G11010	161170000	21584000	41257000	0	74389000	50771000	48834000	53535000	11744000	0	60949000	53631000	61208000	59532000	37521000	42218000	0	56719000	58817000	0	0	0	48067000	80408000	32758000	41462000	20230000	0	0	0	0	0	38141000	28063000	0	46757000	91912000	87309000	86626000	96764000
AT4G11120.1	0	0	0	2534800	0	0	0	0	0	0	0	0	0	0	0	0	0	3074400	0	0	0	0	0	0	0	0	0	0	0	0	0	0	0	0	8585900	3184200	3937300	0	0	3733900
AT4G11150.1;AT3G08560.1	0	55783000	22139000	463740000	32518000	251120000	96444000	8258300	0	35020000	36508000	407680000	162480000	31923000	19838000	0	40659000	127290000	0	26652000	0	15605000	105790000	48681000	7269300	37978000	0	0	0	0	0	38410000	72582000	12720000	117630000	136480000	81952000	43028000	41032000	36657000
AT4G11290	62732000	0	0	0	0	0	0	0	0	0	0	0	0	0	0	0	0	0	38282000	0	0	0	23258000	31423000	19962000	12621000	14901000	0	37863000	0	0	0	9891800	22940000	0	109220000	25628000	25867000	29257000	24064000
AT4G11420.1	0	0	0	33751000	3737500	47851000	0	0	0	0	6023500	132930000	14836000	0	0	0	12176000	9185000	0	0	0	0	53297000	11656000	2749700	3105100	0	15489000	0	0	0	4846500	5506700	0	148590000	20029000	25914000	12505000	16722000	16268000
AT4G11600	16676000	0	0	0	13094000	12907000	23600000	22834000	0	0	0	0	0	0	0	0	0	0	41918000	0	0	0	0	23006000	45544000	20710000	22262000	0	26171000	0	0	0	0	27904000	0	29101000	59326000	56653000	0	29693000
AT4G12800	0	0	0	0	121890000	13229000	24040000	14212000	0	0	0	0	117440000	62946000	0	0	0	34166000	0	0	0	0	0	0	0	0	0	0	0	0	0	0	0	0	0	0	0	0	0	0
AT4G13180	16554000	0	0	0	0	0	0	0	0	0	0	0	0	0	0	0	0	0	0	0	0	0	0	0	0	0	7541700	0	0	0	0	0	0	0	0	16306000	0	0	0	10937000
AT4G13360	3252500	0	0	0	0	0	0	0	0	0	0	5868900	0	0	0	0	0	0	0	0	0	0	0	0	0	0	0	0	0	0	0	0	0	0	0	0	0	7328400	0	0
AT4G13430	148320000	0	23066000	6175200	34440000	29739000	33917000	12893000	17193000	0	0	17467000	39116000	51334000	26098000	44143000	0	40843000	74074000	0	15618000	0	42362000	88068000	71922000	48823000	59985000	0	109550000	0	0	0	26577000	44978000	48953000	72571000	51179000	60592000	62992000	80932000
AT4G13670	0	0	0	0	0	26795000	0	0	0	0	0	19214000	0	0	0	0	0	12013000	0	0	0	0	0	0	0	0	0	0	0	0	0	0	0	0	0	0	0	0	0	0
AT4G13780	2732100	0	0	0	0	0	0	0	0	0	0	0	0	0	0	0	0	0	0	0	0	0	0	0	3904600	0	0	0	0	0	0	0	0	0	0	7394400	0	0	0	0
AT4G13850	18297000	0	0	0	7906400	0	8030300	0	0	0	0	8407200	8719900	9629300	0	0	0	0	10879000	0	0	0	0	12019000	7348100	0	6774600	0	0	0	0	0	0	11222000	0	12056000	12370000	0	0	15248000
AT4G13930	454260000	0	9714200	0	64685000	42597000	56400000	56123000	55430000	0	22706000	80970000	68856000	48289000	21234000	35111000	0	90852000	98451000	0	28693000	0	66223000	131300000	49629000	38939000	64977000	0	98056000	56379000	0	0	65621000	75152000	63256000	132340000	111720000	87703000	95630000	142200000
AT4G13940	747920000	19530000	65587000	0	95217000	104200000	155850000	88771000	101380000	54051000	135810000	155420000	156680000	102820000	64159000	129210000	0	274120000	96134000	0	40299000	0	92066000	189730000	113950000	87466000	116960000	0	213240000	160690000	0	0	121520000	140090000	234110000	228480000	158310000	115710000	162690000	302140000
AT4G14030	7963200	0	0	0	11538000	6093200	9881900	0	0	0	0	7799400	0	8784000	0	0	0	0	12551000	0	0	0	0	12825000	8426400	0	6030200	0	0	0	0	0	0	0	0	18235000	9342400	6884000	0	12940000
AT4G14040	0	0	10095000	0	14723000	8443000	12373000	9426800	8585300	0	0	0	14998000	11227000	0	10687000	0	9076300	0	0	0	0	0	0	0	0	0	0	0	0	0	0	0	0	0	6853500	0	0	0	0
AT4G14320.1;AT3G23390.1;AT4G14320.2	187120000	64017000	165510000	0	76431000	0	0	461460000	228970000	97867000	99020000	0	44029000	140120000	43312000	0	69267000	0	72862000	259530000	0	73974000	0	192320000	275380000	142430000	0	0	0	0	0	107240000	197680000	98810000	0	35441000	284810000	71849000	73494000	142100000
AT4G14570	5492500	0	0	0	0	0	0	0	0	0	0	0	0	0	0	0	0	0	0	0	0	0	0	0	0	0	0	0	0	0	0	0	0	0	0	2952600	0	961110	0	0
AT4G14710	0	0	0	0	0	0	0	0	0	0	0	0	0	0	0	0	0	6284000	0	0	0	0	0	5459500	0	0	0	0	0	0	0	0	0	0	0	0	8502300	9366600	0	0
AT4G14800	38358000	0	9962600	0	33223000	4890700	20333000	0	0	0	0	8065100	41185000	12070000	0	23265000	0	18055000	63619000	0	11352000	0	12917000	24082000	18094000	9899300	9851100	0	0	0	0	0	0	0	0	33794000	30026000	33600000	0	36393000
AT4G14880	101780000	44758000	80617000	38503000	118420000	74123000	92403000	99006000	74818000	70055000	77774000	66830000	79066000	88805000	67317000	67674000	0	52362000	111550000	0	44560000	0	82786000	99220000	90305000	54606000	77902000	0	120780000	192210000	0	0	54289000	47390000	36586000	67119000	114240000	125450000	76608000	92227000
AT4G15000.2;AT4G15000.1	658560000	40764000	750280000	15815000	444720000	14789000	78729000	1036200000	956060000	205350000	315240000	0	132560000	683350000	564320000	0	409850000	74752000	1145800000	1477300000	0	523900000	24474000	567650000	1868500000	1232300000	0	126150000	0	0	878320000	1134700000	935830000	582190000	13424000	82259000	1650400000	496330000	226280000	510430000
AT4G15210	0	70440000	159060000	72959000	283760000	126840000	47157000	50148000	44099000	0	0	68407000	79827000	67043000	33568000	65012000	0	73485000	0	0	0	0	0	0	0	0	0	0	0	0	0	0	0	0	0	0	0	0	0	0
AT4G15390	77404000	0	0	0	0	0	0	0	0	0	0	0	0	0	0	0	0	0	27670000	0	0	0	18488000	21066000	27478000	11150000	23308000	0	0	0	0	0	16280000	17408000	0	35109000	47753000	56888000	33802000	26958000
AT4G15530	0	0	22512000	0	18077000	23353000	45776000	44669000	57819000	0	0	35719000	23676000	29551000	0	0	0	24276000	0	0	0	0	0	0	0	0	0	0	0	0	0	0	0	0	0	0	0	0	0	0
AT4G15640	79106000	0	7241200	0	0	14027000	13199000	0	0	0	0	30606000	23406000	6403200	0	0	0	30245000	56740000	0	0	0	32635000	76415000	12011000	5101600	12220000	0	25867000	0	0	0	10291000	11216000	0	25902000	6524000	0	0	8676100
AT4G15900	1719500	0	0	0	0	2571200	0	0	0	0	0	0	0	0	0	0	0	7042200	0	0	0	0	0	0	0	0	0	0	0	0	0	0	0	3363800	0	0	0	0	0	0
AT4G16143	26448000	0	7549800	0	9854600	0	8489800	0	0	0	0	6546900	13035000	10913000	0	0	0	9230000	7458700	0	0	0	0	8727500	0	0	5922200	0	0	0	0	0	0	8298400	0	12072000	7658100	5321000	0	17348000
AT4G16155	0	15338000	342620000	77989000	408030000	12600000	257090000	54649000	0	0	0	3157700	229520000	44853000	0	18734000	0	8914900	235840000	0	19283000	0	0	482360000	172620000	105980000	35435000	0	0	0	0	0	15215000	0	0	27224000	49800000	41824000	31019000	0
AT4G16260	61598000	0	0	0	11034000	0	60847000	39728000	20737000	0	0	13043000	14272000	17047000	0	0	0	9050900	60715000	13949000	37831000	0	46724000	80899000	52252000	27953000	56228000	0	0	0	0	0	26306000	26231000	0	186050000	313490000	228010000	116490000	107090000
AT4G16450	3504000	0	0	0	17196000	0	13639000	0	0	0	0	0	14292000	10558000	0	0	0	0	5339100	0	0	0	0	16702000	0	0	0	0	0	0	0	0	0	0	0	7963900	0	0	0	6114300
AT4G16660	10893000	0	0	0	0	0	0	0	0	0	0	0	0	0	0	0	0	6391200	0	0	0	0	0	4653500	0	0	0	0	0	0	0	0	0	0	0	0	0	0	0	5190200
AT4G16720.1;AT4G17390.1	3431900000	315030000	4077400000	54259000	1827000000	87035000	290980000	3539600000	2966000000	1983800000	1422500000	66419000	737010000	3658100000	1679100000	0	1319000000	235240000	3990000000	3396700000	0	2467100000	83210000	3243500000	5541600000	5151900000	0	742290000	0	847180000	7289000000	3474100000	3687200000	1987800000	86380000	524940000	6361700000	1787900000	1067300000	1583400000
AT4G16760	55597000	0	0	0	19575000	10127000	21659000	27223000	0	0	0	23192000	15400000	15337000	0	0	0	17073000	16479000	0	0	0	0	13330000	18930000	0	10337000	0	0	0	0	0	0	9590200	0	21168000	17589000	25688000	0	11092000
AT4G17140	0	0	0	0	8326700	0	9287600	0	0	0	0	0	11777000	0	0	0	0	0	0	0	0	0	0	0	0	0	0	0	0	0	0	0	0	0	0	13010000	0	0	0	0
AT4G17260	2133900	0	0	0	0	0	0	0	0	0	0	0	0	0	0	0	0	0	5459400	0	0	0	0	5706700	0	0	0	0	0	0	0	0	0	0	0	6656000	0	0	5080300	0
AT4G17560.1	166520000	982740000	486330000	9861200	136790000	0	603700000	238720000	78055000	37035000	28184000	9640400	276040000	0	95384000	0	75262000	0	0	0	0	0	0	51585000	0	5532100	0	0	0	0	0	4513700	0	0	0	33404000	13872000	0	2167000	0
AT4G17830	16592000	0	6998100	0	5957800	0	11658000	11953000	0	0	0	8810400	9338500	9409000	0	0	0	9008700	10902000	0	0	0	6243400	10784000	5427100	4947800	6766200	0	0	0	0	0	0	6981600	0	12975000	8530600	5548100	7493800	13365000
AT4G18090	3598300000	2436800000	10914000000	4505200000	3009600000	4515700000	64034000	0	4723300000	0	486270000	8874200000	1899200000	4279400000	4152600000	5425000000	0	2440100000	2549200000	0	4776700000	0	6874800000	2564800000	3202400000	3169000000	3937600000	14416000	6480300000	0	1086300000	107530000	4666600000	2905100000	6478500000	1452100000	5490500000	3641600000	7347600000	2655200000
AT4G18100.1	853130000	44546000	843440000	10005000	740400000	15032000	46502000	640410000	813570000	659320000	475680000	9813600	137160000	397580000	595850000	0	344320000	66603000	1954600000	1555700000	0	312680000	23891000	453710000	1946100000	1825300000	0	80283000	0	185740000	1441400000	1203000000	554590000	197100000	8850200	67051000	1798400000	340650000	434420000	502920000
AT4G18480	0	0	0	0	0	0	21739000	0	10102000	0	0	0	11899000	0	0	0	0	0	0	0	0	0	0	0	0	0	0	0	0	0	0	0	0	0	0	0	0	0	0	0
AT4G19006	14230000	0	0	0	13632000	0	24034000	0	0	0	0	0	38360000	0	0	0	0	0	0	0	0	0	0	11436000	0	0	0	0	0	0	0	0	0	0	0	34328000	0	0	0	3996600
AT4G19410	6052100	0	0	0	0	8025600	45152000	0	0	0	0	16793000	21609000	0	0	0	0	11431000	0	0	0	0	0	19524000	9092700	0	0	0	0	0	0	0	0	0	0	41299000	0	8020000	18684000	15806000
AT4G19880	100130000	0	28535000	7008200	28518000	11258000	23026000	34971000	0	0	0	37120000	19618000	18893000	6835600	35756000	0	19989000	105420000	0	31970000	0	62910000	74300000	54422000	39264000	40383000	0	43228000	0	0	0	34912000	45521000	0	62136000	59783000	58362000	56058000	72058000
AT4G20260	32045000	0	0	0	35604000	24746000	24572000	20129000	0	0	0	39800000	0	17932000	0	0	0	0	64060000	0	16884000	0	0	21390000	59259000	0	20327000	0	0	0	0	0	0	19826000	0	12080000	28423000	45129000	0	35549000
AT4G20360.1	13931000	63394000	12129000	199240000	79610000	223860000	50227000	61152000	13994000	36776000	64539000	97959000	54052000	16190000	57492000	0	105800000	8313600	0	0	0	0	7692300	6428100	0	6044000	0	8864000	0	0	0	0	0	0	13876000	0	0	0	4169100	3108600
AT4G20830	14197000	0	0	0	0	0	9755300	0	0	0	0	5736100	5984000	11749000	0	0	0	0	10298000	0	0	0	0	8962600	7485400	0	0	0	0	0	0	0	0	10564000	0	9469100	6851400	5199300	10291000	0
AT4G20850	119910000	6349800	64159000	10608000	912720000	14034000	886590000	109660000	14524000	8750200	4735100	39355000	1377800000	172320000	45058000	49117000	0	78930000	373570000	0	15820000	0	22729000	882080000	142390000	25407000	38411000	0	19656000	445400000	0	0	29282000	32649000	6732000	2050100000	835200000	314040000	111600000	107740000
AT4G21150	49220000	0	0	0	7617400	0	9520800	0	3246200	0	0	3355600	10901000	5216500	0	0	0	2749800	8104900	0	0	0	0	9817100	10598000	0	0	0	0	0	0	0	3927000	2913400	0	162590000	2763800	3228500	9433100	22539000
AT4G21280	0	45723000	129270000	58712000	258700000	94633000	168420000	114470000	65875000	0	66337000	146870000	88831000	113220000	60379000	64690000	0	65358000	0	0	0	0	0	8103400	10900000	0	0	0	0	0	0	0	0	0	0	0	0	0	0	0
AT4G21580.3;AT4G21580.1;AT4G21580.2	0	0	0	0	0	0	0	0	0	0	0	0	0	0	0	0	0	0	0	0	0	0	0	3836400	0	0	0	0	0	0	0	0	0	0	4103000	0	4345200	0	0	0
AT4G22000	30157000	0	0	21862000	0	0	0	19367000	0	0	0	0	0	21504000	0	0	0	0	0	0	0	0	0	0	36052000	0	12679000	0	0	0	0	0	0	0	0	0	32084000	64385000	0	0
AT4G22010	0	0	0	0	0	0	0	0	0	0	0	0	0	0	0	0	0	0	3683100	0	0	0	0	0	0	0	0	0	0	0	0	0	0	0	0	8169200	0	0	4426700	4129900
AT4G22670	16056000	0	4898300	0	7321400	6473500	11368000	0	5334600	0	0	8341100	0	0	0	0	0	0	13824000	0	0	0	0	9711100	9097500	7851500	8050300	0	0	0	0	0	0	6416500	0	7266700	0	4642600	7200400	6374300
AT4G22690	7950300	0	0	0	12720000	0	26272000	0	0	0	0	10589000	13842000	0	0	0	0	0	0	0	0	0	0	5776800	0	0	0	0	0	0	0	0	0	0	0	18686000	0	0	0	5367400
AT4G22930	11972000	0	0	0	0	0	0	0	0	0	0	0	0	0	0	0	0	0	0	0	0	0	0	0	0	0	0	0	0	0	0	0	0	0	0	0	6438400	3639200	0	0
AT4G23100	113180000	0	19032000	13465000	31343000	29204000	38076000	37923000	25474000	0	0	29405000	58811000	42376000	35811000	41423000	0	56084000	35489000	0	11111000	0	27614000	42288000	25162000	12453000	19178000	0	29474000	0	0	0	13804000	18759000	0	46504000	28646000	32366000	19112000	45305000
AT4G23600	0	154450000	308780000	147880000	375400000	188820000	192740000	198250000	143710000	45530000	96460000	128980000	247770000	251980000	201580000	271550000	0	184320000	0	0	0	0	0	0	0	0	0	0	0	0	0	0	0	0	0	0	0	0	0	0
AT4G23620.1;AT4G23620.2	13800000	40886000	46056000	0	29564000	0	47172000	27591000	0	0	25337000	0	75334000	0	12757000	0	31741000	6535300	34839000	26074000	0	26350000	0	328300000	35015000	38128000	0	36112000	0	0	0	35512000	18843000	0	1763600	71490000	389240000	28822000	55434000	94937000
AT4G23650	9043400	0	0	0	4596000	0	0	0	0	0	0	7150500	4612500	0	0	0	0	0	12136000	0	0	0	7530200	5927500	7104100	0	0	0	0	0	0	0	0	0	0	10217000	0	10063000	0	11571000
AT4G23670	86415000	68352000	149050000	58545000	170020000	130590000	62060000	49730000	0	0	60166000	67917000	65843000	45931000	74915000	38107000	0	60590000	120270000	0	51740000	185610000	71793000	167280000	137680000	51588000	108830000	0	54635000	0	0	0	38369000	25457000	27379000	41727000	101570000	57305000	46800000	61215000
AT4G23680	2563900	0	10991000	0	21056000	9306800	8615400	0	0	0	0	0	9603000	0	0	0	0	7665300	7023800	0	0	0	0	0	0	0	0	0	0	0	0	0	0	0	0	0	0	0	0	0
AT4G23690	17033000	0	0	0	0	0	0	0	0	0	0	0	0	0	0	0	0	0	11763000	0	0	0	0	10985000	4303600	0	0	0	7722700	0	0	0	4002700	8950900	0	40863000	0	2184900	9564500	8095400
AT4G23710	6430700	0	0	0	0	0	16982000	0	0	0	0	0	31029000	13690000	0	0	0	0	0	0	0	0	0	0	0	0	0	0	0	0	0	0	0	0	10198000	8821200	0	0	0	0
AT4G23850	43503000	0	0	0	4195200	1839800	19531000	0	0	0	0	8986500	6775600	5139000	0	0	0	4729800	2934000	0	0	0	0	13260000	5392300	2887300	0	0	4032500	0	0	0	4950700	8395300	0	243550000	17517000	20120000	27478000	22682000
AT4G23940	0	0	0	0	0	0	15168000	0	0	0	0	0	10296000	0	0	0	0	0	0	0	0	0	0	0	0	0	0	0	0	0	0	0	0	0	0	4975200	0	0	0	0
AT4G24190	84057000	0	11020000	0	30484000	15787000	43545000	27562000	14887000	0	0	33398000	21236000	12517000	0	0	0	13806000	33784000	0	0	0	0	42870000	42689000	22073000	24407000	0	33404000	0	0	0	15468000	26888000	13310000	157760000	28852000	35464000	31118000	42594000
AT4G24220	34467000	0	8197000	0	10218000	9189500	10405000	0	12026000	0	0	11513000	11400000	9052700	0	11038000	0	11494000	11878000	0	0	0	0	10809000	6756300	0	5795800	0	10188000	0	0	0	7604100	9567000	0	10264000	0	7514000	10774000	12700000
AT4G24280	12835000	0	9123700	0	29094000	21377000	18444000	17791000	11534000	0	0	17187000	15525000	15938000	0	0	0	15831000	7873700	0	0	0	0	7953800	8247000	0	0	0	0	0	0	0	0	0	0	7126300	0	7010800	5962000	8857900
AT4G24620	71649000	0	17956000	0	14719000	9599300	19082000	0	0	0	0	11038000	14662000	8681500	0	0	0	13682000	35171000	0	16031000	0	27821000	53475000	20683000	20841000	29124000	0	33810000	0	0	0	21048000	24216000	0	16958000	19805000	28251000	25826000	31124000
AT4G24770	0	0	22042000	0	25858000	19745000	15387000	14964000	0	0	0	9296300	15659000	0	16747000	0	0	12950000	0	0	0	0	0	0	0	0	0	0	0	0	0	0	0	0	0	0	0	0	0	0
AT4G24820	48411000	0	0	0	24728000	0	44654000	0	12750000	0	0	4918800	82576000	28467000	0	0	0	8162300	22693000	0	0	0	12220000	35087000	19651000	0	9173800	0	20387000	0	0	0	0	7781500	0	149200000	51504000	46028000	26877000	21719000
AT4G24830	31331000	0	26696000	0	40301000	15304000	23725000	0	16648000	0	0	21806000	15121000	16786000	17797000	29352000	0	21028000	15777000	0	9105000	0	0	36171000	17003000	11489000	10890000	0	0	0	0	0	9321800	11442000	31069000	17503000	15263000	16552000	19241000	31233000
AT4G25050	0	0	14849000	0	13965000	8769500	22205000	0	0	0	0	0	0	22325000	0	0	0	0	0	0	0	0	0	0	0	0	0	0	0	0	0	0	0	0	0	0	0	0	0	0
AT4G25100	71641000	23553000	43200000	21921000	30047000	27713000	23758000	0	17707000	0	0	9114600	53674000	83689000	85555000	143440000	0	80288000	36110000	9553800	18973000	0	46538000	38352000	13218000	26893000	0	0	36543000	25260000	0	0	59508000	48064000	38715000	19564000	36944000	12370000	63304000	56419000
AT4G25630	29853000	0	0	0	0	0	0	0	0	0	0	0	0	0	0	0	0	18144000	0	0	0	0	0	11995000	12213000	0	0	0	0	0	0	0	0	0	0	47256000	18149000	20187000	0	11599000
AT4G25890.1	26646000	0	0	0	14882000	0	0	0	0	0	0	0	0	0	0	0	0	0	0	61009000	0	48067000	0	25505000	38216000	21288000	0	0	0	0	102040000	67700000	86403000	0	0	0	36810000	0	0	0
AT4G25900	3692600	0	0	0	6000300	0	7359100	0	0	0	0	0	0	0	0	0	0	0	5991000	0	0	0	0	6348200	0	0	0	0	0	0	0	0	0	5161700	0	0	0	0	0	0
AT4G26010.1	0	0	0	0	0	0	0	0	0	0	0	0	0	0	0	0	0	13212000	0	0	0	7402500	16124000	10346000	0	0	0	0	0	0	0	0	20550000	25973000	88265000	15925000	13937000	16807000	30994000	27151000
AT4G26300	7139100	0	0	0	0	0	0	0	0	0	0	0	0	0	0	0	0	0	0	0	0	0	0	4193900	0	0	0	0	0	0	0	0	0	0	0	13461000	0	0	0	0
AT4G26530	0	0	6053100	0	5325500	0	6144400	0	0	0	0	0	0	5268000	0	0	0	4498400	0	0	0	0	0	0	0	0	0	0	0	0	0	0	0	0	0	0	0	0	0	0
AT4G26690	27080000	0	6606300	0	9993600	8189300	9836900	0	0	0	0	0	7393500	0	0	0	0	8398900	16239000	0	11071000	0	21375000	17732000	0	0	10394000	0	20430000	0	0	0	14921000	18988000	0	23851000	16019000	9336600	23098000	19548000
AT4G26900	4698400	0	0	0	0	0	0	0	0	0	0	0	0	0	0	0	0	0	0	0	0	0	0	4193800	2455200	0	0	0	0	0	0	0	0	0	0	0	0	0	0	3780800
AT4G26970	125560000	0	11493000	0	16855000	10816000	26848000	23070000	15800000	0	0	15388000	24771000	22211000	0	0	0	28551000	28226000	0	0	0	11860000	34423000	13917000	15335000	19036000	0	28775000	0	0	0	17619000	22644000	13840000	77150000	18628000	18549000	31472000	65517000
AT4G27090.1	1338300000	33196000	1183400000	0	668920000	0	51340000	955040000	1287200000	829500000	236500000	15057000	126840000	609930000	325060000	0	714870000	47432000	2254700000	1402800000	0	381730000	19918000	687220000	1454400000	1900300000	0	179880000	0	237070000	1721200000	691210000	1087300000	451810000	8172900	27450000	1853300000	257220000	430990000	701560000
AT4G27450	62255000	0	0	0	0	0	0	0	0	0	0	0	0	0	0	0	0	0	75609000	0	23186000	0	30510000	52244000	24202000	29314000	20415000	0	32756000	0	0	0	31624000	27537000	21609000	25591000	20418000	15958000	25798000	29639000
AT4G27500	1020500	0	0	0	0	0	6918500	0	0	0	0	6078400	6179400	8170100	0	0	0	4391800	4943500	0	0	0	0	4979600	5539800	0	4123500	0	0	0	0	0	0	2740100	0	0	6984500	6829500	0	5002700
AT4G27520	0	0	15445000	0	24913000	23847000	26455000	25387000	0	0	25551000	31170000	17729000	0	0	0	0	19532000	0	0	0	0	0	0	0	0	0	0	0	0	0	0	0	0	0	0	0	0	0	0
AT4G27585	42984000	0	16300000	0	33231000	5631300	80867000	41490000	0	0	0	16768000	55808000	81880000	0	13728000	0	25647000	53201000	0	0	0	0	166680000	34105000	15281000	15477000	0	0	81353000	0	0	29850000	26573000	0	38786000	17293000	19879000	44992000	75775000
AT4G28440.1	0	0	0	0	0	0	0	0	0	0	0	0	0	0	0	0	0	0	0	0	0	0	2261000	0	0	0	0	0	0	0	0	0	0	0	33010000	0	4158400	0	5807300	6738100
AT4G28470	0	0	0	0	0	0	0	0	0	0	0	0	9220000	0	0	0	0	0	0	0	0	0	0	6310900	0	0	0	0	0	0	0	0	0	0	0	37766000	0	0	0	0
AT4G28510	40074000	0	0	0	36877000	0	129100000	0	0	0	0	0	68314000	0	0	0	0	4387000	12950000	0	0	0	0	163100000	14792000	7546400	0	0	0	0	0	0	0	0	0	81696000	9752700	13886000	25114000	29135000
AT4G28520	14595000	0	0	0	0	0	0	0	0	0	0	0	20678000	31245000	0	0	0	13846000	14019000	0	13302000	0	27721000	0	0	0	0	0	15145000	0	0	0	0	4151100	0	0	0	0	0	0
AT4G28750	0	0	0	19023000	102300000	0	43355000	20525000	0	0	0	13947000	112860000	57306000	38048000	49994000	0	35165000	0	0	0	0	0	0	0	0	0	0	0	0	0	0	0	0	0	0	0	0	0	0
AT4G29010	5559000	0	0	0	6528000	3796500	7482500	0	0	0	0	7461100	10040000	8980600	0	0	0	13492000	0	0	0	0	0	7755500	0	0	0	0	0	0	0	0	4395500	0	0	5761100	0	4675500	0	4581000
AT4G29040	134950000	0	0	0	74060000	4393100	80679000	0	0	0	0	23670000	163850000	8642400	0	0	0	19817000	19939000	0	0	0	4899000	78156000	5958300	9511000	5808500	0	13902000	0	0	0	10510000	12879000	0	367080000	30911000	29511000	65160000	94224000
AT4G29060.1;AT4G29060.2	0	11423000	0	12557000	10444000	9132100	0	0	0	0	13576000	14243000	7117200	0	8831400	0	7602700	0	0	0	0	0	0	0	0	0	0	0	0	0	0	0	0	0	0	0	0	0	0	0
AT4G29120	0	0	0	0	0	0	0	0	0	0	0	4538300	4383700	0	0	0	0	0	0	0	0	0	0	0	0	0	0	0	0	0	0	0	0	0	0	0	0	4463600	0	4525100
AT4G29130	28574000	0	3771300	0	8713800	6568700	10887000	0	0	0	0	8658200	12249000	10010000	0	0	0	6968600	11211000	0	0	0	0	12101000	9278300	0	0	0	0	0	0	0	0	3901700	9390100	27425000	10491000	8856400	8998500	11513000
AT4G29350	9174900	0	0	0	18690000	8795600	19381000	0	0	0	0	0	0	0	0	0	0	0	21744000	0	0	0	0	27403000	14282000	0	16190000	0	0	0	0	0	0	18994000	0	12793000	0	9012500	16009000	21078000
AT4G29410.2;AT4G29410.1	341970000	0	454470000	0	245620000	0	14958000	160680000	419910000	266250000	227740000	0	55850000	213180000	175730000	0	366630000	8932600	810530000	508320000	0	276180000	11612000	309810000	844190000	853400000	0	49455000	0	0	367250000	404140000	598020000	287100000	0	0	427350000	147910000	126860000	208840000
AT4G29430.1	0	0	0	0	9050100	12767000	0	0	0	0	0	0	0	0	0	0	0	25044000	0	0	0	0	24876000	0	0	0	0	0	0	0	0	0	7103600	0	12754000	0	0	0	8753800	7225300
AT4G29680	2754600	0	0	0	0	0	0	0	0	0	0	0	0	0	0	0	0	0	0	0	0	0	0	7083100	0	0	0	0	0	0	0	0	0	0	0	5754700	0	0	0	0
AT4G29690	5803800	0	0	0	0	0	0	0	0	0	0	0	0	0	0	0	0	0	0	0	0	0	5996100	0	0	0	0	0	0	0	0	0	0	0	0	4124900	0	7270200	0	4934400
AT4G29840	9226800	0	0	0	9513600	9194400	11800000	0	0	0	0	11923000	0	0	0	0	0	15647000	11890000	0	0	0	0	11210000	8669000	0	9872800	0	0	0	0	0	0	6881400	0	12391000	10722000	13735000	0	9698700
AT4G30170	57968000	0	0	0	0	0	0	0	0	0	0	0	0	0	0	0	0	0	18145000	0	0	0	20213000	13728000	0	0	0	0	0	0	0	0	12802000	16334000	0	75331000	15801000	13528000	21170000	18230000
AT4G30190	82583000	0	0	0	11864000	0	19383000	0	0	0	0	10021000	48094000	16968000	0	9599600	0	14184000	50422000	0	0	0	0	48502000	31021000	22363000	17096000	0	0	126300000	0	0	47640000	62524000	32187000	54660000	20220000	19008000	0	27223000
AT4G30270	6225100	0	0	0	0	0	8720600	0	0	0	0	0	0	0	0	0	0	0	0	0	0	0	0	0	0	0	0	0	0	0	0	0	0	0	0	8144100	0	0	0	0
AT4G30530.1;AT4G30550.1	0	5883000	0	6266200	7148600	0	0	0	0	0	5122600	6215200	0	0	0	0	0	6973100	0	0	0	0	9174800	3955500	0	0	0	0	0	0	0	0	0	0	15104000	4760600	4659600	0	11254000	6283700
AT4G30690.1;AT4G30690.2	0	10011000	0	57952000	0	52076000	0	0	0	0	0	53058000	3748400	0	0	0	0	0	0	0	0	0	0	0	0	0	0	0	0	0	0	0	0	0	0	0	0	0	0	0
AT4G30800.1	0	0	0	0	0	0	0	0	0	0	0	0	0	0	0	0	16024000	20909000	0	0	0	0	32648000	0	0	20434000	0	0	0	0	0	0	0	0	0	0	0	0	0	0
AT4G30920	9458900	7198000	12083000	0	15815000	8390500	13669000	17244000	8246300	0	0	12289000	8541400	15696000	9538600	16142000	0	7727400	11020000	0	0	0	0	11161000	7307900	0	0	0	0	0	0	0	4393300	8640800	0	11718000	7444600	6747300	11986000	8799900
AT4G30930.1	0	11719000	19998000	0	0	0	22574000	0	0	0	10842000	0	58471000	0	0	0	10110000	0	0	0	0	0	0	84607000	0	0	0	0	0	0	0	26566000	10395000	0	13944000	74045000	96385000	56181000	25191000	0
AT4G31180	12756000	0	0	0	0	0	0	0	0	0	0	3755000	0	0	0	0	0	0	0	0	0	0	0	0	3958100	0	0	0	0	0	0	0	0	0	0	0	0	4738000	0	0
AT4G31300	10341000	0	0	0	26474000	0	18882000	0	0	0	0	24926000	26240000	24302000	19522000	0	0	16607000	46461000	0	0	0	29839000	23496000	28828000	0	13172000	0	0	0	0	0	0	0	0	19373000	27620000	34594000	23285000	14021000
AT4G31460.1	0	34496000	21289000	0	11142000	0	8533500	0	0	0	22584000	0	57958000	0	10882000	0	17008000	3722900	11927000	12780000	0	10403000	0	116710000	28825000	19341000	0	11319000	0	0	0	23170000	14634000	0	0	63721000	143020000	20799000	23552000	27113000
AT4G31480	5797000	0	0	0	0	0	0	0	0	0	0	0	5313200	0	0	0	0	0	0	0	0	0	0	3505300	0	0	0	0	0	0	0	0	0	4121700	0	12558000	0	0	0	0
AT4G31500	30256000	0	0	0	5100700	0	12862000	0	0	0	0	10358000	17902000	8234300	0	0	0	5218000	1699400	0	0	0	0	10818000	4557600	0	4029100	0	0	0	0	0	0	3292200	0	112050000	5046800	6438200	10368000	19936000
AT4G31700.1;AT4G31700.2	0	0	0	37500000	200550000	135130000	0	0	0	0	30215000	77189000	34007000	0	0	0	153050000	340920000	74538000	73976000	0	98696000	158950000	150220000	60194000	116090000	0	0	0	0	0	0	201800000	0	46888000	24727000	17771000	0	83767000	150470000
AT4G31810	229150000	0	13683000	0	3068000	36652000	21130000	0	0	0	0	61146000	29713000	7023800	0	0	0	69669000	137600000	0	12290000	0	45488000	131500000	23106000	0	28257000	0	93522000	0	0	0	39947000	39030000	58200000	82686000	20212000	12039000	20916000	40776000
AT4G31990	60510000	24057000	45849000	14956000	69280000	40875000	70638000	47365000	38164000	0	37255000	65819000	68856000	53731000	44142000	60819000	0	70235000	52103000	0	17329000	0	51025000	50299000	63998000	26460000	38310000	0	28894000	0	0	0	36579000	23859000	0	37624000	73503000	86853000	63807000	73903000
AT4G32190	0	0	0	0	0	0	0	0	0	0	96765000	0	0	0	0	0	0	33016000	0	0	0	0	0	15322000	0	0	116810000	0	0	0	0	0	0	0	0	0	110270000	34407000	0	0
AT4G32260	0	0	48966000	30519000	675920000	25099000	200280000	90171000	26248000	0	0	51081000	396970000	94212000	33571000	28328000	0	44898000	0	0	0	0	0	4903800	2523700	0	0	0	0	0	0	0	0	0	0	0	0	0	0	0
AT4G32285	16278000	0	0	0	0	0	0	0	0	0	0	21671000	0	0	0	0	0	10991000	0	0	0	0	0	0	0	0	0	0	24948000	0	0	0	10614000	18063000	0	0	0	0	0	9890600
AT4G32520	7804000	0	0	0	0	8100700	9521000	0	0	0	0	9017400	7095600	7857900	0	0	0	10077000	5075600	0	0	0	0	7156600	5158800	0	2587000	0	0	0	0	0	0	4703700	0	8083200	5603900	6372100	0	6979700
AT4G33010	18942000	44535000	174530000	57042000	232300000	186670000	155700000	74748000	157330000	0	0	116190000	88675000	73146000	38044000	110900000	0	124020000	6310800	0	0	0	0	9769700	1871800	0	3145300	0	0	0	0	0	9371400	3177300	0	6869600	6075100	5792100	3842700	19390000
AT4G33030	0	0	0	0	5258100	0	3145700	0	0	0	0	0	0	5767000	0	0	0	4123500	0	0	0	0	0	0	0	0	0	0	0	0	0	0	0	0	0	0	0	0	0	0
AT4G33070	319330000	0	17642000	0	113600000	0	22777000	0	0	0	0	0	181880000	27707000	0	15531000	0	73828000	2397600000	66937000	64147000	68167000	94681000	1313800000	105070000	38623000	87551000	0	64442000	857760000	76254000	31367000	309100000	124500000	0	1134600000	265360000	150190000	136600000	204720000
AT4G33090	69290000	0	0	0	12762000	0	33755000	13693000	0	0	0	13212000	22889000	8574200	0	0	0	4230300	16813000	0	0	0	10344000	27890000	11796000	0	7509100	0	9073100	0	0	0	5467500	16752000	0	296570000	9247500	14694000	25230000	54339000
AT4G33250.1	0	0	0	17045000	0	13562000	0	0	0	0	4655200	28401000	0	0	0	0	0	0	0	0	0	0	11502000	5527800	0	0	0	0	0	0	0	0	0	0	29717000	0	12828000	0	10141000	0
AT4G33640	0	0	0	0	0	0	0	0	0	0	0	0	0	0	0	0	0	0	3518000	0	0	0	0	4216700	0	0	0	0	0	0	0	0	0	0	0	0	4421600	3648200	0	0
AT4G33650	3229800	0	0	0	2102500	0	0	0	0	0	0	0	3839300	0	0	0	0	0	0	0	0	0	0	2533600	0	0	0	0	0	0	0	0	0	0	0	16405000	0	0	0	3391900
AT4G33680	12868000	0	0	0	19594000	18730000	17075000	0	23870000	0	0	22483000	19936000	27345000	0	0	0	17726000	15878000	0	0	0	16440000	12142000	11341000	0	0	0	0	0	0	0	0	11884000	0	13539000	0	10932000	0	13609000
AT4G33720	71463000	0	0	0	0	0	0	0	0	0	0	0	0	0	0	0	0	0	13862000	0	0	0	0	0	0	0	0	0	0	0	0	0	0	0	0	44846000	75908000	56092000	32005000	27588000
AT4G33865.1;AT3G44010.1;AT3G43980.1	0	0	0	0	8935900	0	0	0	0	17317000	15421000	0	0	0	0	0	9082700	10691000	0	0	0	0	0	70943000	0	10844000	0	0	0	0	0	0	0	0	0	0	0	0	0	0
AT4G34050	219040000	0	0	0	12127000	8947500	30435000	20592000	8161500	0	0	18031000	28689000	23875000	6174100	11614000	0	26578000	15669000	0	0	0	0	27534000	16554000	12050000	27515000	0	11123000	0	0	0	12179000	16023000	19635000	134050000	29346000	19780000	50661000	87155000
AT4G34110	4454200	0	0	0	10303000	0	17137000	0	0	0	0	6066000	8361700	14584000	0	0	0	0	9368100	0	0	0	0	10942000	12687000	0	0	0	0	0	0	0	0	7072800	0	36854000	13009000	26061000	18507000	12303000
AT4G34180	56093000	0	20869000	0	28235000	13705000	25357000	28473000	0	0	36337000	31103000	17627000	0	0	0	0	12000000	28847000	0	0	0	0	23756000	22840000	11303000	21115000	0	0	46385000	0	0	18812000	14116000	0	17978000	33086000	40440000	27365000	23588000
AT4G34200	198020000	0	0	0	47195000	29496000	33270000	63474000	0	71620000	67274000	61084000	33377000	66882000	0	49184000	0	68803000	32891000	0	12899000	0	30850000	54719000	25692000	33848000	25951000	0	53644000	0	0	0	27008000	51213000	0	57830000	51398000	36643000	40539000	77516000
AT4G34230	19011000	0	5132000	0	6055100	0	7226200	10647000	0	0	0	8617900	11326000	9554600	0	0	0	6718400	6037300	0	0	0	0	0	8188900	0	0	0	0	0	0	0	4213800	0	0	5954700	4799100	6806000	4977400	0
AT4G34450	177720000	0	9406000	0	41342000	14036000	36919000	9483500	0	0	0	23902000	40186000	15646000	0	0	0	21628000	27689000	0	0	0	6031800	55468000	18696000	14571000	13618000	0	0	0	0	0	3797500	16486000	0	402650000	177440000	132480000	126970000	102840000
AT4G34620.1	65343000	204100000	13318000	570020000	221180000	664900000	113710000	52201000	27565000	0	109550000	492530000	92269000	46876000	181200000	0	126840000	37596000	0	0	0	0	47408000	0	0	0	0	0	0	0	0	0	0	0	15557000	0	0	0	0	3620900
AT4G34670.1	20590000	0	8187800	0	594490000	20100000	27021000	22180000	0	165860000	294300000	23597000	0	0	16162000	0	714930000	61324000	16891000	110440000	0	616140000	41779000	74911000	132820000	149190000	0	218970000	0	0	31362000	244150000	874920000	526850000	13884000	0	12198000	18346000	272900000	551710000
AT4G34730	5529300	0	0	0	95259000	0	60286000	0	0	0	0	0	44078000	8894600	0	0	0	0	8410000	0	0	0	0	6128300	0	0	0	0	0	0	0	0	0	0	0	0	0	0	0	0
AT4G34870	172980000	17862000	31120000	24993000	68184000	34560000	74198000	51138000	30516000	0	0	27934000	84401000	53680000	33807000	48253000	0	43054000	94910000	0	40566000	0	59397000	159180000	122050000	62972000	93538000	0	121260000	88402000	0	0	61915000	84228000	85157000	128580000	107830000	119220000	89531000	103270000
AT4G35000	4142700	0	0	0	4421400	0	0	0	0	0	0	0	6054600	0	0	0	0	0	0	0	0	0	0	0	0	0	0	0	0	0	0	0	0	0	0	0	0	0	0	0
AT4G35090	37355000	21219000	35286000	0	74915000	43764000	19674000	17370000	0	0	0	44749000	32630000	25664000	0	15496000	0	49875000	27529000	0	11483000	0	28708000	37029000	12691000	13644000	23094000	0	0	0	0	0	0	7269100	0	18194000	20740000	21329000	32007000	28934000
AT4G35250	0	0	0	0	8186100	0	12826000	0	0	0	0	8194100	0	0	0	0	0	0	0	0	0	0	0	0	0	0	0	0	0	0	0	0	0	0	0	0	0	0	0	0
AT4G35310	10692000	0	0	0	0	0	0	0	0	0	0	6463600	0	0	0	0	0	0	2928800	0	0	0	0	0	0	0	0	0	0	0	0	0	0	0	0	32220000	0	0	4208100	10630000
AT4G35490.1	0	0	0	0	0	0	0	0	0	0	14022000	0	0	0	0	0	0	0	0	0	0	0	0	43604000	0	0	0	0	0	0	0	0	0	0	0	0	18336000	0	0	0
AT4G35630	43185000	0	11143000	11775000	9546300	12585000	10867000	23534000	19882000	0	0	13639000	13071000	21006000	8903800	12978000	0	20913000	14886000	0	0	0	0	8383000	10302000	0	7401300	0	0	0	0	0	0	16288000	0	14330000	8865400	6566000	17559000	18780000
AT4G35790	3195200	0	0	0	0	0	3046700	0	0	0	0	0	4908300	0	0	0	0	0	0	0	0	0	0	3212600	0	2211200	0	0	0	0	0	0	2696500	3765600	0	23638000	0	0	0	3769400
AT4G35830	159030000	0	17134000	0	20776000	20859000	41576000	53200000	33855000	0	0	37948000	42435000	52494000	16498000	29585000	0	69365000	77487000	0	28370000	0	53651000	63746000	41834000	37514000	33882000	0	19332000	0	0	0	34931000	42584000	58323000	102130000	51543000	44330000	42699000	101140000
AT4G35860	0	0	0	0	0	0	0	0	0	0	0	0	0	0	0	0	0	0	3843300	0	0	0	0	4789100	0	0	0	0	0	0	0	0	0	3291600	0	0	0	3017800	0	2492200
AT4G36130.1	313040000	0	207980000	0	199940000	0	0	227440000	285490000	61777000	170100000	0	27914000	184280000	93182000	0	181870000	20489000	817450000	394650000	0	172520000	0	495360000	321520000	601450000	0	0	0	0	158480000	261240000	452450000	75015000	0	23939000	790080000	130200000	192830000	176560000
AT4G36195	1608600	0	5614400	0	5050200	0	6160100	0	0	0	0	0	0	0	0	0	0	0	6627100	0	0	0	0	5033800	5890700	0	0	0	0	0	0	0	5559800	0	0	5398900	6989000	6961600	6278600	5787200
AT4G36250	504000	0	0	0	5320000	0	0	0	0	0	0	3433300	8860300	0	0	0	0	0	0	0	0	0	0	0	0	0	0	0	0	0	0	0	0	0	0	3276900	0	0	0	0
AT4G36420.1	0	0	0	0	6602100	0	0	0	0	0	5513500	0	0	0	0	0	12917000	3736600	0	0	0	0	0	22006000	11835000	14624000	0	0	0	0	0	0	0	0	0	0	11680000	0	0	12642000
AT4G36430	5642600	0	0	0	0	0	0	0	0	0	0	0	0	0	0	0	0	0	3187500	0	0	0	0	0	2475900	0	0	0	0	0	0	0	0	0	0	0	0	0	0	0
AT4G36680	56316000	0	0	0	0	0	0	27201000	0	0	0	17338000	0	37341000	0	0	0	24586000	0	0	0	0	0	5204700	222940000	27036000	8480300	0	6951500	0	0	0	0	8124800	0	6560500	47762000	112540000	10514000	24282000
AT4G36760	23565000	0	7556200	0	8033400	6807100	10305000	9729000	11743000	0	0	7226800	10765000	13712000	13454000	16973000	0	12504000	11126000	0	0	0	14876000	8452500	5923000	0	6836100	0	0	0	0	0	8403800	8154000	0	9176000	12801000	7976200	12809000	13220000
AT4G37070	3341900	0	0	0	0	0	0	0	0	0	0	0	0	0	0	0	0	0	12609000	0	0	0	0	5633900	4427400	0	4279500	0	0	0	0	0	0	4204000	0	8369000	0	0	0	6423900
AT4G37640	0	0	0	0	0	0	0	0	0	0	0	0	0	0	0	0	0	0	0	0	0	0	0	0	0	0	0	0	0	0	0	0	0	0	0	18645000	0	2844000	0	6321500
AT4G37800	1345700	0	0	0	12580000	9020400	10463000	0	0	0	0	9205700	0	0	0	0	0	0	0	0	0	0	0	0	0	0	0	0	0	0	0	0	0	0	0	9336300	0	0	0	0
AT4G37870	138030000	0	35221000	54059000	60373000	49671000	64251000	65603000	43227000	41576000	0	68465000	95897000	95752000	71760000	78213000	0	93265000	71483000	0	0	0	48953000	70508000	39508000	38236000	46683000	0	84545000	0	0	0	51188000	48949000	76706000	57891000	78013000	86981000	65234000	67232000
AT4G37910	99188000	0	0	0	16724000	0	21997000	0	0	0	0	18697000	17649000	30701000	0	0	0	32872000	11413000	0	0	0	0	23589000	28785000	0	0	0	20736000	0	0	0	0	15456000	0	65480000	47411000	45111000	31884000	30732000
AT4G37930	12297000	57337000	113140000	79704000	247500000	184660000	186940000	107140000	82230000	14362000	91729000	225650000	84675000	76302000	28552000	78136000	0	94718000	6255500	0	0	0	0	15731000	13506000	0	29686000	0	0	0	0	0	0	0	0	0	0	8840900	0	0
AT4G38220	81617000	0	26566000	0	25612000	16887000	25951000	0	0	0	0	28318000	18097000	0	0	23277000	0	19251000	39336000	0	14522000	0	23895000	37541000	20888000	19322000	22403000	0	33990000	0	0	0	28610000	21607000	0	39240000	40704000	17337000	51402000	42336000
AT4G38510	7848700	0	0	0	91512000	5226800	82206000	15954000	5608300	0	0	0	123970000	51236000	13190000	0	0	0	41520000	0	9437600	0	0	23356000	0	0	7895600	0	0	0	0	0	0	18412000	0	34366000	19797000	15758000	0	12344000
AT4G38630	23571000	0	0	0	11074000	0	21231000	0	0	0	0	9562000	22680000	11005000	0	0	0	6967000	7384700	0	0	0	0	10080000	8496900	0	0	0	0	0	0	0	9890800	7680800	0	38346000	19555000	14115000	12166000	16793000
AT4G38740	28384000	0	0	0	15060000	8389100	0	0	0	0	0	6573400	0	0	0	0	0	0	40918000	0	21224000	0	18274000	33426000	43340000	0	27919000	0	0	0	0	0	11227000	0	0	17443000	31546000	27554000	17419000	21012000
AT4G38920	5607800	0	0	0	231570000	0	116890000	19111000	8368700	0	0	0	56788000	22779000	8617900	0	0	8901700	110480000	0	0	0	0	113910000	22291000	10070000	17155000	0	0	0	0	0	11426000	0	0	21726000	7927200	12570000	0	0
AT4G38970	0	244730000	450010000	305150000	602660000	492310000	267510000	405550000	284590000	206720000	372760000	362090000	218800000	209240000	107350000	272560000	0	404300000	0	0	0	0	0	16832000	6053500	0	3736000	0	0	0	0	0	1867400	0	0	0	0	0	0	0
AT4G39040	0	0	66218000	0	0	0	0	73728000	0	0	0	0	13728000	58848000	0	0	0	0	0	0	0	0	0	0	6294900	0	0	0	0	0	0	0	0	0	0	0	0	0	0	0
AT4G39080	34651000	0	26570000	0	369860000	16245000	226790000	57925000	14731000	0	11559000	21111000	238370000	91740000	31137000	44168000	0	49241000	148710000	0	7850900	0	0	201240000	58873000	25642000	35967000	0	28307000	128300000	0	0	69612000	130490000	63996000	72639000	35115000	30998000	16864000	11014000
AT4G39090	35739000	0	0	0	3276400	0	15994000	0	0	0	0	8889700	0	0	0	0	0	0	24224000	0	0	0	0	16606000	7099000	0	5027400	0	7154700	0	0	0	8226600	21971000	0	136420000	6009200	8588200	8686800	27865000
AT4G39200.2;AT4G39200.1	0	0	0	0	0	6325300	0	0	0	0	7612400	0	0	0	0	0	0	11417000	0	0	0	0	12002000	0	0	5968200	0	0	0	0	0	0	48538000	0	2219700	0	0	0	0	0
AT4G39260	62112000	11108000	25458000	0	30576000	13363000	25861000	17335000	13133000	0	0	18552000	28699000	24509000	0	23517000	0	13903000	0	0	0	0	36551000	0	37981000	35941000	35604000	0	45466000	0	0	0	17464000	27800000	0	0	42151000	45788000	31291000	22014000
AT4G39330	0	0	0	0	11184000	0	7023900	0	0	0	0	0	6272900	0	0	0	0	0	0	0	0	0	0	0	0	0	0	0	0	0	0	0	0	0	0	0	0	0	0	0
AT4G39660	45072000	0	9549500	0	10781000	0	7439600	0	0	0	0	9572000	7553000	9405800	0	0	0	9416200	17134000	0	0	0	0	0	9099000	0	0	0	0	0	0	0	7535300	9351800	0	9241900	14942000	23482000	13698000	20293000
AT4G39730	28103000	0	0	0	18863000	0	0	0	0	0	0	13287000	14621000	0	0	0	0	0	13994000	0	0	0	0	25658000	12581000	0	0	0	0	0	0	0	0	0	0	13261000	28235000	27500000	0	19404000
AT4G39880.1	0	16333000	0	0	21879000	0	46436000	0	0	0	24377000	0	75124000	0	0	0	10700000	13690000	0	0	0	0	0	138730000	0	28600000	0	18981000	0	0	0	0	0	0	9390400	149100000	281250000	0	21739000	21323000
AT4G39980	700560000	0	0	0	10118000	0	8852000	0	0	0	0	35858000	28078000	0	0	0	0	9206600	12324000	0	0	0	0	57583000	46653000	9611400	3832200	0	0	0	0	0	6994500	4757000	0	508310000	49795000	47646000	89690000	165120000
AT5G01410	11457000	0	12236000	0	18343000	0	0	0	0	0	0	18563000	14372000	18786000	12199000	0	0	0	13578000	0	0	0	0	0	6263400	0	0	0	0	0	0	0	0	0	0	9871600	9818700	13445000	0	0
AT5G01530	1953800	0	0	0	54130000	32071000	82800000	29752000	16916000	0	0	34603000	140940000	54310000	0	0	0	55670000	0	0	0	0	0	3823100	0	0	0	0	0	0	0	0	0	0	0	0	0	0	0	0
AT5G01600	20719000	111740000	62648000	70779000	40114000	0	16041000	38232000	0	0	0	0	116780000	560290000	673980000	399020000	0	31319000	270800000	140620000	202980000	0	0	191790000	293800000	165220000	184490000	0	0	0	228300000	152770000	120420000	39878000	0	120910000	487890000	979650000	168410000	56491000
AT5G01650	0	0	0	0	11961000	0	4990700	0	0	0	0	0	0	0	0	0	0	0	0	0	0	0	0	4376100	0	0	0	0	0	0	0	0	0	0	0	0	0	0	0	0
AT5G02100	3585800	0	0	0	0	0	0	0	0	0	0	0	0	0	0	0	0	0	0	0	0	0	0	0	0	0	0	0	0	0	0	0	0	0	0	16203000	0	0	0	4633800
AT5G02240	3616400	0	0	0	0	0	10882000	0	0	0	0	0	15382000	8055700	0	0	0	0	0	0	0	0	0	0	0	0	0	0	0	0	0	0	0	0	0	3282100	0	0	0	0
AT5G02450.1	496370000	0	400290000	0	139570000	0	38213000	157550000	624770000	287270000	70583000	0	62285000	642080000	190830000	0	158690000	0	585340000	294200000	0	128480000	0	178980000	593030000	360210000	0	71297000	0	115480000	1248600000	116760000	286010000	272400000	0	48441000	575790000	79032000	147400000	210700000
AT5G02490.1;AT1G56410.1	0	0	0	3157200	0	7253300	0	0	0	0	0	0	0	0	0	0	0	0	0	0	0	0	0	0	0	0	0	0	0	0	0	0	0	0	5364000	0	0	0	0	0
AT5G02500.1;AT5G02500.2	35668000	45842000	45414000	80432000	88297000	74174000	96402000	113380000	0	102450000	86883000	86442000	122210000	46986000	98048000	0	129610000	75318000	18964000	48281000	0	75173000	76823000	58085000	89619000	84740000	0	80961000	0	72176000	73855000	111730000	108690000	168370000	68691000	87677000	58193000	61992000	92914000	93635000
AT5G02610.1;AT5G02610.2	115240000	0	99258000	0	71666000	0	0	0	154490000	146150000	0	0	0	0	0	0	81932000	0	163810000	241910000	0	0	0	38851000	116790000	129020000	0	0	0	0	0	83768000	101660000	0	0	0	174400000	0	33663000	68817000
AT5G02790	0	0	0	0	13975000	7176400	0	0	0	0	0	8139800	9315300	7544700	0	0	0	5662800	0	0	0	0	0	0	4023900	0	0	0	0	0	0	0	0	0	0	0	0	0	0	0
AT5G02870.2;AT5G02870.1	1458900000	35162000	861790000	11464000	750390000	13206000	93344000	1551500000	1522200000	777880000	439910000	17511000	220040000	1153200000	489160000	0	724920000	51631000	1849700000	1705700000	0	1027100000	10551000	682910000	1896200000	2040600000	0	369890000	0	0	2264900000	1309600000	1175400000	718680000	13042000	59907000	2057300000	336320000	392490000	792930000
AT5G02960.1;AT3G09680.1	228960000	246930000	98618000	218530000	981790000	598980000	263740000	258050000	101770000	292160000	241610000	484210000	109730000	81192000	120010000	0	1247900000	1318000000	274060000	582220000	0	527220000	2314000000	544250000	418420000	991610000	0	380380000	566490000	56700000	47777000	401760000	883830000	939800000	284050000	56215000	40702000	76889000	395660000	1009400000
AT5G03290	17168000	0	0	0	0	0	0	0	0	0	0	0	0	0	0	0	0	5150700	9524300	0	0	0	0	7342600	0	0	0	0	0	0	0	0	0	0	0	10765000	0	0	0	3712100
AT5G03300.1	0	0	0	0	0	10059000	0	0	0	0	15943000	0	0	0	0	0	9456400	13111000	0	0	0	0	10586000	9608400	0	7325500	0	0	0	0	0	0	0	0	13132000	0	0	0	12549000	18618000
AT5G03630	86368000	0	16200000	9720500	25488000	16820000	25836000	36030000	15385000	0	0	18791000	22199000	22563000	0	18285000	0	16416000	45766000	0	18012000	0	30376000	55209000	37421000	19082000	36203000	0	43206000	67260000	0	0	23650000	26209000	13916000	39027000	25778000	44287000	32551000	37236000
AT5G03850.1;AT3G10090.1	185630000	505540000	233470000	230360000	615260000	538270000	216190000	277370000	0	209230000	295890000	416500000	142670000	0	114040000	0	715780000	2463700000	169450000	390450000	0	1006200000	1532800000	961870000	413170000	600420000	0	310100000	0	0	0	437620000	1133100000	806260000	286330000	94070000	46517000	89986000	298330000	626050000
AT5G04140	0	19734000	46141000	6290900	149920000	102000000	77717000	47590000	22168000	0	23640000	90567000	45300000	47527000	16215000	24146000	0	110850000	0	0	0	0	0	0	0	0	0	0	0	0	0	0	0	0	0	0	0	0	0	0
AT5G04430.1;AT5G04430.2	0	0	0	3735400	0	0	0	0	0	0	3943000	4492400	3911200	0	0	0	0	4800200	0	0	0	0	0	3719600	0	0	0	0	0	0	0	0	0	0	4314400	0	8092200	0	0	0
AT5G04590	112180000	0	28946000	23214000	48860000	35514000	44882000	39001000	16077000	0	0	42969000	34048000	56535000	35255000	30925000	0	33746000	61853000	0	0	0	34912000	57127000	58258000	30517000	41396000	0	69260000	0	0	0	0	23882000	0	39801000	56983000	81573000	44902000	61611000
AT5G04600	0	0	0	0	0	0	0	0	0	0	0	0	0	0	0	0	0	9846500	0	0	0	0	0	0	7172600	0	0	0	0	0	0	0	0	0	0	0	0	15300000	0	0
AT5G04740	9687600	0	0	0	0	0	0	0	0	0	0	0	0	0	0	0	0	0	0	0	0	0	0	9282200	5746700	0	0	0	0	0	0	0	0	0	0	10633000	0	8845300	5745200	4356900
AT5G04800.4;AT5G04800.3;AT5G04800.2;AT5G04800.1	0	0	0	0	24606000	0	16317000	0	0	0	14200000	0	0	0	0	0	83269000	93361000	17749000	45957000	0	0	144710000	0	22075000	66768000	0	0	15814000	0	0	0	1549400	57123000	0	0	0	0	29421000	39243000
AT5G05010	15742000	0	0	0	20753000	0	16434000	15312000	0	0	0	11538000	23239000	9465800	15888000	0	0	7932300	5974600	0	0	0	0	15052000	9223100	6759200	10588000	0	0	0	0	0	0	5560900	0	39328000	11181000	16820000	13236000	13653000
AT5G05470.1	0	0	0	0	0	0	0	0	0	0	5647700	0	0	0	0	0	0	0	0	0	0	7768200	0	3032400	0	0	0	0	0	0	0	0	0	0	17963000	0	3910000	0	8766500	5390200
AT5G05780	0	0	0	0	16919000	0	22334000	0	0	0	0	0	35033000	0	0	0	0	0	0	0	0	0	0	21232000	0	0	0	0	0	0	0	0	0	0	0	44842000	0	10550000	8956200	0
AT5G06290	5087600	0	9772800	0	64780000	28817000	32774000	69707000	0	44051000	44577000	0	34826000	44934000	0	0	0	44360000	0	0	0	0	0	0	0	0	0	0	0	0	0	0	0	0	0	0	0	0	0	0
AT5G06320	46441000	0	0	0	8138000	0	0	7096900	0	0	0	8617800	7044000	5818800	0	0	0	3182200	33572000	0	0	0	0	62791000	59954000	0	27624000	0	46382000	47159000	0	0	10280000	0	12541000	30811000	7821500	7734100	10403000	16641000
AT5G06360.1	0	0	0	0	0	0	0	17322000	0	0	0	0	0	45152000	52744000	0	8793800	0	0	0	0	0	0	11140000	35845000	12587000	0	0	0	0	0	16891000	0	0	0	0	34392000	14533000	12907000	0
AT5G06860	13580000	0	0	0	0	0	11883000	8433900	0	0	0	0	8070500	0	0	0	0	0	8476600	0	0	0	0	8030200	5660200	0	0	0	0	0	0	0	0	0	0	43254000	5181300	0	0	16063000
AT5G07030	54962000	0	4412200	0	33522000	11600000	25620000	0	0	0	0	16046000	11656000	5881700	0	0	0	7683600	42248000	0	7114200	0	17507000	96390000	37388000	8241300	14355000	0	39471000	0	0	0	0	7413600	0	100890000	10637000	18432000	31667000	32418000
AT5G07090.2;AT5G07090.1;AT2G17360.1;AT2G17360.2	0	18954000	0	0	52526000	58272000	0	8791100	0	0	36837000	45306000	12246000	0	0	0	63037000	188750000	0	23776000	0	0	166440000	76909000	17771000	0	0	42205000	0	0	0	39102000	143070000	70450000	79838000	0	0	0	0	33785000
AT5G07350	31905000	0	0	0	5834200	6115900	7806000	14252000	0	0	0	17276000	0	6884000	0	0	0	10671000	11757000	0	0	0	0	18781000	8132700	7791300	11081000	0	0	0	0	0	10923000	5819400	0	77908000	24444000	16464000	31888000	16103000
AT5G07440	133520000	37037000	78070000	34556000	68008000	33462000	61747000	45562000	42405000	0	73519000	27730000	57700000	72056000	42588000	69885000	0	21574000	145270000	17052000	37136000	0	71015000	108120000	105600000	49335000	63220000	0	121580000	287880000	0	45031000	103510000	64734000	0	188920000	221880000	283560000	190240000	138740000
AT5G08280	0	0	0	0	10324000	9164000	0	9684800	0	0	0	4970300	0	0	0	0	0	0	0	0	0	0	0	0	0	0	0	0	0	0	0	0	0	0	0	0	0	0	0	0
AT5G08300	14534000	0	0	0	11479000	6866800	11584000	0	0	0	0	0	8628300	10920000	0	0	0	7137800	14786000	0	0	0	15599000	0	7326300	8210300	0	0	0	0	0	0	0	0	0	10755000	0	6705400	10508000	8883200
AT5G08380	0	0	0	0	3727500	0	4629200	0	0	0	0	4534600	0	0	0	0	0	2490900	0	0	0	0	0	0	0	0	0	0	0	0	0	0	0	0	0	3402600	0	0	0	0
AT5G08420.1	0	0	0	0	0	0	0	0	0	0	0	0	0	6600700	0	0	8093600	0	0	0	0	0	0	0	0	0	0	0	0	0	0	0	0	0	5939500	0	8951400	0	0	0
AT5G08530	21150000	0	0	0	77502000	5045800	27806000	0	0	0	0	7539000	88092000	8432900	0	0	0	15547000	25767000	0	0	0	6004200	92730000	22312000	0	7941800	0	0	0	0	0	9034400	2726500	0	45981000	21679000	20378000	8575300	13207000
AT5G08690	2339800000	231000000	584000000	322020000	5040000000	300140000	3108000000	967880000	427600000	314430000	294590000	525490000	4377100000	1355200000	667010000	738860000	0	479600000	1206600000	136330000	314990000	10477000	609870000	4573100000	1362800000	439610000	692110000	0	797850000	1409700000	80644000	257720000	421970000	485560000	344630000	2368700000	2844700000	2291800000	1457500000	1539800000
AT5G09510.1;AT5G09510.2	0	0	0	0	0	15894000	0	0	0	0	11291000	13419000	5505900	0	0	0	0	0	0	0	0	25941000	0	31387000	0	10428000	0	0	0	0	0	0	31712000	20021000	6614100	0	0	0	0	0
AT5G09590	49766000	0	12197000	0	22101000	13185000	14509000	17735000	0	0	0	13243000	17747000	19785000	16130000	15710000	0	14230000	23418000	0	0	0	28821000	18195000	21232000	14538000	18268000	0	35809000	0	0	0	13496000	11574000	0	18984000	23312000	15672000	17201000	21412000
AT5G09650	12708000	0	30282000	0	33745000	16619000	24239000	0	0	0	0	11833000	11052000	15606000	0	0	0	19006000	9978400	0	0	0	0	13060000	10611000	0	8415400	0	0	0	0	0	0	0	0	8881400	16411000	13301000	12569000	11181000
AT5G09660.2;AT5G09660.1;AT5G09660.3;AT5G09660.4	0	23296000	14799000	37738000	27650000	44139000	36900000	0	0	29674000	35595000	35244000	35100000	0	24388000	0	41745000	0	0	0	0	0	0	0	0	0	0	0	0	0	0	0	0	0	0	0	0	0	0	0
AT5G09810	67203000	0	0	0	30670000	19977000	40657000	35458000	0	0	30916000	36966000	23198000	24555000	0	0	0	23336000	21237000	0	0	0	10432000	50275000	33011000	0	19821000	0	45608000	0	0	0	17595000	0	0	127420000	15108000	16634000	44358000	66447000
AT5G09900	40309000	0	3932900	0	37536000	0	42818000	0	8826700	0	0	11363000	77200000	26422000	0	0	0	11436000	20029000	0	0	0	0	35901000	12928000	0	0	0	8348100	0	0	0	6354600	7411300	0	113880000	16911000	19390000	15359000	23105000
AT5G10160	0	0	0	0	0	0	3707600	0	0	0	0	0	0	0	0	0	0	0	3004800	0	0	0	0	4597200	0	0	0	0	0	0	0	0	0	0	0	5106800	0	0	0	0
AT5G10360.1;AT5G10360.2	178670000	186340000	146340000	150580000	667600000	440370000	227140000	133110000	72769000	531820000	483840000	366930000	139330000	47215000	48787000	0	561170000	1942200000	100120000	370230000	0	835830000	964800000	921610000	238340000	466400000	0	260970000	0	186370000	82815000	274140000	1224100000	592290000	226720000	134650000	106320000	32973000	176180000	680240000
AT5G10450	32058000	0	0	0	23554000	11242000	25413000	0	0	0	0	30797000	11160000	0	0	0	0	17936000	19240000	0	0	0	0	14879000	20691000	0	10345000	0	0	0	0	0	0	0	0	10223000	16868000	14007000	0	19791000
AT5G10540	11325000	0	7974200	0	8969000	5672900	5620400	0	0	0	0	5886900	0	0	0	0	0	0	12502000	0	0	0	7763000	9833400	8530800	0	8195400	0	0	0	0	0	0	7910300	0	11359000	0	13026000	0	8226300
AT5G10860	7031800	0	5685400	0	6805100	0	18618000	0	0	0	0	6217100	0	0	0	0	0	3998900	16194000	0	0	0	0	25879000	6431900	0	0	0	0	0	0	0	0	9895300	0	10961000	12744000	0	8433500	10640000
AT5G11200.1;AT5G11170.1;AT5G11200.3;AT5G11200.2;AT5G11170.2	0	0	0	8718200	0	11998000	0	0	0	0	0	16456000	0	0	0	0	13824000	11512000	0	0	0	0	11991000	9721800	0	0	0	0	0	0	0	0	0	0	12417000	0	17933000	0	12329000	0
AT5G11520	18979000	0	0	0	5503400	0	13235000	0	0	0	0	14003000	10388000	0	0	13071000	0	15020000	6432900	0	0	0	0	6561500	6719200	0	0	0	0	0	0	0	0	9910600	0	12929000	8571400	14351000	13809000	14588000
AT5G11560	22891000	0	0	0	5159300	0	5713100	0	0	0	0	2026300	4768400	3736100	0	0	0	2974400	2624800	0	0	0	0	10833000	3159200	0	0	0	0	0	0	0	0	1607700	0	91993000	3053000	3310600	4807200	11909000
AT5G11670	810670000	59799000	220340000	74440000	229150000	145220000	229130000	236030000	254360000	181520000	255860000	295790000	151570000	138040000	126840000	206910000	0	224990000	299980000	22410000	142210000	0	428810000	316740000	218480000	159140000	186350000	0	245080000	209730000	31147000	0	250850000	219120000	271590000	261640000	301520000	268580000	347060000	397200000
AT5G11770	6091200	0	0	0	12267000	0	0	0	0	0	0	7230300	10806000	0	0	0	0	0	0	0	0	0	0	13239000	0	0	0	0	0	0	0	0	0	0	0	44169000	0	0	0	9254600
AT5G11880	2037700	0	0	0	4260800	0	4787500	0	0	0	0	0	4309800	0	0	0	0	0	0	0	0	0	0	6530400	0	0	0	0	0	0	0	0	0	0	0	8540500	0	0	0	0
AT5G12140	100450000	0	12113000	11175000	32252000	15519000	26647000	22724000	0	0	0	27179000	30218000	26643000	0	0	0	8887000	72334000	0	21885000	0	0	47441000	50079000	0	31307000	0	21689000	0	0	0	34485000	52128000	0	50542000	180530000	133970000	41700000	52897000
AT5G12470	17990000	0	0	0	2196400	0	4411900	0	0	0	0	0	6298800	2218600	0	0	0	1619400	0	0	0	0	0	3952000	1994600	0	0	0	0	0	0	0	0	2207500	0	121710000	1627100	5951800	1982900	5992500
AT5G12940	2729900	0	0	0	0	0	0	0	0	0	0	0	0	0	0	0	0	0	0	0	0	0	0	0	0	0	0	0	0	0	0	0	0	25304000	0	6493900	0	0	0	0
AT5G13420	416790000	0	18715000	7717500	31701000	10504000	49521000	11664000	36483000	0	11986000	30494000	57915000	47909000	35297000	38501000	0	34064000	76337000	0	22833000	0	36177000	182620000	102690000	37218000	56074000	0	78732000	69444000	58662000	0	49411000	53954000	26174000	543520000	189730000	182610000	182510000	222930000
AT5G13430	15306000	0	0	0	11417000	0	0	0	0	0	0	9234700	0	0	0	0	0	0	12158000	0	0	0	0	11008000	11863000	0	0	0	0	0	0	0	0	14539000	0	21912000	0	10328000	0	12041000
AT5G13450	56255000	0	9998200	0	245100000	8411800	147930000	52686000	10817000	0	0	11285000	289830000	84731000	21975000	19008000	0	24138000	51326000	0	0	0	0	240420000	47943000	35594000	25681000	0	48448000	33143000	0	0	20843000	31796000	0	109020000	40680000	29779000	32208000	57843000
AT5G13510.1	304890000	2843000000	1353400000	44589000	361560000	36298000	1893200000	823760000	129230000	37355000	322520000	52897000	1980700000	233080000	293850000	0	347590000	24153000	0	0	0	0	0	204150000	19722000	33204000	0	0	0	0	0	0	0	0	0	84842000	50793000	12503000	0	0
AT5G13780	6179900	0	0	0	0	0	0	0	0	0	0	0	0	0	0	0	0	0	0	0	0	0	0	0	0	0	0	0	0	0	0	0	0	0	0	15260000	0	0	0	4793600
AT5G13850.1	0	0	0	0	0	0	0	0	0	0	0	0	5910700	0	0	0	4161400	5406100	0	0	0	0	3566500	0	0	0	0	0	0	0	0	0	0	0	0	0	4293400	0	0	0
AT5G14030	4605300	0	0	0	0	0	9545700	0	0	0	0	0	7766000	0	0	0	0	0	5669200	0	0	0	0	11880000	0	0	0	0	12246000	0	0	0	0	6312800	0	12184000	0	14017000	0	0
AT5G14040	141360000	0	0	0	50475000	11858000	98617000	33242000	12926000	0	0	43867000	91431000	37993000	0	0	0	34401000	32806000	0	0	0	15810000	90408000	37053000	24256000	18648000	0	25888000	0	0	0	9979300	34277000	10781000	333760000	27996000	47342000	44603000	99700000
AT5G14200	94375000	0	16230000	0	28804000	17940000	16749000	0	0	0	0	12460000	0	18345000	0	0	0	11242000	27159000	0	0	0	25907000	53688000	30898000	28384000	21444000	0	36342000	0	0	0	12941000	0	0	32996000	28953000	29109000	32376000	30618000
AT5G14320.1;AT5G14320.2	132510000	171540000	48252000	715060000	326570000	1006300000	191850000	69776000	21022000	16720000	210000000	562300000	100620000	36206000	239740000	0	281240000	60079000	0	0	0	0	115050000	0	0	0	0	0	0	0	0	7590800	0	0	7774500	0	0	0	2703500	0
AT5G14520.1	0	0	0	0	0	0	0	0	0	0	8565300	5835000	47846000	125050000	80201000	0	38728000	0	0	0	0	0	0	38889000	140850000	29397000	0	0	0	0	0	43270000	23785000	0	12844000	15117000	136070000	30813000	15778000	4931300
AT5G14590	6219600	0	0	0	6090200	0	8208200	0	0	0	0	5852200	5498600	0	0	0	0	7182800	5148700	0	0	0	0	6866500	3481200	0	0	0	0	0	0	0	0	3994200	0	6397500	0	3796000	0	4471700
AT5G14740	0	72236000	131500000	72514000	341180000	131620000	136190000	94065000	82360000	83528000	156980000	226480000	80381000	78143000	40916000	94797000	0	89520000	0	0	0	0	0	0	0	0	0	0	0	0	0	0	0	0	0	0	0	0	0	0
AT5G14780	17787000	13015000	32500000	8166200	123380000	59811000	310940000	256010000	104450000	26044000	150540000	471370000	137850000	143290000	111000000	119520000	0	261980000	5929800	0	0	0	0	6352100	3478600	0	0	0	0	0	0	0	0	0	0	10930000	8219200	15819000	0	2616200
AT5G14910	14650000	69480000	93992000	20346000	405250000	193880000	341700000	117260000	21816000	0	32606000	57732000	303390000	117770000	52701000	111260000	0	268960000	14343000	0	0	0	16372000	56342000	4239300	0	0	0	17891000	0	0	0	8297600	10322000	0	0	0	0	0	3268700
AT5G15090	140860000	0	0	5887600	39824000	28383000	31514000	20107000	0	0	29038000	17334000	35383000	27900000	0	0	0	52812000	32062000	0	0	0	12227000	38225000	22995000	15307000	15956000	0	45726000	160020000	0	0	56295000	57537000	57838000	113060000	41082000	30795000	51432000	62724000
AT5G15200.1;AT5G15200.2	212950000	188460000	117670000	147570000	509470000	671410000	132670000	90358000	86779000	199310000	538670000	434040000	52383000	32836000	102490000	0	767580000	1415700000	297700000	567150000	0	724230000	1542200000	799390000	537830000	825680000	0	88564000	0	0	0	170630000	897960000	476590000	339940000	63969000	64231000	56335000	468380000	910210000
AT5G15220.1;AT2G16930.3;AT2G16930.2;AT2G16930.1	0	0	0	0	12046000	0	0	0	0	0	12427000	0	21597000	0	0	0	0	0	0	0	0	26924000	0	88127000	13211000	0	0	0	0	0	0	15398000	3499200	0	0	21849000	57501000	0	8106200	19089000
AT5G15400	1841200	0	0	0	0	0	0	0	0	0	0	0	0	0	0	0	0	0	0	0	0	0	0	0	0	0	0	0	0	0	0	0	0	0	0	15187000	0	0	0	3077500
AT5G15520.1	0	0	0	0	0	0	0	0	0	0	0	0	0	0	0	0	11869000	63165000	0	17711000	0	14683000	81989000	16974000	12329000	12437000	0	0	0	0	0	0	0	0	0	0	0	0	10149000	0
AT5G15550	13212000	0	0	0	0	0	0	0	45672000	0	0	5270400	6180000	42671000	46890000	61781000	0	36606000	0	0	0	0	0	0	11902000	57617000	18307000	0	0	0	0	38676000	38086000	11203000	0	6681400	12096000	115940000	31558000	15919000
AT5G15650	36203000	0	0	0	12109000	7844300	15896000	0	0	0	0	9600000	0	16960000	0	0	0	17795000	19025000	0	0	0	37622000	14503000	18868000	0	19489000	0	0	0	0	0	13919000	17126000	0	18863000	24923000	15224000	24800000	20622000
AT5G15970	0	0	0	0	0	0	17006000	0	0	0	0	0	15312000	18590000	0	0	0	0	0	0	0	0	0	0	0	0	0	0	0	0	0	0	0	0	0	0	0	0	0	0
AT5G16050	27766000	0	6827400	0	4363300	5967000	0	0	0	0	0	8731100	0	0	0	0	0	8162700	7045700	0	0	0	0	23430000	16386000	0	10073000	0	0	0	0	0	0	0	0	17824000	11481000	8726100	0	10564000
AT5G16130.1	222140000	425780000	200750000	157540000	837070000	773120000	411920000	251380000	41746000	509620000	401770000	603170000	191530000	105830000	116070000	0	1172900000	2489200000	183450000	575440000	0	1172800000	2014700000	726130000	630300000	684640000	0	469490000	799710000	73099000	174310000	848030000	2000500000	1314900000	283330000	102850000	62734000	96978000	606670000	1397000000
AT5G16440	12000000	0	0	0	0	0	0	0	0	0	0	0	0	0	0	0	0	0	0	0	0	0	0	0	0	0	0	0	0	0	0	0	0	0	0	9959900	0	0	0	7472100
AT5G16450	14360000	0	0	0	0	0	5189100	0	0	0	0	4577600	0	0	0	0	0	0	10062000	0	0	0	11071000	8875700	4830600	0	0	0	0	0	0	0	0	0	0	0	8304900	6056000	0	7346700
AT5G16510	3893000	0	0	0	0	0	0	0	0	0	0	0	0	0	0	0	0	0	9009000	0	0	0	13614000	8430900	5136900	0	7032500	0	0	0	0	0	5886500	0	0	13053000	10983000	7736400	11198000	5253900
AT5G16710	2318500	0	0	0	17130000	0	0	0	0	0	0	0	5770000	0	0	0	0	6874700	0	0	0	0	0	0	0	0	0	0	0	0	0	0	0	0	0	0	0	0	0	0
AT5G16970	0	0	20530000	0	21225000	10718000	18086000	0	0	0	0	17872000	19807000	0	0	15548000	0	17896000	0	0	0	0	0	0	0	0	0	0	0	0	0	0	0	0	0	0	0	0	0	0
AT5G17020	2927800	0	0	0	0	0	0	0	0	0	0	0	0	0	0	0	0	0	0	0	0	0	0	4068900	0	0	0	0	0	0	0	0	0	0	0	16222000	0	0	0	0
AT5G17330	83981000	0	0	0	0	0	0	0	0	0	0	0	0	0	0	0	0	0	64412000	0	21317000	0	33216000	41050000	32088000	23098000	31243000	0	45342000	0	0	0	33786000	50966000	60662000	70140000	31531000	28232000	40414000	54120000
AT5G17380	34823000	0	0	0	11821000	16606000	21189000	0	0	0	0	14697000	25135000	24266000	0	0	0	17392000	8322100	0	0	0	0	12789000	8969600	0	7384400	0	0	0	0	0	0	0	0	42540000	17194000	18092000	11652000	19066000
AT5G17530	6833700	0	0	0	0	0	0	0	0	0	0	0	0	0	0	0	0	0	10219000	0	0	0	0	0	0	0	0	0	0	0	0	0	0	0	0	0	0	7392900	0	0
AT5G17770	22092000	0	0	0	0	0	0	0	0	0	0	0	0	0	0	0	0	0	0	0	0	0	0	0	0	0	0	0	0	0	0	0	0	0	0	52444000	0	0	13253000	33063000
AT5G17820.1	0	0	0	2955000	0	0	0	0	0	0	0	0	0	0	0	0	0	337550000	35125000	65546000	0	96794000	138270000	60500000	31922000	45885000	0	102970000	264700000	0	50112000	73826000	100070000	75645000	362940000	65186000	94505000	114010000	156610000	102160000
AT5G17870.1	94612000	252190000	316740000	0	75408000	0	236300000	0	0	0	16300000	0	0	0	0	0	58235000	0	0	0	0	0	0	0	0	0	0	0	0	0	0	0	0	0	0	2636600	0	0	8217100	0
AT5G17920	852340000	54323000	211950000	133560000	380480000	145420000	257580000	232730000	165480000	102740000	173460000	138450000	262060000	148590000	94064000	190520000	0	314460000	187690000	59347000	99382000	0	146990000	546560000	131380000	175770000	256820000	0	172490000	218460000	40690000	122320000	194650000	158280000	144860000	352770000	167490000	122910000	253760000	358390000
AT5G18170	0	0	6564700	0	9715900	4808800	5606900	7527000	0	0	0	0	0	0	0	0	0	0	7447900	0	0	0	0	6711200	8626100	6097100	5354100	0	0	0	0	0	0	4051900	0	10229000	8387000	11984000	0	0
AT5G18570	0	0	79196000	0	0	0	0	64622000	0	0	0	0	0	57644000	0	0	0	0	0	0	0	0	0	0	0	0	0	0	0	0	0	0	0	0	0	0	0	0	0	0
AT5G18800	1902100	0	0	0	0	0	0	0	0	0	0	0	9424700	0	0	0	0	0	0	0	0	0	0	0	3244700	0	0	0	0	0	0	0	0	0	0	0	0	0	0	0
AT5G19180	3052800	0	0	0	2171100	0	0	0	0	0	0	0	0	0	0	0	0	0	0	0	0	0	0	0	0	0	0	0	0	0	0	0	0	0	0	6834300	0	0	0	0
AT5G19220	0	0	0	0	5100100	0	5703500	0	0	0	0	11141000	0	0	0	0	0	4405800	0	0	0	0	0	0	0	0	0	0	0	0	0	0	0	0	0	0	0	0	0	0
AT5G19440	3387200	0	0	0	11640000	0	11790000	0	0	0	0	0	14259000	0	0	0	0	10108000	17796000	0	0	0	15156000	19741000	14254000	0	0	0	0	0	0	0	0	3516000	0	16755000	16427000	22765000	18289000	16913000
AT5G19510.1	0	0	0	43822000	32661000	55416000	61561000	0	0	34664000	79515000	44831000	56276000	0	0	0	60335000	38832000	0	14267000	0	22121000	34898000	48962000	13768000	30029000	0	25185000	0	0	0	29027000	40719000	27494000	118590000	224230000	155860000	65326000	116110000	95655000
AT5G19550	611000000	0	17205000	9779900	95124000	42938000	127650000	96521000	47085000	16015000	70535000	119090000	215950000	229840000	111600000	158810000	0	227060000	188900000	9856500	59801000	0	144970000	268330000	216560000	110650000	180110000	0	232560000	158160000	28843000	20984000	115430000	126540000	111530000	315860000	327810000	433130000	321860000	316490000
AT5G19760	99659000	0	7249600	0	63546000	24317000	83696000	29307000	0	0	0	34706000	63646000	26262000	0	0	0	18909000	26578000	0	0	0	12239000	55751000	24066000	12287000	16751000	0	30464000	0	0	0	0	29716000	29710000	218330000	25800000	23257000	41914000	48229000
AT5G19780	93738000	0	0	0	55305000	13529000	54917000	26208000	0	0	0	14513000	35173000	19762000	11145000	0	0	18142000	16104000	0	0	0	9487500	46744000	16933000	16585000	14228000	0	27300000	0	0	0	0	19778000	0	145170000	9511800	17767000	21489000	68291000
AT5G19890	5935000	0	0	0	0	0	0	0	0	0	0	0	0	0	0	0	0	0	0	0	0	0	0	0	0	0	0	0	0	0	0	0	0	0	0	18600000	0	0	0	8720300
AT5G19990	83747000	0	0	0	75928000	8480100	95052000	9981200	11482000	0	0	33632000	137830000	17718000	6430400	9132300	0	11147000	20963000	0	0	0	0	60729000	18199000	15535000	11887000	0	38536000	0	0	0	8246800	2287400	5341600	330390000	43761000	20064000	46111000	31021000
AT5G20010	115480000	35367000	47055000	30743000	66123000	37645000	61728000	64012000	31484000	0	56558000	50463000	65248000	47050000	57824000	37927000	0	46889000	90090000	0	33706000	0	70789000	115650000	95249000	41236000	56728000	0	19598000	86083000	0	0	31214000	23694000	44139000	54053000	83818000	106190000	56948000	69582000
AT5G20080	9164200	0	0	0	7795600	0	7127300	0	0	0	0	4928600	0	0	0	0	0	5000700	0	0	0	0	0	9496900	0	0	0	0	0	0	0	0	0	3227600	0	10977000	0	0	7062400	9996800
AT5G20090	11005000	0	0	0	0	0	6830100	0	0	0	0	0	3256600	0	0	0	0	0	0	0	0	0	0	4500400	2753200	0	0	0	0	0	0	0	0	3450200	0	30146000	0	0	3492900	4468000
AT5G20280	0	0	0	0	7047800	0	9039800	0	0	0	0	0	19278000	0	0	0	0	10689000	0	0	0	0	0	0	0	0	0	0	0	0	0	0	0	0	0	0	0	0	0	0
AT5G20290.1;AT5G59240.1	895910000	1018400000	748010000	1327200000	3391700000	2746500000	1814700000	565550000	692160000	2371000000	2247300000	1718600000	805350000	250920000	385450000	0	3239100000	8194700000	872800000	2346800000	0	4259700000	4375800000	4058800000	1201900000	2910500000	0	1229900000	4639900000	1605100000	769530000	1449700000	4674300000	2509200000	1224000000	508770000	637380000	260690000	1537500000	3516300000
AT5G20490	3050400	0	0	0	7776000	0	0	0	0	0	0	0	5928400	0	0	0	0	0	0	0	0	0	0	0	0	0	0	0	0	0	0	0	0	0	0	27145000	0	0	0	0
AT5G20600	3555900	0	0	0	0	0	0	0	0	0	0	0	0	0	0	0	0	0	0	0	0	0	0	0	0	0	0	0	0	0	0	0	0	0	0	0	68048000	65674000	0	19426000
AT5G20630	0	0	6482900	0	7327700	3852200	0	0	0	0	0	0	0	0	0	0	0	0	0	0	0	0	0	0	0	0	0	0	0	0	0	0	0	0	0	0	0	0	0	0
AT5G20720	79233000	57267000	144810000	47924000	212230000	142450000	185700000	111380000	95604000	112590000	93179000	171060000	163250000	183510000	102240000	126930000	0	116510000	54094000	14310000	17449000	0	0	39112000	64783000	23901000	44867000	0	56303000	73276000	0	0	28734000	0	0	29488000	51625000	69716000	24537000	39212000
AT5G20830	640480000	0	0	0	2690900	5436700	23447000	0	0	0	0	28128000	34691000	18899000	0	0	0	45234000	286860000	0	57236000	0	98784000	226530000	187310000	92154000	114950000	0	87628000	116300000	0	0	134610000	93969000	87839000	531640000	353500000	311220000	324100000	340560000
AT5G20890	68100000	0	0	0	29400000	0	35203000	15555000	0	0	0	12580000	60352000	20004000	0	0	0	27714000	17032000	0	0	0	14898000	41407000	18464000	12911000	10092000	0	0	0	0	0	0	8822200	0	88166000	18101000	20482000	16582000	53452000
AT5G20920.3;AT5G20920.1;AT5G20920.2	0	7596900	0	6537800	8830000	9407300	11554000	0	0	0	16708000	14454000	11285000	0	10485000	0	14168000	13692000	0	0	0	9338300	11552000	13483000	13353000	11362000	0	0	0	0	0	7851000	8722400	18484000	6986300	11684000	14432000	9532200	12628000	12084000
AT5G20950	5175300	0	0	0	4422700	3677800	9164000	0	0	0	0	4810500	9776200	6611200	0	0	0	4935300	9130900	0	0	0	0	4651300	3615300	0	0	0	6600300	0	0	0	0	5022400	0	5523700	0	5248500	0	3376700
AT5G21274	55507000	0	16741000	0	51027000	35331000	0	0	0	0	0	40118000	0	0	0	0	0	25165000	0	11464000	0	0	0	31380000	32833000	0	7456300	0	62810000	0	0	0	20314000	0	0	22064000	35839000	29553000	0	36510000
AT5G22300	0	0	0	0	0	0	35434000	0	0	0	0	0	24553000	0	0	0	0	0	0	0	0	0	0	0	0	0	0	0	0	0	0	0	0	0	0	14128000	0	0	0	0
AT5G22330	0	0	0	0	34512000	0	0	0	0	0	0	40182000	47066000	0	0	0	0	0	0	0	0	0	0	76572000	0	0	0	0	0	0	0	0	0	0	0	0	0	0	0	28420000
AT5G22440.2;AT5G22440.1	797270000	0	381330000	0	325850000	0	4090400000	327240000	1348300000	357240000	217850000	62939000	107130000	2463200000	180740000	0	498230000	136700000	1560900000	1547200000	0	508170000	0	630000000	2017300000	1903800000	0	3614800000	0	0	3501100000	1233800000	1542200000	859290000	45754000	79829000	1646800000	388710000	402830000	431690000
AT5G22640	0	0	0	0	6191800	0	5947900	0	0	0	0	0	7611700	0	0	0	0	0	0	0	0	0	0	0	0	0	0	0	0	0	0	0	0	0	0	0	0	0	0	0
AT5G22650	19825000	0	0	0	17790000	0	0	0	0	0	0	8614000	10684000	0	0	0	0	0	0	0	0	0	0	10775000	10564000	0	0	0	0	0	0	0	0	0	0	15556000	27135000	18258000	0	14483000
AT5G22780	5655000	0	0	0	4913000	0	7267100	0	0	0	0	4302800	7787300	0	0	0	0	0	6359100	0	0	0	0	11384000	0	0	0	0	0	0	0	0	0	0	0	11790000	0	0	4624700	0
AT5G23010	0	0	0	0	5458800	0	4547400	0	0	0	0	0	0	0	0	0	0	0	0	0	0	0	0	0	0	0	0	0	0	0	0	0	0	0	0	9412900	0	0	0	4428600
AT5G23020	21252000	0	0	0	0	0	0	0	0	0	0	0	0	0	0	0	0	0	7129900	0	0	0	0	5536800	9855600	0	9051900	0	0	0	0	0	0	0	0	37013000	0	7862000	10850000	14558000
AT5G23060	0	0	0	0	40495000	19264000	44557000	20666000	22339000	0	0	27721000	46369000	32962000	0	19268000	0	27091000	0	0	0	0	0	0	0	0	0	0	0	0	0	0	0	0	0	0	0	0	0	0
AT5G23120	16677000	0	9475400	0	10783000	6370600	8570600	0	8810900	0	0	10861000	8623800	6013900	0	0	0	6544900	0	0	0	0	0	0	0	0	0	0	0	0	0	0	0	0	0	0	0	0	0	0
AT5G23535.1	0	29343000	28246000	0	17263000	0	59952000	0	0	0	14784000	0	91374000	0	0	0	19263000	12096000	33513000	0	0	16205000	0	82769000	0	24336000	0	0	0	0	0	0	0	0	0	98097000	100310000	35836000	29076000	29939000
AT5G23540	61186000	0	0	0	24800000	0	36119000	0	0	0	0	14985000	82008000	29351000	0	0	0	10574000	16547000	0	0	0	0	25549000	11832000	0	0	0	20479000	54893000	0	0	0	7509600	0	136690000	25687000	27149000	25432000	32280000
AT5G23630	2138800	0	0	0	0	0	0	0	0	0	0	0	0	0	0	0	0	0	0	0	0	0	0	1810400	0	0	0	0	0	0	0	0	0	0	0	5715900	0	0	0	2357800
AT5G23740.1	55161000	87513000	54029000	82187000	188570000	259190000	121010000	82238000	45289000	223520000	201890000	158120000	59982000	0	0	0	161400000	377770000	50519000	117480000	0	186700000	374070000	422660000	97167000	103710000	0	0	0	134410000	0	135670000	345760000	118950000	86035000	33895000	23900000	0	68542000	156010000
AT5G23820	11935000	0	11520000	0	11884000	7944600	17624000	0	6590800	0	0	3892000	14174000	7326100	0	0	0	0	17736000	0	0	0	0	23566000	15136000	0	0	0	0	0	0	0	6441900	5827000	0	22769000	16531000	15606000	16504000	0
AT5G23830	18837000	0	0	0	0	0	0	0	0	0	0	0	0	0	0	0	0	0	17677000	0	0	0	0	13908000	0	8420700	0	0	0	0	0	0	0	7794700	0	15476000	14138000	11437000	8749100	0
AT5G23900.1	307360000	0	248980000	0	124130000	0	0	263840000	292670000	130670000	98850000	0	27313000	148230000	0	0	82435000	0	498550000	311980000	49004000	184630000	0	258610000	352460000	398910000	0	41721000	0	0	104270000	178030000	253820000	104940000	0	0	319050000	60132000	67741000	80233000
AT5G24710	0	0	0	0	10734000	0	13517000	0	0	0	0	0	14483000	0	0	0	0	0	0	0	0	0	0	15067000	0	0	0	0	0	0	0	0	0	0	0	0	0	0	0	0
AT5G24770	11277000	20366000	136160000	0	64887000	33503000	22014000	0	0	0	0	0	4984700	0	0	0	0	0	52982000	0	0	0	0	32081000	22619000	17614000	22955000	0	18426000	0	0	0	15137000	7025700	0	10320000	56611000	34425000	34420000	0
AT5G24780	0	44774000	104000000	0	85767000	23176000	15891000	0	0	0	0	0	0	0	0	0	0	0	0	0	0	0	0	0	0	0	0	0	0	0	0	0	0	0	0	9616000	0	0	0	0
AT5G25250	2376300	0	0	0	0	0	32472000	0	0	0	0	0	23939000	27524000	0	0	0	0	0	0	0	0	0	0	0	0	0	0	0	0	0	0	0	0	0	0	0	0	0	8773800
AT5G25757	8875800	0	0	0	16406000	0	12661000	0	0	0	0	6796800	27448000	10737000	0	0	0	8345700	4760700	0	0	0	0	14372000	0	0	6888300	0	0	0	0	0	0	0	0	31377000	0	0	6758200	11405000
AT5G25940	3395900	0	0	0	0	0	6939900	0	0	0	0	0	4381000	3421100	0	0	0	0	0	0	0	0	0	3171600	3289200	0	0	0	0	0	0	0	0	0	0	0	0	0	0	0
AT5G25980	0	86223000	322160000	98227000	377230000	218590000	215900000	97662000	177040000	58871000	97067000	144220000	214850000	87755000	75195000	156670000	0	189140000	0	0	0	0	0	0	0	0	0	0	0	0	0	0	0	0	0	0	0	0	0	0
AT5G26000	259570	256140000	464530000	239480000	645470000	434650000	481580000	427500000	322400000	490020000	415570000	524700000	264230000	279850000	231850000	303150000	0	333200000	0	0	0	0	0	0	0	0	0	0	0	0	0	0	0	0	0	0	0	0	0	0
AT5G26260	20648000	0	0	0	0	0	0	0	0	0	0	0	0	0	0	0	0	0	59119000	0	19614000	0	50531000	113250000	24788000	43705000	37883000	0	95698000	0	0	0	26921000	25363000	0	39641000	22038000	11578000	25413000	28376000
AT5G26280	34649000	0	0	0	0	0	0	0	0	0	0	0	0	0	0	0	0	0	106960000	0	23115000	0	53192000	350370000	53969000	66179000	84911000	0	173580000	0	0	0	8808000	30564000	0	94704000	15969000	17833000	10036000	36083000
AT5G26360	53137000	0	27338000	0	19157000	0	46587000	0	0	0	0	15105000	44486000	31110000	0	25731000	0	17352000	30623000	0	0	0	0	42022000	17783000	0	9802700	0	0	0	0	0	0	0	0	109060000	16723000	27299000	22981000	42747000
AT5G26667	7518600	0	0	0	5444100	0	5987100	0	0	0	0	0	4875400	0	0	0	0	0	10317000	0	0	0	0	13102000	7627100	5200500	4768400	0	0	0	0	0	4381200	0	0	8552300	11232000	9523100	0	12540000
AT5G26710	16054000	0	0	0	5170400	0	4918300	4017600	0	0	0	0	11230000	0	0	0	0	6568700	4812600	0	0	0	0	11746000	0	0	0	0	11941000	0	0	0	0	4816700	0	111050000	10466000	3831700	13889000	19611000
AT5G26780	26960000	0	0	0	0	0	9255800	0	0	0	0	0	0	0	0	0	0	6150300	0	0	0	0	0	12812000	0	0	0	0	0	0	0	0	0	0	0	9310600	0	14444000	0	9575600
AT5G26800	98627000	0	0	0	0	0	0	0	0	0	0	0	0	0	0	0	0	0	37186000	0	0	0	0	0	0	0	0	0	0	0	0	0	0	0	0	0	0	0	0	15072000
AT5G26830	27523000	0	0	0	5365400	4147900	9136000	14290000	0	0	0	4589900	9445900	12952000	0	0	0	6234800	5584200	0	0	0	0	8360800	6168100	0	0	0	8026500	0	0	0	0	0	0	44881000	0	5464500	7454300	11618000
AT5G27120	10017000	0	0	0	0	0	0	0	0	0	0	0	10387000	12542000	0	0	0	21017000	0	0	0	0	0	6544100	0	0	9827200	0	16881000	0	0	0	0	0	0	16833000	0	19050000	11419000	11451000
AT5G27380	11483000	0	0	0	21105000	10452000	17801000	0	29031000	0	0	12615000	0	21046000	0	0	0	21460000	0	0	0	0	0	16560000	0	0	0	0	0	0	0	0	0	0	0	0	0	0	0	0
AT5G27470	37045000	0	0	0	2883300	5247600	6093300	0	0	0	0	0	6074100	0	0	0	0	0	6856700	0	0	0	10886000	5467900	0	0	7991900	0	0	0	0	0	0	0	0	0	0	3903200	0	6779100
AT5G27640.1;AT5G27640.2;AT5G25780.1	0	6874300	0	89350000	7915500	48908000	4297500	3723000	0	0	15294000	152260000	18956000	4796300	16967000	0	8542700	18168000	0	0	0	0	110270000	26809000	3991400	5096100	0	0	0	0	0	4213800	2425800	0	130880000	80117000	109410000	50859000	34586000	14589000
AT5G27700.1	29371000	234320000	44040000	126970000	202500000	271560000	175500000	63746000	46423000	113860000	34882000	190460000	70192000	0	45895000	0	274410000	1175800000	32587000	197760000	0	419150000	702450000	299690000	127520000	397130000	0	0	750770000	0	66506000	196770000	49229000	207050000	108150000	39009000	10159000	26048000	203050000	355280000
AT5G27770.1	462720000	0	465460000	0	140070000	6474000	23527000	233330000	373960000	0	118440000	0	0	393550000	159940000	0	169060000	22966000	469520000	649630000	0	0	0	337840000	548570000	1017200000	0	71727000	0	0	0	395030000	363330000	210160000	0	0	463990000	128790000	101430000	248820000
AT5G27820.1	0	23267000	0	0	0	0	0	0	0	0	15073000	0	32910000	0	0	0	34874000	6547500	0	0	0	12589000	0	113480000	9499200	16080000	0	0	0	0	0	17801000	16394000	0	5071600	25739000	173450000	18469000	18799000	23555000
AT5G27850.1	636630000	0	645910000	0	323000000	0	29037000	750930000	587610000	464280000	267800000	6675700	91960000	513770000	270530000	0	561860000	25864000	1769000000	830970000	0	364730000	18158000	564990000	1270400000	1085000000	0	58074000	0	0	679210000	762230000	584370000	222880000	0	105590000	1127200000	274220000	260260000	391520000
AT5G28060.1	97462000	149700000	88703000	102040000	436420000	619990000	245690000	138530000	124400000	302190000	446270000	363860000	104500000	43007000	62847000	0	364110000	1307500000	76890000	249430000	0	658690000	542750000	551770000	246480000	379100000	0	154650000	1602400000	0	114260000	358430000	353040000	532460000	218620000	34084000	48135000	34812000	149190000	326770000
AT5G28540	55642000	0	0	0	0	36440000	0	0	0	0	0	14721000	0	0	0	0	0	61074000	10637000	0	0	0	0	16107000	8414900	0	20509000	0	0	0	0	0	0	0	0	0	13079000	0	0	18712000
AT5G28840	12501000	0	0	0	15225000	0	17248000	0	0	0	0	23238000	12803000	17361000	0	0	0	13838000	9240900	0	0	0	0	10890000	5359000	0	0	0	0	0	0	0	0	0	0	19571000	0	11977000	0	14492000
AT5G28900	5644300	0	0	0	0	0	0	0	0	0	0	0	0	0	0	0	0	0	0	0	0	0	0	4341700	0	0	0	0	0	0	0	0	0	0	0	14319000	0	0	0	0
AT5G30510.1	222090000	490550000	135510000	2096200000	652420000	1729200000	570770000	128440000	169120000	359100000	490830000	1555100000	404030000	129130000	254790000	0	515870000	158350000	5542300	0	0	33979000	171270000	16509000	18789000	27647000	0	0	82712000	0	0	0	15403000	0	12271000	3298500	3106300	0	9045400	30383000
AT5G35360	6868000	0	9430900	0	29935000	9133600	25446000	0	0	0	0	17364000	31855000	24507000	0	10060000	0	15402000	13304000	0	0	0	10769000	21325000	14351000	10296000	0	0	0	0	0	0	0	0	0	15838000	9060200	15982000	8476400	8245200
AT5G35530.1	0	20776000	0	29770000	196880000	79476000	37657000	0	0	0	84059000	62250000	0	0	0	0	162270000	238700000	0	60792000	0	250680000	166120000	86816000	61215000	97343000	0	0	0	0	0	86217000	218110000	156230000	48480000	0	15670000	0	83470000	181000000
AT5G35590	41925000	0	17533000	0	52126000	7550200	32639000	18013000	0	0	0	19938000	37290000	30116000	23680000	23626000	0	19616000	111130000	0	12666000	0	24130000	55349000	25082000	14755000	14921000	0	0	0	0	0	0	14192000	0	39447000	56816000	54352000	23735000	35146000
AT5G35630	45833000	102370000	310910000	90798000	625690000	396400000	324020000	250090000	120590000	46979000	82497000	320890000	157120000	159050000	67967000	141000000	0	414250000	29140000	0	0	0	14030000	23739000	10424000	5650100	5445400	0	0	0	0	0	3150500	2012800	0	3075200	10920000	4986700	6070900	5998500
AT5G35940	0	0	0	0	0	0	0	0	0	0	0	0	0	0	0	0	0	0	33170000	0	9596800	0	0	69366000	14170000	13922000	0	0	0	0	0	0	0	0	0	6646900	0	0	0	0
AT5G36790	0	0	38993000	0	39902000	38995000	25259000	26055000	0	0	0	8883100	19269000	21819000	0	36651000	0	21883000	0	0	0	0	0	0	0	0	0	0	0	0	0	0	0	0	0	0	0	0	0	0
AT5G36880	3265000	0	6358400	0	10438000	6199200	9969200	0	0	0	0	13286000	14077000	13226000	0	10455000	0	14797000	9436400	0	0	0	12752000	12497000	9078400	7591400	11593000	0	0	0	0	0	0	7208400	0	10449000	6724800	11316000	8322900	9391300
AT5G37510	39232000	0	0	0	63138000	6348500	43648000	0	0	0	0	14307000	104290000	32096000	0	0	0	15393000	37704000	0	6591800	0	13635000	96777000	33105000	12986000	16405000	0	31889000	38207000	0	0	12347000	21005000	0	51934000	23578000	28441000	20582000	24837000
AT5G37600	186040000	0	13920000	0	30833000	18788000	44394000	46368000	33333000	47453000	0	37945000	26937000	37983000	25238000	32246000	0	51895000	45437000	0	15603000	0	40870000	37237000	24319000	15819000	31408000	0	31090000	0	0	0	28084000	15615000	26247000	23227000	28795000	30401000	48357000	48883000
AT5G37780	90321000	0	0	0	29455000	17134000	0	0	0	0	0	9437800	0	0	0	0	0	22932000	24178000	0	8508200	0	0	30238000	15467000	11480000	9018100	0	0	0	0	0	0	0	0	0	22740000	17345000	16794000	31562000
AT5G37830	16037000	0	3619100	0	4707100	4258300	0	0	0	0	0	4101200	0	0	0	0	0	5077300	0	0	0	0	0	0	3301400	0	0	0	0	0	0	0	0	4640900	0	3804600	4372200	4729000	0	4254500
AT5G38420	10098000	397190000	1379200000	2240000000	1493800000	687030000	690190000	468350000	881960000	121120000	164590000	379910000	1020600000	968760000	737650000	1113400000	0	1152700000	45775000	0	0	0	0	27080000	8891700	18532000	0	0	17212000	0	0	0	0	0	0	3531500	0	0	0	5765600
AT5G38430	0	101490000	334120000	119940000	399340000	142570000	254420000	196870000	254400000	69226000	79108000	123020000	380900000	317050000	214500000	299650000	0	399140000	5360400	0	0	0	0	0	0	0	0	0	0	0	0	0	0	0	0	0	0	0	0	0
AT5G38470	3807900	0	0	0	5154900	0	0	0	0	0	0	0	0	0	0	0	0	0	7060500	0	0	0	0	5819000	0	0	0	0	0	0	0	0	0	0	0	0	0	0	0	7146500
AT5G38480	80828000	0	29776000	0	23930000	17187000	19905000	28292000	0	0	0	35990000	21525000	30944000	0	0	0	24418000	32889000	0	18183000	0	0	35763000	35677000	0	30928000	0	33687000	0	0	0	0	41357000	37305000	15238000	36507000	28885000	25635000	35133000
AT5G39320	18594000	0	0	0	0	0	0	0	0	0	0	0	0	0	0	0	0	0	7167400	0	0	0	0	10895000	6718200	4116900	0	0	0	0	0	0	4185700	11483000	0	54421000	0	6649200	9839600	11265000
AT5G39600	46289000	0	0	0	0	0	0	0	0	0	0	0	0	18839000	0	0	0	0	0	0	0	0	0	0	34388000	0	0	0	0	0	0	0	0	18446000	0	0	0	12287000	0	0
AT5G39730	0	0	0	0	0	0	0	0	0	0	0	0	0	0	0	0	0	0	0	0	0	0	0	14016000	0	0	0	0	0	0	0	0	0	0	0	0	0	8260000	0	10614000
AT5G39740.2;AT5G39740.1	301940000	12155000	396030000	0	176190000	0	0	292340000	405390000	195330000	134040000	0	62789000	334860000	183260000	0	139630000	20949000	416760000	484990000	0	175030000	7793600	320040000	567480000	648170000	0	79090000	0	0	688870000	424000000	498530000	224630000	6316900	56352000	903580000	176140000	128550000	180850000
AT5G39850.1	0	0	0	30222000	99475000	30165000	27995000	0	0	0	60921000	38764000	0	0	0	0	66802000	244050000	0	69301000	0	67102000	164060000	109170000	36634000	21662000	0	0	0	0	0	36294000	97312000	0	34771000	0	0	0	21024000	101140000
AT5G40080.1;AT4G09012.1	0	0	0	0	0	0	0	0	0	0	0	0	0	0	0	0	0	0	0	0	0	0	0	26326000	0	0	0	0	0	0	0	0	0	0	0	24557000	27504000	0	0	0
AT5G40370	7075600	0	11943000	0	9490600	0	29098000	0	0	0	0	0	15792000	21166000	0	0	0	12943000	16969000	0	0	0	13386000	18927000	12727000	12772000	11700000	0	0	0	0	0	10785000	13415000	0	14905000	13910000	17719000	12914000	17169000
AT5G40580	7279100	0	0	0	4986500	0	0	0	0	0	0	0	0	0	0	0	0	0	8010300	0	0	0	0	0	6705400	0	0	0	0	0	0	0	0	0	0	0	0	8343100	0	0
AT5G40760	11771000	0	0	0	0	0	0	0	0	0	0	0	0	0	0	0	0	0	3748400	0	0	0	0	3717100	0	0	0	0	0	0	0	0	0	0	0	20643000	0	5334700	5584000	8106900
AT5G40770	305370000	0	24296000	34310000	192040000	26817000	408710000	124440000	92266000	0	0	33696000	345510000	156800000	64493000	52463000	0	53442000	115700000	0	0	0	0	770990000	43629000	51700000	51087000	0	72452000	289680000	0	0	74577000	126760000	56166000	159100000	51918000	21598000	148820000	172320000
AT5G40890	0	0	0	0	0	0	0	0	0	0	0	0	0	0	0	0	0	0	4508400	0	0	0	0	2364200	0	0	0	0	0	0	0	0	0	3044700	0	0	0	0	0	0
AT5G40950.1	293800000	3260500000	780840000	16813000	340500000	18851000	1183100000	399240000	104040000	124080000	362940000	25236000	909330000	184260000	266930000	0	271090000	0	0	17704000	0	0	0	217260000	13777000	0	0	0	0	0	0	13410000	0	0	0	126340000	45485000	0	12568000	15168000
AT5G41520.1;AT5G41520.2	33812000	64471000	40369000	95001000	166180000	407690000	100600000	93215000	0	182180000	188960000	303580000	93439000	16449000	30071000	0	602590000	1446000000	0	101810000	0	317760000	1291800000	427950000	193770000	222870000	0	176490000	184760000	0	43987000	273280000	988080000	483620000	303530000	45381000	43379000	35630000	269280000	398580000
AT5G41670	49871000	0	0	0	11432000	9634900	19002000	19728000	0	0	0	5872400	0	0	13361000	0	0	24429000	12756000	0	0	0	0	29681000	15033000	19072000	17268000	0	0	0	0	0	0	16977000	0	23396000	9950900	12741000	0	29573000
AT5G42080	785050000	0	9384300	0	38495000	264820000	105260000	12763000	33548000	0	0	301850000	73145000	41874000	0	10764000	0	428560000	9313400	0	0	0	29497000	198670000	28860000	8538100	15855000	0	107390000	46828000	0	0	40314000	177740000	95655000	68998000	3615500	25866000	52457000	192910000
AT5G42270	0	0	0	0	20518000	0	13498000	13676000	0	0	0	0	15213000	12832000	0	0	0	7444500	0	0	0	0	0	0	0	0	0	0	0	0	0	0	0	0	0	0	0	0	0	0
AT5G42650	0	0	0	0	29592000	16565000	9951700	0	0	0	0	11614000	14709000	0	0	0	0	5902100	0	0	0	0	0	0	0	0	0	0	0	0	0	0	0	0	0	6541000	0	0	0	0
AT5G42740	25304000	0	12632000	0	13096000	14652000	18127000	19696000	16900000	0	0	13339000	38222000	21111000	19605000	0	0	10601000	19165000	0	0	0	22883000	16691000	16347000	0	15051000	0	0	0	0	0	13592000	12882000	0	18489000	18139000	21459000	19070000	22071000
AT5G42790	0	0	0	0	27030000	0	0	0	0	0	0	13454000	0	0	0	0	0	15213000	18124000	0	0	0	0	0	10034000	0	0	0	0	0	0	0	0	0	0	12195000	15286000	18199000	0	19994000
AT5G42970.1	0	0	0	0	0	0	0	0	0	0	0	4970700	0	0	0	0	0	0	0	0	0	0	0	3653600	0	0	0	0	0	0	0	0	4414800	0	14223000	4261100	0	0	7732200	0
AT5G42980	261430000	58778000	129450000	75034000	172510000	66255000	135220000	136580000	78135000	77343000	69492000	47796000	131370000	141050000	95326000	112810000	0	62700000	612470000	81453000	153350000	0	163880000	638570000	331630000	225690000	286370000	0	361580000	344200000	136500000	149950000	196030000	200810000	132940000	371250000	317400000	368480000	268030000	308080000
AT5G43060	49596000	0	0	0	0	0	0	0	0	0	0	0	0	0	0	0	0	0	22432000	0	0	0	0	15277000	24924000	0	20069000	0	0	0	0	0	0	28674000	0	29121000	39383000	42438000	22962000	21279000
AT5G43330.1	0	0	0	8986500	5066600	0	0	0	0	0	0	7848900	0	0	0	0	0	10722000	0	0	0	0	8104700	5465800	0	0	0	0	0	0	0	0	0	0	0	0	0	0	3355800	0
AT5G43780	12579000	0	0	0	0	0	0	0	0	0	0	0	0	0	0	0	0	0	0	0	0	0	0	0	0	0	0	0	0	0	0	0	0	0	0	14334000	0	5683700	0	8115400
AT5G43940	211890000	37475000	100820000	66755000	147400000	128800000	113400000	124750000	57495000	38979000	89265000	128060000	69117000	81784000	50942000	56933000	0	80518000	88859000	0	39925000	0	70564000	77091000	63768000	36477000	61622000	0	86119000	0	0	0	50013000	44798000	36808000	49706000	66660000	95684000	55847000	73511000
AT5G44070	1561800	0	0	0	0	0	3433600	0	0	0	0	0	0	0	0	0	0	0	0	0	0	0	0	0	0	0	0	0	0	0	0	0	0	0	0	7826500	0	0	0	0
AT5G44120	6709500	0	12102000	0	12637000	6007100	0	0	0	0	0	0	40829000	36742000	18299000	19674000	0	12752000	15828000	0	12935000	0	22080000	0	0	0	0	0	0	0	0	0	0	0	0	0	0	0	0	0
AT5G44140	2065000	0	0	0	0	0	12585000	0	0	0	0	0	0	0	0	0	0	0	0	0	0	0	0	10870000	0	0	0	0	0	0	0	0	0	0	0	7611100	0	0	0	0
AT5G44340	5472400	0	0	0	11418000	0	9413100	0	0	0	0	0	9536200	0	0	0	0	4735200	4530500	0	0	0	0	15824000	0	0	0	0	0	0	0	0	8391200	0	0	64682000	6035400	8106700	10638000	13655000
AT5G44500	12454000	11067000	12423000	0	20623000	14107000	13981000	0	0	0	0	20535000	15014000	0	0	0	0	10866000	19355000	0	13125000	0	0	11224000	0	9691200	0	0	0	0	0	0	14226000	19050000	0	0	15777000	16217000	0	0
AT5G44710	63219000	0	0	0	0	10238000	0	0	0	0	0	19366000	0	0	0	0	0	10485000	35078000	0	0	0	0	12678000	11309000	0	0	0	0	0	0	0	0	8411300	0	0	0	0	0	0
AT5G44720	12675000	0	0	0	0	0	0	0	0	0	0	0	0	0	0	0	0	0	0	0	0	0	0	0	0	0	0	0	0	0	0	0	0	0	0	7444000	0	0	0	4752000
AT5G45390	0	0	0	0	21951000	6773000	16475000	0	0	0	0	11679000	13373000	0	0	0	0	18483000	0	0	0	0	0	7715500	0	0	0	0	0	0	0	0	0	0	0	17994000	0	0	0	0
AT5G45590	0	0	0	12702000	0	0	0	0	0	0	0	7303300	0	0	0	0	0	0	0	0	0	0	0	0	14286000	0	0	0	0	0	0	0	0	0	0	0	0	27185000	0	0
AT5G45620	4939500	0	0	0	6304100	0	6809800	0	0	0	0	0	13781000	6510900	0	0	0	0	0	0	0	0	0	4170200	3858900	0	0	0	0	0	0	0	0	0	0	20598000	0	3887300	0	4210700
AT5G45775.1;AT5G45775.2;AT4G18730.1;AT3G58700.1;AT2G42740.1	3762000000	224730000	3934300000	40001000	1825000000	74855000	301180000	2822600000	2619700000	2171800000	1201400000	73676000	796030000	3487400000	1921700000	0	1281700000	189830000	4889600000	4940300000	0	2669600000	59726000	2760300000	5898100000	4645900000	0	974280000	106920000	1023000000	7088300000	3280000000	2947800000	1883900000	103420000	449290000	6954500000	1575100000	1280700000	1655200000
AT5G46070	0	0	0	0	0	0	0	0	0	0	0	0	0	0	0	0	0	0	0	0	0	0	0	0	0	0	0	0	0	0	0	0	0	0	0	27581000	19036000	6651700	0	6525400
AT5G46110	0	0	0	0	27012000	19148000	0	0	0	0	38107000	0	23780000	0	0	0	0	0	0	0	0	0	0	0	0	0	0	0	0	0	0	0	0	0	0	0	0	0	0	0
AT5G46160.2;AT5G46160.1	0	10645000	14231000	0	13816000	0	41745000	0	0	0	17573000	0	76922000	0	0	0	21320000	6245400	0	0	0	0	0	236220000	7859300	18497000	0	0	0	0	0	18621000	16763000	0	2517900	171870000	237390000	6969500	21455000	40752000
AT5G46290	14188000	0	0	0	15712000	9068200	22054000	0	0	0	0	13291000	0	0	0	0	0	10195000	0	0	0	0	0	16365000	7683200	0	0	0	0	0	0	0	0	5091400	0	17366000	0	0	15137000	10528000
AT5G46430.2;AT5G46430.1	601110000	31248000	622860000	0	301670000	0	32945000	450980000	854370000	381150000	283110000	0	74077000	261590000	238300000	0	191380000	22150000	595310000	743690000	0	269930000	10324000	390620000	811280000	488860000	0	106680000	0	0	694860000	468640000	359760000	254870000	0	26405000	415030000	125650000	122400000	151330000
AT5G47030	11014000	0	0	0	47645000	0	77067000	0	0	0	0	0	104430000	16254000	0	0	0	10843000	14379000	0	0	0	0	161800000	11932000	13976000	9135400	0	0	0	0	0	9208500	0	0	51598000	17796000	22439000	26241000	32615000
AT5G47190.1	207510000	1878600000	872030000	20071000	256420000	8157700	1351900000	306840000	0	0	244470000	17276000	721490000	99679000	145960000	0	141920000	14301000	0	0	0	0	0	95192000	0	0	0	0	0	0	0	0	0	0	0	55339000	43313000	0	0	0
AT5G47200	55971000	0	0	0	6584900	0	0	0	0	0	0	0	0	0	0	0	0	0	14625000	0	0	0	0	20458000	6731300	0	12510000	0	0	0	0	0	11277000	16567000	0	20769000	7422600	6771500	16350000	23232000
AT5G47210	3247900	0	0	0	7932300	0	0	0	0	0	0	0	0	0	0	0	0	0	11145000	0	0	0	0	21929000	33355000	0	29928000	0	0	0	0	0	0	0	0	0	0	0	0	0
AT5G47320.1	0	7863000	0	0	17725000	0	0	0	0	0	17011000	0	0	0	0	0	25080000	58022000	0	0	0	12064000	35851000	9300700	0	0	0	0	0	0	0	11969000	9423600	0	26304000	0	0	0	10753000	40564000
AT5G47700.2;AT5G47700.1	661410000	26998000	1049800000	5110800	384300000	5782500	31949000	1457800000	365600000	311380000	197370000	9343700	135710000	634570000	466980000	0	423260000	48431000	938440000	1050700000	0	1134200000	0	639470000	2072500000	1656100000	0	246650000	10725000	80560000	1159300000	1373800000	1099200000	325080000	14933000	63235000	869880000	484550000	421210000	505350000
AT5G47870	2345700	0	4909700	0	0	0	4584500	0	0	0	0	0	0	0	0	0	0	0	0	0	0	0	0	0	0	0	0	0	0	0	0	0	0	0	0	0	0	0	0	0
AT5G47910	2041200	0	0	0	0	0	0	0	0	0	0	0	4025300	0	0	0	0	0	9901700	0	0	0	0	10676000	0	0	0	0	0	0	0	0	0	11965000	0	10794000	0	0	0	0
AT5G47930.1	0	37395000	0	17156000	85229000	86926000	0	0	0	0	69365000	84066000	16330000	0	0	0	103300000	333100000	0	0	0	227140000	244860000	142880000	65565000	69906000	0	92721000	135600000	0	0	74867000	36561000	174840000	50356000	0	15645000	0	37438000	144190000
AT5G48230	68288000	0	8297900	0	7695100	6253600	8923100	0	0	0	0	5082300	8366500	0	0	0	0	8017600	28693000	0	9102200	0	32735000	21414000	13921000	11011000	20596000	0	0	0	0	0	17997000	26891000	0	22403000	24216000	14279000	34663000	40396000
AT5G48300	0	0	0	0	9498400	0	11204000	0	0	0	0	0	0	11921000	0	0	0	0	0	0	0	0	0	0	0	0	0	0	0	0	0	0	0	0	0	0	0	0	0	0
AT5G48760.2;AT5G48760.1	110860000	0	0	0	0	0	0	181180000	151400000	0	40310000	0	30097000	179750000	87988000	0	88109000	0	244690000	260320000	0	166540000	0	104050000	349020000	201970000	0	0	0	0	397040000	159260000	260150000	68085000	0	0	185730000	57304000	51394000	91047000
AT5G49210	57269000	0	0	0	0	17321000	22516000	0	0	0	0	19321000	19363000	0	0	0	0	23978000	44524000	0	27720000	0	0	23173000	18312000	0	11630000	0	0	0	0	0	0	25326000	0	30693000	0	0	12086000	23205000
AT5G49650	2605500	0	6391500	0	7974400	0	0	0	0	0	0	0	0	0	0	0	0	0	7545800	0	0	0	0	8487800	0	0	0	0	0	0	0	0	0	0	0	0	0	0	0	0
AT5G49810	10514000	0	0	0	4167300	0	6654100	0	0	0	0	4500300	4006800	0	0	0	0	0	4474300	0	0	0	0	6075400	4265600	0	0	0	0	0	0	0	0	0	0	16388000	3519600	4350000	0	7340900
AT5G49910	0	0	0	0	15585000	0	13176000	0	0	0	0	13144000	15886000	17744000	0	0	0	0	0	0	0	0	0	0	0	0	0	0	0	0	0	0	0	0	0	0	0	0	0	0
AT5G50850	169530000	0	0	0	36138000	14918000	78087000	40930000	0	0	0	40953000	53748000	35075000	0	0	0	15668000	33179000	0	0	0	21597000	43846000	21883000	7300700	17408000	0	53932000	86848000	0	0	12850000	27847000	39725000	194640000	52609000	42963000	54349000	62904000
AT5G50920	0	0	13572000	0	35644000	18195000	29360000	24173000	0	0	0	40180000	23782000	23227000	0	14940000	0	24189000	0	0	0	0	0	5265900	0	0	0	0	0	0	0	0	0	0	0	16363000	0	7984700	8897700	0
AT5G51570	12209000	0	0	0	16147000	0	54780000	0	0	0	0	0	30830000	0	0	0	0	0	9198200	0	0	0	0	22131000	0	0	0	0	0	0	0	0	0	0	0	14474000	0	0	0	0
AT5G51820	0	0	0	0	7051900	7542200	7788700	6256500	0	0	0	6407000	8511700	8824800	0	0	0	9050100	0	0	0	0	0	0	0	0	0	0	0	0	0	0	0	0	0	0	0	0	0	0
AT5G51830	3458800	0	0	0	0	0	0	0	0	0	0	0	0	0	0	0	0	0	0	0	0	0	0	0	0	0	0	0	0	0	0	0	0	0	0	5505500	0	0	7073900	0
AT5G51970	47360000	0	28693000	0	45060000	29412000	29579000	40097000	23816000	0	0	49611000	19230000	28540000	0	0	0	24566000	41410000	0	0	0	40095000	29208000	43590000	13445000	28013000	0	0	0	0	0	15570000	21450000	0	20441000	27086000	40869000	11825000	33060000
AT5G52650.1;AT4G25740.1;AT4G25740.2	65037000	166650000	87516000	343470000	515670000	851280000	362310000	193450000	21754000	312700000	388370000	672680000	173830000	36089000	69281000	0	540710000	1732600000	57479000	284220000	0	546470000	1371200000	1129700000	497590000	670810000	0	326010000	650360000	0	136000000	318800000	209040000	439300000	517100000	90082000	47647000	48659000	271850000	575150000
AT5G52820	0	0	0	0	0	0	0	0	0	0	0	0	0	0	41981000	27710000	0	0	0	0	0	0	0	0	0	33503000	8034600	0	0	0	0	0	15806000	7634800	0	0	0	45697000	56001000	21005000
AT5G52840	23355000	0	0	0	32269000	0	13115000	0	0	0	0	0	31449000	14559000	0	0	0	7680800	12224000	0	0	0	0	19328000	16819000	0	0	0	0	0	0	0	0	6996000	0	32407000	17459000	19866000	13774000	16966000
AT5G52920	22584000	0	7561600	0	5549900	0	0	0	0	0	0	0	0	0	0	0	0	6782900	6363200	0	0	0	0	16870000	3478000	6223700	0	0	0	0	0	0	4391300	0	0	32316000	5585100	0	0	22426000
AT5G53070.1	0	84443000	84957000	0	28579000	0	81937000	51527000	0	0	26435000	0	90495000	0	0	0	34073000	14596000	0	0	0	31148000	0	169280000	38945000	46946000	0	49430000	0	0	0	58380000	34954000	42501000	0	123530000	190700000	60820000	38187000	35458000
AT5G53460	70816000	0	18550000	0	25997000	16085000	21781000	21976000	0	0	0	34230000	29236000	27004000	0	0	0	40486000	0	0	0	0	0	12849000	7879300	0	0	0	0	0	0	0	0	6810200	0	17573000	21860000	22778000	16756000	20173000
AT5G53480	13504000	0	0	0	0	0	0	0	0	0	0	0	0	0	0	0	0	5302200	0	0	0	0	0	6790500	0	0	0	0	0	0	0	0	0	0	0	0	0	0	0	0
AT5G53560.1	0	23685000	0	34164000	16059000	20277000	21216000	17777000	0	0	24615000	22979000	24984000	0	13353000	0	13207000	47347000	0	0	0	15442000	50806000	58804000	25933000	34099000	0	40877000	0	0	0	18556000	14595000	0	32896000	38650000	46185000	29882000	33352000	15880000
AT5G53850.2;AT5G53850.1;AT5G53850.3	0	4728100	0	5428000	3848900	9228700	0	0	0	0	3413700	4640900	9961000	0	0	0	5636200	6176600	0	0	0	7396100	4395700	6151800	0	0	0	0	0	0	0	4505200	0	0	6091500	3286300	4447200	5473300	7185600	7729000
AT5G54100	17146000	0	0	0	0	0	0	0	0	0	0	0	15967000	0	0	0	0	0	8931500	0	0	0	0	0	0	0	0	0	0	0	0	0	0	0	0	16107000	0	0	0	0
AT5G54160	110700000	0	12788000	0	13041000	8162400	38412000	37232000	26804000	0	0	26247000	23765000	33426000	0	0	0	25522000	23507000	0	0	0	0	35040000	23604000	0	19935000	0	28698000	0	0	0	12534000	20215000	0	43808000	15655000	22763000	27363000	34607000
AT5G54270	0	0	0	0	77600000	26668000	32691000	21170000	0	0	0	22687000	119230000	0	0	0	0	77705000	0	0	0	0	0	4977100	0	0	0	0	0	0	0	0	0	0	0	0	0	0	0	0
AT5G54430	10504000	0	0	0	0	0	0	0	0	0	0	0	0	0	0	0	0	0	0	0	0	0	0	6222700	5882700	0	0	0	0	0	0	0	0	0	0	5099400	0	0	0	0
AT5G54500	68236000	0	0	0	24830000	12451000	53774000	44248000	10753000	0	0	28727000	17523000	17549000	0	0	0	20613000	29721000	0	0	0	0	22898000	17401000	0	23989000	0	0	0	0	0	11724000	15249000	0	35757000	19704000	17295000	22350000	37847000
AT5G54600.1;AT5G54600.2	212880000	1307600000	659760000	14287000	210880000	16160000	1175800000	305390000	72016000	94437000	149900000	35760000	954910000	73677000	137230000	0	145760000	12059000	0	0	0	0	0	111920000	0	7321000	0	0	0	0	0	0	0	0	0	29532000	59390000	0	0	0
AT5G54770	860840	0	28261000	0	58195000	41980000	22406000	35293000	0	0	0	35790000	29409000	24060000	0	0	0	24688000	0	0	0	0	0	0	16450000	0	0	0	0	0	0	0	0	0	0	0	0	0	0	0
AT5G54810	24543000	0	11663000	0	14639000	6666200	0	0	0	0	0	19662000	10259000	0	0	0	0	0	0	0	0	0	0	10306000	0	0	0	0	0	0	0	0	0	0	0	12201000	20545000	9033200	13966000	0
AT5G54960	103200000	0	22951000	0	97226000	1657100	85701000	14732000	0	0	0	37729000	123390000	28634000	0	20531000	0	42844000	918230000	8357100	41484000	104720000	42665000	682330000	32869000	25224000	36768000	0	36738000	629450000	0	0	73548000	36835000	22177000	437380000	99727000	44569000	58090000	64254000
AT5G55140.1	0	0	0	0	0	0	0	0	0	0	21641000	0	23495000	0	0	0	5249900	0	0	0	0	0	0	61182000	0	16485000	0	0	0	0	0	0	0	0	0	14185000	67416000	0	10179000	0
AT5G55480	5274000	0	0	0	2701200	0	0	0	0	0	0	0	0	0	0	0	0	0	0	0	0	0	0	0	0	0	0	0	0	0	0	0	0	0	0	0	0	0	0	4483800
AT5G55730	8773300	0	0	0	7731200	4958200	0	0	0	0	0	0	0	0	0	0	0	0	4254900	0	0	0	0	4710000	0	4838000	0	0	0	0	0	0	0	0	0	0	4978800	3667400	0	0
AT5G55940	3173100	0	0	0	0	0	0	0	0	0	0	0	5332000	0	0	0	0	0	0	0	0	0	0	0	0	0	0	0	0	0	0	0	0	0	0	7028700	4744800	0	5496000	0
AT5G56350	22534000	0	0	0	6585900	0	11119000	0	0	0	0	10889000	8360100	0	0	0	0	9055700	8480400	0	0	0	0	12330000	12261000	0	0	0	0	0	0	0	0	8140800	0	15680000	12508000	13140000	13776000	16574000
AT5G56500	6503100	0	0	0	0	0	0	0	0	0	0	0	0	0	0	0	0	0	11846000	0	0	0	0	9348700	0	0	0	0	0	0	0	0	0	0	0	0	0	5070400	0	0
AT5G56630	48643000	0	0	0	18208000	0	28154000	0	0	0	0	0	39673000	29450000	0	0	0	24741000	30295000	0	0	0	0	18551000	0	0	0	0	0	0	0	0	18808000	32962000	0	64142000	36773000	32445000	28136000	31622000
AT5G56670.1;AT4G29390.1;AT2G19750.1	0	59214000	0	12123000	361140000	307710000	127210000	52726000	29046000	336620000	177720000	169790000	34122000	18855000	19194000	0	183790000	481380000	60069000	0	0	695000000	94373000	73328000	54235000	74308000	0	66281000	0	0	0	26709000	188870000	604330000	7634100	0	0	0	69141000	289620000
AT5G56680	5434200	0	0	0	0	2545900	4296000	0	0	0	0	0	6784000	0	0	0	0	5491700	5296600	0	0	0	0	0	0	0	0	0	0	0	0	0	4201200	0	0	8237600	0	4149700	0	0
AT5G56940.1	0	6918400	0	3582000	8431400	17815000	0	0	0	0	24784000	11475000	0	0	0	0	11639000	47466000	0	0	0	14614000	45693000	8831500	0	10688000	0	31239000	0	0	0	9700100	4871300	0	41542000	0	3216100	0	13966000	18975000
AT5G57020	0	0	0	0	0	0	0	0	0	0	0	0	0	0	0	0	0	0	0	0	0	0	0	0	0	0	0	0	0	0	0	0	0	0	0	12152000	20444000	9278100	0	0
AT5G57290.3;AT5G57290.1;AT5G57290.2	562690000	30478000	527210000	0	291290000	0	0	715540000	592050000	510000000	155480000	9151500	129190000	791120000	279020000	0	287790000	38657000	576390000	473420000	0	259290000	20086000	492160000	734420000	845290000	0	0	0	109460000	500310000	747670000	761100000	114040000	11753000	55485000	497060000	314750000	94114000	166760000
AT5G57655	61635000	0	13735000	0	25462000	13610000	27791000	33261000	26878000	0	0	35497000	16432000	15987000	0	0	0	21300000	45870000	0	18793000	0	41615000	25367000	26882000	18604000	27623000	0	0	0	0	0	17101000	12904000	36157000	24970000	34601000	37706000	28640000	31947000
AT5G58070	13211000	0	0	0	0	0	7060900	0	0	0	0	6999000	0	0	0	0	0	0	19705000	0	0	0	0	18873000	9770500	0	7055100	0	0	0	0	0	0	9582900	0	0	0	14707000	0	10585000
AT5G58290	38219000	0	0	0	77595000	0	92543000	10109000	0	0	9290100	22562000	131270000	31758000	0	0	0	15586000	14355000	0	0	0	0	37131000	10708000	12493000	8799800	0	25704000	0	0	0	0	4600900	0	225110000	3780000	12463000	9958500	39049000
AT5G58330	0	0	15232000	9056300	28184000	12692000	27515000	23886000	0	0	0	21409000	24021000	21146000	11373000	13856000	0	13317000	0	0	0	0	0	6227800	3390500	0	0	0	0	0	0	0	0	0	0	3937100	0	0	0	0
AT5G58710	21342000	0	5398600	0	6995700	0	0	0	0	0	0	0	0	0	0	0	0	0	0	0	0	0	0	12141000	0	0	0	0	0	0	0	0	0	0	0	0	0	0	7160300	0
AT5G59090	65867000	0	0	0	0	0	0	0	0	0	0	0	0	0	0	0	0	0	23384000	0	0	0	33184000	28716000	18549000	22634000	19490000	0	28524000	0	0	0	21036000	25472000	29776000	44812000	42170000	54988000	41481000	48217000
AT5G59290	8530100	0	0	0	0	0	0	0	0	0	0	0	0	0	0	0	0	0	0	0	0	0	0	4298300	0	0	0	0	0	0	0	0	0	0	0	16222000	0	0	0	0
AT5G59850.1;AT1G07770.2;AT1G07770.1;AT2G39590.1	99957000	91077000	89609000	100180000	353680000	622670000	0	85804000	109440000	0	274460000	466830000	47109000	45684000	79270000	0	708610000	939380000	98984000	223490000	0	583790000	692140000	299740000	369770000	154380000	0	98853000	0	0	91636000	300370000	368060000	256800000	300130000	41297000	51590000	42213000	330740000	377300000
AT5G59880	15257000	0	0	0	18480000	8466900	16293000	0	0	0	0	8493300	0	0	0	0	0	9117100	24034000	0	5263400	0	0	31212000	11305000	0	0	0	0	0	0	0	0	14865000	0	18126000	0	0	0	15831000
AT5G59910	50738000	0	0	0	4014200	79797000	0	0	0	0	0	50295000	0	0	0	0	0	338520000	0	0	0	0	0	0	2281700	0	0	0	0	0	0	0	0	0	0	0	4835500	0	0	5862200
AT5G59970	30127000	33640000	0	0	0	144500000	0	0	0	0	0	100810000	9015500	11546000	0	71484000	0	446240000	0	0	0	0	25233000	15184000	9520000	7508200	3816800	0	37240000	0	0	0	24530000	51088000	69657000	10744000	0	7928200	0	15187000
AT5G60160	27177000	0	10856000	0	67204000	0	22259000	0	0	0	0	27926000	22463000	15030000	0	0	0	19216000	128850000	0	0	0	29851000	23839000	20064000	5297000	7178000	0	6862100	0	0	0	6757600	1230600	0	28581000	39129000	56738000	20186000	23277000
AT5G60390.3;AT5G60390.1;AT1G07940.2;AT1G07940.1;AT1G07930.1;AT1G07920.1;AT5G60390.2;AT1G07930.2	156290000	177470000	146370000	490180000	404000000	703930000	488560000	242290000	279060000	434110000	651200000	565850000	522420000	199940000	214690000	0	416310000	426490000	59747000	150000000	0	341950000	616840000	507130000	211400000	393590000	0	617620000	0	130810000	77595000	209180000	486690000	355360000	2204500000	1175000000	825910000	595820000	924460000	909510000
AT5G60530	5003000	0	0	0	0	0	0	0	0	0	0	0	0	0	0	0	0	0	0	0	0	0	0	0	0	0	0	0	0	0	0	0	0	0	0	0	0	6966900	0	7080400
AT5G60640	24223000	0	0	0	12075000	0	11101000	0	0	0	0	9750200	0	0	0	0	0	9647700	16807000	0	0	0	0	13347000	14102000	10091000	8453400	0	17263000	0	0	0	0	0	0	12283000	22434000	19241000	0	14634000
AT5G60670.1	142960000	0	0	0	46980000	0	0	62450000	129970000	0	20290000	0	30429000	82632000	80080000	0	127320000	0	96389000	122940000	0	119160000	0	67942000	296180000	11956000	0	41146000	0	0	113450000	90605000	0	82108000	0	0	263440000	63427000	39896000	73405000
AT5G60790	0	0	0	0	4858600	0	0	0	0	0	0	0	0	0	0	0	0	0	0	0	0	0	0	0	0	0	0	0	0	0	0	0	0	0	0	44225000	0	6839500	0	8423600
AT5G60960	272450000	0	28895000	89265000	0	25951000	0	98686000	13206000	0	0	26758000	0	121800000	0	0	0	30520000	13716000	15754000	11748000	0	0	0	381920000	7185800	50976000	0	0	0	86549000	0	16140000	12450000	0	7512900	165310000	475370000	39116000	70865000
AT5G60980	9899500	0	0	0	0	0	0	0	0	0	0	0	0	0	0	0	0	0	7040200	0	0	0	0	15297000	9960900	8375800	15561000	0	24173000	0	0	0	0	0	0	6101000	12208000	4801600	12927000	10485000
AT5G61170.1	36605000	167590000	23619000	85595000	166320000	253760000	74356000	51688000	41299000	49028000	80174000	174690000	36728000	27332000	62802000	0	359480000	485670000	95162000	199880000	0	75322000	517170000	133410000	134890000	238170000	0	42282000	169090000	0	0	107370000	537000000	435840000	96107000	9176600	21570000	17278000	100230000	112990000
AT5G61410	0	0	0	0	13731000	0	12036000	0	0	0	0	0	12872000	14394000	0	0	0	10463000	0	0	0	0	0	0	0	0	0	0	0	0	0	0	0	0	0	0	0	0	0	0
AT5G61780	47013000	0	0	0	9659500	13285000	18776000	20292000	0	0	0	23375000	13746000	15008000	0	0	0	17908000	16482000	0	0	0	17125000	12474000	9490300	0	6653300	0	25003000	0	0	0	0	4297500	0	24282000	16363000	16799000	16326000	17998000
AT5G61790	36964000	0	13543000	0	18427000	10782000	17902000	0	0	0	0	23427000	15415000	0	0	0	0	0	0	0	0	0	18580000	24440000	25327000	0	12995000	0	0	0	0	0	14202000	0	0	37380000	38561000	26923000	15835000	17561000
AT5G62190	6590900	0	0	0	0	0	0	0	0	0	0	0	0	0	0	0	0	0	0	0	0	0	0	0	0	0	0	0	0	0	0	0	0	0	0	15043000	0	0	0	3705000
AT5G62270	112350000	0	7026200	0	3521200	17325000	26320000	0	0	0	0	28494000	29997000	0	0	0	0	34571000	134130000	0	6603700	0	7070400	126420000	14773000	0	11752000	0	0	0	0	0	10162000	13978000	0	67449000	0	6791700	0	35127000
AT5G62300.2;AT5G62300.1;AT3G45030.1	0	52332000	0	59601000	334710000	218470000	120420000	0	0	265470000	159100000	91442000	44329000	0	0	0	466570000	461840000	73735000	178560000	0	509160000	333210000	136210000	128120000	179370000	0	125200000	0	0	0	64620000	485180000	376370000	34334000	0	15695000	0	150540000	424640000
AT5G62390	715630000	0	0	0	0	102020000	0	0	0	0	0	169850000	13835000	0	0	0	0	150050000	0	0	29121000	0	102980000	20767000	0	0	0	0	108870000	0	0	0	0	35789000	130780000	0	0	32406000	0	11267000
AT5G62530	97666000	0	20154000	0	27684000	22077000	17319000	0	26557000	0	0	26553000	19369000	26685000	0	32267000	0	35772000	32263000	0	0	0	19354000	32700000	21191000	20604000	24183000	0	0	0	0	0	19196000	24507000	0	20331000	40268000	42437000	46286000	42427000
AT5G62700	40279000	0	0	0	19143000	0	15529000	0	0	0	0	0	8133700	0	0	0	0	0	12392000	0	0	0	15718000	28752000	32025000	14209000	14087000	0	0	0	0	0	14789000	10569000	0	65257000	0	17084000	22836000	24778000
AT5G62740	2121700	0	0	0	32639000	0	91570000	14620000	8449200	0	0	0	70213000	11169000	0	4395600	0	4064600	14089000	0	0	0	0	35778000	7770300	0	0	0	0	0	0	0	0	16694000	0	31121000	0	6115900	0	0
AT5G62790	1213500	0	0	0	0	0	0	0	0	0	0	0	4946800	0	0	0	0	0	0	0	0	0	0	0	0	0	0	0	0	0	0	0	0	0	0	4973500	0	0	0	0
AT5G63190	1482100	0	0	0	0	0	0	0	0	0	0	0	0	0	0	0	0	0	2291200	0	0	0	0	0	0	0	0	0	0	0	0	0	0	0	0	9895400	0	0	0	0
AT5G63310	0	0	14039000	0	18193000	0	16196000	0	0	0	0	0	12611000	0	0	0	0	0	0	0	0	0	0	0	0	0	0	0	0	0	0	0	0	0	0	0	0	0	0	0
AT5G63400	76546000	0	9741500	0	11985000	4047000	13765000	0	13166000	0	0	7279800	12029000	17392000	0	14865000	0	20950000	11936000	0	0	0	10751000	24285000	12361000	0	14663000	0	0	0	0	0	9117200	9328600	0	13284000	11796000	11455000	15507000	23987000
AT5G63570	0	0	0	0	0	0	9245000	0	0	0	0	9826900	0	0	0	0	0	6743600	0	0	0	0	0	0	0	0	0	0	0	0	0	0	0	0	0	0	0	0	0	0
AT5G63600	8169300	0	0	0	0	0	0	0	0	0	0	0	0	0	0	0	0	0	0	0	0	0	0	0	0	13438000	0	0	0	0	0	0	0	0	0	23016000	0	0	0	0
AT5G63680	14354000	0	0	0	0	0	0	0	0	0	0	0	0	0	0	0	0	0	4447800	0	0	0	0	4538300	0	0	0	0	0	0	0	0	3898600	0	0	11675000	0	3647800	0	3946300
AT5G63840	2525100	0	0	0	5088600	0	0	0	0	0	0	0	0	0	0	0	0	0	5756300	0	0	0	0	6885900	5976400	0	0	0	0	0	0	0	0	0	0	0	5175900	5904800	6039300	0
AT5G63890	5051800	0	0	0	6622000	0	9017400	0	0	0	0	5504200	6199500	6833900	0	0	0	8706700	0	0	0	0	0	4238800	4358700	0	0	0	0	0	0	0	0	2372200	0	5839400	3602300	5604400	0	0
AT5G63980	5685700	0	0	0	12296000	6879900	7781100	0	7650900	0	0	0	9243200	0	0	0	0	11906000	14407000	0	0	0	0	9028900	5581200	0	0	0	0	0	0	0	0	0	0	6079400	11630000	11660000	9009800	0
AT5G64040	0	0	0	0	14900000	0	14078000	0	0	0	0	0	9320300	12635000	0	0	0	0	0	0	0	0	0	0	0	0	0	0	0	0	0	0	0	0	0	0	0	0	0	0
AT5G64100	82730000	0	0	0	0	0	0	0	0	0	0	0	0	0	0	0	0	0	20648000	0	0	0	0	14167000	11570000	0	0	0	0	0	0	0	23710000	37051000	0	74247000	49017000	34590000	33005000	32539000
AT5G64120	7425400	0	0	0	0	0	79994000	0	0	0	0	10525000	17342000	5385700	0	0	0	6193600	0	0	0	0	0	0	0	0	0	0	0	0	0	0	0	2091300	0	26592000	0	9637300	5569400	7244500
AT5G64140.1	75635000	0	44577000	49245000	229200000	131580000	71488000	0	0	0	87023000	138060000	0	0	0	0	214700000	1055300000	60520000	115610000	0	352450000	609310000	310570000	77860000	140220000	0	0	0	0	0	0	445490000	211160000	57252000	0	18325000	0	75686000	144430000
AT5G64260	0	0	0	0	0	0	0	0	0	0	0	0	0	0	0	0	0	0	12346000	0	0	0	5307600	5899000	0	4325100	0	0	0	0	0	0	0	0	0	0	0	0	0	0
AT5G64370	26336000	0	12982000	0	305890000	0	81321000	2078800	0	0	0	2013000	193560000	22933000	0	1694800	0	6725500	1403600000	7619500	18948000	0	11662000	834960000	77685000	18534000	14078000	0	0	349730000	0	0	21186000	16719000	0	340530000	118120000	43591000	18846000	18360000
AT5G64440	2026300	0	0	0	5197600	0	0	0	0	0	0	0	5568900	0	0	0	0	0	5576300	0	0	0	0	5745800	4240800	0	0	0	0	0	0	0	0	4076000	0	5659700	4333800	6642000	0	0
AT5G64650.1	0	0	0	0	0	0	0	0	0	0	0	0	0	0	0	0	0	0	0	0	0	0	0	11470000	0	0	0	0	0	0	0	0	0	0	0	11347000	16351000	0	0	0
AT5G64670.1	0	20483000	58066000	0	0	0	54557000	11169000	0	0	34101000	0	49340000	0	0	0	11440000	7702100	0	0	0	0	0	443390000	0	18602000	0	0	0	0	0	18115000	0	0	0	146050000	260040000	13419000	18986000	45037000
AT5G65010	0	0	0	0	12102000	12966000	27093000	19749000	0	0	0	11422000	12071000	15534000	0	0	0	12380000	0	0	0	0	0	0	0	0	0	0	0	0	0	0	0	0	0	11711000	0	0	0	0
AT5G65020	283200000	0	0	0	16175000	8002800	22560000	0	0	0	0	10670000	9758400	2837200	0	0	0	8381900	37197000	0	0	0	7480100	113630000	46574000	29010000	31786000	0	40697000	0	0	0	5474100	42879000	11519000	488940000	73887000	59445000	91863000	139440000
AT5G65220.1	191580000	2416200000	1039700000	12498000	275020000	27492000	1656000000	403220000	196820000	175620000	202690000	27725000	1008600000	137290000	176540000	0	171970000	0	0	0	0	0	0	102150000	0	2770200	0	0	0	46716000	0	0	0	0	0	68214000	46359000	10015000	5857400	0
AT5G65430	20000000	0	0	0	9402500	0	9509300	12958000	0	0	0	11160000	0	9101700	0	0	0	10553000	14319000	0	0	0	0	13585000	20801000	0	7276800	0	0	0	0	0	0	11094000	0	8605100	15456000	12782000	0	16604000
AT5G65620	5509400	0	0	0	7978000	0	7075700	8179900	0	0	0	0	0	0	0	0	0	5169000	7147700	0	0	0	0	7553100	0	0	0	0	0	0	0	0	0	0	0	0	0	0	0	8745300
AT5G65720	3999000	0	0	0	0	0	0	0	0	0	0	0	7539000	0	0	0	0	0	0	0	0	0	0	4893000	0	0	0	0	0	0	0	0	0	0	0	30741000	0	0	0	7009300
AT5G65750	2072400	0	0	0	33553000	3635800	7984600	0	0	0	0	0	9675700	5229000	0	0	0	6752200	11713000	0	0	0	0	15241000	0	0	0	0	0	0	0	0	0	0	0	0	0	0	0	0
AT5G66040	0	0	0	0	0	0	0	0	0	0	0	11344000	7379100	0	0	0	0	0	0	0	0	0	0	0	6943700	0	0	0	0	0	0	0	0	0	0	0	0	8149400	0	0
AT5G66120	27341000	0	0	0	5906400	6839400	14071000	0	0	0	0	7453700	5684200	0	0	0	0	0	8151000	0	0	0	0	10023000	7798300	0	3742800	0	6215100	0	0	0	0	6050600	0	78594000	17523000	14980000	17578000	24359000
AT5G66140	4166900	0	0	0	6509700	0	0	0	0	0	0	2597400	8971000	7507300	0	0	0	5384800	7478200	0	0	0	0	7719800	3753900	0	0	0	0	0	0	0	0	3201500	0	7451200	0	7429500	5616800	4736200
AT5G66190	0	30033000	69768000	23309000	112680000	46114000	39796000	35236000	34506000	0	0	27073000	66695000	60441000	31209000	50743000	0	45787000	0	0	0	0	0	0	0	0	0	0	0	0	0	0	0	0	0	0	0	0	0	0
AT5G66390	20219000	0	0	0	0	0	0	0	0	0	0	0	0	0	0	0	0	0	7228800	0	0	0	11048000	10123000	7647400	0	0	0	0	0	0	0	0	12154000	0	36434000	12001000	7127300	17090000	11386000
AT5G66420	0	0	0	0	22452000	0	5368900	0	0	0	0	3908000	5867300	4839600	0	0	0	0	6823200	0	0	0	0	4757300	4482000	0	0	0	0	0	0	0	0	0	0	9130000	4171000	4491500	0	0
AT5G66570	0	0	0	0	76554000	47491000	0	0	0	0	0	48942000	27339000	0	0	0	0	29569000	0	0	0	0	0	0	0	0	0	0	0	0	0	0	0	0	0	0	0	0	0	0
AT5G66680	75836000	0	0	0	7711500	0	14038000	0	0	0	0	5212100	23649000	8008500	0	0	0	0	11297000	0	0	0	0	18459000	7971400	7401300	7289700	0	0	0	0	0	7254200	12501000	0	83382000	9797000	11276000	18373000	31353000
AT5G66760	75641000	0	0	0	9850300	13632000	15955000	19079000	0	0	0	13039000	18818000	0	0	0	0	22429000	14582000	0	7542800	0	0	25056000	13490000	0	16646000	0	33020000	0	0	0	0	20779000	0	46873000	17085000	12118000	22810000	20301000
AT5G66860.1	14974000	88084000	70266000	0	27048000	0	51791000	86293000	0	0	49364000	7288600	140170000	28429000	38076000	0	26500000	10720000	23449000	38796000	0	58929000	0	191060000	48388000	33202000	0	68999000	0	148750000	62184000	67775000	18225000	41135000	0	184050000	253450000	63792000	42228000	53023000
AT5G67500	34430000	0	0	0	24308000	16783000	20284000	0	0	0	0	19541000	17979000	3349200	0	0	0	15693000	16481000	0	0	0	0	21645000	10600000	9596500	0	0	0	0	0	0	21237000	31730000	7348300	136930000	17084000	25768000	7352300	29209000
AT5G67510.1	0	0	0	0	0	0	0	59861000	38746000	0	16859000	0	11249000	0	0	0	16762000	0	0	26965000	0	19519000	0	16709000	0	19912000	0	0	0	0	0	0	37322000	0	0	0	50637000	0	0	17864000
ATCG00020	0	0	40278000	19201000	189570000	70129000	98972000	57922000	35831000	0	19803000	112770000	293030000	75405000	34852000	59735000	0	101260000	3376600	0	0	0	0	4763900	0	0	0	0	0	0	0	0	0	0	0	14008000	0	3600200	0	0
ATCG00120	13819000	153830000	508950000	261490000	4290100000	614990000	1454200000	752760000	144360000	61699000	321930000	630470000	2138300000	1235000000	317170000	296400000	0	788740000	12980000	0	0	0	0	72161000	21236000	5412100	0	0	0	0	0	0	0	0	0	8811800	5229800	10505000	0	0
ATCG00130	0	0	0	0	239260000	18883000	110400000	15647000	0	0	0	25657000	163750000	37416000	0	21689000	0	36916000	0	0	0	0	0	9115100	0	0	0	0	0	0	0	0	0	0	0	0	0	0	0	0
ATCG00160.1	88124000	254970000	39627000	1360600000	652430000	1263100000	142130000	34263000	26775000	23540000	225670000	759390000	131840000	73699000	240090000	0	465200000	61681000	0	5415100	0	21343000	111540000	5624100	4368800	0	0	2699800	0	0	0	10278000	7633600	20025000	16820000	0	582510	5533500	751560	1262900
ATCG00190	0	0	0	0	7511100	0	8023800	0	0	0	0	0	15291000	0	0	0	0	0	0	0	0	0	0	0	0	0	0	0	0	0	0	0	0	0	0	0	0	0	0	0
ATCG00270	0	24243000	43129000	0	152740000	79968000	96547000	23757000	33623000	0	0	66754000	214700000	114030000	42150000	49754000	0	74913000	0	0	0	0	0	0	0	0	0	0	0	0	0	0	0	0	0	4854900	0	0	0	0
ATCG00280	0	16902000	33302000	20577000	127850000	70360000	99771000	58955000	28182000	0	57641000	69084000	239100000	109590000	68312000	65255000	0	110080000	0	0	0	0	0	0	3585400	0	0	0	0	0	0	0	0	0	0	7180400	0	0	0	0
ATCG00330.1	73525000	61262000	0	336400000	234300000	395480000	92774000	0	0	0	165500000	208120000	75069000	22587000	63795000	0	137160000	34573000	0	0	0	0	47281000	0	0	0	0	0	0	0	0	0	0	0	7277300	0	0	0	0	0
ATCG00340	0	0	11690000	0	145780000	17937000	51886000	14840000	9643600	0	0	18620000	269700000	74797000	9569100	25090000	0	43000000	0	0	0	0	0	0	0	0	0	0	0	0	0	0	0	0	0	2885600	0	0	0	0
ATCG00350	0	0	0	0	115240000	20821000	39105000	21832000	0	0	0	30419000	344840000	84153000	29044000	14057000	0	38728000	0	0	0	0	0	0	0	0	0	0	0	0	0	0	0	0	0	3414900	0	0	0	0
ATCG00380.1	241190000	392750000	81000000	907930000	635630000	1289300000	346670000	65215000	106630000	88623000	333010000	662310000	120560000	49999000	187940000	0	432060000	63808000	0	0	0	0	169410000	5954400	0	17115000	0	0	0	0	0	21753000	0	0	14133000	0	0	0	9552100	16217000
ATCG00470	0	6936300	34843000	10684000	511660000	15766000	163130000	52635000	24459000	0	14622000	17141000	284440000	96743000	31365000	42962000	0	38489000	0	0	0	0	0	0	0	0	0	0	0	0	0	0	0	0	0	1353000	0	0	0	0
ATCG00480	21987000	281820000	1065600000	481090000	8008300000	734370000	2306700000	946230000	603570000	261640000	300320000	542900000	4908000000	2048300000	866400000	1030100000	0	986410000	18095000	0	3380200	0	1699100	115940000	29876000	3515300	5010400	0	9477100	4051200	0	0	675020	8121300	0	25222000	1496000	11641000	0	13211000
ATCG00490.1;ATMG00280.1;AT2G07732.1	6464200000	12796000000	8172900000	26885000000	10643000000	15509000000	11010000000	8789700000	8371700000	9955700000	18647000000	18195000000	14643000000	9072100000	14612000000	0	16989000000	997480000	48744000	225100000	0	308750000	736820000	537050000	302990000	377420000	0	416930000	63963000	8903400	54364000	151920000	187730000	125540000	191220000	206810000	234020000	146340000	163460000	154340000
ATCG00500	13334000	0	0	0	8363600	0	11594000	0	0	0	0	0	12990000	6911100	0	0	0	6100600	0	0	0	0	0	7996100	5382500	0	0	0	9522600	0	0	0	0	7003600	0	25513000	0	5883300	0	11263000
ATCG00540	0	0	8257300	0	18922000	12324000	22015000	25062000	13800000	0	25065000	24314000	31878000	29291000	0	0	0	21007000	0	0	0	0	0	0	11789000	0	0	0	0	0	0	0	0	0	0	0	0	0	0	0
ATCG00640.1	74158000	399690000	291680000	8852400	95049000	0	471340000	83888000	48485000	74728000	48429000	15533000	415100000	42089000	68207000	0	38358000	0	0	0	0	0	0	47247000	0	0	0	0	0	0	0	0	0	0	0	17705000	8934800	0	0	21090000
ATCG00650.1	0	29688000	0	35244000	38547000	62649000	0	0	0	0	168070000	54272000	0	20713000	0	0	0	0	0	0	0	0	0	0	0	0	0	0	0	0	0	0	0	0	0	0	0	0	0	0
ATCG00660.1	205060000	1453200000	666860000	17457000	225110000	0	1161300000	329790000	173430000	173510000	292820000	50786000	809160000	101650000	135390000	0	109920000	0	0	0	0	0	0	172500000	0	16554000	0	0	0	133990000	0	0	0	0	0	83521000	52229000	0	0	0
ATCG00670	11817000	0	0	0	0	0	13000000	0	0	0	0	0	0	0	0	0	0	0	0	0	0	0	0	0	0	0	0	0	0	0	0	0	0	0	0	0	0	0	4838800	0
ATCG00680	2075400	6600700	19994000	12245000	307350000	73381000	211550000	51104000	22018000	0	13034000	82323000	775600000	190400000	66134000	97240000	0	188690000	934610	0	0	0	0	4543000	1378900	0	0	0	8243200	0	0	0	0	1991900	0	12130000	0	954210	0	0
ATCG00740.1	0	0	0	19881000	2562100	5575000	0	0	0	0	3540300	0	0	0	0	0	3442100	0	0	0	0	0	0	0	0	0	0	0	0	0	0	0	0	0	0	0	0	0	0	0
ATCG00750.1	50456000	37096000	0	92511000	196480000	224390000	47759000	0	0	96036000	152040000	124830000	46817000	0	49540000	0	126650000	0	0	0	0	0	37526000	0	0	0	0	0	0	0	0	0	0	0	0	0	0	0	0	0
ATCG00770.1	93741000	199330000	41867000	681670000	299150000	795730000	152190000	0	83418000	73982000	217960000	492760000	98804000	62447000	180800000	0	264470000	50370000	0	0	0	17014000	145410000	0	0	0	0	0	0	0	0	0	0	0	22749000	0	0	0	0	0
ATCG00780.1	298200000	3589700000	1221700000	65513000	433140000	25473000	1278300000	504620000	205770000	128440000	335610000	40746000	1679500000	122790000	336850000	0	243130000	24325000	0	0	0	9052200	0	274450000	13428000	8591000	0	0	0	48771000	0	0	8168000	0	4728000	74465000	96130000	4539100	0	7367800
ATCG00790.1;AT2G28830.1	302630000	1756400000	1091800000	24110000	464790000	14459000	1602300000	638340000	181720000	82840000	303520000	27439000	1902700000	264280000	229720000	0	286270000	18373000	0	5929100	0	25225000	0	152240000	25105000	20546000	0	41678000	0	0	29299000	9916600	9446900	23084000	0	4969000	33265000	0	8653800	13503000
ATCG00800.1	247220000	564030000	136530000	1477300000	800140000	1486500000	546230000	123310000	171660000	239570000	741750000	1581400000	280280000	129820000	245970000	0	583120000	113520000	0	0	0	0	162250000	16629000	0	37875000	0	34683000	0	0	0	19490000	2530700	0	18528000	1380500	2909000	0	11122000	44562000
ATCG00810.1	209760000	1835300000	715280000	11852000	155000000	8059100	712540000	380640000	95460000	101700000	99046000	20499000	592960000	108740000	126090000	0	134860000	9962500	0	0	0	0	0	85805000	0	0	0	0	0	16522000	0	0	0	0	0	44768000	31603000	0	0	0
ATCG00820.1	49662000	165410000	0	764030000	162500000	682690000	188870000	26326000	94358000	0	311780000	572660000	38352000	0	118100000	0	207800000	44848000	0	0	0	10097000	60268000	0	0	0	0	0	0	0	0	0	0	0	13759000	0	0	0	0	8934200
ATCG01020.1	60743000	805160000	390450000	0	112000000	0	413390000	63930000	67722000	43207000	60412000	0	595790000	0	0	0	30288000	6340100	0	0	0	0	0	44451000	0	0	0	0	0	0	0	0	0	0	0	22363000	16317000	0	0	0
ATCG01060	0	0	25311000	3310600	206270000	49361000	70123000	24493000	0	0	0	40802000	261790000	101950000	36195000	34773000	0	58890000	0	0	0	0	0	0	0	0	0	0	0	0	0	0	0	0	0	0	0	0	0	0
ATCG01110	0	0	0	0	5047100	0	5478200	0	0	0	0	0	6670500	0	0	0	0	0	0	0	0	0	0	0	0	0	0	0	0	0	0	0	0	0	0	0	0	0	0	0
ATCG01120.1	21712000	20159000	0	72296000	77212000	135780000	40333000	0	0	0	168880000	121140000	17033000	0	0	0	123850000	11062000	0	0	0	0	41682000	0	0	12198000	0	0	0	0	0	0	0	0	0	0	0	0	0	5719900
ATCG01130	0	0	0	0	27810000	0	38180000	0	0	0	0	0	35215000	0	0	0	0	5031300	0	0	0	0	0	0	0	0	0	0	0	0	0	0	0	0	0	10753000	0	0	0	0
ATCG01230.1;ATCG00905.1;ATCG00065.1	0	0	0	58310000	91660000	141590000	0	0	0	0	0	108750000	0	0	0	0	37396000	0	0	0	0	0	41571000	0	0	0	0	0	0	0	0	0	0	0	0	0	0	0	0	0
ATCG01240.1;ATCG00900.1	82822000	252490000	52677000	1056100000	245260000	1016200000	245860000	72568000	129410000	124000000	348390000	715420000	201210000	106140000	190280000	0	176310000	70769000	0	0	0	0	60915000	12300000	0	8244900	0	0	0	0	0	0	9209000	0	6421000	0	0	0	0	18573000
ATCG01300.1;ATCG00840.1	77460000	589340000	266840000	0	69803000	0	274980000	124100000	0	0	32086000	8397200	226010000	57631000	73794000	0	44653000	0	0	0	0	0	0	23927000	0	0	0	0	0	0	0	0	0	0	0	23073000	8559300	0	0	0
ATCG01310.1;ATCG00830.1	492000000	3906000000	1362500000	64933000	399400000	30116000	2444900000	605180000	347850000	97555000	511780000	36667000	1465500000	226830000	343220000	0	418140000	18211000	13138000	0	0	0	0	275550000	13256000	41701000	0	0	0	167230000	0	0	0	0	0	53406000	71818000	0	2834000	14207000
ATMG00070	14873000	0	0	0	14942000	0	13314000	0	0	0	0	0	23766000	0	0	0	0	0	10427000	0	0	0	0	20063000	5672800	0	0	0	0	0	0	0	0	6003200	0	19199000	0	6356900	0	12380000
ATMG00090.1	0	0	0	0	15935000	6725800	0	0	0	0	26189000	0	0	0	0	0	8744000	36874000	0	0	0	0	52199000	10261000	0	0	0	0	0	0	0	0	0	0	24527000	0	0	0	0	17980000
ATMG00210.1;AT2G07725.1	0	0	0	0	0	0	0	0	0	0	11986000	0	0	0	0	0	10234000	0	0	0	0	0	0	50844000	0	0	0	0	0	0	0	0	0	0	0	15051000	78557000	0	0	0
ATMG00290.1;AT2G07734.1	0	0	0	0	0	11726000	0	0	0	0	0	18699000	0	0	0	0	14485000	28127000	0	0	0	0	30996000	22216000	0	0	0	0	0	0	0	0	7822800	0	25858000	0	0	0	12840000	25049000
ATMG00480	36070000	0	0	0	59636000	0	59592000	0	0	0	0	0	39592000	0	0	0	0	12475000	0	0	0	0	0	100500000	12908000	0	6897800	0	0	0	0	0	0	9584100	0	69588000	8314800	7125600	0	29283000
ATMG00510	9633600	0	0	0	19829000	0	10341000	0	0	0	0	0	0	0	0	0	0	0	0	0	0	0	0	13317000	0	0	0	0	0	0	0	0	0	0	0	0	0	0	0	10323000
ATMG00560.1;AT2G07715.1	0	18973000	30763000	0	14299000	0	22342000	0	0	0	28636000	0	28586000	0	0	0	12207000	4451300	10799000	13980000	0	10051000	0	197450000	18929000	18533000	0	0	0	0	0	6621100	24879000	0	0	30277000	169150000	0	10866000	32272000
ATMG00640	54500000	0	0	0	71542000	0	60284000	0	0	0	0	18984000	83685000	0	0	0	0	0	0	0	0	0	0	44943000	19449000	0	25519000	0	0	0	0	0	0	0	0	79857000	32333000	17433000	0	0
ATMG01190	648680000	0	44760000	11681000	957080000	50027000	1146900000	208190000	36223000	10228000	28421000	160280000	1623700000	335670000	84630000	86508000	0	115080000	208650000	5452500	17979000	0	93390000	1148700000	370510000	119040000	116850000	0	220280000	328700000	0	0	67558000	86909000	66767000	876630000	408400000	561250000	175340000	333170000
ATMG01270.1;AT2G07696.1	0	0	0	0	16488000	0	0	0	0	0	36475000	9992200	0	0	0	0	24304000	12185000	0	0	0	26506000	15199000	9911400	0	0	0	54748000	0	0	0	7036800	0	31471000	9152300	0	0	0	7582900	24124000
CON__ENSEMBL:ENSBTAP00000007350	7503700	0	97522000	43998000	22584000	35925000	18474000	41524000	0	0	0	42476000	12526000	14691000	42004000	70930000	0	8118200	14517000	25957000	0	0	0	0	18017000	22027000	23489000	0	21930000	0	0	0	52282000	24699000	0	6007400	48810000	10603000	81740000	15154000
CON__ENSEMBL:ENSBTAP00000018574	0	16784000	28094000	14282000	0	11815000	0	0	8573800	0	0	11518000	0	0	0	23784000	0	0	0	0	18187000	0	0	0	0	0	13901000	0	0	0	0	0	19830000	6607500	0	0	0	0	22364000	0
CON__ENSEMBL:ENSBTAP00000031360	46747000	135780000	246870000	158130000	86268000	180770000	41244000	66949000	139300000	116820000	110500000	131110000	35447000	45265000	155160000	246470000	0	21935000	52877000	57982000	154610000	0	0	12103000	71232000	91613000	132580000	0	53910000	0	257200000	154960000	136580000	78839000	58559000	19193000	318830000	35172000	125470000	55427000
CON__P00711	2921900	0	0	0	8964700	0	0	0	0	0	0	0	0	0	0	0	0	0	0	0	0	0	0	0	0	0	0	0	0	0	0	0	0	2156700	0	0	0	0	0	0
CON__P00735	7439800	0	0	0	0	0	0	0	0	0	0	13222000	0	0	0	0	0	0	0	0	0	0	0	0	0	0	0	0	0	0	0	0	0	0	0	0	0	0	17003000	0
CON__P00978	0	0	21199000	7590400	5527700	8556100	0	0	0	0	0	7404800	0	0	0	11396000	0	0	0	0	9913800	0	0	0	0	7922900	7329500	0	0	0	0	0	17882000	4085200	0	0	12343000	0	16030000	3941600
CON__P02662;CON_P02662	137290000	65897000	118060000	86942000	37764000	110490000	0	28677000	57153000	0	0	105700000	0	39397000	0	97241000	0	36013000	64583000	42554000	61390000	333610000	590620000	27169000	29936000	39723000	48713000	613950000	0	0	96501000	0	82933000	25258000	0	0	82858000	44686000	76104000	31932000
CON__P02663;CON_P02663	11105000	0	24265000	20257000	13228000	25621000	0	17266000	0	0	0	38842000	0	0	0	0	0	9743200	18341000	0	13239000	0	0	7697000	16791000	0	17086000	0	0	0	0	0	0	0	0	0	27357000	15151000	0	14910000
CON__P02666;CON_P02666	88695000	33703000	66023000	67274000	27927000	78628000	0	0	31721000	0	0	26894000	0	0	10568000	40130000	0	24802000	17048000	10959000	23600000	0	83549000	13240000	5868700	0	17774000	0	40543000	0	0	0	34037000	20661000	39663000	0	30332000	4243500	43260000	28233000
CON__P02668;CON_P02668	27423000	18556000	46743000	0	11976000	60393000	9932100	22552000	36201000	0	0	22363000	0	20216000	19235000	44705000	0	15229000	21372000	10617000	21329000	0	201060000	11839000	8369500	23408000	22952000	209330000	50443000	0	0	22330000	46923000	27659000	34223000	3676500	24115000	7839800	33034000	11987000
CON__P02672	2047100	0	23885000	0	7953500	11082000	0	0	0	0	0	0	0	0	0	0	0	0	0	0	11475000	0	0	0	0	0	0	0	0	0	0	0	0	0	0	0	0	0	0	0
CON__P02754	64417000	28217000	51627000	37535000	73757000	54528000	11790000	21263000	26415000	0	0	25665000	0	18314000	0	48899000	0	20296000	22004000	29223000	56156000	157720000	254790000	23320000	16015000	25019000	23262000	143200000	52633000	0	0	0	40259000	29084000	27775000	0	32115000	13964000	37334000	19829000
CON__P02768-1	24698000	57100000	198390000	0	13793000	0	0	0	0	0	0	65319000	0	0	0	0	0	0	0	0	0	0	0	0	26770000	0	37299000	0	0	0	0	0	45229000	0	0	14176000	52773000	0	0	0
CON__P07477	89809000	1080700000	1549800000	971770000	51703000	111650000	321030000	673970000	35125000	103370000	83788000	1830600000	39062000	590820000	890780000	1389600000	0	12700000	28456000	0	586580000	262860000	3260900000	48649000	417190000	464750000	46203000	413830000	0	176000000	0	0	49162000	265650000	463150000	0	1149600000	43445000	1309000000	40403000
CON__P17690	37105000	70690000	189620000	114190000	55199000	84619000	32344000	90214000	125780000	124090000	0	34347000	31846000	35564000	102930000	147950000	0	23349000	42981000	54308000	91100000	0	0	16033000	27345000	97393000	91483000	0	47422000	0	0	115500000	128590000	53384000	37390000	14432000	144150000	12868000	151740000	50353000
CON__P41361	33271000	93953000	296610000	63484000	24260000	96055000	0	42539000	72239000	125700000	0	61003000	15427000	20907000	83515000	161280000	0	8166800	16527000	38695000	117190000	0	0	9642700	24785000	38878000	60637000	0	27376000	0	0	85287000	135360000	25442000	33012000	11095000	95742000	19555000	248490000	28030000
CON__P50448	0	0	0	0	0	4471300	0	0	0	0	0	0	0	0	0	0	0	0	0	20975000	8035500	0	0	0	0	0	0	0	0	0	0	0	0	0	0	0	0	0	0	0
CON__Q29443;CON__Q0IIK2	0	0	0	15125000	19375000	25558000	0	0	0	0	0	24944000	0	0	0	0	0	0	10204000	0	0	0	0	0	11198000	0	0	0	0	0	0	0	0	0	0	0	80126000	0	0	0
CON__Q2UVX4	87824000	332220000	452130000	280240000	143280000	319210000	62908000	87706000	177660000	262380000	231810000	205870000	24671000	58112000	127690000	280490000	0	43414000	83965000	144930000	319430000	0	0	34396000	123580000	118350000	184710000	0	66604000	0	300740000	267980000	315800000	170430000	102510000	16930000	434970000	29331000	207280000	97233000
CON__Q3SZR3	681340000	1900500000	3338100000	2177000000	1363300000	2289800000	502750000	948260000	1583200000	2376000000	1327400000	2000600000	486850000	437680000	1144200000	2840900000	0	337160000	821530000	988790000	2854600000	0	0	252950000	795140000	1118700000	1779700000	0	504280000	167160000	725770000	258850000	2237800000	1153600000	573160000	257420000	3832100000	502440000	2695000000	826750000
CON_P00761;CON__P00761	11870000000	5940500000	9196600000	4877700000	3442400000	7508800000	1610600000	4362100000	5559700000	5384300000	5837100000	7785500000	1298700000	3818100000	4817800000	8114000000	142000000000	2782000000	4603800000	3065900000	5576700000	39989000000	14395000000	2062700000	2349000000	3478300000	4449600000	82707000000	9646000000	1219300000	3889900000	2571600000	7352500000	3478900000	8095700000	941270000	7700100000	4238600000	7077300000	3420600000
CON_P02533;CON_Q53XY3;CON__P02533;CON__Q6IFX2;CON__Q61782	8797900	543670000	74987000	0	0	0	0	27104000	0	0	0	16894000	0	0	24633000	52186000	0	13192000	5750600	0	14252000	96026000	34183000	11138000	12137000	0	16603000	0	0	0	6060800	0	2568700	13607000	55652000	0	46904000	22145000	0	0
CON_P02769;CON__P02769	324000000000	507000000000	783000000000	456000000000	254000000000	499000000000	126000000000	293000000000	440000000000	471000000000	284000000000	324000000000	130000000000	152000000000	387000000000	544000000000	10420000000	105000000000	174000000000	234000000000	530000000000	15094000000	2269000000	88445000000	171000000000	260000000000	292000000000	9585100000	158000000000	21867000000	342000000000	298000000000	453000000000	317000000000	192000000000	79176000000	618000000000	113000000000	460000000000	172000000000
CON_P08779;CON__P08779;CON__Q9Z2K1;CON__Q3ZAW8;CON__A2A4G1;CON__P19001;CON_P35900;CON__P35900;CON__Q9D312;CON__Q8N1A0	0	626500000	19785000	0	0	0	0	37339000	0	0	0	9194600	0	0	0	59918000	0	0	0	0	0	0	31534000	13673000	7543600	0	0	0	0	0	0	0	0	0	58471000	6096600	1914100	0	0	0
CON_P35527;CON__P35527	745830000	383750000	590130000	377580000	128090000	296890000	201870000	145060000	147220000	248040000	407550000	713590000	78117000	110540000	309440000	23917000	0	311180000	137330000	98710000	493350000	1400100000	1035200000	255160000	619790000	329290000	187520000	978910000	402910000	0	138910000	0	524120000	182870000	647520000	124480000	160450000	128050000	298690000	103990000
CON_Q4VAQ2	6898800	0	103620000	0	0	0	0	0	0	28035000	0	16135000	0	0	0	0	0	2518800	8793300	0	0	0	0	6853400	20963000	0	2591000	0	11710000	0	87970000	0	51655000	0	0	0	108960000	0	0	0
CON_Q6GSJ0;CON_P04264;CON__P04264;CON__H-INV:HIT000016045	787080000	4354700000	2889500000	405030000	219230000	530920000	230400000	268200000	187910000	664170000	788220000	1188300000	89146000	177670000	487620000	1654700000	0	447820000	278560000	150580000	487760000	3862400000	928940000	359680000	600540000	236330000	270370000	4148600000	373530000	0	765140000	106900000	603060000	335380000	684050000	149150000	529450000	270730000	231660000	134180000
CON_Q6PI71;CON__P13647;CON_P13647;CON__P07744;CON__Q9DCV7;CON__Q9H552;CON__REFSEQ:XP_932229	4867300	294050000	0	0	0	0	0	0	0	0	0	42648000	0	0	0	0	0	0	0	0	0	0	0	0	0	0	0	0	0	0	0	0	0	0	0	0	0	0	0	0
CON_Q8N175;CON__P13645;CON_P13645;CON_Q7Z3Y7;CON__Q148H6;CON__Q7Z3Y7;CON__P05784;CON_Q7Z3Z0;CON__Q7Z3Z0;CON_Q7Z3Y8;CON__Q7Z3Y8;CON__Q2M2I5;CON_P05783;CON_Q5U0N8;CON_Q53G38;CON_Q7Z3Y9;CON__Q7Z3Y9	352270000	1558200000	2295000000	54523000	60239000	97424000	20412000	43126000	49335000	113710000	79800000	221750000	17508000	28781000	66475000	510430000	0	95570000	20597000	35752000	71607000	730440000	69225000	121490000	20577000	62799000	86823000	144840000	0	0	0	0	340980000	0	144750000	52763000	191570000	0	27298000	14452000

## Sheet: A2 (Treatments_1)
ID	Genotype	Organ	Temperature	Subunit
reil1.1reil2.2_L_20°C_60S80S	reil1.1reil2.2	L	20°C	60S80S
reil1.1reil2.2_L_20°C_50S	reil1.1reil2.2	L	20°C	50S
reil1.1reil2.2_L_20°C_60S	reil1.1reil2.2	L	20°C	60S
reil1.1reil2.2_L_20°C_30S40S	reil1.1reil2.2	L	20°C	30S40S
reil1.1reil2.2_L_20°C_P	reil1.1reil2.2	L	20°C	P
Col-0_L_10°C_30S40S	Col-0	L	10°C	30S40S
Col-0_L_10°C_50S	Col-0	L	10°C	50S
Col-0_L_10°C_60S	Col-0	L	10°C	60S
Col-0_L_10°C_60S80S	Col-0	L	10°C	60S80S
Col-0_L_10°C_80S	Col-0	L	10°C	80S
Col-0_L_10°C_P	Col-0	L	10°C	P
reil1.1reil2.2_L_10°C_30S40S	reil1.1reil2.2	L	10°C	30S40S
reil1.1reil2.2_L_10°C_50S	reil1.1reil2.2	L	10°C	50S
reil1.1reil2.2_L_10°C_60S	reil1.1reil2.2	L	10°C	60S
reil1.1reil2.2_L_10°C_60S80S	reil1.1reil2.2	L	10°C	60S80S
reil1.1reil2.2_L_10°C_80S	reil1.1reil2.2	L	10°C	80S
reil1.1reil2.2_L_10°C_P	reil1.1reil2.2	L	10°C	P
Col-0_R_20°C_40S	Col-0	R	20°C	40S
Col-0_R_20°C_60S	Col-0	R	20°C	60S
Col-0_R_20°C_60S80S	Col-0	R	20°C	60S80S
Col-0_R_20°C_80S	Col-0	R	20°C	80S
Col-0_R_20°C_P	Col-0	R	20°C	P
reil1.1reil2.2_R_20°C_40S	reil1.1reil2.2	R	20°C	40S
reil1.1reil2.2_R_20°C_50S	reil1.1reil2.2	R	20°C	50S
reil1.1reil2.2_R_20°C_60S	reil1.1reil2.2	R	20°C	60S
reil1.1reil2.2_R_20°C_60S80S	reil1.1reil2.2	R	20°C	60S80S
reil1.1reil2.2_R_20°C_80S	reil1.1reil2.2	R	20°C	80S
reil1.1reil2.2_R_20°C_P	reil1.1reil2.2	R	20°C	P
Col-0_R_10°C_40S	Col-0	R	10°C	40S
Col-0_R_10°C_50S	Col-0	R	10°C	50S
Col-0_R_10°C_60S	Col-0	R	10°C	60S
Col-0_R_10°C_60S80S	Col-0	R	10°C	60S80S
Col-0_R_10°C_80S	Col-0	R	10°C	80S
Col-0_R_10°C_P	Col-0	R	10°C	P
reil1.1reil2.2_R_10°C_40S	reil1.1reil2.2	R	10°C	40S
reil1.1reil2.2_R_10°C_50S	reil1.1reil2.2	R	10°C	50S
reil1.1reil2.2_R_10°C_60S	reil1.1reil2.2	R	10°C	60S
reil1.1reil2.2_R_10°C_60S80S	reil1.1reil2.2	R	10°C	60S80S
reil1.1reil2.2_R_10°C_80S	reil1.1reil2.2	R	10°C	80S
reil1.1reil2.2_R_10°C_P	reil1.1reil2.2	R	10°C	P

## Sheet: A3 (Dataset_2)
	Col-0_R_20°C_40S	Col-0_R_20°C_50S	Col-0_R_20°C_60S	Col-0_R_20°C_60S80S	Col-0_R_20°C_80S	Col-0_R_20°C_P	Col-0_R_10°C_40S	Col-0_R_10°C_50S	Col-0_R_10°C_60S	Col-0_R_10°C_60S80S	Col-0_R_10°C_80S	Col-0_R_10°C_P	reil1.1reil2.1_R_20°C_40S	reil1.1reil2.1_R_20°C_50S	reil1.1reil2.1_R_20°C_60S	reil1.1reil2.1_R_20°C_60S80S	reil1.1reil2.1_R_20°C_80S	reil1.1reil2.1_R_20°C_P	reil1.1reil2.1_R_10°C_40S	reil1.1reil2.1_R_10°C_50S	reil1.1reil2.1_R_10°C_60S	reil1.1reil2.1_R_10°C_60S80S	reil1.1reil2.1_R_10°C_80S	reil1.1reil2.1_R_10°C_P
AT1G49240.1	0	0	0	0	0	0	0	0	0	0	0	0	0	0	0	0	0	0	0	279470	0	0	0	0
AT2G35040.2;AT2G35040.1	0	0	0	0	0	0	0	0	0	0	0	0	0	0	306090	0	0	0	0	0	0	0	0	0
AT2G36850.1	0	0	0	0	0	0	0	0	0	0	0	0	0	0	0	0	0	0	0	317040	0	0	0	0
AT2G43535.1	0	0	0	0	0	0	0	0	0	0	0	0	0	0	0	0	0	0	0	0	0	0	0	438150
AT4G08780.1	0	0	0	0	0	0	0	0	0	0	0	0	0	0	0	0	0	0	0	460840	0	0	0	0
AT1G16890.1;AT1G78870.2;AT1G16890.2;AT1G78870.1;AT1G16890.3	0	0	0	0	0	0	0	0	0	0	0	0	0	0	0	0	0	0	0	483610	0	0	0	0
AT3G46740.1	0	0	0	0	0	0	0	0	0	0	0	0	0	0	0	0	0	0	582150	0	0	0	0	0
AT1G70320.1;AT1G55860.2;AT1G55860.1	0	0	0	0	0	0	0	0	0	0	0	0	0	0	0	0	0	0	0	0	601700	0	0	0
AT5G23820.1	0	0	0	0	0	0	0	0	0	0	0	0	0	0	0	0	0	0	0	815630	0	0	0	0
AT2G42590.2;AT2G42590.1;AT2G42590.3	0	0	0	0	0	0	0	0	0	0	0	0	0	0	0	0	0	0	0	0	929500	0	0	0
AT3G60420.3;AT3G60420.1;AT3G60450.1;AT3G60420.2	0	0	0	0	0	0	0	0	0	0	0	0	0	0	0	0	0	0	0	0	974840	0	0	0
AT5G44800.1	0	0	0	0	0	0	0	0	0	0	0	0	0	0	0	0	0	0	0	1096400	0	0	0	0
AT3G52400.1	0	0	0	0	0	0	0	0	0	0	0	0	0	0	1241600	0	0	0	0	0	0	0	0	0
AT5G01530.1	0	0	0	0	0	0	0	0	0	0	0	0	1538500	0	0	0	0	0	0	0	0	0	0	0
AT5G46880.1	0	0	0	0	0	0	0	0	0	0	0	0	0	0	0	0	0	0	0	0	0	1667300	0	0
AT1G65220.1	1701400	0	0	0	0	0	0	0	0	0	0	0	0	0	0	0	0	0	0	0	0	0	0	0
AT1G49760.2;AT1G49760.1	0	0	0	0	0	0	0	0	0	0	0	0	0	0	0	0	0	0	0	0	0	0	1762400	0
AT4G18060.1	0	0	0	0	0	0	0	0	0	0	0	0	1879300	0	0	0	0	0	0	0	0	0	0	0
AT5G13980.3;AT5G13980.2;AT5G13980.1	0	0	0	0	0	0	0	0	0	0	0	0	1902200	0	0	0	0	0	0	0	0	0	0	0
AT1G02560.1	2006100	0	0	0	0	0	0	0	0	0	0	0	0	0	0	0	0	0	0	0	0	0	0	0
AT4G26870.1;AT4G31180.2;AT4G31180.1	0	0	0	0	0	0	0	0	0	0	0	0	2117300	0	0	0	0	0	0	0	0	0	0	0
AT2G28190.1	2313100	0	0	0	0	0	0	0	0	0	0	0	0	0	0	0	0	0	0	0	0	0	0	0
AT1G49670.1;AT1G49670.2	0	0	0	0	0	0	0	0	0	0	0	0	0	0	0	0	0	0	0	0	0	0	0	2372500
AT1G07080.1	0	0	0	0	0	0	0	0	0	0	0	0	0	0	0	0	0	0	0	0	2405700	0	0	0
AT3G07420.1	0	0	0	0	0	0	0	0	0	0	0	0	2639900	0	0	0	0	0	0	0	0	0	0	0
AT1G64740.1	0	0	0	0	0	0	0	0	0	0	0	0	0	0	0	0	0	0	2695800	0	0	0	0	0
AT3G44990.1	0	0	0	0	0	0	0	0	0	0	0	0	0	0	0	0	0	0	0	2709400	0	0	0	0
AT4G28250.2;AT4G28250.1	0	2769500	0	0	0	0	0	0	0	0	0	0	0	0	0	0	0	0	0	0	0	0	0	0
AT4G35800.1	2914100	0	0	0	0	0	0	0	0	0	0	0	0	0	0	0	0	0	0	0	0	0	0	0
AT1G52780.1	0	0	0	0	0	0	0	0	0	0	0	0	0	0	0	0	0	0	0	3163700	0	0	0	0
AT3G18760.2;AT3G18760.1	0	3177900	0	0	0	0	0	0	0	0	0	0	0	0	0	0	0	0	0	0	0	0	0	0
AT5G03540.2;AT5G03540.1;AT5G03540.3	3286800	0	0	0	0	0	0	0	0	0	0	0	0	0	0	0	0	0	0	0	0	0	0	0
AT5G25780.1	0	0	0	0	0	0	0	0	0	0	0	0	0	0	3378700	0	0	0	0	0	0	0	0	0
AT3G43800.1	0	3399600	0	0	0	0	0	0	0	0	0	0	0	0	0	0	0	0	0	0	0	0	0	0
AT5G62630.1	3414600	0	0	0	0	0	0	0	0	0	0	0	0	0	0	0	0	0	0	0	0	0	0	0
AT1G75780.1	0	0	0	0	0	0	0	0	0	0	0	0	0	0	0	0	0	0	0	3436800	0	0	0	0
AT4G13290.1	3493600	0	0	0	0	0	0	0	0	0	0	0	0	0	0	0	0	0	0	0	0	0	0	0
AT3G17900.1	0	3502200	0	0	0	0	0	0	0	0	0	0	0	0	0	0	0	0	0	0	0	0	0	0
AT1G12900.4;AT1G12900.3;AT1G12900.1;AT1G12900.2	0	0	0	0	0	0	0	0	0	0	0	0	3515100	0	0	0	0	0	0	0	0	0	0	0
AT5G63840.1	3587300	0	0	0	0	0	0	0	0	0	0	0	0	0	0	0	0	0	0	0	0	0	0	0
AT5G01330.1	0	0	0	0	0	0	0	0	3598700	0	0	0	0	0	0	0	0	0	0	0	0	0	0	0
AT5G25265.1	0	0	3620100	0	0	0	0	0	0	0	0	0	0	0	0	0	0	0	0	0	0	0	0	0
AT5G43330.1	0	0	0	0	0	0	0	0	0	0	0	0	3652400	0	0	0	0	0	0	0	0	0	0	0
AT5G65360.1;AT5G10980.1;AT5G10400.1;AT5G10390.1;AT4G40040.2;AT4G40040.1;AT4G40030.3;AT4G40030.1;AT3G27360.1;AT1G13370.1;AT1G09200.1;AT5G65350.1;AT4G40030.2	3677000	0	0	0	0	0	0	0	0	0	0	0	0	0	0	0	0	0	0	0	0	0	0	0
AT2G28520.1	3792000	0	0	0	0	0	0	0	0	0	0	0	0	0	0	0	0	0	0	0	0	0	0	0
AT4G35100.2;AT4G35100.1	0	0	0	0	0	0	0	0	0	0	0	0	0	0	3795800	0	0	0	0	0	0	0	0	0
AT3G46000.1	0	0	3818600	0	0	0	0	0	0	0	0	0	0	0	0	0	0	0	0	0	0	0	0	0
AT4G02350.1	0	0	0	0	0	0	0	0	0	0	0	0	0	0	3834100	0	0	0	0	0	0	0	0	0
AT4G19710.2;AT4G19710.1	3889300	0	0	0	0	0	0	0	0	0	0	0	0	0	0	0	0	0	0	0	0	0	0	0
ATCG00280.1	3939900	0	0	0	0	0	0	0	0	0	0	0	0	0	0	0	0	0	0	0	0	0	0	0
AT4G30810.1	0	0	0	0	0	0	0	0	0	0	0	0	0	3969900	0	0	0	0	0	0	0	0	0	0
AT3G07160.1	0	0	0	0	0	0	0	0	0	0	0	0	0	0	0	0	0	0	0	3991000	0	0	0	0
AT1G12470.1	4075700	0	0	0	0	0	0	0	0	0	0	0	0	0	0	0	0	0	0	0	0	0	0	0
AT5G20280.1;AT5G11110.1	0	0	0	0	0	0	0	0	0	0	0	0	0	0	0	0	0	0	4127800	0	0	0	0	0
AT1G80680.1	0	0	0	0	0	0	4184200	0	0	0	0	0	0	0	0	0	0	0	0	0	0	0	0	0
AT2G46930.1	4256300	0	0	0	0	0	0	0	0	0	0	0	0	0	0	0	0	0	0	0	0	0	0	0
AT1G77520.1	4334900	0	0	0	0	0	0	0	0	0	0	0	0	0	0	0	0	0	0	0	0	0	0	0
AT3G04600.3;AT3G04600.2;AT3G04600.1	0	0	0	0	0	0	0	0	0	0	0	0	0	0	0	0	0	0	4357100	0	0	0	0	0
AT5G63190.2;AT5G63190.1	0	0	0	0	0	0	0	0	0	0	0	0	4378500	0	0	0	0	0	0	0	0	0	0	0
AT3G11780.1;AT3G11780.2	0	4379100	0	0	0	0	0	0	0	0	0	0	0	0	0	0	0	0	0	0	0	0	0	0
AT1G08250.1;AT3G44720.1;AT2G27820.1;AT5G22630.1	4569700	0	0	0	0	0	0	0	0	0	0	0	0	0	0	0	0	0	0	0	0	0	0	0
AT4G34230.2;AT4G34230.1	4753800	0	0	0	0	0	0	0	0	0	0	0	0	0	0	0	0	0	0	0	0	0	0	0
AT3G44330.1	0	0	4776900	0	0	0	0	0	0	0	0	0	0	0	0	0	0	0	0	0	0	0	0	0
AT5G58270.1	0	0	0	0	0	0	0	0	0	0	0	0	4809100	0	0	0	0	0	0	0	0	0	0	0
AT1G54090.1;AT3G14090.1	0	0	0	0	0	0	0	0	0	0	0	0	4829200	0	0	0	0	0	0	0	0	0	0	0
AT4G38600.1;AT4G38600.2	4906200	0	0	0	0	0	0	0	0	0	0	0	0	0	0	0	0	0	0	0	0	0	0	0
AT3G27300.3;AT3G27300.2;AT3G27300.1	4942100	0	0	0	0	0	0	0	0	0	0	0	0	0	0	0	0	0	0	0	0	0	0	0
AT5G24350.1;AT5G24350.2	0	0	0	0	0	0	0	0	0	0	0	0	4979400	0	0	0	0	0	0	0	0	0	0	0
AT3G19340.1	0	0	0	0	0	0	0	0	0	0	0	0	4979900	0	0	0	0	0	0	0	0	0	0	0
AT3G12800.1	0	0	0	0	0	0	0	0	0	0	0	0	4996300	0	0	0	0	0	0	0	0	0	0	0
AT2G21045.1	0	0	0	0	0	0	0	0	0	0	0	0	0	0	5185500	0	0	0	0	0	0	0	0	0
AT3G15020.2;AT3G15020.1	0	0	0	0	0	0	0	0	0	0	0	0	0	0	0	0	0	0	0	0	0	0	0	5202700
AT1G56120.1;AT1G56145.1;AT1G56130.1;AT1G56140.1;AT1G56145.2	5203100	0	0	0	0	0	0	0	0	0	0	0	0	0	0	0	0	0	0	0	0	0	0	0
AT3G09220.1	0	0	0	0	0	0	0	0	0	0	0	0	5207300	0	0	0	0	0	0	0	0	0	0	0
AT2G18730.1	0	5220000	0	0	0	0	0	0	0	0	0	0	0	0	0	0	0	0	0	0	0	0	0	0
AT3G02520.1	5260400	0	0	0	0	0	0	0	0	0	0	0	0	0	0	0	0	0	0	0	0	0	0	0
AT4G01660.1	0	0	0	0	0	0	0	0	0	0	0	0	5272400	0	0	0	0	0	0	0	0	0	0	0
AT5G65780.1	5289000	0	0	0	0	0	0	0	0	0	0	0	0	0	0	0	0	0	0	0	0	0	0	0
AT2G25260.1	5425700	0	0	0	0	0	0	0	0	0	0	0	0	0	0	0	0	0	0	0	0	0	0	0
AT5G53300.4;AT5G53300.2;AT5G53300.1;AT5G41700.5;AT5G41700.2;AT5G41700.1;AT4G27960.1;AT3G08690.2;AT3G08690.1;AT1G64230.2;AT1G64230.1;AT5G41700.4;AT1G64230.3;AT4G27960.2;AT1G64230.5;AT1G64230.4	0	0	0	0	0	0	0	0	0	0	0	0	0	0	0	0	0	0	0	5471400	0	0	0	0
AT3G26460.1	0	0	0	0	0	0	0	0	0	0	0	0	0	0	0	0	0	0	0	5533900	0	0	0	0
AT3G02880.1	0	0	0	0	0	0	0	0	0	0	0	0	0	0	0	0	0	0	5569500	0	0	0	0	0
AT1G57860.1;AT1G57660.1	0	0	0	0	0	0	0	0	0	0	0	0	0	0	0	0	0	0	0	0	0	0	5601600	0
AT5G65110.2;AT5G65110.1	5652700	0	0	0	0	0	0	0	0	0	0	0	0	0	0	0	0	0	0	0	0	0	0	0
AT1G61250.2;AT1G61250.1	0	0	0	0	0	0	0	0	0	0	0	0	0	0	0	0	0	0	5709100	0	0	0	0	0
AT3G52150.2;AT3G52150.1	0	0	0	0	0	0	0	5736000	0	0	0	0	0	0	0	0	0	0	0	0	0	0	0	0
AT3G24300.1	0	0	0	0	0	0	0	0	0	0	0	0	0	0	0	0	0	0	0	5738500	0	0	0	0
AT3G12390.1;AT5G13850.1	0	0	0	0	0	5774700	0	0	0	0	0	0	0	0	0	0	0	0	0	0	0	0	0	0
AT3G17210.1	0	0	0	0	0	0	0	0	0	0	0	0	0	0	0	0	0	0	0	5780800	0	0	0	0
AT3G02420.1	5828600	0	0	0	0	0	0	0	0	0	0	0	0	0	0	0	0	0	0	0	0	0	0	0
AT1G76010.1	0	0	0	0	0	0	0	0	0	0	0	0	0	0	5856100	0	0	0	0	0	0	0	0	0
AT4G33010.1;AT4G33010.2	0	0	0	0	0	0	0	0	0	0	0	0	0	0	0	0	5886500	0	0	0	0	0	0	0
AT3G27380.2;AT3G27380.1;AT5G40650.1	5981100	0	0	0	0	0	0	0	0	0	0	0	0	0	0	0	0	0	0	0	0	0	0	0
AT2G38700.1	0	0	0	0	0	0	0	0	0	0	0	0	6010000	0	0	0	0	0	0	0	0	0	0	0
AT3G46560.1	0	0	0	0	0	0	0	0	0	0	0	0	0	0	0	0	0	0	0	0	0	6084800	0	0
AT2G36580.1	0	0	0	0	0	0	0	0	0	0	0	0	0	0	0	0	0	0	0	6169900	0	0	0	0
AT4G32400.1	6182000	0	0	0	0	0	0	0	0	0	0	0	0	0	0	0	0	0	0	0	0	0	0	0
AT1G30360.1	0	0	0	0	0	0	0	0	0	0	0	0	6200400	0	0	0	0	0	0	0	0	0	0	0
AT1G06410.1	0	0	0	0	0	0	0	0	0	0	0	0	6202000	0	0	0	0	0	0	0	0	0	0	0
AT3G16440.1;AT3G21380.1	0	0	0	0	0	0	0	0	0	0	0	0	0	0	0	0	0	0	0	6233000	0	0	0	0
AT5G66920.1	0	0	6248700	0	0	0	0	0	0	0	0	0	0	0	0	0	0	0	0	0	0	0	0	0
AT5G28900.1;AT5G28850.2	0	0	6338400	0	0	0	0	0	0	0	0	0	0	0	0	0	0	0	0	0	0	0	0	0
AT5G13930.1	6355100	0	0	0	0	0	0	0	0	0	0	0	0	0	0	0	0	0	0	0	0	0	0	0
AT5G18170.1	0	0	0	0	0	6474700	0	0	0	0	0	0	0	0	0	0	0	0	0	0	0	0	0	0
AT5G05170.1;AT1G32180.1	0	0	0	0	0	0	6537100	0	0	0	0	0	0	0	0	0	0	0	0	0	0	0	0	0
AT3G28940.1	6551900	0	0	0	0	0	0	0	0	0	0	0	0	0	0	0	0	0	0	0	0	0	0	0
AT4G38350.1;AT4G38350.2	6569700	0	0	0	0	0	0	0	0	0	0	0	0	0	0	0	0	0	0	0	0	0	0	0
AT1G12640.1;AT1G63050.1	6608200	0	0	0	0	0	0	0	0	0	0	0	0	0	0	0	0	0	0	0	0	0	0	0
AT4G39820.1	6667400	0	0	0	0	0	0	0	0	0	0	0	0	0	0	0	0	0	0	0	0	0	0	0
AT1G76550.1	6671200	0	0	0	0	0	0	0	0	0	0	0	0	0	0	0	0	0	0	0	0	0	0	0
AT4G37410.1	6703100	0	0	0	0	0	0	0	0	0	0	0	0	0	0	0	0	0	0	0	0	0	0	0
AT5G04740.1;AT5G04740.2	6717600	0	0	0	0	0	0	0	0	0	0	0	0	0	0	0	0	0	0	0	0	0	0	0
AT2G27860.1;AT1G08200.1	0	0	0	0	0	0	0	0	0	0	0	0	6725800	0	0	0	0	0	0	0	0	0	0	0
AT1G29880.1;AT3G44740.1	0	0	0	0	0	0	0	0	0	0	0	0	0	0	0	0	0	0	0	0	0	0	0	6728500
AT3G17310.2;AT3G17310.1	0	0	0	6737800	0	0	0	0	0	0	0	0	0	0	0	0	0	0	0	0	0	0	0	0
AT1G17880.1	0	0	0	0	0	0	0	0	0	0	0	0	0	0	0	0	0	0	0	0	6755800	0	0	0
AT5G62200.1	6771800	0	0	0	0	0	0	0	0	0	0	0	0	0	0	0	0	0	0	0	0	0	0	0
AT1G20340.1	0	0	0	0	0	0	0	0	0	0	0	0	0	6772400	0	0	0	0	0	0	0	0	0	0
AT1G14610.1	0	0	0	0	6777800	0	0	0	0	0	0	0	0	0	0	0	0	0	0	0	0	0	0	0
AT4G15530.3;AT4G15530.2;AT4G15530.4;AT4G15530.1;AT4G15530.6;AT4G15530.5	0	0	0	0	0	0	0	0	0	0	0	0	0	0	0	0	0	0	0	6796500	0	0	0	0
AT3G48730.1;AT5G63570.1	0	0	0	0	0	0	6831800	0	0	0	0	0	0	0	0	0	0	0	0	0	0	0	0	0
AT1G06000.1	0	0	0	0	0	0	0	0	0	0	0	0	6873600	0	0	0	0	0	0	0	0	0	0	0
AT5G54440.1	0	0	0	0	0	0	0	0	0	0	0	0	6902200	0	0	0	0	0	0	0	0	0	0	0
AT2G41790.1	0	0	0	0	0	0	0	0	0	0	0	0	6928700	0	0	0	0	0	0	0	0	0	0	0
AT4G15770.1	0	0	0	0	0	0	0	0	0	0	0	0	0	0	0	0	0	0	0	0	0	0	6951000	0
AT5G15400.1	0	0	0	0	0	0	0	0	0	0	0	0	6962900	0	0	0	0	0	0	0	0	0	0	0
AT4G02570.4;AT4G02570.3;AT4G02570.2;AT4G02570.1	0	0	0	0	0	0	0	0	0	0	0	0	7011300	0	0	0	0	0	0	0	0	0	0	0
AT1G07660.2;AT5G59970.1;AT5G59690.1;AT3G53730.1;AT3G46320.1;AT3G45930.1;AT2G28740.1;AT1G07820.2;AT1G07820.1;AT1G07660.1	0	0	0	0	0	0	0	0	0	0	0	0	0	0	0	0	0	0	0	7017100	0	0	0	0
AT2G29490.1	7017300	0	0	0	0	0	0	0	0	0	0	0	0	0	0	0	0	0	0	0	0	0	0	0
AT3G57610.1	7026900	0	0	0	0	0	0	0	0	0	0	0	0	0	0	0	0	0	0	0	0	0	0	0
AT4G13780.1	0	0	0	0	0	0	0	0	0	0	0	0	0	0	7047200	0	0	0	0	0	0	0	0	0
AT2G43100.1;AT2G43090.1	7225600	0	0	0	0	0	0	0	0	0	0	0	0	0	0	0	0	0	0	0	0	0	0	0
AT5G52370.1;AT5G58990.1	0	7235100	0	0	0	0	0	0	0	0	0	0	0	0	0	0	0	0	0	0	0	0	0	0
AT1G48030.2;AT1G48030.1	0	0	0	0	0	0	0	0	0	0	0	0	7366000	0	0	0	0	0	0	0	0	0	0	0
AT5G10920.1	7400200	0	0	0	0	0	0	0	0	0	0	0	0	0	0	0	0	0	0	0	0	0	0	0
AT1G74470.1	0	7417800	0	0	0	0	0	0	0	0	0	0	0	0	0	0	0	0	0	0	0	0	0	0
AT5G27740.1	7420900	0	0	0	0	0	0	0	0	0	0	0	0	0	0	0	0	0	0	0	0	0	0	0
ATCG00680.1	7432300	0	0	0	0	0	0	0	0	0	0	0	0	0	0	0	0	0	0	0	0	0	0	0
AT2G37170.1	0	0	0	0	0	0	0	0	0	0	0	0	7455100	0	0	0	0	0	0	0	0	0	0	0
AT1G67930.1	0	0	0	0	0	0	0	0	0	0	0	0	7469000	0	0	0	0	0	0	0	0	0	0	0
AT1G74230.1	0	0	7485200	0	0	0	0	0	0	0	0	0	0	0	0	0	0	0	0	0	0	0	0	0
AT1G76160.1;AT1G21860.1;AT1G21850.1	7522100	0	0	0	0	0	0	0	0	0	0	0	0	0	0	0	0	0	0	0	0	0	0	0
AT4G27080.2;AT4G27080.1	7524600	0	0	0	0	0	0	0	0	0	0	0	0	0	0	0	0	0	0	0	0	0	0	0
AT2G19480.3;AT2G19480.2;AT2G19480.1	7537800	0	0	0	0	0	0	0	0	0	0	0	0	0	0	0	0	0	0	0	0	0	0	0
AT5G12290.1	7577800	0	0	0	0	0	0	0	0	0	0	0	0	0	0	0	0	0	0	0	0	0	0	0
AT4G12420.2;AT4G12420.1	7643500	0	0	0	0	0	0	0	0	0	0	0	0	0	0	0	0	0	0	0	0	0	0	0
AT4G18360.2;AT4G18360.1;AT3G14420.4;AT3G14420.5;AT3G14420.6;AT3G14420.3;AT3G14420.2;AT3G14420.1;AT3G14415.3;AT3G14415.1;AT3G14415.2	0	0	0	0	0	0	0	0	7731300	0	0	0	0	0	0	0	0	0	0	0	0	0	0	0
AT3G17810.1	0	0	0	0	0	7765100	0	0	0	0	0	0	0	0	0	0	0	0	0	0	0	0	0	0
AT3G19710.1	0	0	0	0	0	0	0	0	0	0	0	0	7767800	0	0	0	0	0	0	0	0	0	0	0
AT5G35950.1	0	0	0	0	0	0	0	0	0	0	0	0	0	0	0	0	0	0	0	7768600	0	0	0	0
ATCG00800.1	0	0	0	0	0	0	0	0	0	0	0	0	0	0	0	0	0	0	0	0	7817600	0	0	0
AT1G67680.1	0	0	0	0	0	0	0	0	0	0	0	0	0	0	0	0	0	0	7823700	0	0	0	0	0
AT5G47770.1	0	0	0	0	0	0	0	0	0	0	0	0	7844900	0	0	0	0	0	0	0	0	0	0	0
AT1G01910.5;AT1G01910.3;AT1G01910.4;AT1G01910.2;AT1G01910.1	0	0	0	0	0	0	0	0	0	0	0	0	7856000	0	0	0	0	0	0	0	0	0	0	0
AT1G02690.1;AT1G02690.2	7863200	0	0	0	0	0	0	0	0	0	0	0	0	0	0	0	0	0	0	0	0	0	0	0
AT2G01690.1;AT2G01690.2	7937400	0	0	0	0	0	0	0	0	0	0	0	0	0	0	0	0	0	0	0	0	0	0	0
AT3G05970.1	0	0	0	0	0	0	0	0	0	0	0	0	7938900	0	0	0	0	0	0	0	0	0	0	0
AT3G12370.1	0	0	0	0	0	0	0	0	0	0	0	0	0	0	0	0	8027900	0	0	0	0	0	0	0
AT4G37070.4;AT4G37070.3;AT4G37070.1;AT4G37070.2	0	0	0	0	0	0	0	0	0	0	0	0	0	0	0	0	0	0	0	8077900	0	0	0	0
AT5G13280.1	8082500	0	0	0	0	0	0	0	0	0	0	0	0	0	0	0	0	0	0	0	0	0	0	0
AT2G44100.2;AT2G44100.1	8142100	0	0	0	0	0	0	0	0	0	0	0	0	0	0	0	0	0	0	0	0	0	0	0
AT5G56710.1;AT5G56710.2	0	0	0	0	0	0	0	0	0	0	0	0	0	0	0	0	0	0	0	0	0	0	0	8230500
AT4G35060.1	0	0	0	0	0	0	0	0	0	0	0	0	0	0	0	0	0	0	8273600	0	0	0	0	0
AT3G05230.1	8273900	0	0	0	0	0	0	0	0	0	0	0	0	0	0	0	0	0	0	0	0	0	0	0
AT5G37830.1	0	0	0	0	0	0	0	0	0	0	0	0	8316000	0	0	0	0	0	0	0	0	0	0	0
AT5G12860.2;AT5G12860.1	8316100	0	0	0	0	0	0	0	0	0	0	0	0	0	0	0	0	0	0	0	0	0	0	0
AT2G47800.1;AT3G62700.1	0	0	8331600	0	0	0	0	0	0	0	0	0	0	0	0	0	0	0	0	0	0	0	0	0
AT3G22890.1;AT4G14680.1;AT1G19920.1	8340000	0	0	0	0	0	0	0	0	0	0	0	0	0	0	0	0	0	0	0	0	0	0	0
AT5G23140.1	8365900	0	0	0	0	0	0	0	0	0	0	0	0	0	0	0	0	0	0	0	0	0	0	0
AT4G35000.1	0	0	0	0	0	0	0	0	0	0	0	0	8398300	0	0	0	0	0	0	0	0	0	0	0
AT5G66040.1	8422400	0	0	0	0	0	0	0	0	0	0	0	0	0	0	0	0	0	0	0	0	0	0	0
AT1G23310.2;AT1G70580.4;AT1G70580.3;AT1G70580.2;AT1G70580.1;AT1G23310.1	8445100	0	0	0	0	0	0	0	0	0	0	0	0	0	0	0	0	0	0	0	0	0	0	0
ATCG01130.1	0	0	0	0	0	0	0	0	0	0	0	0	8512400	0	0	0	0	0	0	0	0	0	0	0
AT5G39480.1	0	0	0	0	0	8529200	0	0	0	0	0	0	0	0	0	0	0	0	0	0	0	0	0	0
AT4G01400.2;AT4G01400.1	0	0	0	0	0	0	0	0	0	0	0	0	0	8539200	0	0	0	0	0	0	0	0	0	0
AT1G71270.1	0	0	0	0	0	0	0	0	0	0	0	0	0	0	8579600	0	0	0	0	0	0	0	0	0
AT1G04280.1	0	8654200	0	0	0	0	0	0	0	0	0	0	0	0	0	0	0	0	0	0	0	0	0	0
AT1G02140.1	8692800	0	0	0	0	0	0	0	0	0	0	0	0	0	0	0	0	0	0	0	0	0	0	0
AT1G34130.1	0	0	0	0	0	0	0	0	0	0	0	0	8715100	0	0	0	0	0	0	0	0	0	0	0
AT5G09440.1;AT5G64260.1	0	8729400	0	0	0	0	0	0	0	0	0	0	0	0	0	0	0	0	0	0	0	0	0	0
AT4G36220.1	0	0	0	0	0	0	0	0	0	0	0	0	0	0	8765900	0	0	0	0	0	0	0	0	0
AT1G79230.3;AT1G79230.1;AT1G79230.2	8776800	0	0	0	0	0	0	0	0	0	0	0	0	0	0	0	0	0	0	0	0	0	0	0
AT3G02190.1	0	0	0	0	8790000	0	0	0	0	0	0	0	0	0	0	0	0	0	0	0	0	0	0	0
AT2G39810.1	8821300	0	0	0	0	0	0	0	0	0	0	0	0	0	0	0	0	0	0	0	0	0	0	0
AT5G40480.1	0	0	0	0	0	0	0	0	0	0	0	0	8864900	0	0	0	0	0	0	0	0	0	0	0
AT1G07040.1	0	0	0	0	0	8897100	0	0	0	0	0	0	0	0	0	0	0	0	0	0	0	0	0	0
AT2G37990.1	0	0	0	0	8984800	0	0	0	0	0	0	0	0	0	0	0	0	0	0	0	0	0	0	0
AT4G33250.1	9011700	0	0	0	0	0	0	0	0	0	0	0	0	0	0	0	0	0	0	0	0	0	0	0
AT5G05370.1;AT3G10860.1	0	0	9075900	0	0	0	0	0	0	0	0	0	0	0	0	0	0	0	0	0	0	0	0	0
AT1G51830.1;AT1G51620.1;AT1G51620.2;AT1G51810.1;AT2G28970.1;AT1G51890.2;AT1G51870.1;AT2G04300.1;AT5G59660.1;AT1G05700.1;AT1G51805.2;AT5G16900.1;AT5G59670.1;AT2G14510.1;AT1G07560.1;AT2G29000.1;AT1G51910.1;AT1G51890.1;AT2G28960.1;AT1G51880.1;AT2G28990.1;AT1G51805.1;AT1G51820.1;AT2G14440.1;AT5G59680.1;AT1G49100.1;AT1G51860.1;AT5G59650.1;AT1G51800.1;AT3G21340.1	0	0	0	0	0	0	0	0	0	0	0	0	0	0	0	0	0	0	9093000	0	0	0	0	0
AT1G48920.1	0	0	0	0	9099000	0	0	0	0	0	0	0	0	0	0	0	0	0	0	0	0	0	0	0
AT1G07370.1;AT2G29570.1	9125000	0	0	0	0	0	0	0	0	0	0	0	0	0	0	0	0	0	0	0	0	0	0	0
AT5G47910.1	0	0	0	0	0	0	0	0	0	0	0	0	0	0	9125100	0	0	0	0	0	0	0	0	0
AT2G34660.2;AT2G34660.1	0	0	0	0	0	0	0	0	0	0	0	0	9126600	0	0	0	0	0	0	0	0	0	0	0
AT2G31490.1	0	0	0	0	0	0	0	0	0	0	0	0	9215500	0	0	0	0	0	0	0	0	0	0	0
AT1G62820.1	0	0	0	0	0	0	0	0	0	0	0	0	9218100	0	0	0	0	0	0	0	0	0	0	0
AT3G51050.1	0	0	0	0	0	0	0	0	0	0	0	0	0	0	0	0	0	0	0	9242300	0	0	0	0
AT1G22440.1	9268800	0	0	0	0	0	0	0	0	0	0	0	0	0	0	0	0	0	0	0	0	0	0	0
AT1G60680.1;AT1G60730.2;AT1G60750.1;AT1G60730.1;AT1G60730.3	0	0	0	0	0	0	0	0	9300300	0	0	0	0	0	0	0	0	0	0	0	0	0	0	0
AT5G22650.2;AT5G22650.1	0	0	0	0	0	0	0	0	0	0	0	0	9330600	0	0	0	0	0	0	0	0	0	0	0
AT1G20580.1;AT1G76300.1;AT1G20600.1	0	0	9343800	0	0	0	0	0	0	0	0	0	0	0	0	0	0	0	0	0	0	0	0	0
AT1G62130.1;AT4G24860.1;AT1G02890.2;AT1G02890.1;AT4G02480.1	0	0	0	0	0	0	0	0	0	0	0	0	0	9348200	0	0	0	0	0	0	0	0	0	0
AT1G02730.1	0	9351200	0	0	0	0	0	0	0	0	0	0	0	0	0	0	0	0	0	0	0	0	0	0
AT5G58490.1	0	0	0	0	0	0	0	0	0	0	0	0	9352500	0	0	0	0	0	0	0	0	0	0	0
AT2G41620.1	9358500	0	0	0	0	0	0	0	0	0	0	0	0	0	0	0	0	0	0	0	0	0	0	0
AT5G23840.2;AT5G23830.2;AT5G23830.1;AT5G23840.1	0	0	0	0	0	0	0	0	0	0	0	0	0	0	0	0	0	0	0	9389100	0	0	0	0
AT5G11560.1	0	9404600	0	0	0	0	0	0	0	0	0	0	0	0	0	0	0	0	0	0	0	0	0	0
AT1G61870.1	0	0	0	0	0	0	0	0	0	0	0	0	0	0	0	0	0	0	0	0	0	0	0	9432800
AT5G50460.1;AT4G24920.1	0	0	0	0	0	0	0	0	0	0	0	0	0	9444100	0	0	0	0	0	0	0	0	0	0
AT1G54080.1;AT1G54080.2	0	0	0	0	0	0	0	0	0	0	0	0	9477300	0	0	0	0	0	0	0	0	0	0	0
AT1G70830.4;AT1G70830.1;AT1G70830.5;AT1G70830.3;AT1G70830.2	0	0	9506000	0	0	0	0	0	0	0	0	0	0	0	0	0	0	0	0	0	0	0	0	0
AT1G12920.1	9529200	0	0	0	0	0	0	0	0	0	0	0	0	0	0	0	0	0	0	0	0	0	0	0
AT2G19570.1	9529500	0	0	0	0	0	0	0	0	0	0	0	0	0	0	0	0	0	0	0	0	0	0	0
AT5G16300.3;AT5G16300.2;AT5G16300.4;AT5G16300.1	0	0	0	0	0	0	0	0	0	0	0	0	0	0	0	0	0	0	0	9572100	0	0	0	0
AT3G06690.1;AT1G06290.1	0	0	0	0	0	0	0	0	0	0	0	0	9596500	0	0	0	0	0	0	0	0	0	0	0
AT2G02480.1	0	9601400	0	0	0	0	0	0	0	0	0	0	0	0	0	0	0	0	0	0	0	0	0	0
AT1G05350.1	9619800	0	0	0	0	0	0	0	0	0	0	0	0	0	0	0	0	0	0	0	0	0	0	0
AT5G13710.2;AT5G13710.1	9655500	0	0	0	0	0	0	0	0	0	0	0	0	0	0	0	0	0	0	0	0	0	0	0
AT5G25940.1	9712800	0	0	0	0	0	0	0	0	0	0	0	0	0	0	0	0	0	0	0	0	0	0	0
AT5G52240.2;AT5G52240.1;AT3G48890.1	9715600	0	0	0	0	0	0	0	0	0	0	0	0	0	0	0	0	0	0	0	0	0	0	0
AT3G49100.1	0	9717600	0	0	0	0	0	0	0	0	0	0	0	0	0	0	0	0	0	0	0	0	0	0
AT5G23860.2;AT5G23860.1	0	0	9801900	0	0	0	0	0	0	0	0	0	0	0	0	0	0	0	0	0	0	0	0	0
AT1G24280.1;AT5G35790.1	9812800	0	0	0	0	0	0	0	0	0	0	0	0	0	0	0	0	0	0	0	0	0	0	0
AT5G12110.1	0	0	0	0	0	0	0	0	0	0	0	0	9826200	0	0	0	0	0	0	0	0	0	0	0
AT3G28720.1	0	0	9865100	0	0	0	0	0	0	0	0	0	0	0	0	0	0	0	0	0	0	0	0	0
AT2G43590.1	9865800	0	0	0	0	0	0	0	0	0	0	0	0	0	0	0	0	0	0	0	0	0	0	0
AT4G37830.1	9879500	0	0	0	0	0	0	0	0	0	0	0	0	0	0	0	0	0	0	0	0	0	0	0
ATMG00160.1	0	0	9912800	0	0	0	0	0	0	0	0	0	0	0	0	0	0	0	0	0	0	0	0	0
AT2G22480.1	9926900	0	0	0	0	0	0	0	0	0	0	0	0	0	0	0	0	0	0	0	0	0	0	0
AT1G75220.1;AT1G19450.1	9935500	0	0	0	0	0	0	0	0	0	0	0	0	0	0	0	0	0	0	0	0	0	0	0
AT5G20920.3;AT5G20920.1;AT5G20920.2	0	0	0	9988500	0	0	0	0	0	0	0	0	0	0	0	0	0	0	0	0	0	0	0	0
AT2G04780.2;AT2G04780.1	0	0	0	0	0	0	0	0	0	0	0	0	0	0	0	0	0	0	0	0	0	0	0	10021000
AT1G11475.1;AT1G61700.1	0	0	0	0	0	0	0	0	0	0	0	0	0	0	0	0	0	0	0	10040000	0	0	0	0
AT1G76810.1	0	0	0	0	0	0	0	0	0	0	0	0	0	10047000	0	0	0	0	0	0	0	0	0	0
AT1G02530.1	0	0	0	0	0	0	0	0	0	0	0	0	0	0	0	0	0	0	0	10082000	0	0	0	0
AT5G39730.1	0	0	0	0	0	0	0	0	0	0	0	0	0	0	0	0	0	0	0	10103000	0	0	0	0
AT4G04040.1	0	0	0	0	0	0	0	0	0	0	0	0	10109000	0	0	0	0	0	0	0	0	0	0	0
AT1G15820.1	10142000	0	0	0	0	0	0	0	0	0	0	0	0	0	0	0	0	0	0	0	0	0	0	0
AT5G67630.1;AT3G49830.1	0	0	0	0	0	0	0	0	10173000	0	0	0	0	0	0	0	0	0	0	0	0	0	0	0
AT2G29540.2;AT2G29540.1	10176000	0	0	0	0	0	0	0	0	0	0	0	0	0	0	0	0	0	0	0	0	0	0	0
AT1G69840.7;AT1G69840.6;AT1G69840.5;AT1G69840.4;AT1G69840.3;AT1G69840.2;AT1G69840.1	0	0	0	0	0	0	0	0	0	0	0	0	10268000	0	0	0	0	0	0	0	0	0	0	0
AT2G21170.1;AT2G21170.2	0	0	10323000	0	0	0	0	0	0	0	0	0	0	0	0	0	0	0	0	0	0	0	0	0
AT4G29120.1	10363000	0	0	0	0	0	0	0	0	0	0	0	0	0	0	0	0	0	0	0	0	0	0	0
AT5G27380.1	0	0	0	0	0	0	0	0	0	0	0	0	0	0	0	0	0	0	0	0	0	0	0	10392000
AT5G10780.1;AT5G10780.2	0	0	0	0	0	0	0	0	0	0	0	0	0	0	0	0	0	0	10430000	0	0	0	0	0
AT5G55610.2;AT5G55610.1	0	10463000	0	0	0	0	0	0	0	0	0	0	0	0	0	0	0	0	0	0	0	0	0	0
AT4G17050.1	0	0	0	0	0	0	0	0	0	0	0	0	0	0	0	0	0	0	10480000	0	0	0	0	0
AT2G23350.1	10530000	0	0	0	0	0	0	0	0	0	0	0	0	0	0	0	0	0	0	0	0	0	0	0
AT1G15810.1	0	0	10538000	0	0	0	0	0	0	0	0	0	0	0	0	0	0	0	0	0	0	0	0	0
AT1G52670.1	0	0	0	0	0	0	0	0	0	0	0	0	10539000	0	0	0	0	0	0	0	0	0	0	0
AT4G22310.1;AT4G05590.1;AT4G14695.1;AT4G05590.2	10572000	0	0	0	0	0	0	0	0	0	0	0	0	0	0	0	0	0	0	0	0	0	0	0
AT5G60640.3;AT5G60640.2;AT5G60640.1	0	0	0	0	0	0	0	0	10591000	0	0	0	0	0	0	0	0	0	0	0	0	0	0	0
AT5G41950.1	0	0	0	0	0	0	0	0	0	0	0	0	10718000	0	0	0	0	0	0	0	0	0	0	0
AT4G34980.1	0	0	0	10743000	0	0	0	0	0	0	0	0	0	0	0	0	0	0	0	0	0	0	0	0
AT3G13610.1	10818000	0	0	0	0	0	0	0	0	0	0	0	0	0	0	0	0	0	0	0	0	0	0	0
AT5G26830.1	10819000	0	0	0	0	0	0	0	0	0	0	0	0	0	0	0	0	0	0	0	0	0	0	0
AT3G14790.1	0	0	10855000	0	0	0	0	0	0	0	0	0	0	0	0	0	0	0	0	0	0	0	0	0
AT4G17520.1	0	0	0	0	10981000	0	0	0	0	0	0	0	0	0	0	0	0	0	0	0	0	0	0	0
CON__P02662;CON_P02662	0	0	11067000	0	0	0	0	0	0	0	0	0	0	0	0	0	0	0	0	0	0	0	0	0
AT1G55210.2;AT1G55210.1	11076000	0	0	0	0	0	0	0	0	0	0	0	0	0	0	0	0	0	0	0	0	0	0	0
AT4G01870.1	0	0	0	0	0	0	0	0	0	0	0	0	0	0	0	0	0	0	0	11086000	0	0	0	0
AT3G12110.1;AT5G59370.2;AT5G59370.1;AT3G46520.1;AT2G42170.1	0	11202000	0	0	0	0	0	0	0	0	0	0	0	0	0	0	0	0	0	0	0	0	0	0
AT3G18060.1	0	0	0	11230000	0	0	0	0	0	0	0	0	0	0	0	0	0	0	0	0	0	0	0	0
AT5G36230.1	0	11294000	0	0	0	0	0	0	0	0	0	0	0	0	0	0	0	0	0	0	0	0	0	0
AT2G36060.3;AT2G36060.1;AT2G36060.2	0	0	0	0	0	0	0	0	0	0	0	0	0	0	0	0	0	0	0	11332000	0	0	0	0
AT1G23800.1	0	0	0	0	0	0	0	0	0	0	0	0	0	0	0	0	0	0	0	11398000	0	0	0	0
AT5G64990.1;AT5G10260.1;AT2G22290.1;AT2G44610.1;AT4G39890.1	0	0	11432000	0	0	0	0	0	0	0	0	0	0	0	0	0	0	0	0	0	0	0	0	0
AT5G15970.1	0	0	0	0	0	0	0	11457000	0	0	0	0	0	0	0	0	0	0	0	0	0	0	0	0
AT5G60790.1	0	0	0	0	0	0	0	0	0	0	0	0	11512000	0	0	0	0	0	0	0	0	0	0	0
AT1G22530.1;AT1G72150.1	0	0	0	0	0	0	0	0	0	0	0	0	11531000	0	0	0	0	0	0	0	0	0	0	0
AT3G57330.1;AT1G27770.2;AT2G22950.1;AT1G27770.1;AT2G41560.1	0	11569000	0	0	0	0	0	0	0	0	0	0	0	0	0	0	0	0	0	0	0	0	0	0
AT1G37130.1	0	0	0	0	0	0	0	0	0	0	0	0	11571000	0	0	0	0	0	0	0	0	0	0	0
AT5G19440.1	0	0	0	0	0	0	0	0	11583000	0	0	0	0	0	0	0	0	0	0	0	0	0	0	0
AT5G50920.1;AT3G48870.2;AT3G48870.1;AT5G51070.1	11611000	0	0	0	0	0	0	0	0	0	0	0	0	0	0	0	0	0	0	0	0	0	0	0
AT2G01540.1	11613000	0	0	0	0	0	0	0	0	0	0	0	0	0	0	0	0	0	0	0	0	0	0	0
AT5G45510.2;AT5G45510.1	0	0	0	0	0	0	0	0	0	0	0	0	11755000	0	0	0	0	0	0	0	0	0	0	0
AT3G13120.2;AT3G13120.1	0	0	0	0	0	0	0	0	11764000	0	0	0	0	0	0	0	0	0	0	0	0	0	0	0
AT1G61520.2;AT1G61520.3;AT1G61520.1	0	0	0	0	0	0	0	0	0	0	0	0	11767000	0	0	0	0	0	0	0	0	0	0	0
AT1G74010.1;AT1G74020.1	11790000	0	0	0	0	0	0	0	0	0	0	0	0	0	0	0	0	0	0	0	0	0	0	0
AT2G41530.1	0	0	0	0	0	0	0	0	11808000	0	0	0	0	0	0	0	0	0	0	0	0	0	0	0
AT3G61240.2;AT3G61240.1;AT2G45810.1	0	0	0	0	0	0	0	0	0	0	0	0	0	0	11810000	0	0	0	0	0	0	0	0	0
AT3G26360.1	0	0	0	0	11816000	0	0	0	0	0	0	0	0	0	0	0	0	0	0	0	0	0	0	0
AT2G16700.2;AT2G16700.1	0	0	0	0	0	0	0	0	0	0	0	0	0	0	0	0	0	0	0	11835000	0	0	0	0
AT5G44140.1	11850000	0	0	0	0	0	0	0	0	0	0	0	0	0	0	0	0	0	0	0	0	0	0	0
AT5G42740.1	0	0	11862000	0	0	0	0	0	0	0	0	0	0	0	0	0	0	0	0	0	0	0	0	0
AT2G01530.1	0	0	0	0	0	0	0	0	0	0	0	0	0	0	0	0	0	0	11911000	0	0	0	0	0
AT1G18450.1;AT1G73910.1	11928000	0	0	0	0	0	0	0	0	0	0	0	0	0	0	0	0	0	0	0	0	0	0	0
AT1G31910.2;AT1G31910.1	11970000	0	0	0	0	0	0	0	0	0	0	0	0	0	0	0	0	0	0	0	0	0	0	0
AT2G05920.1	11993000	0	0	0	0	0	0	0	0	0	0	0	0	0	0	0	0	0	0	0	0	0	0	0
AT5G58410.1	0	0	0	0	0	0	0	0	0	0	0	0	12012000	0	0	0	0	0	0	0	0	0	0	0
AT3G09270.1	0	0	0	0	0	0	0	0	0	0	0	0	12087000	0	0	0	0	0	0	0	0	0	0	0
AT5G45620.1;AT5G45620.2	0	0	0	0	0	0	0	0	0	0	0	0	12201000	0	0	0	0	0	0	0	0	0	0	0
AT2G21330.2;AT4G38970.2;AT2G21330.3;AT4G38970.1;AT2G21330.1	0	0	0	0	0	0	0	12230000	0	0	0	0	0	0	0	0	0	0	0	0	0	0	0	0
AT4G28440.1	0	12252000	0	0	0	0	0	0	0	0	0	0	0	0	0	0	0	0	0	0	0	0	0	0
AT1G44170.3;AT1G44170.2;AT1G44170.1	0	0	0	0	0	0	0	0	0	0	0	0	12266000	0	0	0	0	0	0	0	0	0	0	0
AT5G61580.2;AT5G61580.1	0	0	0	0	0	0	0	0	0	0	0	0	12266000	0	0	0	0	0	0	0	0	0	0	0
ATCG00350.1	0	0	0	0	0	0	0	0	0	0	0	0	0	0	0	0	0	0	0	12423000	0	0	0	0
AT4G11380.1;AT4G11380.2;AT4G23460.1	12425000	0	0	0	0	0	0	0	0	0	0	0	0	0	0	0	0	0	0	0	0	0	0	0
AT1G14980.1	0	0	0	12450000	0	0	0	0	0	0	0	0	0	0	0	0	0	0	0	0	0	0	0	0
AT3G07230.1	0	0	0	0	0	12461000	0	0	0	0	0	0	0	0	0	0	0	0	0	0	0	0	0	0
AT5G40580.2;AT5G40580.1;AT5G40580.3	12496000	0	0	0	0	0	0	0	0	0	0	0	0	0	0	0	0	0	0	0	0	0	0	0
AT4G12590.1	0	0	12529000	0	0	0	0	0	0	0	0	0	0	0	0	0	0	0	0	0	0	0	0	0
AT4G22000.1	0	0	0	12708000	0	0	0	0	0	0	0	0	0	0	0	0	0	0	0	0	0	0	0	0
AT3G15190.1	0	0	0	0	0	0	0	0	0	0	0	0	0	0	0	0	0	0	0	0	0	0	12709000	0
AT4G00860.1	0	0	0	0	0	12723000	0	0	0	0	0	0	0	0	0	0	0	0	0	0	0	0	0	0
AT4G04640.1	12924000	0	0	0	0	0	0	0	0	0	0	0	0	0	0	0	0	0	0	0	0	0	0	0
AT1G02870.1	0	0	0	0	13014000	0	0	0	0	0	0	0	0	0	0	0	0	0	0	0	0	0	0	0
AT5G15610.2;AT5G15610.1	0	0	0	0	0	0	0	0	0	0	0	0	0	0	0	0	0	0	13089000	0	0	0	0	0
AT5G63400.1;AT5G63400.2	0	0	0	0	0	0	0	0	0	0	0	0	0	0	0	0	0	0	0	0	0	0	13162000	0
AT1G79010.1	0	0	13199000	0	0	0	0	0	0	0	0	0	0	0	0	0	0	0	0	0	0	0	0	0
AT2G46860.1	0	0	0	0	0	0	0	0	0	0	0	0	0	0	0	0	0	0	0	0	0	13348000	0	0
AT1G49970.1	0	0	0	0	0	0	0	0	0	0	0	0	13457000	0	0	0	0	0	0	0	0	0	0	0
AT4G09650.1	0	0	0	0	0	0	0	0	0	0	0	0	0	0	0	0	0	0	0	13488000	0	0	0	0
AT2G04030.2;AT2G04030.1	0	0	0	0	0	0	0	0	0	0	0	0	13500000	0	0	0	0	0	0	0	0	0	0	0
AT4G39520.1	0	0	13630000	0	0	0	0	0	0	0	0	0	0	0	0	0	0	0	0	0	0	0	0	0
AT4G20150.1	13688000	0	0	0	0	0	0	0	0	0	0	0	0	0	0	0	0	0	0	0	0	0	0	0
AT3G26300.1;AT3G26290.1	0	0	0	0	0	0	0	0	0	0	0	0	0	0	13706000	0	0	0	0	0	0	0	0	0
AT3G57650.1	13735000	0	0	0	0	0	0	0	0	0	0	0	0	0	0	0	0	0	0	0	0	0	0	0
AT4G14570.1	0	0	0	0	0	0	0	0	0	0	0	0	13761000	0	0	0	0	0	0	0	0	0	0	0
AT1G71950.1	0	0	0	0	0	0	0	0	0	0	0	0	0	13776000	0	0	0	0	0	0	0	0	0	0
AT5G14030.4;AT5G14030.3;AT5G14030.2;AT5G14030.1	13786000	0	0	0	0	0	0	0	0	0	0	0	0	0	0	0	0	0	0	0	0	0	0	0
AT5G47870.1	0	0	0	0	0	0	0	0	0	0	0	0	0	0	13787000	0	0	0	0	0	0	0	0	0
AT4G22570.1	0	0	13834000	0	0	0	0	0	0	0	0	0	0	0	0	0	0	0	0	0	0	0	0	0
AT5G38410.2;AT5G38420.1;AT5G38410.1;AT5G38410.3;AT5G38430.1	13873000	0	0	0	0	0	0	0	0	0	0	0	0	0	0	0	0	0	0	0	0	0	0	0
AT3G29250.2;AT3G29250.1;AT2G47130.1	13904000	0	0	0	0	0	0	0	0	0	0	0	0	0	0	0	0	0	0	0	0	0	0	0
AT4G28320.1	14042000	0	0	0	0	0	0	0	0	0	0	0	0	0	0	0	0	0	0	0	0	0	0	0
AT3G49010.4	0	0	0	0	0	0	0	0	0	0	0	0	0	0	0	14127000	0	0	0	0	0	0	0	0
AT1G47250.1	0	0	14206000	0	0	0	0	0	0	0	0	0	0	0	0	0	0	0	0	0	0	0	0	0
AT2G21060.1	0	0	14210000	0	0	0	0	0	0	0	0	0	0	0	0	0	0	0	0	0	0	0	0	0
AT4G16340.1	0	0	0	0	0	0	0	0	0	0	0	0	14223000	0	0	0	0	0	0	0	0	0	0	0
AT4G08390.4;AT4G08390.3;AT4G08390.2;AT4G08390.1	14259000	0	0	0	0	0	0	0	0	0	0	0	0	0	0	0	0	0	0	0	0	0	0	0
AT5G49210.2;AT5G49210.1	0	0	0	0	0	0	0	0	0	0	0	0	0	0	14304000	0	0	0	0	0	0	0	0	0
AT1G27130.1	0	0	0	0	0	0	0	0	0	0	0	0	14327000	0	0	0	0	0	0	0	0	0	0	0
AT5G61970.1	0	0	14394000	0	0	0	0	0	0	0	0	0	0	0	0	0	0	0	0	0	0	0	0	0
AT1G04630.1	0	14535000	0	0	0	0	0	0	0	0	0	0	0	0	0	0	0	0	0	0	0	0	0	0
AT3G16640.1	0	0	0	0	0	0	0	0	0	0	0	0	14717000	0	0	0	0	0	0	0	0	0	0	0
AT3G23490.1	0	0	0	0	0	0	0	0	0	0	0	0	0	0	0	0	0	0	0	0	0	0	14747000	0
AT1G31817.1	0	0	0	0	0	0	0	0	14752000	0	0	0	0	0	0	0	0	0	0	0	0	0	0	0
AT1G77710.1	0	0	0	0	0	0	0	0	0	0	0	0	0	0	0	14841000	0	0	0	0	0	0	0	0
AT1G51850.1	14844000	0	0	0	0	0	0	0	0	0	0	0	0	0	0	0	0	0	0	0	0	0	0	0
AT3G12900.1	0	0	0	0	0	0	14845000	0	0	0	0	0	0	0	0	0	0	0	0	0	0	0	0	0
AT5G23630.1	14868000	0	0	0	0	0	0	0	0	0	0	0	0	0	0	0	0	0	0	0	0	0	0	0
AT5G26800.1	0	0	14881000	0	0	0	0	0	0	0	0	0	0	0	0	0	0	0	0	0	0	0	0	0
AT1G06950.1	0	0	0	0	0	0	0	0	0	0	0	0	15050000	0	0	0	0	0	0	0	0	0	0	0
AT3G22660.1	0	0	0	0	0	0	0	0	0	0	0	0	0	0	0	0	0	0	0	0	0	0	15179000	0
AT5G25880.1	0	0	0	0	15218000	0	0	0	0	0	0	0	0	0	0	0	0	0	0	0	0	0	0	0
AT3G22300.1	0	0	0	0	0	0	0	0	0	0	0	0	0	0	0	0	0	0	0	0	0	0	15292000	0
AT3G15000.1	0	0	0	0	0	0	0	0	0	0	0	0	0	0	15306000	0	0	0	0	0	0	0	0	0
ATCG00760.1	0	0	15349000	0	0	0	0	0	0	0	0	0	0	0	0	0	0	0	0	0	0	0	0	0
AT3G02760.1	0	0	0	0	0	0	0	0	0	0	0	0	15412000	0	0	0	0	0	0	0	0	0	0	0
AT2G45290.1	0	0	0	0	0	0	0	0	0	0	0	0	15423000	0	0	0	0	0	0	0	0	0	0	0
AT2G18110.1	15479000	0	0	0	0	0	0	0	0	0	0	0	0	0	0	0	0	0	0	0	0	0	0	0
AT1G10670.4;AT1G10670.2;AT1G10670.1	0	0	15505000	0	0	0	0	0	0	0	0	0	0	0	0	0	0	0	0	0	0	0	0	0
AT1G73620.1;AT1G18250.1;AT1G18250.2	0	0	0	0	0	0	0	0	0	0	0	0	0	15548000	0	0	0	0	0	0	0	0	0	0
AT5G07090.2	0	0	0	0	0	0	0	0	0	0	0	0	0	0	0	0	0	0	0	0	0	0	15560000	0
AT2G38750.1	15589000	0	0	0	0	0	0	0	0	0	0	0	0	0	0	0	0	0	0	0	0	0	0	0
AT1G53645.1	0	0	0	0	0	0	0	0	0	0	0	0	0	15605000	0	0	0	0	0	0	0	0	0	0
AT1G51560.1	0	0	15628000	0	0	0	0	0	0	0	0	0	0	0	0	0	0	0	0	0	0	0	0	0
AT1G17170.1	15646000	0	0	0	0	0	0	0	0	0	0	0	0	0	0	0	0	0	0	0	0	0	0	0
AT3G18000.1	0	0	0	0	0	0	0	0	0	0	0	0	15694000	0	0	0	0	0	0	0	0	0	0	0
AT4G29900.1	0	0	0	0	0	0	0	0	0	0	0	0	15752000	0	0	0	0	0	0	0	0	0	0	0
AT2G39800.2;AT2G39800.3;AT2G39800.4;AT2G39800.1;AT3G55610.1;AT3G55610.2	15765000	0	0	0	0	0	0	0	0	0	0	0	0	0	0	0	0	0	0	0	0	0	0	0
AT1G74030.1	0	0	0	0	0	0	0	0	0	0	15863000	0	0	0	0	0	0	0	0	0	0	0	0	0
AT1G20050.1	0	0	15957000	0	0	0	0	0	0	0	0	0	0	0	0	0	0	0	0	0	0	0	0	0
AT1G09270.3;AT1G09270.2;AT1G09270.1	0	0	0	0	0	0	0	0	0	0	0	0	16024000	0	0	0	0	0	0	0	0	0	0	0
AT4G24840.1	0	0	0	0	0	0	0	0	0	0	0	0	16032000	0	0	0	0	0	0	0	0	0	0	0
AT3G03270.2;AT3G03270.1	0	0	0	0	0	0	0	0	0	0	0	0	0	0	0	0	0	0	16069000	0	0	0	0	0
ATCG00160.1	0	0	0	0	0	0	0	0	16072000	0	0	0	0	0	0	0	0	0	0	0	0	0	0	0
AT3G13870.2;AT3G13870.1	16111000	0	0	0	0	0	0	0	0	0	0	0	0	0	0	0	0	0	0	0	0	0	0	0
AT3G27740.1	0	0	0	0	0	0	0	0	0	0	0	0	0	16223000	0	0	0	0	0	0	0	0	0	0
AT3G23300.1;AT4G14360.2;AT4G14360.1;AT1G04430.2;AT1G04430.1	0	0	0	0	0	0	0	0	0	0	0	0	16239000	0	0	0	0	0	0	0	0	0	0	0
AT1G77590.1	16254000	0	0	0	0	0	0	0	0	0	0	0	0	0	0	0	0	0	0	0	0	0	0	0
AT3G57890.1;AT3G57890.2	16254000	0	0	0	0	0	0	0	0	0	0	0	0	0	0	0	0	0	0	0	0	0	0	0
AT1G51630.1	16329000	0	0	0	0	0	0	0	0	0	0	0	0	0	0	0	0	0	0	0	0	0	0	0
CON__P00978	0	0	0	0	0	0	0	0	0	16362000	0	0	0	0	0	0	0	0	0	0	0	0	0	0
AT4G16760.1;AT4G16760.2	0	0	0	0	0	0	0	0	0	0	0	0	0	0	16377000	0	0	0	0	0	0	0	0	0
AT5G45280.1;AT5G45280.2	16418000	0	0	0	0	0	0	0	0	0	0	0	0	0	0	0	0	0	0	0	0	0	0	0
AT4G30920.1	16436000	0	0	0	0	0	0	0	0	0	0	0	0	0	0	0	0	0	0	0	0	0	0	0
AT4G23100.3;AT4G23100.1;AT4G23100.2	0	0	0	0	0	0	0	0	0	0	0	0	0	16609000	0	0	0	0	0	0	0	0	0	0
AT5G56940.1	0	16623000	0	0	0	0	0	0	0	0	0	0	0	0	0	0	0	0	0	0	0	0	0	0
AT5G56680.1	0	0	0	0	0	0	0	0	0	0	0	0	0	0	0	0	0	0	0	0	0	0	0	16665000
AT3G08943.1;AT3G08947.1	16714000	0	0	0	0	0	0	0	0	0	0	0	0	0	0	0	0	0	0	0	0	0	0	0
AT1G79440.1	0	0	0	0	0	0	0	0	0	0	0	0	16804000	0	0	0	0	0	0	0	0	0	0	0
AT5G49810.1	16834000	0	0	0	0	0	0	0	0	0	0	0	0	0	0	0	0	0	0	0	0	0	0	0
AT3G42170.1	0	0	0	0	0	0	0	0	0	0	0	0	16871000	0	0	0	0	0	0	0	0	0	0	0
AT5G37780.1;AT1G66410.1;AT1G66410.2;AT5G37780.2;AT5G37780.3	0	0	0	0	0	0	0	0	0	0	0	0	0	0	0	0	0	0	0	0	0	0	16880000	0
ATMG00080.1	0	0	0	0	0	16967000	0	0	0	0	0	0	0	0	0	0	0	0	0	0	0	0	0	0
AT5G42960.1	0	0	0	0	0	0	0	0	0	0	0	0	17119000	0	0	0	0	0	0	0	0	0	0	0
AT5G39660.2;AT5G39660.1	0	0	17269000	0	0	0	0	0	0	0	0	0	0	0	0	0	0	0	0	0	0	0	0	0
AT5G60530.1	0	0	0	0	0	0	0	0	0	0	0	0	0	0	0	0	0	0	0	0	0	0	17276000	0
AT5G18790.1;AT3G06320.1	0	0	0	17394000	0	0	0	0	0	0	0	0	0	0	0	0	0	0	0	0	0	0	0	0
AT1G24100.1	0	0	0	0	0	0	0	0	0	0	0	0	0	0	17427000	0	0	0	0	0	0	0	0	0
AT4G04830.1;AT4G04830.2;AT4G04810.1;AT4G21830.2;AT4G21840.1;AT4G21830.1	17481000	0	0	0	0	0	0	0	0	0	0	0	0	0	0	0	0	0	0	0	0	0	0	0
AT1G66240.2;AT1G66240.1	0	0	0	0	0	0	0	0	0	0	0	0	0	0	0	0	0	0	17519000	0	0	0	0	0
AT5G45390.1	0	0	0	0	0	0	0	0	0	0	0	0	0	14243000	0	0	0	0	0	3315300	0	0	0	0
AT3G53480.1;AT2G37280.1	0	0	0	0	0	0	17573000	0	0	0	0	0	0	0	0	0	0	0	0	0	0	0	0	0
AT1G74920.1;AT1G74920.2	0	0	0	0	0	0	0	0	0	0	0	0	17625000	0	0	0	0	0	0	0	0	0	0	0
AT5G20090.3;AT5G20090.2;AT5G20090.1	0	0	17785000	0	0	0	0	0	0	0	0	0	0	0	0	0	0	0	0	0	0	0	0	0
AT5G54430.1	0	0	0	0	0	0	0	0	0	0	0	0	17796000	0	0	0	0	0	0	0	0	0	0	0
AT5G51200.1	0	0	0	0	0	0	0	0	0	0	0	0	17843000	0	0	0	0	0	0	0	0	0	0	0
AT2G20140.1	17950000	0	0	0	0	0	0	0	0	0	0	0	0	0	0	0	0	0	0	0	0	0	0	0
AT3G48170.1	18107000	0	0	0	0	0	0	0	0	0	0	0	0	0	0	0	0	0	0	0	0	0	0	0
AT2G30050.1;AT3G01340.2;AT3G01340.1	18146000	0	0	0	0	0	0	0	0	0	0	0	0	0	0	0	0	0	0	0	0	0	0	0
AT5G52820.1	0	0	0	0	0	0	0	0	0	0	0	0	0	0	0	0	0	0	0	0	0	0	18224000	0
AT1G61000.1	0	0	0	0	0	0	0	0	0	0	0	0	0	0	0	0	0	0	18238000	0	0	0	0	0
AT1G29320.1	0	0	0	0	0	0	0	0	0	0	0	0	0	0	0	0	0	0	0	0	0	0	0	18412000
AT2G36380.1	0	0	0	0	0	0	0	0	0	0	0	0	18553000	0	0	0	0	0	0	0	0	0	0	0
AT5G55125.2;AT5G55125.1	0	0	0	18599000	0	0	0	0	0	0	0	0	0	0	0	0	0	0	0	0	0	0	0	0
AT1G23860.3;AT1G23860.4;AT1G23860.2;AT1G23860.1	0	0	0	0	0	0	0	0	0	0	0	0	0	0	0	0	0	0	0	0	0	0	0	18690000
AT3G45010.1	18728000	0	0	0	0	0	0	0	0	0	0	0	0	0	0	0	0	0	0	0	0	0	0	0
AT5G03290.1	0	0	0	0	0	0	18779000	0	0	0	0	0	0	0	0	0	0	0	0	0	0	0	0	0
AT5G39800.1	0	0	0	0	0	0	0	0	19102000	0	0	0	0	0	0	0	0	0	0	0	0	0	0	0
AT1G72750.1	0	0	0	0	0	0	0	0	0	0	0	0	19134000	0	0	0	0	0	0	0	0	0	0	0
AT5G60980.1;AT5G60980.2	0	0	0	0	0	0	0	0	0	0	0	0	0	0	0	0	0	0	0	19174000	0	0	0	0
AT5G20720.3;AT5G20720.2;AT5G20720.1	14375000	0	0	0	0	0	0	0	0	0	0	0	0	0	4995700	0	0	0	0	0	0	0	0	0
AT1G12240.1	0	0	0	0	0	0	0	0	0	0	0	0	19441000	0	0	0	0	0	0	0	0	0	0	0
AT1G03090.1;AT1G03090.2	0	0	0	0	0	0	0	0	0	0	0	0	19478000	0	0	0	0	0	0	0	0	0	0	0
AT2G47710.1	19528000	0	0	0	0	0	0	0	0	0	0	0	0	0	0	0	0	0	0	0	0	0	0	0
AT3G46440.2;AT3G46440.1;AT2G28760.3;AT2G28760.2;AT2G28760.1	19553000	0	0	0	0	0	0	0	0	0	0	0	0	0	0	0	0	0	0	0	0	0	0	0
AT3G12050.2;AT3G12050.1	0	0	0	0	0	0	0	0	0	0	0	0	19589000	0	0	0	0	0	0	0	0	0	0	0
AT5G67400.1;AT3G49960.1	19639000	0	0	0	0	0	0	0	0	0	0	0	0	0	0	0	0	0	0	0	0	0	0	0
AT3G11400.1;AT3G11400.2	0	0	0	0	0	0	0	0	5451400	0	0	0	0	14239000	0	0	0	0	0	0	0	0	0	0
AT2G41220.1;AT5G04140.1;AT5G04140.2	0	0	0	0	0	0	0	0	0	0	0	0	0	0	19714000	0	0	0	0	0	0	0	0	0
AT5G04600.1	0	0	0	0	0	0	0	0	0	0	0	0	0	0	0	0	0	0	0	0	0	0	0	19780000
ATCG00130.1	0	0	0	0	0	0	0	0	0	0	0	0	0	0	0	0	0	0	20097000	0	0	0	0	0
AT3G12260.1	0	0	0	0	0	0	0	0	0	0	0	0	20149000	0	0	0	0	0	0	0	0	0	0	0
ATCG00650.1	0	0	0	0	0	0	0	0	0	0	0	0	0	0	0	0	0	0	0	20246000	0	0	0	0
AT5G40010.1	0	0	0	0	0	0	0	0	20350000	0	0	0	0	0	0	0	0	0	0	0	0	0	0	0
AT3G20320.2;AT3G20320.1	0	0	0	0	0	0	0	0	0	0	0	0	20354000	0	0	0	0	0	0	0	0	0	0	0
AT3G46060.3;AT3G46060.2;AT3G46060.1;AT5G59840.1;AT5G03520.1;AT3G09900.1;AT5G03520.2;AT3G53610.3;AT3G53610.2;AT3G53610.1	20430000	0	0	0	0	0	0	0	0	0	0	0	0	0	0	0	0	0	0	0	0	0	0	0
AT5G66140.1	0	0	0	0	0	0	0	0	0	0	0	0	20533000	0	0	0	0	0	0	0	0	0	0	0
AT3G45300.1	0	0	0	0	0	0	0	0	0	0	0	0	20614000	0	0	0	0	0	0	0	0	0	0	0
AT5G15490.1;AT1G26570.1;AT3G01010.1	0	0	0	0	0	0	0	0	0	0	0	0	20649000	0	0	0	0	0	0	0	0	0	0	0
AT1G27310.1	0	20782000	0	0	0	0	0	0	0	0	0	0	0	0	0	0	0	0	0	0	0	0	0	0
AT1G20450.2;AT1G20450.1	0	0	0	0	0	20803000	0	0	0	0	0	0	0	0	0	0	0	0	0	0	0	0	0	0
AT5G09840.1	0	0	0	0	0	0	0	0	0	0	0	0	20983000	0	0	0	0	0	0	0	0	0	0	0
AT3G23940.2;AT3G23940.1	21002000	0	0	0	0	0	0	0	0	0	0	0	0	0	0	0	0	0	0	0	0	0	0	0
AT1G53280.1	0	0	0	0	0	0	0	0	0	0	0	0	21108000	0	0	0	0	0	0	0	0	0	0	0
AT3G56130.2;AT3G56130.1;AT3G56130.3;AT3G56130.4	0	0	0	0	0	0	0	0	0	0	0	0	21118000	0	0	0	0	0	0	0	0	0	0	0
AT3G55170.2;AT3G55170.1	0	0	0	0	0	0	0	0	0	0	21178000	0	0	0	0	0	0	0	0	0	0	0	0	0
AT1G01960.1;AT3G60860.1	0	0	0	0	0	0	0	0	0	0	0	0	21253000	0	0	0	0	0	0	0	0	0	0	0
AT2G46640.1;AT2G46640.2;AT2G46640.3	0	0	0	0	0	21460000	0	0	0	0	0	0	0	0	0	0	0	0	0	0	0	0	0	0
AT3G06860.1	10610000	0	0	0	0	0	0	0	0	0	0	0	10906000	0	0	0	0	0	0	0	0	0	0	0
AT1G23520.1	0	0	0	0	0	0	0	0	0	0	0	0	0	0	0	0	0	0	0	21568000	0	0	0	0
AT2G24940.1	0	0	0	0	0	0	0	0	0	0	0	0	0	21730000	0	0	0	0	0	0	0	0	0	0
AT1G79540.1	0	0	0	0	0	21763000	0	0	0	0	0	0	0	0	0	0	0	0	0	0	0	0	0	0
AT3G51160.1;AT5G66280.1	0	0	0	0	0	0	0	0	0	0	0	0	22129000	0	0	0	0	0	0	0	0	0	0	0
AT3G53750.1;AT2G37620.2;AT2G37620.1	22145000	0	0	0	0	0	0	0	0	0	0	0	0	0	0	0	0	0	0	0	0	0	0	0
ATMG00090.1	0	22329000	0	0	0	0	0	0	0	0	0	0	0	0	0	0	0	0	0	0	0	0	0	0
AT1G52930.1;AT3G15460.1	0	0	0	0	0	0	0	0	0	0	0	0	0	0	0	0	0	0	0	0	0	0	22360000	0
AT3G58180.1	0	0	0	0	22372000	0	0	0	0	0	0	0	0	0	0	0	0	0	0	0	0	0	0	0
AT4G20360.1	0	0	0	0	0	0	0	0	0	0	0	0	22377000	0	0	0	0	0	0	0	0	0	0	0
AT1G68590.2;AT1G68590.1	0	0	0	0	0	0	0	0	22428000	0	0	0	0	0	0	0	0	0	0	0	0	0	0	0
AT5G62670.1	0	0	22431000	0	0	0	0	0	0	0	0	0	0	0	0	0	0	0	0	0	0	0	0	0
AT4G17140.1;AT4G17140.2;AT4G17140.3	0	0	0	0	0	0	0	0	0	0	0	0	22438000	0	0	0	0	0	0	0	0	0	0	0
AT3G45310.2;AT3G45310.1	0	0	0	0	0	0	0	0	0	0	0	0	22781000	0	0	0	0	0	0	0	0	0	0	0
AT2G35980.1	0	0	0	0	0	0	0	0	22280000	0	0	0	0	0	567810	0	0	0	0	0	0	0	0	0
AT1G11860.3;AT1G11860.2;AT1G11860.1	0	0	0	0	0	0	0	0	0	0	0	0	22930000	0	0	0	0	0	0	0	0	0	0	0
AT3G54210.1	0	0	22958000	0	0	0	0	0	0	0	0	0	0	0	0	0	0	0	0	0	0	0	0	0
ATCG00820.1	0	0	0	0	0	0	0	23019000	0	0	0	0	0	0	0	0	0	0	0	0	0	0	0	0
AT3G20390.1	23088000	0	0	0	0	0	0	0	0	0	0	0	0	0	0	0	0	0	0	0	0	0	0	0
AT4G38680.1	0	0	0	23226000	0	0	0	0	0	0	0	0	0	0	0	0	0	0	0	0	0	0	0	0
AT3G58990.1	0	0	0	0	0	0	0	0	0	0	0	0	0	0	23431000	0	0	0	0	0	0	0	0	0
AT2G27510.1	0	0	0	0	0	0	0	0	0	0	0	0	0	0	0	0	0	0	23600000	0	0	0	0	0
AT2G45790.1	0	0	0	0	0	0	0	0	0	0	0	0	7415600	0	16228000	0	0	0	0	0	0	0	0	0
AT1G64790.1;AT1G64790.2	0	0	0	0	0	0	0	0	0	0	0	0	24007000	0	0	0	0	0	0	0	0	0	0	0
AT1G22920.2;AT1G22920.1;AT1G71230.1	0	0	0	0	0	0	24077000	0	0	0	0	0	0	0	0	0	0	0	0	0	0	0	0	0
AT4G02510.1	0	0	0	0	0	0	0	0	0	0	0	0	24105000	0	0	0	0	0	0	0	0	0	0	0
AT3G54640.1	0	0	0	0	0	0	0	0	0	0	0	0	0	0	24143000	0	0	0	0	0	0	0	0	0
AT1G79940.4;AT1G79940.3;AT1G79940.2;AT1G79940.1;AT5G41020.1;AT5G44870.1	10614000	0	0	0	0	0	0	0	0	0	0	0	13577000	0	0	0	0	0	0	0	0	0	0	0
AT4G31460.1	0	0	0	24209000	0	0	0	0	0	0	0	0	0	0	0	0	0	0	0	0	0	0	0	0
AT3G13790.2;AT3G13790.1	0	0	0	0	0	0	0	0	0	0	0	0	0	0	0	0	0	0	24319000	0	0	0	0	0
AT3G01670.1	0	0	0	0	0	0	0	0	0	0	0	0	0	0	0	0	0	0	0	0	0	0	0	24410000
AT1G13320.2;AT1G13320.3;AT1G13320.1	0	0	0	0	0	0	0	0	0	0	0	0	20779000	0	0	0	0	0	0	3677100	0	0	0	0
AT4G26300.1;AT1G66530.1	24496000	0	0	0	0	0	0	0	0	0	0	0	0	0	0	0	0	0	0	0	0	0	0	0
AT2G16430.2	0	0	24724000	0	0	0	0	0	0	0	0	0	0	0	0	0	0	0	0	0	0	0	0	0
AT4G02030.1;AT4G02030.2	0	0	0	0	0	0	0	0	0	0	0	0	24955000	0	0	0	0	0	0	0	0	0	0	0
AT4G32970.1	0	24983000	0	0	0	0	0	0	0	0	0	0	0	0	0	0	0	0	0	0	0	0	0	0
AT3G22845.1	0	0	0	0	0	0	0	0	0	0	0	0	25007000	0	0	0	0	0	0	0	0	0	0	0
AT5G14780.1	0	0	0	0	0	0	0	0	0	0	0	0	0	0	0	0	0	0	25230000	0	0	0	0	0
AT5G02570.1;AT3G09480.1;AT2G37470.1;AT5G22880.1;AT3G46030.1;AT1G07790.1;AT5G59910.1;AT3G45980.1;AT2G28720.1;AT3G53650.1	0	0	0	0	0	0	0	0	0	0	0	0	25531000	0	0	0	0	0	0	0	0	0	0	0
AT3G61415.2;AT3G61415.1	0	0	0	0	0	0	0	0	0	0	0	0	0	0	0	0	0	0	0	0	0	25596000	0	0
AT5G23400.1	25612000	0	0	0	0	0	0	0	0	0	0	0	0	0	0	0	0	0	0	0	0	0	0	0
AT3G62290.3;AT3G62290.2;AT3G62290.1;AT2G47170.1;AT1G70490.3;AT1G70490.2;AT1G70490.1;AT1G23490.1;AT1G10630.1;AT5G14670.1	0	0	0	0	0	0	0	0	0	0	0	0	0	0	25817000	0	0	0	0	0	0	0	0	0
AT3G05020.1	25856000	0	0	0	0	0	0	0	0	0	0	0	0	0	0	0	0	0	0	0	0	0	0	0
AT5G10540.1;AT5G65620.1	25858000	0	0	0	0	0	0	0	0	0	0	0	0	0	0	0	0	0	0	0	0	0	0	0
AT3G27530.1	26078000	0	0	0	0	0	0	0	0	0	0	0	0	0	0	0	0	0	0	0	0	0	0	0
AT5G13520.1	19164000	0	0	0	0	0	0	0	0	0	0	0	7168500	0	0	0	0	0	0	0	0	0	0	0
AT2G42500.2;AT3G58500.1;AT2G42500.1	26349000	0	0	0	0	0	0	0	0	0	0	0	0	0	0	0	0	0	0	0	0	0	0	0
AT3G19430.1	0	0	0	0	0	0	0	0	0	0	0	0	0	0	0	0	26412000	0	0	0	0	0	0	0
AT5G28540.1;AT1G09080.2;AT1G09080.1	26441000	0	0	0	0	0	0	0	0	0	0	0	0	0	0	0	0	0	0	0	0	0	0	0
AT5G56350.1	0	0	0	0	0	0	0	0	0	0	0	0	26671000	0	0	0	0	0	0	0	0	0	0	0
AT4G36760.1	0	0	0	0	0	0	0	0	0	0	0	0	18460000	0	8263200	0	0	0	0	0	0	0	0	0
AT5G16280.2;AT5G16280.1	0	0	0	0	0	0	0	0	0	0	0	0	26871000	0	0	0	0	0	0	0	0	0	0	0
AT2G40360.1	0	0	0	0	0	0	0	0	0	0	26889000	0	0	0	0	0	0	0	0	0	0	0	0	0
AT3G20120.2;AT3G20120.1	0	0	0	0	26995000	0	0	0	0	0	0	0	0	0	0	0	0	0	0	0	0	0	0	0
AT1G75330.1	0	0	0	0	0	0	0	0	0	0	0	0	4709700	0	22391000	0	0	0	0	0	0	0	0	0
AT2G19760.1	0	0	0	0	0	0	0	0	0	0	0	0	27158000	0	0	0	0	0	0	0	0	0	0	0
AT5G53480.1	0	0	0	0	0	0	0	0	0	0	0	0	25675000	0	0	0	0	0	0	1495200	0	0	0	0
AT4G18430.1	0	0	0	0	0	0	0	0	27335000	0	0	0	0	0	0	0	0	0	0	0	0	0	0	0
AT2G14170.2;AT2G14170.1;AT2G14170.3	0	0	0	0	0	0	0	0	0	0	0	0	27630000	0	0	0	0	0	0	0	0	0	0	0
AT5G43530.1	0	0	0	0	0	0	0	27699000	0	0	0	0	0	0	0	0	0	0	0	0	0	0	0	0
AT3G04400.2	0	0	0	0	0	27804000	0	0	0	0	0	0	0	0	0	0	0	0	0	0	0	0	0	0
AT5G16390.2;AT5G16390.1;AT5G15530.1	0	0	0	0	0	0	0	0	0	0	0	0	27939000	0	0	0	0	0	0	0	0	0	0	0
AT4G04910.1	19927000	0	0	0	0	0	0	0	8042400	0	0	0	0	0	0	0	0	0	0	0	0	0	0	0
ATCG01240.1;ATCG00900.1	0	0	0	0	0	0	0	0	28074000	0	0	0	0	0	0	0	0	0	0	0	0	0	0	0
AT3G53520.3;AT3G53520.2;AT3G53520.1;AT3G53520.4	0	0	0	0	0	0	0	0	0	0	0	0	0	0	0	0	0	0	0	28765000	0	0	0	0
AT4G26690.1	28893000	0	0	0	0	0	0	0	0	0	0	0	0	0	0	0	0	0	0	0	0	0	0	0
AT5G09510.1;AT5G09510.2	0	0	0	0	28911000	0	0	0	0	0	0	0	0	0	0	0	0	0	0	0	0	0	0	0
AT1G31812.1	0	0	0	0	0	0	0	0	0	0	0	0	0	0	0	0	0	0	29247000	0	0	0	0	0
AT5G16440.1	0	29273000	0	0	0	0	0	0	0	0	0	0	0	0	0	0	0	0	0	0	0	0	0	0
AT1G23280.1	0	0	0	0	0	0	0	0	0	0	0	0	0	0	0	0	0	0	0	0	0	0	29562000	0
AT2G14720.2;AT2G14720.1;AT2G14740.2;AT2G14740.1	0	0	0	0	0	0	30010000	0	0	0	0	0	0	0	0	0	0	0	0	0	0	0	0	0
AT4G35260.1;AT2G17130.2;AT2G17130.1	0	0	0	0	0	0	0	0	0	0	0	0	17288000	0	0	0	0	0	0	0	12785000	0	0	0
AT5G66120.2;AT5G66120.1	30126000	0	0	0	0	0	0	0	0	0	0	0	0	0	0	0	0	0	0	0	0	0	0	0
AT4G02080.1;AT3G62560.1;AT1G56330.1;AT1G09180.1	22128000	0	0	0	0	0	0	0	0	0	0	0	8164500	0	0	0	0	0	0	0	0	0	0	0
AT3G18600.1	0	0	0	0	0	0	0	0	0	0	0	0	0	0	0	0	0	0	0	0	0	0	30408000	0
AT4G02290.1;AT4G38990.1;AT4G09740.1;AT4G23560.1;AT1G23210.1;AT1G70710.1;AT4G39010.1;AT1G02800.1	30482000	0	0	0	0	0	0	0	0	0	0	0	0	0	0	0	0	0	0	0	0	0	0	0
AT1G74910.3;AT1G74910.2;AT1G74910.1;AT2G04650.1	30572000	0	0	0	0	0	0	0	0	0	0	0	0	0	0	0	0	0	0	0	0	0	0	0
AT5G65750.1	0	0	0	0	0	0	0	0	0	0	0	0	30632000	0	0	0	0	0	0	0	0	0	0	0
AT4G15640.1	0	0	0	0	0	0	0	0	30892000	0	0	0	0	0	0	0	0	0	0	0	0	0	0	0
AT5G28840.2;AT5G28840.1	31080000	0	0	0	0	0	0	0	0	0	0	0	0	0	0	0	0	0	0	0	0	0	0	0
AT5G22060.1	0	0	0	0	0	0	0	0	0	0	0	0	31410000	0	0	0	0	0	0	0	0	0	0	0
AT2G44160.1	31441000	0	0	0	0	0	0	0	0	0	0	0	0	0	0	0	0	0	0	0	0	0	0	0
AT4G14030.2;AT4G14030.1	0	0	0	0	0	0	0	0	0	0	0	0	31499000	0	0	0	0	0	0	0	0	0	0	0
AT3G25290.2;AT3G25290.1	0	0	0	0	0	0	0	0	0	0	0	0	31525000	0	0	0	0	0	0	0	0	0	0	0
AT1G48350.1	0	0	31616000	0	0	0	0	0	0	0	0	0	0	0	0	0	0	0	0	0	0	0	0	0
AT4G24220.2;AT4G24220.1	0	0	0	0	0	0	0	0	0	0	0	0	0	0	31628000	0	0	0	0	0	0	0	0	0
AT5G25100.1;AT5G10840.1;AT5G25100.2	0	0	0	0	0	0	0	0	0	0	0	0	31950000	0	0	0	0	0	0	0	0	0	0	0
AT5G20080.1	11163000	0	0	0	0	0	0	0	0	0	0	0	11058000	0	10122000	0	0	0	0	0	0	0	0	0
AT3G61760.1	0	0	0	0	0	0	0	0	0	0	0	0	0	0	0	0	0	0	0	32580000	0	0	0	0
AT1G63070.1;AT1G63080.1	0	0	0	0	0	32849000	0	0	0	0	0	0	0	0	0	0	0	0	0	0	0	0	0	0
ATCG00270.1	13437000	0	0	0	0	0	0	0	0	0	0	0	19550000	0	0	0	0	0	0	0	0	0	0	0
AT1G15210.1;AT3G16340.2;AT3G16340.1;AT1G15520.1;AT2G29940.1;AT1G66950.1;AT3G30842.1;AT2G26910.1	0	0	0	0	0	0	0	0	0	0	0	0	33066000	0	0	0	0	0	0	0	0	0	0	0
ATCG00020.1	0	0	0	0	0	0	16996000	0	0	0	0	0	16393000	0	0	0	0	0	0	0	0	0	0	0
AT3G61530.2;AT3G61530.1	0	0	33798000	0	0	0	0	0	0	0	0	0	0	0	0	0	0	0	0	0	0	0	0	0
AT3G51890.1	0	0	0	0	0	0	0	0	0	0	0	0	0	33800000	0	0	0	0	0	0	0	0	0	0
AT5G27970.1;AT5G27970.2	0	0	0	0	0	0	0	0	0	0	0	0	34327000	0	0	0	0	0	0	0	0	0	0	0
AT1G03930.1;AT5G44100.1	0	0	0	0	0	34330000	0	0	0	0	0	0	0	0	0	0	0	0	0	0	0	0	0	0
AT4G28710.1;AT1G04160.1;AT5G43900.1;AT5G43900.3	18348000	0	0	0	0	0	0	0	0	0	0	0	16224000	0	0	0	0	0	0	0	0	0	0	0
AT5G03300.1	34689000	0	0	0	0	0	0	0	0	0	0	0	0	0	0	0	0	0	0	0	0	0	0	0
AT4G24830.2;AT4G24830.1	0	0	0	0	0	0	0	12074000	0	0	0	0	22677000	0	0	0	0	0	0	0	0	0	0	0
AT3G60830.1	34792000	0	0	0	0	0	0	0	0	0	0	0	0	0	0	0	0	0	0	0	0	0	0	0
AT3G22630.1	35004000	0	0	0	0	0	0	0	0	0	0	0	0	0	0	0	0	0	0	0	0	0	0	0
AT1G09750.1	35432000	0	0	0	0	0	0	0	0	0	0	0	0	0	0	0	0	0	0	0	0	0	0	0
AT2G47000.1;AT3G62150.1;AT1G02520.1;AT4G01820.1;AT4G01830.1;AT4G18050.1;AT5G46540.1;AT3G28860.1;AT2G36910.1	0	0	0	0	0	0	0	0	0	0	0	0	35677000	0	0	0	0	0	0	0	0	0	0	0
AT1G36160.2;AT1G36160.1;AT1G36180.1	0	0	0	0	0	0	0	0	0	0	0	0	35768000	0	0	0	0	0	0	0	0	0	0	0
AT4G33650.1;AT4G33650.2	21089000	0	0	0	0	0	0	0	0	0	0	0	15018000	0	0	0	0	0	0	0	0	0	0	0
AT5G53780.1	0	0	0	0	0	0	0	0	0	0	0	0	0	0	0	0	0	0	0	0	0	0	36282000	0
AT3G52370.1;AT2G35860.1;AT5G06390.1	20798000	0	0	0	0	0	0	0	0	0	0	0	16127000	0	0	0	0	0	0	0	0	0	0	0
AT4G31720.2;AT4G31720.1	0	0	0	36989000	0	0	0	0	0	0	0	0	0	0	0	0	0	0	0	0	0	0	0	0
AT5G39570.1	0	0	37024000	0	0	0	0	0	0	0	0	0	0	0	0	0	0	0	0	0	0	0	0	0
AT3G16890.1	0	0	0	0	0	37175000	0	0	0	0	0	0	0	0	0	0	0	0	0	0	0	0	0	0
AT5G14320.2;AT5G14320.1	0	0	0	0	0	0	0	0	37261000	0	0	0	0	0	0	0	0	0	0	0	0	0	0	0
AT5G17990.1	0	0	0	0	0	0	0	0	0	0	0	0	37281000	0	0	0	0	0	0	0	0	0	0	0
AT5G52640.1	0	38119000	0	0	0	0	0	0	0	0	0	0	0	0	0	0	0	0	0	0	0	0	0	0
AT3G53180.1	0	0	0	0	0	0	0	0	0	0	0	0	38138000	0	0	0	0	0	0	0	0	0	0	0
AT1G21100.1;AT1G21120.1;AT1G21110.1;AT1G21130.2;AT1G76790.1;AT1G21130.1	36465000	0	0	0	0	0	0	0	0	0	0	0	1851100	0	0	0	0	0	0	0	0	0	0	0
AT1G32380.1	0	0	0	0	0	0	0	0	28430000	0	0	0	9889000	0	0	0	0	0	0	0	0	0	0	0
AT3G51800.3;AT3G51800.1;AT3G51800.2	0	0	0	0	0	0	0	0	15097000	0	0	0	0	0	0	0	0	0	0	0	0	0	23776000	0
AT5G20650.1	0	38877000	0	0	0	0	0	0	0	0	0	0	0	0	0	0	0	0	0	0	0	0	0	0
AT1G58270.1	0	0	0	0	0	0	0	0	38889000	0	0	0	0	0	0	0	0	0	0	0	0	0	0	0
AT1G49400.1	0	0	0	0	0	0	0	0	0	0	0	0	0	38947000	0	0	0	0	0	0	0	0	0	0
AT5G11170.2;AT5G11200.1;AT5G11170.1;AT5G11200.3;AT5G11200.2	0	0	0	0	0	0	0	0	0	0	0	0	38956000	0	0	0	0	0	0	0	0	0	0	0
AT5G02490.1;AT1G56410.1	0	0	0	0	0	0	0	0	0	0	0	0	39146000	0	0	0	0	0	0	0	0	0	0	0
AT5G15960.1	0	0	0	0	0	0	0	0	0	0	0	0	0	0	0	0	0	0	0	0	0	0	0	39363000
AT1G70410.3;AT1G70410.1;AT1G70410.2	0	0	0	0	0	0	0	0	0	0	0	0	0	39370000	0	0	0	0	0	0	0	0	0	0
AT3G29796.1	0	0	0	0	39405000	0	0	0	0	0	0	0	0	0	0	0	0	0	0	0	0	0	0	0
AT1G12230.1;AT1G12230.2	19008000	0	0	0	0	0	0	0	0	0	0	0	20516000	0	0	0	0	0	0	0	0	0	0	0
AT3G25530.2;AT3G25530.1	19386000	0	0	0	0	0	0	0	0	0	0	0	20532000	0	0	0	0	0	0	0	0	0	0	0
AT5G14250.1;AT5G14250.2	0	0	0	0	0	0	0	0	0	0	0	0	40658000	0	0	0	0	0	0	0	0	0	0	0
AT1G73370.2;AT1G73370.1	0	0	0	0	0	0	0	0	0	0	0	0	40708000	0	0	0	0	0	0	0	0	0	0	0
AT2G22125.1	0	0	0	0	0	0	0	0	0	0	0	0	40781000	0	0	0	0	0	0	0	0	0	0	0
AT5G13780.1	0	0	0	0	0	0	0	0	0	0	0	0	41066000	0	0	0	0	0	0	0	0	0	0	0
AT4G33680.1	0	0	0	0	0	0	0	0	0	0	0	0	0	0	0	0	41675000	0	0	0	0	0	0	0
AT2G26080.1	0	0	0	0	0	0	0	0	0	0	0	0	32552000	0	0	0	0	0	0	0	0	0	9271400	0
AT3G19980.1;AT1G50370.1	21039000	0	0	0	0	0	0	0	0	0	0	0	20981000	0	0	0	0	0	0	0	0	0	0	0
AT4G12600.1;AT4G12600.2;AT5G20160.3	0	0	0	0	0	0	0	0	0	0	0	0	0	0	0	0	0	0	0	0	0	0	42111000	0
AT5G02900.1	0	0	0	0	42244000	0	0	0	0	0	0	0	0	0	0	0	0	0	0	0	0	0	0	0
AT1G65960.2;AT1G65960.1	0	0	0	0	0	0	0	0	42892000	0	0	0	0	0	0	0	0	0	0	0	0	0	0	0
AT4G16190.1	43017000	0	0	0	0	0	0	0	0	0	0	0	0	0	0	0	0	0	0	0	0	0	0	0
AT2G02390.2;AT2G02390.1;AT2G02390.3	0	0	0	0	0	0	0	0	0	0	0	0	43334000	0	0	0	0	0	0	0	0	0	0	0
ATCG00810.1	0	0	0	0	0	0	0	0	43397000	0	0	0	0	0	0	0	0	0	0	0	0	0	0	0
AT5G39320.1	26511000	0	0	0	0	0	0	0	0	0	0	0	17194000	0	0	0	0	0	0	0	0	0	0	0
AT4G30220.1	0	0	0	0	0	0	0	0	0	0	0	0	0	0	0	0	0	0	43767000	0	0	0	0	0
AT5G65950.1	0	0	0	0	0	0	0	0	0	0	0	0	43820000	0	0	0	0	0	0	0	0	0	0	0
AT3G16050.1	0	0	0	0	0	0	0	0	0	0	0	0	44057000	0	0	0	0	0	0	0	0	0	0	0
AT4G13770.1	0	0	11471000	0	0	0	0	0	0	0	0	0	32851000	0	0	0	0	0	0	0	0	0	0	0
AT2G01970.1;AT1G14670.1	21562000	0	0	0	0	0	0	0	0	0	0	0	22923000	0	0	0	0	0	0	0	0	0	0	0
AT2G46520.1	27845000	0	0	0	0	0	0	0	0	0	0	0	16649000	0	0	0	0	0	0	0	0	0	0	0
AT2G31810.2;AT2G31810.1;AT2G31810.3	0	0	0	0	0	0	0	0	0	0	0	0	44662000	0	0	0	0	0	0	0	0	0	0	0
AT4G11600.1	14816000	0	0	0	0	0	0	10491000	20482000	0	0	0	0	0	0	0	0	0	0	0	0	0	0	0
AT5G07350.1;AT5G07350.2	46197000	0	0	0	0	0	0	0	0	0	0	0	0	0	0	0	0	0	0	0	0	0	0	0
AT1G25260.1	0	0	0	46215000	0	0	0	0	0	0	0	0	0	0	0	0	0	0	0	0	0	0	0	0
AT2G46750.1;AT5G56490.1;AT2G46740.1;AT2G46760.1	21595000	0	0	0	0	0	0	0	0	0	0	0	24932000	0	0	0	0	0	0	0	0	0	0	0
AT3G27190.1;AT5G40870.1	0	0	0	0	0	0	0	0	0	0	0	0	46544000	0	0	0	0	0	0	0	0	0	0	0
AT4G13180.1	0	0	0	0	0	0	0	0	0	0	0	0	42474000	0	0	0	0	0	1368200	2872200	0	0	0	0
AT4G22670.1	0	0	0	0	0	0	0	0	0	0	0	0	0	0	0	0	0	0	0	15285000	0	0	0	31632000
AT1G79210.3;AT1G79210.2;AT1G79210.1	47312000	0	0	0	0	0	0	0	0	0	0	0	0	0	0	0	0	0	0	0	0	0	0	0
AT1G74970.1	0	0	0	0	0	0	0	0	0	0	0	0	0	0	0	0	0	0	0	47829000	0	0	0	0
AT1G14810.1	22741000	0	0	0	0	0	0	0	0	0	0	0	25564000	0	0	0	0	0	0	0	0	0	0	0
AT2G21160.2;AT2G21160.1	48952000	0	0	0	0	0	0	0	0	0	0	0	0	0	0	0	0	0	0	0	0	0	0	0
AT2G45960.2;AT2G45960.1;AT2G45960.3;AT4G00430.2;AT3G61430.2;AT3G61430.1;AT1G01620.1;AT4G00430.1	0	0	49310000	0	0	0	0	0	0	0	0	0	0	0	0	0	0	0	0	0	0	0	0	0
AT1G29930.1;AT1G29920.1;AT1G29910.1;AT2G05100.1;AT2G05070.1;AT3G27690.1	0	0	0	0	0	0	50070000	0	0	0	0	0	0	0	0	0	0	0	0	0	0	0	0	0
AT3G48530.1	22675000	0	0	0	0	0	0	0	0	0	0	0	17664000	0	9964800	0	0	0	0	0	0	0	0	0
AT2G30210.1;AT5G07130.1	0	50658000	0	0	0	0	0	0	0	0	0	0	0	0	0	0	0	0	0	0	0	0	0	0
AT2G30110.1	27291000	0	0	0	0	0	0	0	0	0	0	0	0	0	23509000	0	0	0	0	0	0	0	0	0
AT5G08570.1;AT4G26390.1;AT3G25960.1;AT3G04050.1;AT3G55650.1	0	0	0	0	0	0	0	0	0	0	0	0	51260000	0	0	0	0	0	0	0	0	0	0	0
AT2G47960.1	23543000	0	0	0	0	0	0	0	0	0	0	0	14214000	0	0	0	0	0	13672000	0	0	0	0	0
AT5G63600.1;AT5G63600.2	19329000	0	0	0	0	0	9644600	0	0	0	0	0	6816500	15828000	0	0	0	0	0	0	0	0	0	0
AT4G16990.5;AT4G16990.3;AT4G16990.4;AT4G16990.1;AT4G16990.2	0	0	0	0	0	51653000	0	0	0	0	0	0	0	0	0	0	0	0	0	0	0	0	0	0
AT4G33360.2;AT4G33360.3;AT4G33360.1	0	0	0	0	0	0	0	0	0	0	0	0	25792000	0	25893000	0	0	0	0	0	0	0	0	0
AT3G57150.1	0	0	0	0	0	0	0	0	0	0	0	0	0	0	0	0	0	0	0	0	0	0	51840000	0
AT4G24620.2;AT4G24620.1	34181000	0	0	0	0	0	0	0	0	0	0	0	18057000	0	0	0	0	0	0	0	0	0	0	0
AT4G10840.1;AT4G10840.2	0	0	0	0	0	0	0	0	0	0	0	0	52260000	0	0	0	0	0	0	0	0	0	0	0
AT5G51430.1	23392000	14741000	0	0	0	0	0	0	0	0	0	0	0	14165000	0	0	0	0	0	0	0	0	0	0
AT3G43300.2;AT3G43300.1	24665000	0	0	0	0	0	0	0	13623000	0	0	0	14177000	0	0	0	0	0	0	0	0	0	0	0
AT5G56760.1	0	0	0	0	0	0	30715000	0	0	0	0	0	22230000	0	0	0	0	0	0	0	0	0	0	0
AT4G23630.1	24840000	0	0	0	0	0	0	0	0	0	0	0	28925000	0	0	0	0	0	0	0	0	0	0	0
AT5G07090.1;AT2G17360.1;AT2G17360.2	0	0	0	0	0	54541000	0	0	0	0	0	0	0	0	0	0	0	0	0	0	0	0	0	0
AT3G03920.1	0	0	0	0	0	0	0	0	0	0	23499000	0	0	0	0	0	0	0	0	0	0	0	31543000	0
AT5G55140.1	0	0	0	0	0	0	0	0	55086000	0	0	0	0	0	0	0	0	0	0	0	0	0	0	0
AT5G53460.3;AT5G53460.2;AT5G53460.1	0	0	0	0	0	0	0	0	0	0	0	0	35098000	0	20098000	0	0	0	0	0	0	0	0	0
AT1G26630.1;AT1G26630.2	0	0	0	0	0	0	55945000	0	0	0	0	0	0	0	0	0	0	0	0	0	0	0	0	0
AT4G14960.2;AT4G14960.1	0	56243000	0	0	0	0	0	0	0	0	0	0	0	0	0	0	0	0	0	0	0	0	0	0
AT2G39730.3;AT2G39730.2;AT2G39730.1	0	0	0	0	0	0	0	0	44535000	0	0	0	11840000	0	0	0	0	0	0	0	0	0	0	0
AT2G38020.2;AT2G38020.1	23621000	0	0	0	0	0	0	0	0	0	0	0	33187000	0	0	0	0	0	0	0	0	0	0	0
AT1G70310.1	33683000	0	0	0	0	0	0	0	0	0	0	0	23544000	0	0	0	0	0	0	0	0	0	0	0
ATMG00980.1;AT2G07675.1;AT2G07773.1	0	55224000	0	0	0	0	0	0	0	0	0	0	0	0	2196900	0	0	0	0	0	0	0	0	0
AT1G35680.1	0	0	0	0	0	0	0	0	0	57951000	0	0	0	0	0	0	0	0	0	0	0	0	0	0
AT1G50200.2;AT1G50200.1	33822000	0	0	0	0	0	0	0	0	0	0	0	24375000	0	0	0	0	0	0	0	0	0	0	0
AT4G33720.1	0	0	0	0	0	0	0	0	0	0	0	0	0	19835000	0	0	0	0	0	38446000	0	0	0	0
AT3G14067.1	0	0	0	0	0	0	0	0	0	0	0	0	58549000	0	0	0	0	0	0	0	0	0	0	0
AT1G07210.1	0	0	0	0	0	0	0	0	0	0	0	0	0	59992000	0	0	0	0	0	0	0	0	0	0
AT3G54960.1;AT3G54960.2	31300000	0	0	0	0	0	0	0	15294000	0	0	0	13574000	0	0	0	0	0	0	0	0	0	0	0
AT5G16050.1	0	0	0	0	0	0	0	0	0	0	0	0	0	0	60213000	0	0	0	0	0	0	0	0	0
AT2G46110.1	0	0	0	0	0	0	0	29308000	0	0	0	0	0	0	31976000	0	0	0	0	0	0	0	0	0
AT4G21710.1	0	0	0	0	0	0	0	0	0	0	0	0	12796000	0	48553000	0	0	0	0	0	0	0	0	0
AT5G15550.2;AT5G15550.1	0	0	0	0	0	0	0	0	0	0	0	0	0	0	0	0	0	0	0	0	0	0	61550000	0
AT1G73650.1;AT1G73650.4;AT1G73650.2;AT1G73650.3	0	0	0	0	0	0	0	0	24458000	0	0	0	0	0	0	0	0	0	0	0	37396000	0	0	0
AT2G01350.2;AT2G01350.4;AT2G01350.3;AT2G01350.1	20691000	0	0	0	0	0	0	0	8959900	0	0	0	33067000	0	0	0	0	0	0	0	0	0	0	0
AT1G76680.1;AT1G76680.2;AT1G76690.1;AT1G18020.1;AT1G17990.1	49529000	0	0	0	0	0	0	0	0	0	0	0	7785000	0	5688900	0	0	0	0	0	0	0	0	0
AT1G33590.1;AT1G33612.1	27351000	0	0	0	0	0	0	0	0	0	0	0	36186000	0	0	0	0	0	0	0	0	0	0	0
AT1G50480.1	0	0	0	0	0	0	0	0	25555000	0	0	0	0	0	0	0	0	0	0	0	0	0	38194000	0
AT3G06310.3;AT3G06310.1;AT3G06310.2	0	0	0	0	0	0	0	0	0	0	0	0	0	0	0	0	0	0	0	0	63969000	0	0	0
AT2G27900.2;AT2G27900.1	0	0	0	0	0	63998000	0	0	0	0	0	0	0	0	0	0	0	0	0	0	0	0	0	0
AT2G41475.1	0	0	0	0	0	0	0	0	0	0	0	0	0	0	65916000	0	0	0	0	0	0	0	0	0
AT5G11520.1	29100000	20690000	0	0	0	0	0	0	0	0	0	0	16219000	0	0	0	0	0	0	0	0	0	0	0
AT1G43800.1	0	0	0	0	0	0	0	0	0	0	0	0	66013000	0	0	0	0	0	0	0	0	0	0	0
AT3G59920.1	38742000	0	0	0	0	0	0	0	0	0	0	0	27564000	0	0	0	0	0	0	0	0	0	0	0
AT1G60780.1;AT1G10730.1	32122000	0	0	0	0	0	0	0	0	0	0	0	34392000	0	0	0	0	0	0	0	0	0	0	0
AT3G58510.3;AT3G58510.2;AT3G58510.1;AT3G58570.1	43230000	0	0	0	0	0	0	0	23453000	0	0	0	0	0	0	0	0	0	0	0	0	0	0	0
AT1G73990.1	0	0	0	0	0	0	0	0	0	0	0	0	7837100	10355000	6125700	0	0	0	42723000	0	0	0	0	0
AT1G22360.2;AT1G22360.1	0	0	0	0	0	0	0	0	0	0	0	0	67128000	0	0	0	0	0	0	0	0	0	0	0
AT3G07300.2;AT3G07300.1;AT3G07300.3	0	0	0	0	0	0	0	10381000	31240000	0	0	0	25752000	0	0	0	0	0	0	0	0	0	0	0
AT5G15220.1;AT2G16930.3;AT2G16930.2;AT2G16930.1	0	0	67693000	0	0	0	0	0	0	0	0	0	0	0	0	0	0	0	0	0	0	0	0	0
AT2G21410.1	0	0	0	0	0	0	0	0	0	0	0	0	0	49542000	0	0	0	0	0	18963000	0	0	0	0
AT5G45070.1	0	0	0	0	0	0	37233000	0	27082000	0	0	0	4231800	0	0	0	0	0	0	0	0	0	0	0
AT2G04865.1	0	68817000	0	0	0	0	0	0	0	0	0	0	0	0	0	0	0	0	0	0	0	0	0	0
AT1G74260.1	0	0	0	0	0	0	0	0	0	0	0	0	69679000	0	0	0	0	0	0	0	0	0	0	0
AT5G15520.1	0	0	0	0	0	0	0	44373000	0	0	0	0	0	0	0	0	0	0	0	25453000	0	0	0	0
AT1G31230.1	34216000	0	0	0	0	0	0	0	0	0	0	0	35887000	0	0	0	0	0	0	0	0	0	0	0
AT3G49720.2;AT3G49720.1;AT5G65810.1	0	0	0	0	0	0	25693000	0	0	0	0	0	11994000	0	0	0	0	0	33520000	0	0	0	0	0
AT5G26780.1;AT5G26780.3;AT5G26780.2;AT4G37930.1	0	0	0	0	0	0	0	18441000	53664000	0	0	0	0	0	0	0	0	0	0	0	0	0	0	0
AT2G40290.3;AT2G40290.2;AT2G40290.1	0	0	0	0	0	0	0	0	14945000	0	0	0	0	0	29640000	0	12020000	0	0	0	0	0	0	15654000
AT4G29430.1	0	0	0	0	0	0	0	0	0	0	0	0	0	72529000	0	0	0	0	0	0	0	0	0	0
AT1G03230.1	0	0	0	0	0	0	0	0	0	0	0	0	72546000	0	0	0	0	0	0	0	0	0	0	0
AT4G36420.1	0	0	0	0	0	0	0	0	46559000	0	0	0	0	0	0	0	0	0	0	0	0	0	26455000	0
AT3G56910.1	0	0	0	0	0	0	0	0	0	0	0	0	0	0	73660000	0	0	0	0	0	0	0	0	0
AT2G44060.2;AT2G44060.1	31435000	0	0	0	0	0	0	0	0	0	0	0	0	0	0	0	0	0	0	42256000	0	0	0	0
AT1G26910.1	0	0	0	0	0	0	0	0	0	0	0	0	0	0	0	0	0	0	0	0	0	0	0	73709000
AT1G73330.1	44222000	0	0	0	0	0	0	0	0	0	0	0	29996000	0	0	0	0	0	0	0	0	0	0	0
AT5G39850.1	0	0	0	0	0	0	0	0	0	0	0	0	0	0	0	0	35849000	0	0	38644000	0	0	0	0
AT5G35430.1	74783000	0	0	0	0	0	0	0	0	0	0	0	0	0	0	0	0	0	0	0	0	0	0	0
AT1G04750.2;AT1G04750.1;AT2G33120.1;AT2G33120.2;AT2G33120.3;AT2G33110.1;AT1G04760.1;AT2G32670.1	0	0	30000000	0	0	0	0	0	0	0	0	0	0	0	45645000	0	0	0	0	0	0	0	0	0
AT3G06050.1	19191000	0	0	0	0	0	0	0	16566000	0	0	0	20534000	0	0	0	0	0	0	0	0	0	19426000	0
AT2G33450.1	0	0	37082000	0	0	0	0	0	39181000	0	0	0	0	0	0	0	0	0	0	0	0	0	0	0
AT4G02930.1	29153000	0	0	0	0	0	0	0	0	0	0	0	37471000	0	0	0	0	0	0	10488000	0	0	0	0
AT5G27820.1	0	0	0	0	0	0	0	0	0	0	0	0	0	0	77820000	0	0	0	0	0	0	0	0	0
AT5G58430.1	0	0	0	0	77862000	0	0	0	0	0	0	0	0	0	0	0	0	0	0	0	0	0	0	0
AT5G65430.2;AT5G65430.1;AT5G65430.3	34873000	0	0	0	0	0	0	0	0	0	0	0	43485000	0	0	0	0	0	0	0	0	0	0	0
AT1G67730.1	48161000	0	0	0	0	0	30272000	0	0	0	0	0	0	0	0	0	0	0	0	0	0	0	0	0
AT1G26740.1	0	0	0	0	0	0	0	0	0	0	0	0	0	0	717350	78746000	0	0	0	0	0	0	0	0
AT2G06850.1	40830000	0	0	0	0	0	0	0	0	0	0	0	23296000	0	16060000	0	0	0	0	0	0	0	0	0
AT1G04690.1	24577000	0	0	0	0	0	0	0	0	0	0	0	41443000	0	14625000	0	0	0	0	0	0	0	0	0
AT1G08830.2;AT1G08830.1	0	0	0	0	0	0	0	0	0	0	0	0	0	0	0	0	0	0	30475000	0	50218000	0	0	0
AT3G22850.1;AT5G43830.1	0	0	0	0	0	0	0	18416000	0	0	0	0	0	22075000	0	0	0	0	0	24638000	0	0	0	15826000
AT3G01680.1	38434000	0	0	0	0	0	0	0	0	0	0	0	44138000	0	0	0	0	0	0	0	0	0	0	0
AT5G16510.2;AT5G16510.1	24669000	0	0	0	0	0	0	0	0	0	0	0	28219000	0	30470000	0	0	0	0	0	0	0	0	0
AT5G40950.1	0	0	0	84605000	0	0	0	0	0	0	0	0	0	0	0	0	0	0	0	0	0	0	0	0
AT3G44230.1	0	0	85079000	0	0	0	0	0	0	0	0	0	0	0	0	0	0	0	0	0	0	0	0	0
AT2G38770.1	20497000	0	0	0	0	0	49230000	0	15813000	0	0	0	0	0	0	0	0	0	0	0	0	0	0	0
AT1G55020.1	22756000	0	0	0	0	0	19844000	0	0	0	0	0	43342000	0	0	0	0	0	0	0	0	0	0	0
AT3G16410.1	0	0	0	0	0	0	0	0	0	0	0	0	21889000	0	64265000	0	0	0	0	0	0	0	0	0
AT2G18740.2;AT4G30330.1;AT2G18740.1	0	0	0	0	0	0	0	35892000	29800000	0	0	0	20564000	0	0	0	0	0	0	0	0	0	0	0
AT2G41740.1	48039000	0	0	0	0	0	0	0	0	0	0	0	38798000	0	0	0	0	0	0	0	0	0	0	0
AT3G58150.1	0	0	0	0	87499000	0	0	0	0	0	0	0	0	0	0	0	0	0	0	0	0	0	0	0
AT1G78000.2;AT1G78000.1;AT4G08620.1;AT1G22150.1	0	0	0	0	0	0	0	0	0	0	0	0	0	0	90203000	0	0	0	0	0	0	0	0	0
AT1G65270.3;AT1G65270.2;AT1G65270.1	23579000	0	0	0	0	0	26439000	0	0	0	0	0	34587000	0	6092300	0	0	0	0	0	0	0	0	0
AT1G62380.1	0	0	0	0	0	0	0	0	0	0	0	0	26108000	25047000	0	0	40032000	0	0	0	0	0	0	0
AT2G16270.1	0	0	0	0	0	0	0	0	0	0	0	0	0	0	0	0	91641000	0	0	0	0	0	0	0
AT5G56270.1	0	0	0	0	92692000	0	0	0	0	0	0	0	0	0	0	0	0	0	0	0	0	0	0	0
AT5G23020.1	43450000	0	0	0	0	0	0	0	0	0	0	0	49297000	0	0	0	0	0	0	0	0	0	0	0
AT2G39770.2;AT2G39770.1;AT3G55590.1	40061000	0	0	0	0	0	0	0	0	0	0	0	52772000	0	0	0	0	0	0	0	0	0	0	0
AT4G25890.1	0	0	0	0	0	92883000	0	0	0	0	0	0	0	0	0	0	0	0	0	0	0	0	0	0
AT1G29250.1;AT2G34160.1;AT3G04620.1	0	0	0	0	0	0	0	0	0	0	0	0	12190000	0	0	0	59597000	0	7436600	15543000	0	0	0	0
AT2G15620.1	23253000	0	0	0	0	0	15317000	0	0	0	0	0	0	0	56301000	0	0	0	0	0	0	0	0	0
AT1G45000.1;AT1G45000.2	0	0	0	0	0	0	0	9283900	0	0	0	0	85913000	0	0	0	0	0	0	0	0	0	0	0
AT2G19940.2;AT2G19940.1	83310000	0	0	0	0	0	0	0	0	0	0	0	0	0	12474000	0	0	0	0	0	0	0	0	0
AT1G25490.1	49328000	0	0	0	0	0	0	0	0	0	0	0	46616000	0	0	0	0	0	0	0	0	0	0	0
AT3G16430.2;AT3G16430.1	0	0	0	0	0	0	0	0	0	0	0	0	0	0	0	0	0	0	96183000	0	0	0	0	0
AT3G28510.1	0	0	0	0	0	0	62526000	0	33916000	0	0	0	0	0	0	0	0	0	0	0	0	0	0	0
AT2G44065.2;AT2G44065.1	0	0	0	0	0	0	0	0	0	0	0	0	0	0	0	0	0	0	0	0	0	99380000	0	0
AT2G18720.1	0	0	0	99572000	0	0	0	0	0	0	0	0	0	0	0	0	0	0	0	0	0	0	0	0
AT1G04170.1	0	0	0	0	0	0	0	0	23081000	0	0	0	0	0	23227000	0	0	0	0	28588000	0	0	24723000	0
AT5G53560.1	58428000	0	0	0	0	0	0	0	0	0	0	0	0	0	34274000	0	0	0	0	7092900	0	0	0	0
AT2G26890.1	35830000	0	0	0	0	0	0	0	0	0	0	0	50073000	0	6561400	0	0	0	3264500	4632200	0	0	0	0
AT5G20160.1;AT5G20160.2;AT4G22380.1	0	0	0	0	0	0	0	0	28543000	0	51651000	0	20981000	0	0	0	0	0	0	0	0	0	0	0
AT3G05060.1	0	0	0	0	0	0	0	0	18040000	0	0	0	0	0	15342000	0	0	0	0	0	0	0	67916000	0
AT5G35940.1	0	0	0	0	0	0	0	0	0	0	0	0	0	0	78750000	0	0	0	0	22680000	0	0	0	0
AT5G54600.1;AT5G54600.2	0	0	0	0	0	0	0	0	55314000	0	0	0	0	0	0	0	0	0	0	0	47790000	0	0	0
AT3G61140.1	37756000	0	0	0	0	0	0	15225000	27378000	0	0	0	6424600	0	4403600	0	0	0	0	12139000	0	0	0	0
AT1G08480.1	0	0	0	0	0	0	0	0	0	0	0	0	103480000	0	0	0	0	0	0	0	0	0	0	0
AT5G57110.2;AT5G57110.1	0	30103000	36975000	0	0	0	0	0	0	0	0	0	0	0	37188000	0	0	0	0	0	0	0	0	0
AT4G29130.1;AT2G19860.2;AT1G47840.1	65115000	0	0	0	0	0	0	0	0	0	0	0	39298000	0	0	0	0	0	0	0	0	0	0	0
AT2G02560.2;AT2G02560.1	31353000	0	0	0	0	0	19621000	0	0	0	0	0	32904000	0	21842000	0	0	0	0	0	0	0	0	0
AT1G54270.1;AT1G54270.2	43770000	0	0	0	0	0	0	0	21710000	0	0	0	41207000	0	0	0	0	0	0	0	0	0	0	0
AT5G64120.1	36780000	0	0	0	0	0	36428000	0	34032000	0	0	0	0	0	0	0	0	0	0	0	0	0	0	0
AT3G51010.1	0	0	0	0	0	0	0	0	0	108440000	0	0	0	0	0	0	0	0	0	0	0	0	0	0
AT4G34620.1	0	0	0	0	0	0	0	33272000	47715000	0	0	0	0	0	0	0	0	0	0	27710000	0	0	0	0
AT4G32285.2;AT4G32285.1;AT2G25430.1	0	0	0	0	65275000	0	0	0	0	0	0	0	0	0	0	0	43572000	0	0	0	0	0	0	0
AT2G32080.2;AT2G32080.1	48047000	0	0	0	0	0	0	0	0	0	0	0	61435000	0	0	0	0	0	0	0	0	0	0	0
AT1G63770.4;AT1G63770.1;AT1G63770.2;AT1G63770.3;AT1G63770.5	24894000	0	0	0	0	0	0	0	26399000	0	0	0	24254000	0	0	0	0	0	0	0	0	0	0	34638000
AT5G17870.1	0	0	0	0	0	0	0	0	110200000	0	0	0	0	0	0	0	0	0	0	0	0	0	0	0
ATMG01190.1	0	0	0	0	0	0	0	0	0	0	0	0	0	0	0	0	0	0	0	0	110560000	0	0	0
AT2G43910.1;AT2G43910.2;AT2G43910.3	59773000	0	0	0	0	0	0	0	0	0	33789000	0	0	0	0	0	0	0	0	17157000	0	0	0	0
AT1G71220.1;AT1G71220.2	0	0	0	0	0	0	62333000	0	0	0	0	0	49432000	0	0	0	0	0	0	0	0	0	0	0
AT3G19390.1	36200000	0	0	0	0	0	36614000	0	0	0	0	0	39282000	0	0	0	0	0	0	0	0	0	0	0
AT2G20360.1	0	0	0	0	0	0	0	0	0	0	0	0	0	0	0	0	0	0	32195000	81063000	0	0	0	0
AT5G09590.1	40472000	0	0	0	0	0	0	0	0	0	0	0	32370000	0	40750000	0	0	0	0	0	0	0	0	0
AT1G52360.1;AT1G52360.2;AT3G15980.1;AT3G15980.4;AT3G15980.3;AT3G15980.2;AT3G15980.5	28841000	0	0	0	0	0	9085700	0	0	0	0	0	32420000	0	43728000	0	0	0	0	0	0	0	0	0
AT4G33510.1;AT4G33510.2	35629000	0	0	0	0	0	0	0	0	0	0	0	78850000	0	0	0	0	0	0	0	0	0	0	0
AT3G62360.1	40784000	0	0	0	0	0	19081000	0	0	0	0	0	47622000	0	0	0	0	0	7248000	0	0	0	0	0
AT3G28715.1;AT3G28715.2	0	0	0	0	0	0	0	0	0	0	0	0	0	0	0	0	0	0	0	0	0	0	115020000	0
AT1G60710.1	30271000	0	0	0	0	0	0	30695000	30724000	0	0	0	23940000	0	0	0	0	0	0	0	0	0	0	0
AT3G13470.1	0	0	26758000	0	0	0	0	0	24802000	0	0	0	64189000	0	0	0	0	0	0	0	0	0	0	0
AT1G74050.1	0	0	0	0	116940000	0	0	0	0	0	0	0	0	0	0	0	0	0	0	0	0	0	0	0
AT1G54100.2;AT1G54100.1	0	0	0	0	0	0	0	0	28021000	0	0	0	58519000	0	8230200	0	0	0	0	22497000	0	0	0	0
AT4G37870.1;AT5G65690.1	26107000	0	0	0	0	0	0	0	60521000	0	0	0	20394000	0	0	0	0	0	0	0	0	0	10321000	0
AT2G25450.1	80861000	0	0	0	0	0	0	0	0	0	0	0	37304000	0	0	0	0	0	0	0	0	0	0	0
AT1G61790.1	33607000	24120000	0	0	0	0	0	0	24651000	0	0	0	36615000	0	0	0	0	0	0	0	0	0	0	0
AT5G65720.1;AT5G65720.2	52185000	0	0	0	0	0	0	0	0	0	0	0	67092000	0	0	0	0	0	0	0	0	0	0	0
AT3G52590.1;AT2G36170.1	0	0	0	0	0	0	0	0	0	0	0	119760000	0	0	0	0	0	0	0	0	0	0	0	0
AT1G52980.1	0	0	0	0	0	0	0	0	0	0	47080000	0	0	0	0	0	0	0	0	0	0	0	73020000	0
AT4G02450.2;AT4G02450.1	32949000	0	0	0	0	0	0	0	39369000	0	27108000	0	0	0	22214000	0	0	0	0	0	0	0	0	0
AT4G35790.3;AT4G35790.2;AT4G35790.1	17409000	0	0	0	0	0	42031000	18807000	23831000	0	0	0	19974000	0	0	0	0	0	0	0	0	0	0	0
AT3G58660.1	0	0	0	0	0	0	0	0	0	0	37539000	0	0	0	0	0	0	0	0	0	0	0	85329000	0
AT2G22250.1;AT2G22250.3;AT2G22250.2	36262000	26870000	0	0	0	0	24952000	0	0	0	0	0	35802000	0	0	0	0	0	0	0	0	0	0	0
AT4G14110.1	46327000	0	0	0	0	0	32876000	28868000	0	0	0	0	16609000	0	0	0	0	0	0	0	0	0	0	0
AT5G59880.2;AT5G59880.1	45773000	0	0	0	0	0	20252000	0	48204000	0	0	0	0	0	11106000	0	0	0	0	0	0	0	0	0
AT1G07810.1;AT1G07670.1	41518000	0	0	0	0	0	13090000	0	11810000	0	0	0	25794000	13003000	12865000	0	0	0	0	0	0	0	9241400	0
AT1G47600.2;AT1G47600.1;AT1G51490.1	67785000	0	0	0	0	0	0	0	0	0	0	0	59540000	0	0	0	0	0	0	0	0	0	0	0
AT5G12470.1	46006000	0	0	0	0	0	0	0	21573000	0	0	0	60291000	0	0	0	0	0	0	0	0	0	0	0
AT5G58070.1	11606000	0	0	0	0	0	18286000	0	71928000	0	21009000	0	5788200	0	0	0	0	0	0	0	0	0	0	0
AT4G00585.1	35995000	0	0	0	0	0	0	0	0	0	0	0	55446000	0	0	0	0	0	0	37662000	0	0	0	0
AT2G24180.1	28730000	0	0	0	0	0	0	0	18759000	0	0	0	34476000	0	41365000	0	0	0	0	7957100	0	0	0	0
AT5G40760.1	39679000	0	0	0	0	0	28266000	23111000	18218000	0	0	0	22414000	0	0	0	0	0	0	0	0	0	0	0
AT1G50500.1;AT1G50500.2	30327000	0	0	0	0	0	44329000	0	0	0	0	0	57163000	0	0	0	0	0	0	0	0	0	0	0
AT5G51310.1	0	0	0	0	0	0	0	0	0	0	0	0	0	0	0	0	0	0	0	132050000	0	0	0	0
AT2G29560.1	23956000	0	0	0	0	0	0	0	0	0	0	0	41458000	26587000	0	0	0	0	40415000	0	0	0	0	0
AT5G08300.1;AT5G23250.2;AT5G23250.1	0	0	0	0	0	0	0	0	0	0	0	0	0	0	0	0	0	0	22046000	55412000	54993000	0	0	0
AT5G62530.1	80870000	0	0	0	0	0	0	0	22336000	0	0	0	12654000	0	3366500	0	0	0	15866000	0	0	0	0	0
AT3G03600.1	0	52230000	0	0	0	0	0	0	22439000	0	0	0	0	0	26580000	0	0	0	0	0	0	0	33931000	0
AT3G48209.1	0	0	0	0	0	135310000	0	0	0	0	0	0	0	0	0	0	0	0	0	0	0	0	0	0
AT1G75990.1	0	0	0	0	0	0	29464000	16894000	0	0	0	0	0	21183000	0	0	0	0	18168000	50805000	0	0	0	0
AT1G74040.1;AT1G18500.1	21681000	0	0	0	0	0	19650000	0	0	0	0	0	42517000	0	53117000	0	0	0	0	0	0	0	0	0
AT4G34180.1	31701000	0	0	0	0	0	0	0	45131000	0	0	0	42855000	0	18350000	0	0	0	0	0	0	0	0	0
AT1G20440.1	0	0	85513000	0	0	0	0	0	0	0	53463000	0	0	0	0	0	0	0	0	0	0	0	0	0
AT5G66510.1;AT5G66510.2;AT1G19580.2;AT1G19580.1	0	0	0	0	0	0	0	0	10203000	0	0	0	27840000	0	0	0	0	0	0	101830000	0	0	0	0
AT5G57460.1	16629000	0	0	0	0	0	32127000	24701000	0	0	0	0	22218000	15362000	0	0	0	0	0	28891000	0	0	0	0
AT1G07140.1	0	74442000	0	0	0	0	0	0	0	0	0	0	66193000	0	0	0	0	0	0	0	0	0	0	0
AT2G45540.1;AT2G45540.2	0	0	0	0	0	0	57892000	0	0	0	0	0	40487000	42670000	0	0	0	0	0	0	0	0	0	0
AT4G10320.1	76129000	0	0	0	0	0	0	0	0	0	0	0	64959000	0	0	0	0	0	0	0	0	0	0	0
AT4G04840.1	0	0	0	141520000	0	0	0	0	0	0	0	0	0	0	0	0	0	0	0	0	0	0	0	0
AT4G23690.1;AT1G64160.1	57181000	0	0	0	0	0	0	0	0	0	0	0	84363000	0	0	0	0	0	0	0	0	0	0	0
AT5G48990.1;AT5G48980.1	0	0	0	0	141730000	0	0	0	0	0	0	0	0	0	0	0	0	0	0	0	0	0	0	0
AT2G43750.2;AT2G43750.1	27363000	0	0	0	0	0	0	0	0	0	0	0	29792000	0	47234000	0	0	0	0	0	0	0	38042000	0
AT3G06040.3;AT3G06040.2;AT3G06040.1	0	0	0	0	0	0	0	0	0	0	0	0	0	0	142520000	0	0	0	0	0	0	0	0	0
AT1G48900.1;AT1G48900.2;AT5G49500.1;AT1G15310.1	22233000	0	0	0	0	0	33423000	0	0	0	0	0	33938000	0	0	0	0	0	53230000	0	0	0	0	0
AT3G27890.1	0	0	0	0	0	0	0	0	0	0	0	0	0	0	0	0	0	0	77837000	66601000	0	0	0	0
AT1G80750.1	0	0	0	0	0	0	0	0	0	0	58871000	0	0	0	0	0	0	0	0	0	0	0	85997000	0
AT5G47190.1	0	0	70362000	0	0	0	0	0	75759000	0	0	0	0	0	0	0	0	0	0	0	0	0	0	0
AT5G25250.1;AT5G64870.1	0	0	0	0	0	0	0	0	103080000	0	43112000	0	0	0	0	0	0	0	0	0	0	0	0	0
AT1G32990.1	0	0	63221000	0	0	0	0	0	84135000	0	0	0	0	0	0	0	0	0	0	0	0	0	0	0
CON__ENSEMBL:ENSBTAP00000007350;CON__P01030	0	0	0	0	0	0	0	0	0	0	73203000	0	0	0	0	0	0	0	0	0	0	0	74341000	0
CON_P02538;CON__P02538;CON__Q8VED5;CON_P05787;CON_Q6GMY0;CON_Q6DHW5;CON_Q53GJ0;CON__P05787	0	147920000	0	0	0	0	0	0	0	0	0	0	0	0	0	0	0	0	0	0	0	0	0	0
AT3G52580.1	0	0	0	0	0	151800000	0	0	0	0	0	0	0	0	0	0	0	0	0	0	0	0	0	0
AT4G35490.1	0	0	46917000	0	0	0	0	0	50028000	0	0	0	0	0	0	55939000	0	0	0	0	0	0	0	0
AT3G52500.1	0	0	0	0	0	0	42389000	19965000	15782000	0	0	0	18601000	14485000	0	0	0	0	23198000	21051000	0	0	0	0
AT5G35910.1	0	0	156890000	0	0	0	0	0	0	0	0	0	0	0	0	0	0	0	0	0	0	0	0	0
AT3G48750.1;AT5G01850.1;AT5G50180.1;AT1G66750.1;AT5G40540.1;AT3G27560.1;AT3G50720.1;AT1G18040.1;AT1G73690.1;AT5G66710.1;AT5G64960.2;AT5G10270.1;AT4G23230.1;AT1G52290.1;AT5G64960.1	64719000	0	0	0	0	0	0	0	0	0	0	0	53195000	0	39184000	0	0	0	0	0	0	0	0	0
AT2G18980.1	0	0	0	0	0	0	0	0	0	0	0	0	52440000	70972000	36146000	0	0	0	0	0	0	0	0	0
AT3G27240.1;AT5G40810.2;AT5G40810.1	43871000	36779000	0	0	0	0	0	0	0	0	0	0	35068000	0	0	0	0	0	0	44063000	0	0	0	0
AT1G75350.1	0	0	0	0	0	0	0	0	44075000	0	0	0	0	0	0	0	0	0	0	0	115840000	0	0	0
AT3G55360.1	0	0	0	0	0	0	0	0	0	0	0	0	135080000	24912000	0	0	0	0	0	1841200	0	0	0	0
AT1G01050.1;AT4G01480.1	0	0	0	0	0	0	0	28406000	0	0	0	0	24742000	28986000	0	0	0	0	27508000	0	52251000	0	0	0
AT4G29220.1	62732000	0	0	0	0	0	0	0	0	0	0	0	99740000	0	0	0	0	0	0	0	0	0	0	0
AT3G56090.1	0	0	0	0	0	0	0	0	0	0	0	0	164340000	0	0	0	0	0	0	0	0	0	0	0
AT4G30010.1	26847000	0	0	0	0	0	0	10307000	37590000	0	0	0	37914000	0	51721000	0	0	0	0	0	0	0	0	0
AT1G08410.1;AT2G27200.1	0	0	0	0	0	0	0	0	0	0	0	0	0	0	0	0	0	0	0	0	0	50678000	115810000	0
AT4G36430.1;AT2G35380.1;AT1G44970.1;AT4G16270.1	31323000	0	0	0	0	0	36013000	27757000	27027000	0	0	0	17042000	0	0	0	0	0	27667000	0	0	0	0	0
AT5G61780.1	43196000	60632000	0	0	0	0	0	0	28730000	0	0	0	5671400	0	33567000	0	0	0	0	0	0	0	0	0
AT4G01850.2;AT4G01850.1	53209000	0	0	0	0	0	0	0	0	0	0	0	35121000	0	84815000	0	0	0	0	0	0	0	0	0
AT2G40890.1	86293000	0	0	0	0	0	0	0	0	0	0	0	60151000	0	30788000	0	0	0	0	0	0	0	0	0
AT4G29350.1	35092000	0	0	0	0	0	21893000	0	33492000	0	19106000	0	33620000	0	34502000	0	0	0	0	0	0	0	0	0
AT5G47210.3;AT5G47210.1;AT5G47210.2	32065000	58829000	87668000	0	0	0	0	0	0	0	0	0	0	0	0	0	0	0	0	0	0	0	0	0
AT5G62270.2;AT5G62270.1	0	0	0	0	26724000	0	0	0	39186000	0	0	0	0	53454000	27549000	0	32703000	0	0	0	0	0	0	0
AT4G01100.1;AT4G01100.2	42152000	0	0	0	0	0	0	0	0	0	0	0	40478000	0	0	0	0	0	53911000	43580000	0	0	0	0
AT4G05020.1;AT4G05020.2	36366000	25272000	0	0	0	0	27918000	0	15854000	0	0	0	45636000	17199000	0	0	0	0	12250000	0	0	0	0	0
AT3G08590.2;AT3G08590.1	40453000	0	0	0	0	0	0	0	0	0	0	0	43328000	0	42025000	0	0	0	0	0	0	0	57039000	0
AT1G35160.1;AT1G35160.2	48122000	24132000	0	0	0	0	31312000	0	0	0	0	0	18903000	0	16727000	0	0	0	0	0	0	0	44074000	0
ATCG00500.1	32894000	0	0	0	0	0	45147000	0	0	0	0	0	38419000	0	0	0	0	0	48904000	21721000	0	0	0	0
AT4G19880.1;AT4G19880.2;AT4G19880.3;AT5G45020.2;AT5G45020.1;AT5G44990.3;AT5G44990.2;AT5G44990.1	0	0	0	0	0	0	0	0	0	0	0	0	22908000	0	119680000	0	0	0	0	0	0	0	46337000	0
AT1G09210.1	34113000	0	0	0	0	0	0	24081000	0	0	0	0	16997000	0	32969000	0	0	0	54580000	26416000	0	0	0	0
AT2G42910.1	93904000	0	0	0	0	0	0	0	25247000	0	0	0	61633000	0	0	0	0	0	8445800	0	0	0	0	0
AT3G49080.1	0	52630000	0	0	0	0	0	41874000	0	0	0	0	0	47693000	16554000	0	0	0	0	0	16587000	0	22283000	0
AT1G29900.1	25515000	0	0	0	0	0	31451000	0	21087000	0	0	0	32441000	0	27253000	0	0	0	37908000	23791000	0	0	0	0
AT2G42310.1	0	0	0	0	0	0	0	0	0	0	0	0	0	0	0	0	0	0	156110000	0	46187000	0	0	0
AT5G66420.2;AT5G66420.1	111260000	0	0	0	0	0	0	0	0	0	0	0	43639000	0	30717000	0	0	0	0	19388000	0	0	0	0
AT5G39600.1	0	0	63144000	0	0	0	0	0	0	0	0	0	0	0	38128000	50418000	0	0	0	0	0	0	53841000	0
AT1G48090.1	0	0	0	0	0	0	44642000	65950000	0	0	0	0	0	0	26458000	0	0	0	71516000	0	0	0	0	0
AT3G12780.1	30513000	0	0	0	0	0	31083000	0	31709000	0	0	0	28473000	32794000	54736000	0	0	0	0	0	0	0	0	0
AT3G07770.1	76362000	0	0	0	0	0	24670000	0	0	0	0	0	65731000	0	42895000	0	0	0	0	0	0	0	0	0
AT1G20260.1	0	0	0	0	0	0	0	0	26297000	0	0	0	81287000	0	0	0	0	0	64647000	37907000	0	0	0	0
AT3G50820.1;AT5G66570.1	0	0	0	0	0	145200000	64953000	0	0	0	0	0	0	0	0	0	0	0	0	0	0	0	0	0
AT3G19450.1	46303000	0	0	0	0	0	31449000	0	0	0	0	0	54366000	0	57228000	0	0	0	0	23839000	0	0	0	0
AT1G52400.3;AT1G52400.1;AT1G52400.2	0	0	0	0	0	0	0	0	0	0	0	0	18637000	0	0	0	0	0	0	73807000	126820000	0	0	0
AT3G56310.1;AT3G56310.2	63503000	37275000	0	0	0	0	0	0	0	0	0	0	71004000	0	50623000	0	0	0	0	0	0	0	0	0
AT3G44100.1	79786000	0	0	0	0	0	53294000	0	0	0	0	0	67634000	0	23039000	0	0	0	0	0	0	0	0	0
AT5G12940.1	53194000	0	0	0	0	0	46574000	0	43510000	0	0	0	36236000	0	44240000	0	0	0	0	0	0	0	0	0
AT3G54470.1	37658000	0	0	0	0	0	34009000	0	0	0	0	0	51509000	30275000	39813000	0	0	0	0	32241000	0	0	0	0
AT2G27730.1	31793000	0	0	0	0	0	38601000	0	18635000	0	0	0	50447000	0	0	0	0	0	30748000	60198000	0	0	0	0
AT1G19520.1;AT1G19520.2	0	70977000	0	0	0	0	0	0	37201000	0	0	0	0	69007000	55430000	0	0	0	0	0	0	0	0	0
AT1G24360.1	82805000	0	0	0	0	0	0	0	0	0	0	0	72560000	0	80790000	0	0	0	0	0	0	0	0	0
AT2G15430.1	40010000	33045000	32988000	0	0	0	0	0	0	0	0	0	53762000	37360000	39031000	0	0	0	0	0	0	0	0	0
AT2G34970.1	0	0	35991000	0	0	0	55335000	43239000	29666000	0	0	0	38332000	0	0	0	0	0	0	33738000	0	0	0	0
AT1G09430.1;AT1G60810.1;AT1G10670.3	48752000	36392000	0	0	0	0	19155000	0	34253000	0	0	0	72866000	27279000	0	0	0	0	0	0	0	0	0	0
AT5G04990.1	0	0	0	0	0	0	0	51623000	23929000	0	0	0	0	0	0	0	0	0	97558000	65944000	0	0	0	0
AT1G27435.1	0	0	56003000	0	0	0	0	0	97110000	0	0	0	0	0	32252000	0	35149000	0	0	0	0	0	21356000	0
ATMG00210.1;AT2G07725.1	0	0	0	0	0	0	0	0	55074000	79900000	0	0	0	0	55739000	0	0	0	0	0	0	0	51857000	0
AT3G18410.2;AT3G18410.1;AT1G49140.1	0	0	0	0	0	0	94273000	0	0	0	0	0	148310000	0	0	0	0	0	0	0	0	0	0	0
AT1G80360.1	78774000	55829000	0	0	0	0	45625000	0	0	0	0	0	62390000	0	0	0	0	0	0	0	0	0	0	0
AT4G39730.1	0	33103000	28992000	0	0	0	20249000	0	52931000	0	37003000	0	14145000	0	59136000	0	0	0	0	0	0	0	0	0
AT3G16150.1	0	0	0	0	245720000	0	0	0	0	0	0	0	0	0	0	0	0	0	0	0	0	0	0	0
AT1G26750.1	0	56842000	0	0	0	0	0	29929000	32055000	0	42263000	0	0	54171000	30866000	0	0	0	0	0	0	0	0	0
AT5G22330.1	0	0	0	0	0	0	0	0	0	0	0	0	0	0	0	0	0	0	248280000	0	0	0	0	0
AT3G61820.1	69098000	0	0	0	0	0	76418000	0	58092000	0	0	0	50632000	0	0	0	0	0	0	0	0	0	0	0
AT3G04720.1	0	0	0	0	0	0	0	0	0	0	0	0	0	0	0	0	0	0	0	107490000	111620000	0	37699000	0
AT5G59613.2;AT5G59613.1;AT3G46430.1	0	0	0	0	0	0	0	26568000	0	0	0	0	0	0	0	0	0	0	165350000	66139000	0	0	0	0
AT4G00230.1	0	49925000	52073000	0	0	0	0	0	0	0	0	0	37854000	51829000	67860000	0	0	0	0	0	0	0	0	0
AT2G37600.2;AT2G37600.1	0	0	0	0	0	0	0	0	0	0	0	94861000	0	0	0	0	0	75155000	0	0	0	0	0	91502000
AT2G42210.4;AT2G42210.3;AT2G42210.1;AT2G42210.2	73418000	42301000	0	0	0	0	53024000	0	0	0	0	0	92870000	0	0	0	0	0	0	0	0	0	0	0
AT3G14310.1;AT1G53830.1	18502000	0	0	0	0	0	0	0	44844000	0	42698000	0	20277000	31366000	28501000	0	0	0	26051000	50339000	0	0	0	0
AT5G46160.2;AT5G46160.1	0	0	47615000	0	0	0	0	0	72660000	0	0	0	0	0	58993000	0	0	0	0	0	0	83346000	0	0
AT5G52920.1	66123000	0	49041000	0	0	0	0	0	0	0	0	0	69804000	0	77749000	0	0	0	0	0	0	0	0	0
AT4G38220.1;AT4G38220.2	48784000	0	0	0	0	0	49278000	0	40468000	0	0	0	41967000	0	0	0	36165000	0	0	0	0	0	46359000	0
AT3G07050.1	0	0	0	0	0	0	0	0	0	0	118570000	0	0	0	0	0	0	0	0	0	0	0	146390000	0
CON__ENSEMBL:ENSBTAP00000031360	33594000	66696000	0	0	0	80850000	0	0	0	0	85287000	0	0	0	0	0	0	0	0	0	0	0	0	0
AT4G28470.1	68779000	0	0	0	0	0	56148000	0	60224000	0	0	0	82239000	0	0	0	0	0	0	0	0	0	0	0
AT4G16260.1	39165000	0	0	0	0	0	0	0	0	0	0	0	76215000	0	83928000	0	0	0	0	71791000	0	0	0	0
AT2G45470.1	61323000	0	37732000	0	0	0	38292000	22329000	48406000	0	29035000	0	34969000	0	0	0	0	0	0	0	0	0	0	0
AT1G07320.4;AT1G07320.3;AT1G07320.2;AT1G07320.1	0	0	0	0	0	0	0	0	89867000	0	0	0	0	0	0	0	0	0	0	0	183370000	0	0	0
ATCG00770.1	20975000	39339000	0	0	0	0	0	31580000	58486000	0	0	0	19644000	11995000	10447000	0	0	0	29468000	32222000	0	0	20119000	0
AT1G64880.1	0	54763000	56297000	0	0	0	0	0	87080000	0	0	0	0	0	77026000	0	0	0	0	0	0	0	0	0
AT1G20010.1;CON__ENSEMBL:ENSBTAP00000025008	56644000	52707000	0	0	0	0	58255000	20031000	0	0	0	0	32419000	56287000	0	0	0	0	0	0	0	0	0	0
AT5G57655.2;AT5G57655.1	39927000	0	0	0	0	0	0	0	35819000	0	0	0	47945000	30650000	43007000	0	37180000	0	0	20201000	0	0	0	24364000
AT1G79920.2;AT1G79920.1;AT1G79930.2;AT1G79930.1	67268000	0	31640000	0	0	0	0	0	32866000	0	24760000	0	67665000	0	24507000	0	0	0	0	30974000	0	0	0	0
AT5G06360.1	0	0	0	82629000	0	0	0	0	0	0	50077000	0	0	0	0	0	51309000	0	0	0	0	0	99519000	0
AT2G44620.1	19644000	0	0	0	0	0	55975000	35750000	0	0	0	0	29950000	0	0	0	0	0	33252000	102400000	0	0	7889500	0
AT1G67350.2;AT1G67350.1	0	0	0	0	0	0	29548000	29761000	0	0	0	0	64945000	26329000	0	0	0	0	94540000	42984000	0	0	0	0
AT2G44350.1;AT2G44350.2;AT3G60100.1	64947000	0	0	0	0	0	0	0	41480000	0	0	0	60610000	30613000	49940000	0	0	0	0	0	0	0	45223000	0
ATCG01310.1;ATCG00830.1	0	0	101740000	0	0	0	0	0	97236000	99438000	0	0	0	0	0	0	0	0	0	0	0	0	0	0
AT2G24500.1	0	0	0	86292000	0	0	0	0	0	96684000	116720000	0	0	0	0	0	0	0	0	0	0	0	0	0
AT3G56240.1	41892000	31569000	0	0	0	0	36094000	41828000	58924000	0	0	0	37938000	0	18046000	0	0	0	38508000	0	0	0	0	0
AT3G23620.1	0	0	0	52477000	0	0	0	0	0	0	80886000	0	0	0	0	0	31205000	0	0	0	0	40293000	100040000	0
AT3G61440.3;AT3G61440.2;AT3G61440.1	46330000	0	0	0	0	0	0	35955000	36660000	0	0	0	33189000	28582000	0	0	0	0	40061000	55797000	28434000	0	0	0
AT3G28200.1	70750000	0	0	0	0	0	42491000	24733000	23392000	0	0	0	90962000	25521000	21583000	0	0	0	6670000	0	0	0	0	0
AT1G07830.1	0	0	150430000	0	0	0	0	0	0	0	38448000	0	0	0	72464000	47807000	0	0	0	0	0	0	0	0
AT3G18130.1	76413000	0	0	0	0	0	0	0	141740000	0	91399000	0	0	0	0	0	0	0	0	0	0	0	0	0
AT1G80460.2;AT1G80460.1	63807000	0	0	0	0	0	42274000	0	44455000	0	0	0	95382000	69055000	0	0	0	0	0	0	0	0	0	0
AT3G06700.3;AT3G06700.2;AT3G06700.1;AT3G06680.3;AT3G06680.2;AT3G06680.1	0	0	0	46261000	45569000	0	0	0	0	0	0	166200000	0	0	0	0	0	49204000	0	0	0	13278000	0	0
AT2G46280.2;AT2G46280.1;AT2G46280.3;AT2G46290.1	49648000	0	38353000	0	0	0	28853000	0	50147000	0	0	0	39567000	0	28853000	0	0	0	25659000	13387000	0	0	47156000	0
AT5G10860.1	57167000	0	0	0	0	0	21391000	0	34843000	0	0	0	56083000	36521000	104670000	0	0	0	0	13590000	0	0	0	0
AT1G27450.2;AT1G27450.1;AT1G27450.3	57205000	0	0	0	0	0	29360000	38905000	44498000	0	26410000	0	58162000	17436000	35622000	0	0	0	0	17766000	0	0	0	0
AT3G63460.1;AT3G63460.3;AT3G63460.2	52832000	28244000	36617000	0	0	0	26762000	0	25176000	0	0	0	100650000	0	55486000	0	0	0	0	0	0	0	0	0
AT3G06580.1	58868000	35887000	40680000	0	0	0	38702000	0	0	0	0	0	48802000	56407000	53863000	0	0	0	0	0	0	0	0	0
AT3G53990.1;AT3G53990.2	44788000	35079000	44319000	0	0	0	0	0	49631000	0	47693000	0	48654000	0	63658000	0	0	0	0	0	0	0	0	0
AT5G19485.1	23940000	0	0	0	0	0	49059000	57908000	25480000	0	0	0	21741000	0	0	0	0	0	64498000	54299000	38875000	0	0	0
AT4G31990.4;AT4G31990.2;AT4G31990.1;AT4G31990.3	60570000	0	0	0	0	0	0	0	46560000	0	50481000	0	34715000	0	63399000	27697000	0	0	0	0	0	0	65734000	0
AT3G20260.1	0	0	0	0	350940000	0	0	0	0	0	0	0	0	0	0	0	0	0	0	0	0	0	0	0
AT5G17380.1	62800000	0	0	0	0	0	0	28609000	0	0	0	0	80943000	45314000	0	0	0	0	92344000	41078000	0	0	0	0
AT1G80070.1;AT4G38780.1	40275000	0	52712000	0	0	0	65108000	40948000	36724000	0	0	0	18651000	41576000	0	0	0	0	57443000	0	0	0	0	0
AT3G11630.1	60293000	0	0	0	0	0	0	48799000	44399000	0	0	0	58089000	52606000	0	0	0	0	0	0	89301000	0	0	0
AT4G16143.2;AT4G16143.1;AT4G02150.1;AT3G06720.2;AT3G06720.1	41577000	0	0	0	0	0	41112000	40388000	0	0	0	0	29209000	36030000	41336000	0	40519000	0	61177000	0	22302000	0	0	0
AT1G07750.1;AT2G28680.1	32009000	0	0	0	0	0	49594000	37661000	48230000	0	34026000	0	18366000	24198000	0	0	0	0	32866000	44673000	0	0	37730000	0
AT1G24240.1;AT4G11630.1;AT5G11750.1	0	0	115500000	0	0	0	0	0	100110000	0	0	0	0	0	92293000	54415000	0	0	0	0	0	0	0	0
AT3G11710.1	81858000	66755000	38364000	0	0	0	27882000	0	0	0	0	0	57411000	51838000	40398000	0	0	0	0	0	0	0	0	0
AT2G21660.2;AT2G21660.1	0	0	28453000	0	0	0	29969000	56685000	64933000	0	0	0	4907000	0	0	0	0	0	24698000	63107000	0	0	93661000	0
AT4G20260.6;AT4G20260.5;AT4G20260.3;AT4G20260.2;AT4G20260.1;AT4G20260.4	39566000	21056000	0	0	0	0	30201000	36298000	58554000	44750000	0	0	59909000	20117000	42161000	0	0	0	0	19430000	0	0	0	0
AT5G40370.1;AT5G40370.2	27457000	0	0	0	0	0	35607000	46879000	28792000	0	0	0	23205000	30769000	22330000	0	0	0	99896000	64130000	0	0	0	0
AT1G10840.1;AT1G10840.2	50600000	39145000	0	0	0	0	93418000	0	42758000	0	0	0	56290000	0	45011000	0	0	0	18880000	0	0	0	33057000	0
AT4G31500.1	68601000	0	43323000	0	0	0	21190000	0	16349000	0	0	0	114810000	13052000	103950000	0	0	0	0	0	0	0	0	0
AT5G43350.1;AT5G43370.2;AT5G43370.1	42199000	44944000	0	0	0	0	21719000	17833000	21258000	0	0	0	92902000	35434000	79878000	0	0	0	0	0	0	0	25272000	0
AT2G16060.1	0	0	0	0	0	0	101210000	48957000	110730000	0	42553000	0	25966000	41866000	11009000	0	0	0	0	0	0	0	0	0
AT5G15650.1	133300000	0	0	0	0	0	98758000	0	0	0	0	0	99577000	38997000	0	0	0	0	13423000	0	0	0	0	0
AT1G20950.1	158060000	45710000	50103000	0	0	0	25384000	0	0	0	0	0	80124000	24865000	0	0	0	0	0	0	0	0	0	0
AT1G16870.1	0	98271000	0	0	0	0	0	40975000	82481000	0	0	0	0	60742000	53744000	0	0	0	0	24605000	24804000	0	0	0
AT3G15950.2;AT3G15950.1	49888000	0	0	0	0	0	0	0	55535000	0	39126000	0	39782000	0	53358000	0	0	0	61420000	61333000	0	0	27657000	0
AT4G25740.1;AT4G25740.2	0	0	0	0	0	0	0	55085000	0	0	0	0	0	101950000	0	0	55402000	0	0	106860000	0	0	0	69262000
AT5G63680.1	88213000	37652000	0	0	0	0	71071000	0	0	0	0	0	107680000	0	42822000	0	41605000	0	0	0	0	0	0	0
[truncated: 666 more rows]

## Sheet: A4 (Treatments_2)
ID	Genotype	Organ	Temperature	Subunit	Code
[truncated: 24 more rows]

[truncated: 15 more sheets: B (ATGs and Identifiers), C1 (LSU_1), C2 (LSU_2), C3 (SSU_1), C4 (SSU_2), D (Norm_Factor), E1 (Norm_LSU1), E2 (Norm_LSU2), E3 (Norm_SSU1), E4 (Norm_SSU2), F (Common_ATGs), G (Normalized_Full_Mat), H (Column_Names), I (Normalized_Full_Mat_Named), J (Master table)]
