# Supplementary material for: Spatially Enriched Paralog Rearrangements Argue Functionally Diverse Ribosomes Arise during Cold Acclimation in Arabidopsis
Source: Int J Mol Sci. 2021 Jun 7;22(11):6160. doi: 10.3390/ijms22116160 (PMC8201131; doi:10.3390/ijms22116160)
Supplement: Supplementary file 1 [file ijms-22-06160-s001.zip › Table S4.xlsx]

## Sheet: Legend
Table S4. RP paralog accumulation in polysomes compared to the non-translating LSU subunit fractions across multiple sample types. Normalized protein abundances (Table S3) were used to calculate Ln-transformed ratios between the 60S and the polysome fractions. Ratios were genotype and temperature-specific. Highest and lowest fold changes in RPs have been compiled for the WT (A tabs) and dkos (B t…
high increase (Ln-ratios < 2.0 and > 1.0)	dark-purple
increase (Ln-ratios > 0.0 and ≤ 1.0)	purple
decrease (Ln-ratios ≥ -1.0 and < 0.0)	yellow
high decrease (Ln-ratios between > -2.0 and < -1.0)	orange
inversely accumulated paralogs within RP families	black
no change	off-white

## Sheet: A1 (Sub-stoichiometry WT)
Log2(60S/Polysome at 20°C)
P1.P2_RPP1A
eS30_RPS30A, B or C
eS1_RPS3aB
uS5_RPS2C
uL11_RPL12C
eS12_RPS12A
uL6_RPL9D
eS1_RPS3aA
eL27_RPL27A or B
eL33_RPL35aB
eS21_RPS21C
eL36_RPL36C
eL18_RPL18C
eS19_RPS19A
eL32_RPL32A
uL15_RPL27aC
eL14_RPL14B
RACK1_RACK1A
uL16_RPL10A
uS12_RPS23A or B
eS19_RPS19C
Log2(60S/Polysome) at 10°C
eS1_RPS3aB
eL28_RPL28C
eL34_RPL34B
eL22_RPL22B
eS12_RPS12C
eL13_RPL13D
eS6_RPS6B
eL32_RPL32B
uL3_RPL3A
uL13_RPL13aA
uL6_RPL9B or C
uS3_RPS3A
uS3_RPS3B
P1.P2_RPP2B
eS21_RPS21C
uL10_RPP0A or B
uL30_RPL7C
P1.P2_RPP1C
RACK1_RACK1A
P1.P2_RPP1B
P1.P2_RPP2A

## Sheet: A2 (WT_Ln_60S_Polysome_10C)
RPs	Cold	Cold.1	Cold.2	colMeans(t(clean_ratio_mat[, grep(\Cold\", x = colnames(clean_ratio_mat))]))"	colStdevs(t(clean_ratio_mat[, grep(\Cold\", x = colnames(clean_ratio_mat))]))"
P1.P2_RPP2A.1.AT2G27720.3.AT2G27720.2	0.0197975	-0.429443	2.51368	1.54196	1.89472
P1.P2_RPP1B.2.AT4G00810.1	1.29142	0.231669	1.68429	1.23229	0.728446
RACK1_RACK1A.1	0.306538	1.20484	1.54985	1.14271	0.521796
P1.P2_RPP1C.2.AT5G47700.1	0.98355	0.206338	1.58685	1.07516	0.611402
uL30_RPL7C.1.AT2G44120.2	0.245178	1.76714	0.0538712	1.00397	0.996438
uL10_RPP0B.1.uL10_RPP0B.2.uL10_RPP0A.1	1.20481	0.406931	0.78271	0.850965	-0.0761553
eS21_RPS21C.1	1.39385	0.780329	-0.373784	0.833005	0.515355
P1.P2_RPP2B.3.AT2G27710.2.AT2G27710.1.AT2G27710.4	0.858208	0.0243309	1.1973	0.802705	0.138517
uS3_RPS3B.1	0.846737	0.923955	0.348094	0.736785	-0.527346
uS3_RPS3A.1	0.481069	0.838763	0.437717	0.602579	-0.860687
eL37_RPL37B.1eL37_RPL37C.1.eL37_RPL37A..1	0.591701	1.05817	-0.350518	0.586393	0.0847256
uS5_RPS2C.1	0.213095	0.799042	0.474213	0.524267	-0.696953
P1.P2_RPP1A.4.AT1G01100.2.AT1G01100.1.AT1G01100.3	0.869194	-0.175311	0.425865	0.460605	-0.255775
eS24_RPS24A.1	0.186656	0.89887	0.0277419	0.446856	-0.250017
uL13_RPL13aD.2.AT5G48760.1	0.486838	0.698118	0.0356592	0.443281	-0.712284
uS8_RPS15aF.1.uS8_RPS15aA.2.AT1G07770.1.uS8_RPS15aC.1	-0.371823	0.885524	0.425946	0.437129	-0.14212
eL14_RPL14B.1	0.379752	0.272353	0.436746	0.365253	-2.13104
uS12_RPS23B.1.uS12_RPS23A.1	0.856745	-1.06313	0.394327	0.332713	0.00794901
eL38_RPL38B.1.eL38_RPL38A.1	-0.483006	0.397805	0.703233	0.318636	-0.344604
eL32_RPL32A.1	-0.71869	0.924497	0.074061	0.308676	0.0450554
eL20_RPL18aB.1	-0.293307	0.454785	0.514733	0.286386	-0.674013
eL27_RPL27B.1.eL27_RPL27A.1	0.156682	0.308963	0.307593	0.260255	-2.20237
uS17_RPS11A.1	0.297623	0.657209	-0.497414	0.258293	-0.412219
eL18_RPL18C.1	0.0150188	0.0491345	0.587564	0.253374	-0.813975
uL30_RPL7B.1.AT2G01250.2	0.303171	0.178627	0.261252	0.249013	-2.52003
eS8_RPS8A.1.eS8_RPS8B.1	-0.588769	0.734058	0.124506	0.228759	-0.259009
eL6_RPL6A.1	0.314699	0.344058	-0.159542	0.191458	-1.16757
eL30_RPL30B.1	0.745528	-0.71685	-0.0200572	0.175628	-0.186136
uS13_RPS18C.1.uS13_RPS18B.1.uS13_RPS18A.1	0.578046	-0.53169	0.180426	0.173362	-0.514976
eL36_RPL36C.1	-0.2131	0.457344	0.104002	0.153451	-0.944277
uL1_RPL10aC.2.AT5G22440.1	-0.609166	0.339564	0.423042	0.146907	-0.624326
eS12_RPS12A.2.AT1G15930.1	-0.767249	0.363306	0.446644	0.144222	-0.508245
eS7_RPS7C.1	0.322003	-0.104683	0.087353	0.116829	-1.42171
eL8_RPL7aA.1	-0.0417913	0.499961	-0.323316	0.104802	-0.732535
eL20_RPL18aC.1	0.0308579	-0.41497	0.492251	0.103667	-0.708343
eL18_RPL18B.1.eL18_RPL18A.2.eL18_RPL18A.1	0.0872833	-2.06502	0.664403	0.0523874	-0.0955918
uL18_RPL5A.1.AT3G25520.2	-0.568538	0.102372	0.372641	0.0410497	-0.806835
uL15_RPL27aB.1	-0.174272	-0.879299	0.613568	0.0334841	-0.307323
uL1_RPL10aA.1	-0.452041	-0.811131	0.694075	0.0271417	-0.163404
uL1_RPL10aB.2.AT2G27530.1	-0.0773077	0.134761	0.00469218	0.0245532	-2.20081
uL24_RPL26A.1	0.0828021	0.161304	-0.269655	0.0083026	-1.53015
uL3_RPL3B.1	-0.0759738	-0.061668	0.146115	0.00808865	-2.04493
eL19_RPL19A.1	-0.81322	0.519243	-0.148695	-0.00467253	-0.463028
uL30_RPL7D.3.AT3G13580.2.AT3G13580.1	-0.318326	0.354412	-0.198164	-0.00905986	-0.970158
eL15_RPL15A.1.eL15_RPL15B.1	-0.104455	0.234176	-0.262228	-0.0222399	-1.36202
eS24_RPS24B.1	-0.378921	0.376966	-0.328829	-0.0470144	-0.828643
uL18_RPL5B.2.AT5G39740.1	-0.236274	0.0554357	-0.0837805	-0.0811383	-2.0119
eL14_RPL14A.1	-0.0771247	-0.0968907	-0.107934	-0.0939017	-4.25175
eL28_RPL28A.3.AT2G19730.2.AT2G19730.1	-0.767356	0.048459	0.18536	-0.0988839	-0.941304
eL8_RPL7aB.1	-0.617876	0.0750546	0.0713967	-0.108685	-1.17125
uL13_RPL13aB.1	-0.0815949	0.091359	-0.477033	-0.128618	-1.42573
uL6_RPL9C.1.uL6_RPL9B.1	-0.093162	-0.460633	0.046094	-0.147301	-1.54996
uL13_RPL13aA.1.AT3G07110.2	-0.159925	-0.0849922	-0.36023	-0.195106	-2.17676
uL3_RPL3A.9.AT1G43170.8.AT1G43170.7.AT1G43170.6.AT1G43170.5.AT1G43170.3.AT1G43170.2.AT1G43170.1.AT1G43170.4	-0.18943	-0.383004	-0.168788	-0.242527	-2.41382
eL32_RPL32B.2.AT5G46430.1	-0.550466	-0.0622055	-0.192006	-0.247747	-1.68419
eS6_RPS6B.1.AT5G10360.2	-0.499662	-0.0513899	-0.35967	-0.285661	-1.72734
eL13_RPL13D.1	-0.0343139	-1.07157	-0.223717	-0.352739	-1.13022
eS12_RPS12C.3.AT2G32060.2.AT2G32060.1	-0.72766	-0.332369	-0.10021	-0.35434	-1.55478
eL22_RPL22B.3.AT3G05560.2.AT3G05560.1	-1.15787	-0.274709	-0.0656696	-0.400284	-1.1373
eL34_RPL34B.1	-0.263503	-0.470874	-0.784956	-0.483994	-1.85619
eL28_RPL28C.2.AT4G29410.1	-1.36484	-0.81895	0.134371	-0.488775	-0.757917
eS1_RPS3aB.1	-1.79449	-0.905322	-0.424054	-0.895662	-1.41013

## Sheet: A3 (WT_Ln_60S_Polysome_20C)
RPs	Control	Control.1	colMeans(t(clean_ratio_mat[, grep(\Control\", x = colnames(clean_ratio_mat))]))"	colStdevs(t(clean_ratio_mat[, grep(\Control\", x = colnames(clean_ratio_mat))]))"
eS19_RPS19C.1	1.98474	0.194353	1.44594	1.45557
uS12_RPS23B.1.uS12_RPS23A.1	1.09666	0.871903	0.990585	-0.852903
uL16_RPL10A.1.AT1G14320.2	-0.938428	1.53508	0.922855	1.10045
RACK1_RACK1A.1	0.402892	1.21191	0.887075	0.276014
eL14_RPL14B.1	1.08116	0.235889	0.745296	0.173447
uL15_RPL27aC.1	0.080797	1.04739	0.676599	0.222171
eL32_RPL32A.1	1.13786	-0.435746	0.633098	0.558983
eS19_RPS19A.1	0.583629	0.645584	0.615086	-2.51315
eL18_RPL18C.1	0.884113	0.225915	0.608217	-0.191822
eL36_RPL36C.1	0.821521	0.265522	0.581676	-0.377195
uS8_RPS15aF.1.uS8_RPS15aA.2.AT1G07770.1.uS8_RPS15aC.1	-0.0236483	0.886165	0.531345	0.0244241
uS4_RPS9B.1.AT5G15200.2	0.861912	-0.115946	0.48803	0.0435481
eL13_RPL13D.1	0.298451	0.622544	0.47357	-1.00843
eL18_RPL18B.1.eL18_RPL18A.2.eL18_RPL18A.1	0.353364	0.479521	0.418431	-1.99969
uL3_RPL3A.9.AT1G43170.8.AT1G43170.7.AT1G43170.6.AT1G43170.5.AT1G43170.3.AT1G43170.2.AT1G43170.1.AT1G43170.4	0.00161897	0.703415	0.412858	-0.327732
P1.P2_RPP2B.3.AT2G27710.2.AT2G27710.1.AT2G27710.4	-0.00370396	0.679803	0.395344	-0.369653
P1.P2_RPP2A.1.AT2G27720.3.AT2G27720.2	0.230852	0.444859	0.343569	-1.54856
uS17_RPS11A.1	0.581088	-0.00835433	0.329183	-0.574349
eL19_RPL19A.1	0.0869632	0.483737	0.304901	-0.979062
eL8_RPL7aB.1	0.24024	0.344415	0.293684	-2.31548
uL3_RPL3B.1	0.325546	0.243794	0.285505	-2.56569
uL15_RPL27aB.1	0.0094298	0.466907	0.264104	-0.881728
eL42_RPL36aB.1eL42_RPL36aA.1.AT4G14320.2	-0.710045	0.729194	0.248823	0.111981
eL20_RPL18aB.1	0.436961	-0.0216727	0.23371	-0.909684
eS6_RPS6B.1.AT5G10360.2	-0.371121	0.59705	0.225825	-0.227199
eL8_RPL7aA.1	0.367798	0.0586257	0.225113	-1.30324
uL10_RPP0C.1	0.438219	-0.0864701	0.209899	-0.804204
uL1_RPL10aB.2.AT2G27530.1	-0.210383	0.487829	0.198461	-0.546853
uL30_RPL7D.3.AT3G13580.2.AT3G13580.1	0.628386	-0.706334	0.168913	-0.0236691
eL34_RPL34B.1	-0.231778	0.392939	0.128591	-0.720241
uL13_RPL13aA.1.AT3G07110.2	0.1734	0.0674843	0.121844	-2.47078
uL10_RPP0B.1.uL10_RPP0B.2.uL10_RPP0A.1	-0.721694	0.563831	0.11481	-0.106405
eL38_RPL38B.1.eL38_RPL38A.1	-0.370376	0.435952	0.111948	-0.502106
uS7_RPS5A.2.AT2G37270.1	-0.255461	0.370134	0.10548	-0.742034
eS28_RPS28B.1.eS28_RPS28A.1	-0.0304435	0.212022	0.09812	-1.67023
eL28_RPL28C.2.AT4G29410.1	0.381737	-0.310888	0.0942288	-0.658507
uL13_RPL13aB.1	-0.0590817	0.213337	0.0863757	-1.56677
uL18_RPL5A.1.AT3G25520.2	0.225148	-0.0780772	0.0849848	-1.46249
uL1_RPL10aA.1	0.362113	-0.322893	0.0771518	-0.685815
eL28_RPL28A.3.AT2G19730.2.AT2G19730.1	0.014744	0.131618	0.0748874	-2.41948
eL37_RPL37B.1eL37_RPL37C.1.eL37_RPL37A..1	0.233733	-0.11568	0.0742105	-1.33396
uL30_RPL7B.1.AT2G01250.2	0.308373	-0.237708	0.0721538	-0.903835
eS27_RPS27A.1.eS27_RPS27B.1.eS27_RPS27C.1	-0.279206	0.326906	0.0690851	-0.808153
eS7_RPS7C.1	-0.104272	0.208559	0.0643267	-1.45245
eL32_RPL32B.2.AT5G46430.1	0.0960206	0.0258677	0.0615592	-2.9425
uS17_RPS11C.1	0.443781	-0.707124	0.0254969	-0.283102
eS8_RPS8A.1.eS8_RPS8B.1	0.165687	-0.141227	0.0239586	-1.51161
eS24_RPS24A.1	-0.119551	0.147091	0.0226309	-1.65169
uS13_RPS18C.1.uS13_RPS18B.1.uS13_RPS18A.1	-0.0422134	0.0237009	-0.00871324	-3.07505
uL1_RPL10aC.2.AT5G22440.1	0.427303	-0.806046	-0.010183	-0.263615
eL6_RPL6A.1	0.180484	-0.342335	-0.0471404	-1.06466
eS7_RPS7B.2.AT3G02560.1	-0.057933	-0.0498647	-0.0538908	-5.22028
eL19_RPL19C.1	-0.276266	0.121659	-0.0576397	-1.33878
eS7_RPS7A.2.AT1G48830.1	-0.125828	-0.0237118	-0.0734669	-2.70256
eL30_RPL30B.1	-0.535415	0.216054	-0.0906936	-0.76856
eS21_RPS21B.2.AT3G53890.1	-0.36316	0.00625667	-0.161489	-1.51518
uL6_RPL9C.1.uL6_RPL9B.1	-0.0278336	-0.330694	-0.167842	-1.7165
eS24_RPS24B.1	-0.396942	0.0181293	-0.168024	-1.40812
uL18_RPL5B.2.AT5G39740.1	0.172654	-0.811839	-0.203037	-0.641731
uL30_RPL7C.1.AT2G44120.2	-0.166656	-0.251655	-0.208253	-3.02054
uS10_RPS20C.2.AT5G62300.1.uS10_RPS20A.1	-0.18135	-0.268584	-0.224016	-3.01038
eS12_RPS12C.3.AT2G32060.2.AT2G32060.1	-0.242086	-0.20825	-0.225025	-3.95791
eL19_RPL19B.1	-0.0874223	-0.419023	-0.23954	-1.69904
eL15_RPL15A.1.eL15_RPL15B.1	-0.214151	-0.306995	-0.259496	-2.98362
eL14_RPL14A.1	0.0430365	-0.713927	-0.265468	-0.936697
uL13_RPL13aD.2.AT5G48760.1	-0.310142	-0.236109	-0.272441	-3.22271
eL20_RPL18aC.1	-0.0797506	-0.513448	-0.273269	-1.47076
uL24_RPL26A.1	-0.451052	-0.176472	-0.304367	-1.94971
uS3_RPS3A.1	-0.576223	-0.101291	-0.310823	-1.42054
eL24_RPL24B.1	-0.289007	-0.34989	-0.318985	-3.46467
P1.P2_RPP1C.2.AT5G47700.1	-0.884363	0.0193899	-0.333687	-0.846456
eS21_RPS21C.1	-0.803381	-0.0480733	-0.356049	-1.02927
eL33_RPL35aB.1	-0.416058	-0.327277	-0.370683	-3.1395
eL27_RPL27B.1.eL27_RPL27A.1	0.0562058	-1.26306	-0.400029	-0.601428
eS1_RPS3aA.1	-1.00116	-0.0696455	-0.430647	-0.917021
uL6_RPL9D.1	-0.361614	-0.527076	-0.440927	-2.58879
eS12_RPS12A.2.AT1G15930.1	-0.743953	-0.277724	-0.48391	-1.61145
uL11_RPL12C.1	-0.906974	-0.223554	-0.507983	-1.2731
uS5_RPS2C.1	0.0780434	-2.35027	-0.530592	-0.360849
eS1_RPS3aB.1	-1.84576	-0.0417047	-0.582448	-0.568159
eS30_RPS30C.1.eS30_RPS30B.1.eS30_RPS30A.1	-0.697483	-0.944133	-0.813223	-2.56463
P1.P2_RPP1A.4.AT1G01100.2.AT1G01100.1.AT1G01100.3	-0.713632	-1.05922	-0.871571	-2.29054

## Sheet: B1 (Sub-stoichiometry DKO)
Log2(60S/Polysome at 20°C)
eS1_RPS3aB
eS1_RPS3aA
uS12_RPS23A or B
eL19_RPL19A
eL14_RPL14A
eS6_RPS6B
uS3_RPS3A
uS17_RPS11A
eL32_RPL32B
eS8_RPS8A or B
eL28_RPL28A
uL15_RPL27aB
uS8_RPS15aA, aC or aF
eL18_RPL18C
eL34_RPL34B
eL38_RPL38A or B
uL10_RPP0A or B
P1.P2_RPP1C
RACK1_RACK1A
P1.P2_RPP2B
uS4_RPS9B
Log2(60S/Polysome) at 10°C
eS1_RPS3aA
uS5_RPS2C
uS3_RPS3A
uL16_RPL10C
eS19_RPS19A
eS7_RPS7B
eL42_RPL36aA or aB
eL39_RPL39A or C
eL34_RPL34B
eL19_RPL19C
eL28_RPL28C
eL15_RPL15A or B
P1.P2_RPP2A
uL18_RPL5B
eL36_RPL36C
eL38_RPL38A or B
uL10_RPP0A or B
uS7_RPS5A
uL1_RPL10aC
eL27_RPL27A or B
RACK1_RACK1A

## Sheet: B2 (DKO_Ln_60S_Polysome_10C)
RPs	Cold	Cold.1	Cold.2	colMeans(t(clean_ratio_mat[, grep(\Cold\", x = colnames(clean_ratio_mat))]))"	colStdevs(t(clean_ratio_mat[, grep(\Cold\", x = colnames(clean_ratio_mat))]))"
RACK1_RACK1A.1	1.57067	2.16237	1.3567	1.75699	0.936503
eL27_RPL27B.1.eL27_RPL27A.1	0.835431	-0.79435	1.30711	0.765958	0.486941
uL1_RPL10aC.2.AT5G22440.1	1.06071	0.280561	-0.639846	0.457353	0.183288
uS7_RPS5A.2.AT2G37270.1	0.754926	0.430231	-0.0916432	0.42254	-0.498243
uL10_RPP0B.1.uL10_RPP0B.2.uL10_RPP0A.1	0.169173	0.292444	0.586452	0.365018	-1.14309
eL38_RPL38B.1.eL38_RPL38A.1	0.512365	0.193276	0.349523	0.360199	-1.4767
eL36_RPL36C.1	0.860313	-0.0530126	-0.0281638	0.356391	-0.210156
uL18_RPL5B.2.AT5G39740.1	0.337269	0.550376	-0.030953	0.313482	-0.959055
P1.P2_RPP2A.1.AT2G27720.3.AT2G27720.2	-0.520415	-0.453078	1.02462	0.291671	0.226053
eL15_RPL15A.1.eL15_RPL15B.1	0.482623	0.332401	-0.0985711	0.267674	-1.00779
uL1_RPL10aA.1	-0.378726	0.644135	0.261169	0.259159	-0.494613
eS24_RPS24A.1	0.51856	0.345793	-0.287217	0.247658	-0.737091
uL18_RPL5A.1.AT3G25520.2	-0.392224	0.554578	0.261881	0.214071	-0.624721
uL13_RPL13aA.1.AT3G07110.2	0.167664	0.497354	-0.124588	0.212356	-0.958108
uL30_RPL7C.1.AT2G44120.2	0.47343	0.363604	-0.449791	0.204778	-0.659139
eL8_RPL7aA.1	0.629852	-0.160612	-0.0628885	0.201035	-0.564509
P1.P2_RPP1C.2.AT5G47700.1	-0.132486	-0.515216	0.780863	0.197933	-0.1663
uL30_RPL7B.1.AT2G01250.2	-0.435717	0.0811448	0.563005	0.150507	-0.582217
eL32_RPL32B.2.AT5G46430.1	-0.22493	-0.0494324	0.551117	0.150009	-0.688346
eL18_RPL18B.1.eL18_RPL18A.2.eL18_RPL18A.1	0.129234	0.0440925	0.233868	0.138751	-2.21087
eL6_RPL6A.1	0.250117	-0.0803232	0.130787	0.109368	-1.70438
eS24_RPS24B.1	0.198149	0.00170559	0.115123	0.108215	-2.2171
eL34_RPL34A.1.AT1G26880.2	-0.382146	-0.144762	0.572564	0.101482	-0.537906
uS8_RPS15aF.1.uS8_RPS15aA.2.AT1G07770.1.uS8_RPS15aC.1	-0.407315	-0.0727602	0.473236	0.0646755	-0.724394
eL13_RPL13D.1	0.0493079	0.322093	-0.269866	0.0626736	-1.17601
eS8_RPS8A.1.eS8_RPS8B.1	-0.223675	0.209154	0.131703	0.0560587	-1.47763
eL14_RPL14A.1	0.177652	0.318665	-0.589006	0.0406875	-0.841544
uL11_RPL12C.1	-0.969754	0.219513	0.399595	0.0378953	-0.53757
eS19_RPS19C.1	-0.242358	0.260957	0.0315946	0.0376314	-1.35963
P1.P2_RPP2B.3.AT2G27710.2.AT2G27710.1.AT2G27710.4	-0.261461	-0.264326	0.431802	0.0255637	-0.809103
P1.P2_RPP1A.4.AT1G01100.2.AT1G01100.1.AT1G01100.3	0.100167	-0.183593	0.124707	0.0232109	-1.79481
uL1_RPL10aB.2.AT2G27530.1	-0.276708	0.152063	0.114106	0.0143563	-1.50095
uL30_RPL7D.3.AT3G13580.2.AT3G13580.1	0.132706	-0.0674357	-0.0527346	0.00840919	-2.15593
uL29_RPL35A.1	-0.65175	0.311497	0.102325	-0.00188736	-0.837685
uL24_RPL26A.1	0.399906	-0.1023	-0.606444	-0.0202945	-0.738368
eL22_RPL22C.1	0.307507	-0.435187	-0.0879424	-0.0260059	-1.02157
uL13_RPL13aB.1	0.0759005	-0.031539	-0.138056	-0.0274198	-2.26374
eL20_RPL18aC.1	-0.591832	0.327369	-0.0628293	-0.0409159	-0.873736
uL15_RPL27aC.1	0.0238181	-0.0923267	-0.0920297	-0.0519991	-2.73712
uL13_RPL13aD.2.AT5G48760.1	0.175545	-0.345402	-0.070554	-0.0577319	-1.41797
eS6_RPS6B.1.AT5G10360.2	-0.14107	0.0609603	-0.119349	-0.0623071	-2.23331
uL6_RPL9C.1.uL6_RPL9B.1	-0.18238	-0.0745139	0.0502024	-0.0643739	-2.21268
uL15_RPL27aB.1	0.0846859	-0.238004	-0.0865267	-0.0712505	-1.89323
eL28_RPL28A.3.AT2G19730.2.AT2G19730.1	-0.230981	-0.384142	0.209054	-0.10266	-1.2332
eL33_RPL35aB.1	-0.0368811	-1.28896	0.368187	-0.111132	-0.531334
eL14_RPL14B.1	-0.696204	-0.0869036	0.232395	-0.113969	-0.961914
eL20_RPL18aB.1	-0.854128	-0.0517119	0.245078	-0.12293	-0.844511
eL8_RPL7aB.1	-0.0276051	-0.083405	-0.360851	-0.147018	-1.92189
eL32_RPL32A.1	-0.393622	0.215901	-0.4145	-0.152274	-1.10536
eL37_RPL37B.1eL37_RPL37C.1.eL37_RPL37A..1	0.605104	-1.0063	-1.00936	-0.158033	-0.166474
uS13_RPS18C.1.uS13_RPS18B.1.uS13_RPS18A.1	0.0430483	-0.887211	0.0946009	-0.160556	-0.962502
uL3_RPL3A.9.AT1G43170.8.AT1G43170.7.AT1G43170.6.AT1G43170.5.AT1G43170.3.AT1G43170.2.AT1G43170.1.AT1G43170.4	-0.358007	-0.129215	-0.0397171	-0.166876	-2.01005
eL19_RPL19B.1	-0.332093	-0.245634	-0.0440774	-0.199871	-2.0886
eL30_RPL30B.1	0.145018	-0.168325	-0.801251	-0.202562	-1.03704
eL18_RPL18C.1	-0.626924	-0.000864948	-0.0902576	-0.203723	-1.39649
eS27_RPS27A.1.eS27_RPS27B.1.eS27_RPS27C.1	-0.167015	-0.685709	-0.0696857	-0.273294	-1.48348
uS4_RPS9B.1.AT5G15200.2	-0.817475	-0.734237	0.300558	-0.277939	-0.665253
eL19_RPL19A.1	-0.269756	-0.0748156	-0.560834	-0.282268	-1.7216
uS12_RPS23B.1.uS12_RPS23A.1	-0.398159	-1.29388	0.272881	-0.283467	-0.645208
eS7_RPS7C.1	-0.0711586	-1.18623	-0.0263753	-0.305323	-0.982672
eS12_RPS12C.3.AT2G32060.2.AT2G32060.1	-0.589767	-0.1087	-0.352911	-0.331241	-1.76149
eL28_RPL28C.2.AT4G29410.1	-1.07966	-0.342285	0.094576	-0.333587	-0.968165
eL19_RPL19C.1	-0.435602	-0.88649	0.047416	-0.353094	-1.13365
eL34_RPL34B.1	-0.85892	-0.138724	-0.231965	-0.362855	-1.4322
eL39_RPL39A.1.eL39_RPL39C.1	-0.113903	-0.815758	-0.409506	-0.406152	-1.49153
eL42_RPL36aB.1eL42_RPL36aA.1.AT4G14320.2	0.167083	-0.363029	-2.58953	-0.429515	-0.589231
eS7_RPS7B.2.AT3G02560.1	-0.801212	-0.844016	-0.030437	-0.484083	-1.18251
eS19_RPS19A.1	-0.53562	-2.37482	0.125264	-0.504299	-0.653046
uL16_RPL10C.1	-0.697047	-0.775869	-0.221224	-0.533359	-1.67628
uS3_RPS3A.1	-0.596931	-1.42743	-0.0319196	-0.533862	-1.00608
uS5_RPS2C.1	-0.148853	-0.475287	-1.35227	-0.543547	-1.19202
eS1_RPS3aA.1	-1.70029	-1.37328	-1.39521	-1.47887	-3.23662

## Sheet: B3 (DKO_Ln_60S_Polysome_20C)
RPs	Control	Control.1	Control.2	colMeans(t(clean_ratio_mat[, grep(\Control\", x = colnames(clean_ratio_mat))]))"	colStdevs(t(clean_ratio_mat[, grep(\Control\", x = colnames(clean_ratio_mat))]))"
uS4_RPS9B.1.AT5G15200.2	0.106715	1.55335	0.135385	0.845134	0.731235
P1.P2_RPP2B.3.AT2G27710.2.AT2G27710.1.AT2G27710.4	-0.21027	1.58184	0.187353	0.830049	0.804171
RACK1_RACK1A.1	0.927076	-0.38973	1.27163	0.814039	0.380851
P1.P2_RPP1C.2.AT5G47700.1	0.415644	0.199794	1.39437	0.813731	0.435145
uL10_RPP0B.1.uL10_RPP0B.2.uL10_RPP0A.1	-0.105043	-0.012797	1.55564	0.792344	0.784403
eL38_RPL38B.1.eL38_RPL38A.1	0.103016	0.086123	1.35275	0.704171	0.469138
eL34_RPL34B.1	-0.0153945	1.42578	-0.50716	0.650242	0.669717
eL18_RPL18C.1	0.10372	1.15662	0.232099	0.615134	0.142965
uS8_RPS15aF.1.uS8_RPS15aA.2.AT1G07770.1.uS8_RPS15aC.1	0.199265	1.06878	0.109377	0.559218	0.00810365
uL15_RPL27aB.1	0.43232	0.620843	0.597011	0.553503	-1.75272
eL6_RPL6A.1	0.430677	0.461183	0.518138	0.470659	-2.63797
eL32_RPL32A.1	-0.458989	1.25928	-0.4901	0.463182	0.515641
eS28_RPS28B.1.eS28_RPS28A.1	0.603211	0.036496	0.632382	0.45895	-0.748728
uL30_RPL7B.1.AT2G01250.2	0.117549	0.49385	0.644922	0.442373	-0.923849
eL28_RPL28C.2.AT4G29410.1	0.0260588	0.908568	0.122325	0.435518	-0.208998
uL30_RPL7C.1.AT2G44120.2	0.533116	0.103393	0.551431	0.416272	-1.04088
eL20_RPL18aB.1	-0.311847	0.733738	0.531693	0.409182	-0.361788
eL37_RPL37B.1eL37_RPL37C.1.eL37_RPL37A..1	0.941642	0.314496	-0.560019	0.406566	0.00303423
uS13_RPS18C.1.uS13_RPS18B.1.uS13_RPS18A.1	0.22502	0.0633699	0.725782	0.379375	-0.630746
eL33_RPL35aB.1	0.0326412	0.209495	0.746688	0.377576	-0.557238
P1.P2_RPP2A.1.AT2G27720.3.AT2G27720.2	-0.163876	0.672428	0.418579	0.366409	-0.581449
uS5_RPS2C.1	0.146087	-0.0816935	0.765739	0.343456	-0.427304
uL13_RPL13aA.1.AT3G07110.2	0.193658	0.271633	0.473725	0.320089	-1.58917
eS19_RPS19C.1	-0.37966	0.90963	-0.0430402	0.318543	-0.0309633
uL3_RPL3A.9.AT1G43170.8.AT1G43170.7.AT1G43170.6.AT1G43170.5.AT1G43170.3.AT1G43170.2.AT1G43170.1.AT1G43170.4	-0.281928	0.350693	0.574452	0.275239	-0.65648
uL15_RPL27aC.1	0.182183	0.259234	0.366669	0.272236	-2.10024
eL22_RPL22B.3.AT3G05560.2.AT3G05560.1	-0.0110363	-0.486663	0.811773	0.250913	-0.153321
eL18_RPL18B.1.eL18_RPL18A.2.eL18_RPL18A.1	0.0530236	0.303781	0.353296	0.245082	-1.62763
eL8_RPL7aB.1	0.178978	-0.347502	0.640535	0.236373	-0.513065
P1.P2_RPP1A.4.AT1G01100.2.AT1G01100.1.AT1G01100.3	0.16021	-0.147262	0.494319	0.203269	-0.93975
eS7_RPS7B.2.AT3G02560.1	0.158598	0.2394	0.2079	0.202517	-3.00294
eL27_RPL27B.1.eL27_RPL27A.1	0.705627	-0.524358	0.0400771	0.198289	-0.310526
eS7_RPS7C.1	0.144355	0.0440806	0.351649	0.18835	-1.6426
uL18_RPL5A.1.AT3G25520.2	-0.0483979	-0.0190228	0.455734	0.157358	-1.04218
eL36_RPL36C.1	0.464336	0.189645	-0.344588	0.156516	-0.815227
uL18_RPL5B.2.AT5G39740.1	0.220639	0.041873	0.192157	0.154578	-2.21503
eL8_RPL7aA.1	0.445352	-0.151915	0.0407965	0.143159	-1.01003
eL22_RPL22C.1	0.611596	0.105702	-0.823167	0.123368	-0.353286
eL14_RPL14B.1	-0.0188051	0.161313	0.202411	0.119493	-2.05228
eS24_RPS24B.1	-0.0211094	0.215648	0.115524	0.108029	-2.03272
eL20_RPL18aC.1	-0.16449	0.207651	0.186119	0.090351	-1.54343
eS7_RPS7A.2.AT1G48830.1	0.0827625	0.174424	0.00348638	0.0893336	-2.36724
eL13_RPL13D.1	0.106756	0.205186	-0.1059	0.0769397	-1.7925
uL1_RPL10aC.2.AT5G22440.1	-0.43206	-2.51202	0.913907	0.0721107	0.232316
uL6_RPL9C.1.uL6_RPL9B.1	-0.265505	-0.0528384	0.406434	0.0697765	-0.960689
uS7_RPS5A.2.AT2G37270.1	-0.147536	0.246829	-0.0214024	0.0397386	-1.53571
eL15_RPL15A.1.eL15_RPL15B.1	0.213497	0.0815525	-0.231749	0.0379746	-1.48719
eS24_RPS24A.1	-0.0409874	0.00457455	0.134173	0.0353724	-2.34529
uL13_RPL13aB.1	-0.12835	0.125198	0.0854092	0.033461	-1.99805
eS12_RPS12A.2.AT1G15930.1	0.0429601	-0.234835	0.218965	0.0261174	-1.48041
uL1_RPL10aB.2.AT2G27530.1	0.176661	-0.0241067	-0.263266	-0.0209016	-1.54946
eS27_RPS27A.1.eS27_RPS27B.1.eS27_RPS27C.1	-0.207728	0.252032	-0.216924	-0.0325038	-1.28751
eS19_RPS19A.1	-0.426135	0.225559	-0.101104	-0.065467	-1.19952
uL24_RPL26A.1	0.220384	-0.315714	-0.462029	-0.140862	-1.10548
eL28_RPL28A.3.AT2G19730.2.AT2G19730.1	-0.283218	-0.236972	0.0374798	-0.150606	-1.86314
eS8_RPS8A.1.eS8_RPS8B.1	0.0605318	-0.273498	-0.286659	-0.153197	-1.73093
eL32_RPL32B.2.AT5G46430.1	0.135701	0.100033	-1.18526	-0.160086	-0.747337
uS17_RPS11A.1	-0.285209	0.10988	-0.465859	-0.184084	-1.37077
uS3_RPS3A.1	-0.795967	-0.337636	0.271685	-0.191656	-0.817959
eS6_RPS6B.1.AT5G10360.2	0.0544455	-0.341176	-0.42454	-0.214448	-1.52565
eL14_RPL14A.1	-0.289162	-0.104522	-0.320311	-0.233375	-2.35382
eL19_RPL19A.1	-0.758241	0.460929	-1.2559	-0.248951	-0.35102
uS12_RPS23B.1.uS12_RPS23A.1	-0.725922	-0.155153	-1.00077	-0.56343	-1.36538
eS1_RPS3aA.1	-2.17602	-0.422497	-0.423318	-0.745303	-1.16245
eS1_RPS3aB.1	-2.71286	-0.750408	-1.2633	-1.29555	-1.59424

## Sheet: C (Statistical_Test)
RPs	P Values	P Values < 0.01 = ***; > 0.01 ^ < 0.05 = **; >0.05 ^ < 0.1 = *		Statistical test: glm(mydata7.1[,i] ~ Temperature, family = gaussian, contrasts = FALSE)	reil1.1reil2.2_L_20.C_60S/Polysome_Ratio	Col.0_R_20.C_60S/Polysome_Ratio	reil1.1reil2.2_R_20.C_60S/Polysome_Ratio	Col.0_L_10.C_60S/Polysome_Ratio	Col.0_R_20.C_60S/Polysome_Ratio	reil1.1reil2.1_R_20.C_60S/Polysome_Ratio	reil1.1reil2.2_L_10.C_60S/Polysome_Ratio	Col.0_R_10.C_60S/Polysome_Ratio	reil1.1reil2.2_R_10.C_60S/Polysome_Ratio	Col.0_R_10.C_60S/Polysome_Ratio	reil1.1reil2.1_R_10.C_60S/Polysome_Ratio
uL3_RPL3A.9.AT1G43170.8.AT1G43170.7.AT1G43170.6.AT1G43170.5.AT1G43170.3.AT1G43170.2.AT1G43170.1.AT1G43170.4	0.0258925	**		Factors in statistical test: Temperature, 2 levels = Control and Cold	Control_60S/Polysome_Ratio	Control_60S/Polysome_Ratio	Control_60S/Polysome_Ratio	Cold_60S/Polysome_Ratio	Control_60S/Polysome_Ratio	Control_60S/Polysome_Ratio	Cold_60S/Polysome_Ratio	Cold_60S/Polysome_Ratio	Cold_60S/Polysome_Ratio	Cold_60S/Polysome_Ratio	Cold_60S/Polysome_Ratio
eS1_RPS3aA.1	0.0477822	**		uL1_RPL10aB.2.AT2G27530.1	1.19323	0.810274	0.976182	0.925605	1.62878	0.768537	0.758276	1.14426	1.16423	1.0047	1.12087
uL15_RPL27aB.1	0.0488458	**		uL1_RPL10aC.2.AT5G22440.1	0.649171	1.53312	0.081104	0.543804	0.44662	2.49405	2.88841	1.40433	1.32387	1.5266	0.527374
eL28_RPL28C.2.AT4G29410.1	0.0580478	*		uL3_RPL3A.9.AT1G43170.8.AT1G43170.7.AT1G43170.6.AT1G43170.5.AT1G43170.3.AT1G43170.2.AT1G43170.1.AT1G43170.4	0.754328	1.00162	1.42005	0.82743	2.02064	1.77616	0.699068	0.68181	0.878785	0.844688	0.961061
uS4_RPS9B.1.AT5G15200.2	0.0594762	*		uL6_RPL9C.1.uL6_RPL9B.1	0.766819	0.97255	0.948533	0.911046	0.718425	1.50145	0.833285	0.630884	0.928195	1.04717	1.05148
uL15_RPL27aC.1	0.0613795	*		uL10_RPP0B.1.uL10_RPP0B.2.uL10_RPP0A.1	0.900286	0.485928	0.987285	3.33612	1.75739	4.73813	1.18432	1.5022	1.3397	2.18739	1.7976
eL8_RPL7aB.1	0.0656857	*		uL13_RPL13aA.1.AT3G07110.2	1.21368	1.18934	1.3121	0.852208	1.06981	1.60597	1.18254	0.918519	1.64436	0.697516	0.88286
eS7_RPS7B.2.AT3G02560.1	0.0712469	*		uL13_RPL13aB.1	0.879546	0.94263	1.13337	0.921645	1.2378	1.08916	1.07886	1.09566	0.968953	0.620622	0.87105
eL18_RPL18C.1	0.0873468	*		uL15_RPL27aB.1	1.54083	1.00947	1.8605	0.840069	1.59505	1.81668	1.08838	0.415074	0.7882	1.84701	0.917111
eL13_RPL13D.1	0.0888976	*		uL15_RPL27aC.1	1.19983	1.08415	1.29594	1.40638	2.8502	1.44292	1.0241	0	0.911807	0.517697	0.912078
RACK1_RACK1A.1	0.108317			uL18_RPL5A.1.AT3G25520.2	0.952755	1.25251	0.981157	0.566353	0.924893	1.57733	0.675553	1.1078	1.74121	1.45156	1.29937
eS27_RPS27D.1	0.141355			uL18_RPL5B.2.AT5G39740.1	1.24687	1.18846	1.04276	0.789564	0.444041	1.21186	1.40112	1.057	1.73391	0.919633	0.969521
eL34_RPL34B.1	0.147037			uL24_RPL26A.1	1.24656	0.636958	0.729268	1.08633	0.838222	0.630004	1.49168	1.17504	0.902759	0.763643	0.545286
uL13_RPL13aA.1.AT3G07110.2	0.18642			uL30_RPL7B.1.AT2G01250.2	1.12474	1.36121	1.63861	1.35415	0.788433	1.90584	0.646801	1.19557	1.08453	1.29855	1.75594
eS24_RPS24A.1	0.187216			uL30_RPL7C.1.AT2G44120.2	1.70423	0.84649	1.10893	1.27785	0.777513	1.73574	1.60549	5.8541	1.4385	1.05535	0.637762
uL13_RPL13aB.1	0.214956			eL6_RPL6A.1	1.5383	1.1978	1.58595	1.36985	0.71011	1.6789	1.28418	1.41066	0.922818	0.852534	1.13972
eL14_RPL14A.1	0.234759			eL8_RPL7aA.1	1.56104	1.44455	0.859061	0.95907	1.06038	1.04164	1.87733	1.64866	0.851622	0.723745	0.939048
eS19_RPS19C.1	0.236138			eL8_RPL7aB.1	1.19599	1.27155	0.706451	0.539088	1.41116	1.8975	0.972772	1.07794	0.919979	1.07401	0.697083
eL27_RPL27B.1.eL27_RPL27A.1	0.240344			eL13_RPL13D.1	1.11266	1.34777	1.22775	0.966268	1.86366	0.899514	1.05054	0.342471	1.38001	0.799541	0.763482
eS7_RPS7C.1	0.245898			eL14_RPL14A.1	0.748891	1.04398	0.900755	0.925774	0.489717	0.725923	1.19441	0.907655	1.37529	0.897687	0.554879
eL15_RPL15A.1.eL15_RPL15B.1	0.258995			eL14_RPL14B.1	0.981371	2.9481	1.17505	1.46192	1.26603	1.22435	0.498474	1.31305	0.916765	1.54766	1.26162
P1.P2_RPP1A.4.AT1G01100.2.AT1G01100.1.AT1G01100.3	0.266686			eL15_RPL15A.1.eL15_RPL15B.1	1.238	0.807226	1.08497	0.900815	0.735654	0.793145	1.62032	1.26387	1.39431	0.769335	0.906131
uS3_RPS3A.1	0.289794			eL18_RPL18B.1.eL18_RPL18A.2.eL18_RPL18A.1	1.05445	1.42385	1.35497	1.09121	1.6153	1.42375	1.13796	0.126816	1.04508	1.94333	1.26348
eL33_RPL35aB.1	0.332726			eL18_RPL18C.1	1.10929	2.42084	3.17918	1.01513	1.25347	1.26125	0.534232	1.05036	0.999135	1.7996	0.913696
eL18_RPL18B.1.eL18_RPL18A.2.eL18_RPL18A.1	0.346391			eL19_RPL19A.1	0.46849	1.09086	1.58555	0.443428	1.62212	0.284819	0.763566	1.68076	0.927915	0.861832	0.570733
uL24_RPL26A.1	0.35346			eL20_RPL18aB.1	0.732094	1.548	2.08285	0.745793	0.97856	1.70181	0.425654	1.57583	0.949602	1.67319	1.27772
eL20_RPL18aB.1	0.360557			eL20_RPL18aC.1	0.848326	0.923347	1.23078	1.03134	0.598429	1.20457	0.553313	0.66036	1.38731	1.636	0.939104
eL14_RPL14B.1	0.366565			eL27_RPL27B.1.eL27_RPL27A.1	2.02512	1.05782	0.591935	1.16962	0.282786	1.04089	2.30581	1.36201	0.451875	1.36015	3.69548
eS8_RPS8A.1.eS8_RPS8B.1	0.370738			eL28_RPL28A.3.AT2G19730.2.AT2G19730.1	0.753356	1.01485	0.789013	0.464239	1.14067	1.03819	0.793754	1.04965	0.681034	1.20365	1.23251
eL6_RPL6A.1	0.375781			eL28_RPL28C.2.AT4G29410.1	1.0264	1.46483	2.48077	0.255421	0.732796	1.13012	0.33971	0.440894	0.710146	1.14382	1.09919
eS7_RPS7A.2.AT1G48830.1	0.388562			eL32_RPL32A.1	0.631922	3.12009	3.52288	0.48739	0.646782	0.612565	0.674609	2.5206	1.24098	1.07687	0.66067
uS8_RPS15aF.1.uS8_RPS15aA.2.AT1G07770.1.uS8_RPS15aC.1	0.391477			eL32_RPL32B.2.AT5G46430.1	1.14534	1.10078	1.10521	0.576681	1.02621	0.305666	0.798572	0.93969	0.95177	0.825302	1.73519
uS13_RPS18C.1.uS13_RPS18B.1.uS13_RPS18A.1	0.399929			eL33_RPL35aB.1	1.03318	0.659642	1.23306	0	0.720884	2.11	0.963791	0.987915	0.275557	1.13476	1.44511
uS10_RPS20C.2.AT5G62300.1.uS10_RPS20A.1	0.405357			eL34_RPL34B.1	0.984723	0.793123	4.16109	0.768355	1.48133	0.602203	0.423619	0.624456	0.870468	0.45614	0.792974
eL32_RPL32A.1	0.407182			eL36_RPL36C.1	1.59096	2.27396	1.20882	0.808076	1.30411	0.708512	2.3639	1.57987	0.948368	1.1096	0.972229
eS1_RPS3aB.1	0.410616			eL37_RPL37B.1eL37_RPL37C.1.eL37_RPL37A..1	2.56419	1.26331	1.36957	1.80706	0.89076	0.571198	1.83144	2.8811	0.365569	0.704323	0.364453
uL30_RPL7C.1.AT2G44120.2	0.425017			eL38_RPL38B.1.eL38_RPL38A.1	1.10851	0.690475	1.08994	0.616926	1.54643	3.86806	1.66923	1.48855	1.21322	2.02027	1.41839
eS28_RPS28B.1.eS28_RPS28A.1	0.437603			P1.P2_RPP1A.4.AT1G01100.2.AT1G01100.1.AT1G01100.3	1.17376	0.489862	0.863068	2.38499	0.346726	1.63938	1.10536	0.839196	0.832274	1.53091	1.13282
P1.P2_RPP2A.1.AT2G27720.3.AT2G27720.2	0.473363			P1.P2_RPP1C.2.AT5G47700.1	1.51535	0.412977	1.22115	2.67393	1.01958	4.03244	0.875915	1.22917	0.597371	4.88831	2.18336
eS6_RPS6B.1.AT5G10360.2	0.526449			P1.P2_RPP2A.1.AT2G27720.3.AT2G27720.2	0.848847	1.25967	1.95899	1.01999	1.56027	1.5198	0.594274	0.650872	0.635669	12.3504	2.78605
uL1_RPL10aC.2.AT5G22440.1	0.567444			P1.P2_RPP2B.3.AT2G27710.2.AT2G27710.1.AT2G27710.4	0.810365	0.996303	4.86387	2.35893	1.97349	1.20605	0.769926	1.02463	0.767723	3.31115	1.54003
uL30_RPL7B.1.AT2G01250.2	0.571187			uS3_RPS3A.1	0.451145	0.562017	0.713455	1.6178	0.90367	1.31217	0.550498	2.3135	0.239926	1.54917	0.968584
uS12_RPS23B.1.uS12_RPS23A.1	0.581502			uS4_RPS9B.1.AT5G15200.2	1.11262	2.36768	4.72727	0.369943	0.890523	1.14498	0.441545	0	0.479872	0.841447	1.35061
uL18_RPL5B.2.AT5G39740.1	0.585915			uS5_RPS2C.1	1.1573	1.08117	0.921554	1.2375	0.0953437	2.15058	0.861696	2.22341	0.621706	1.60675	0.258652
uL6_RPL9C.1.uL6_RPL9B.1	0.586637			uS7_RPS5A.2.AT2G37270.1	0.862831	0.774559	1.27996	0.777685	1.44793	0.978825	2.12745	0	1.53761	1.00052	0.912431
eS27_RPS27A.1.eS27_RPS27B.1.eS27_RPS27C.1	0.623838			uS8_RPS15aF.1.uS8_RPS15aA.2.AT1G07770.1.uS8_RPS15aC.1	1.22051	0.976629	2.91182	0.689476	2.42581	1.11558	0.665434	2.42425	0.929824	1.53104	1.60518
P1.P2_RPP1C.2.AT5G47700.1	0.645308			uS10_RPS20C.2.AT5G62300.1.uS10_RPS20A.1	0	0.834143	0.796591	0	0.764461	1.7769	0	0	0.25134	1.61427	1.04294
eL38_RPL38B.1.eL38_RPL38A.1	0.65546			uS12_RPS23B.1.uS12_RPS23A.1	0.483878	2.99416	0.856284	2.35548	2.39146	0.367597	0.671555	0.345375	0.274204	1.48339	1.31374
eL19_RPL19A.1	0.679259			uS13_RPS18C.1.uS13_RPS18B.1.uS13_RPS18A.1	1.25235	0.958665	1.06542	1.78255	1.02398	2.06635	1.04399	0.587611	0.411803	1.19773	1.09922
P1.P2_RPP2B.3.AT2G27710.2.AT2G27710.1.AT2G27710.4	0.686674			uS17_RPS11A.1	0.751857	1.78798	1.11614	1.34665	0.99168	0.627596	0	1.9294	1.0899	0.608101	1.04469
uL1_RPL10aB.2.AT2G27530.1	0.733553			eS1_RPS3aA.1	0.113492	0.367452	0.655408	0.210967	0.932724	0.65487	0.182631	0	0.253275	0.433524	0.247781
eL36_RPL36C.1	0.740487			eS1_RPS3aB.1	0.066347	0.157906	0.472174	0.166212	0.959153	0.28272	0	0.404412	0.150349	0.654388	0
eL20_RPL18aC.1	0.741455			eS6_RPS6B.1.AT5G10360.2	1.05595	0.68996	0.710934	0.606736	1.81675	0.65407	0.868428	0.949908	1.06286	0.697907	0.887498
eS12_RPS12A.2.AT1G15930.1	0.766063			eS7_RPS7A.2.AT1G48830.1	1.08628	0.881767	1.19056	1.0822	0.976567	1.00349	0	0	0.74467	1.41303	1.34379
eS12_RPS12C.3.AT2G32060.2.AT2G32060.1	0.767491			eS7_RPS7B.2.AT3G02560.1	1.17187	0.943713	1.27049	1.35174	0.951358	1.23109	0.448784	0	0.42998	0.754075	0.970022
eL28_RPL28A.3.AT2G19730.2.AT2G19730.1	0.786895			eS7_RPS7C.1	1.15529	0.90098	1.04507	1.37989	1.2319	1.42141	0.931314	0.90061	0.305372	1.09128	0.973969
eS24_RPS24B.1	0.866443			eS8_RPS8A.1.eS8_RPS8B.1	1.0624	1.1802	0.760714	0.55501	0.868292	0.750767	0.799575	2.08352	1.23263	1.13259	1.14077
uL10_RPP0B.1.uL10_RPP0B.2.uL10_RPP0A.1	0.883792			eS12_RPS12A.2.AT1G15930.1	1.0439	0.475232	0.790701	0.464288	0.757506	1.24479	0	1.43808	1.22288	1.56306	1.03452
eL32_RPL32B.2.AT5G46430.1	0.883798			eS12_RPS12C.3.AT2G32060.2.AT2G32060.1	0	0.784988	0.551503	0.483038	0.812004	1.11807	0.554457	0.717223	0.896999	0.904648	0.702639
uS17_RPS11A.1	0.88457			eS19_RPS19C.1	0.684094	7.27718	2.4834	1.42183	1.21452	0.957873	0.784775	0	1.29817	1.8793	1.0321
uS5_RPS2C.1	0.904619			eS24_RPS24A.1	0.959841	0.887319	1.00459	1.20521	1.15846	1.14359	1.67961	2.45683	1.41311	1.02813	0.750349
eL8_RPL7aA.1	0.915584			eS24_RPS24B.1	0.979112	0.672373	1.24067	0.6846	1.01829	1.12246	1.21914	1.45785	1.00171	0.719766	1.12201
uS7_RPS5A.2.AT2G37270.1	0.978548			eS27_RPS27A.1.eS27_RPS27B.1.eS27_RPS27C.1	0.812428	0.756384	1.28664	1.33534	1.38667	0.804992	0.846187	0	0.503733	1.57493	0.932687
eL37_RPL37B.1eL37_RPL37C.1.eL37_RPL37A..1	0.991333			eS27_RPS27D.1	0	0	0.550449	0	0.974682	1.13415	0	0	0.73784	0	0
uL18_RPL5A.1.AT3G25520.2	0.991437			eS28_RPS28B.1.eS28_RPS28A.1	1.82798	0.970015	1.03717	2.06738	1.23618	1.88209	0	0	0.505271	2.43242	0.888715
eS30_RPS30C.1.eS30_RPS30B.1.eS30_RPS30A.1	0.992658			eS30_RPS30C.1.eS30_RPS30B.1.eS30_RPS30A.1	0	0.497837	0.636962	0.654304	0.389017	0.290627	1.0589	0	0	0.201105	0.250999
				RACK1_RACK1A.1	2.52711	1.49615	0.67724	1.35871	3.35989	3.56667	4.80985	3.33624	8.69169	4.71079	3.88337
