# Supplementary material for: Spatially Enriched Paralog Rearrangements Argue Functionally Diverse Ribosomes Arise during Cold Acclimation in Arabidopsis
Source: Int J Mol Sci. 2021 Jun 7;22(11):6160. doi: 10.3390/ijms22116160 (PMC8201131; doi:10.3390/ijms22116160)
Supplement: Supplementary file 1 [file ijms-22-06160-s001.zip › Table S5.xlsx]

## Sheet: Data
Table S5. Mean ratios of 20°C/10°C candidate ribosomal protein abundances during cold acclimation in Arabidopsis thaliana roots across independent experiments and genotypes in active translating polysomes (n = four; where two replicates are WT ratios and two dkoratios). The abundances were LFQ-normalized and corrected to the total amount of protein per ribosomal subunit in order to avoid relative…	Potential Paralog Ids	FoldChange_WT_DS2 - Normalized_Polysome_Root_Mat[\"Col.0_R_20.C_P.1\", ]/Normalized_Polysome_Root_Mat[\"Col.0_R_10.C_P.1\", ]	FoldChange_dko1_DS2 - Normalized_Polysome_Root_Mat[\"reil1.1reil2.1_R_20.C_P\", ]/Normalized_Polysome_Root_Mat[\"reil1.1reil2.1_R_10.C_P\", ]	FoldChange_WT_DS1 - Normalized_Polysome_Root_Mat[\"Col.0_R_20.C_P.0\", ]/Normalized_Polysome_Root_Mat[\"Col.0_R_10.C_P.0\", ]	FoldChange_dko2_DS1 - Normalized_Polysome_Root_Mat[\"reil1.1reil2.2_R_20.C_P\", ]/Normalized_Polysome_Root_Mat[\"reil1.1reil2.2_R_10.C_P\", ]	Mean	Standard Error	P values	Significances
AT2G25210.1.AT4G31985.1	eL39_RPL39A or C	-3	-0.76933	-1.75503	-3	-2.13109	0.540511	0.00333986	***
AT4G14320.1.AT3G23390.1.AT4G14320.2	eL42_RPL36aA or aB	-1.54837	-0.509248	-0.828499	-3	-1.47153	0.553895	0.00702017	***
AT4G27090.1	eL14_RPL14B	-0.43921	-0.739652	-0.654024	-0.971682	-0.701142	0.110115	0.00886989	***
AT5G02610.1.AT5G02610.2	uL29_RPL35D	-3	-3	NA	-3	NA	NA	0.0440056	**
AT1G26880.1.AT1G26880.2	eL34_RPL34A	-3	1.05882	-0.830526	-3	-1.44293	0.97821	0.0598525	*
AT2G44120.1.AT2G44120.2	uL30_RPL7C	0.688763	-0.456266	2.16599	0.988529	0.846755	0.538773	0.0696127	*
AT3G04920.1	eS24_RPS24A	0.199069	-0.0677181	0.392815	1.3147	0.459715	0.300221	0.0811832	*
AT3G14600.1	eL20_RPL18aC	0.955466	0.954805	0.0979686	1.22134	0.807395	0.244658	0.0934929	*
AT5G61170.1	eS19_RPS19C	-0.394109	-1.6212	-2.96201	-0.0519391	-1.25731	0.660585	0.106698
AT4G30800.1	uS17_RPS11B	-3	-3	NA	NA	NA	NA	0.134035
AT1G26910.1	uL16_RPL10B	NA	-3	NA	-3	NA	NA	0.134958
AT1G07070.1	eL33_RPL35aA	-3	-3	NA	NA	NA	NA	0.135112
AT3G04230.1	uS9_RPS16B	0.887008	3	0.0641044	1.80219	1.43833	0.630057	0.144413
AT4G25890.1	P1/P2_RPP3A	3	NA	3	NA	NA	NA	0.2189
AT3G05560.3.AT3G05560.2.AT3G05560.1	eL22_RPL22B	-0.897976	-1.69271	-2.09419	3	-0.42122	1.16717	0.284278
AT3G11940.2.AT3G11940.1	uS7_RPS5B	0.334523	1.19179	-3	-3	-1.11842	1.10033	0.300136
AT3G53890.2.AT3G53890.1	eS21_RPS21B	-0.891163	-0.216448	3	1.0147	0.726772	0.854295	0.301586
AT5G27770.1	eL22_RPL22C	0.350249	0.727905	-3	-0.802664	-0.681128	0.838702	0.303194
AT3G11250.1	uL10_RPP0C	3	-3	-1.58032	-3	-1.14508	1.42164	0.303792
AT2G31610.1	uS3_RPS3A	0.874793	-0.129099	0.151286	-0.0203608	0.219155	0.226038	0.308132
AT1G52300.1.AT3G16080.1.AT1G15250.1	eL37_RPL37A, B or C	-0.380045	0.261752	0.0607523	-1.46062	-0.379541	0.384475	0.327083
AT5G27700.1	eS21_RPS21C	-0.612232	-0.430112	0.588128	-3	-0.863554	0.75954	0.342405
AT3G44590.2.AT3G44590.1	P1/P2_RPP2D	0.301271	-3	-0.907717	-3	-1.65161	0.816672	0.352746
AT3G55170.2.AT3G55170.1	uL29_RPL35C	NA	NA	NA	-3	NA	NA	0.355918
AT3G02190.1	eL39_RPL39B	NA	NA	NA	-3	NA	NA	0.355918
AT4G29430.1	uS8_RPS15aE	NA	NA	NA	-3	NA	NA	0.355918
AT5G15520.1	eS19_RPS19B	NA	NA	3	NA	NA	NA	0.355918
AT5G02960.1.AT3G09680.1	uS12_RPS23A or B	-1.11995	0.355362	-1.26331	-0.0418442	-0.517434	0.398676	0.35935
AT3G09200.1.AT3G09200.2.AT2G40010.1	uL10_RPP0A or B	0.164573	-0.410598	0.142542	1.7273	0.405954	0.460105	0.369652
AT1G77940.1	eL30_RPL30B	-0.175702	-3	0.432836	-3	-1.43572	0.911642	0.372872
AT3G04840.1	eS1_RPS3aA	-0.196829	0.294125	-0.374162	-0.26628	-0.135786	0.147874	0.383273
AT1G43170.9.AT1G43170.8.AT1G43170.7.AT1G43170.6.AT1G43170.5.AT1G43170.3.AT1G43170.2.AT1G43170.1.AT1G43170.4	uL3_RPL3A	-0.823311	-0.706702	-0.0297859	-0.381324	-0.485281	0.17832	0.384457
AT4G33865.1.AT3G44010.1.AT3G43980.1	uS14_RPS29A, B or C	-2.36976	-0.825824	NA	NA	NA	NA	0.389771
AT5G20290.1.AT5G59240.1	eS8_RPS8A or B	0.0949287	0.114112	0.334165	-0.149377	0.0984573	0.0988422	0.396789
AT5G22440.2.AT5G22440.1	uL1_RPL10aC	2.43046	-0.980551	-1.16869	4.0577	1.08473	1.29076	0.406561
AT5G56670.1.AT4G29390.1.AT2G19750.1	eS30_RPS30A, B or C	-0.470171	-0.411816	-0.227683	-0.761354	-0.467756	0.110668	0.408132
AT3G24830.1	uL13_RPL13aB	-0.144072	1.14605	0.213063	-0.0192683	0.298943	0.291903	0.409163
AT1G70600.1	uL15_RPL27aC	-1.24968	-0.608079	-0.430079	-0.317579	-0.651353	0.208213	0.411803
AT1G18080.1	RACK1_RACK1A	0.630641	0.219809	-0.239122	1.47012	0.520362	0.363014	0.424928
AT5G16130.1	eS7_RPS7C	-0.146156	-0.852342	-0.594355	-0.207025	-0.44997	0.166852	0.431138
AT3G07110.1.AT3G07110.2	uL13_RPL13aA	0.0600064	-0.154416	-0.412909	-0.0742939	-0.145403	0.0995365	0.441374
AT5G47930.1	eS27_RPS27D	1.05908	-0.0110515	-0.0518128	0.729137	0.431337	0.275663	0.442206
AT1G66580.1	uL16_RPL10C	-2.76986	0.348816	-3	-3	-2.10526	0.819822	0.461785
AT3G53430.1	uL11_RPL12B	-2.19035	-0.184629	NA	NA	NA	NA	0.463509
AT2G21580.2.AT2G21580.1	eS25_RPS25B	-0.988232	0.190973	-0.133278	3	0.517366	0.864107	0.466684
AT5G39740.2.AT5G39740.1	uL18_RPL5B	0.52854	-0.670445	-0.770808	-0.201377	-0.278522	0.296262	0.468074
AT3G48930.1	uS17_RPS11A	-1.12575	-0.256241	-0.911014	-0.343125	-0.659032	0.21279	0.476379
AT5G67510.1	uL24_RPL26B	-3	NA	3	-3	NA	NA	0.480819
AT5G47700.2.AT5G47700.1	P1/P2_RPP1C	2.18942	0.0938446	1.39195	-0.0429678	0.90806	0.535679	0.481243
AT1G41880.1	eL33_RPL35aB	1.09123	0.043432	-0.142079	0.711809	0.426098	0.287705	0.48362
AT1G23290.1	uL15_RPL27aB	0.519845	-0.702018	-0.111583	-0.804697	-0.274613	0.305697	0.486397
AT5G10360.1.AT5G10360.2	eS6_RPS6B	-1.48643	-0.073993	0.0675465	-0.0160194	-0.377224	0.370875	0.491753
AT3G52580.1	uS11_RPS14C	3	NA	NA	-3	NA	NA	0.50376
AT1G01100.4.AT1G01100.2.AT1G01100.1.AT1G01100.3	P1/P2_RPP1A	1.99984	0.411038	-0.0598053	0.795054	0.786533	0.440595	0.521073
AT5G02450.1	eL36_RPL36C	-0.331423	-0.305026	-1.49504	-0.571427	-0.67573	0.279601	0.536198
AT3G46040.1	uS8_RPS15aD	-3	0.148811	NA	NA	NA	NA	0.549159
AT3G02080.1	eS19_RPS19A	-0.785561	-0.310944	3	-1.12857	0.193731	0.950322	0.551342
AT3G13580.3.AT3G13580.2.AT3G13580.1	uL30_RPL7D	1.09328	1.2995	-0.450462	-3	-0.264422	0.991933	0.55658
AT3G18130.1	RACK1_RACK1C	NA	NA	-0.123656	-3	NA	NA	0.561509
AT4G10450.1	uL6_RPL9D	0.758664	-3	-0.27038	-3	-1.37793	0.959771	0.565254
AT3G53870.1	uS3_RPS3B	-3	0.877392	0.71266	-3	-1.10249	1.09605	0.569709
AT1G14320.1.AT1G14320.2	uL16_RPL10A	-2.03111	-0.34284	3	NA	NA	NA	0.579248
AT3G02560.2.AT3G02560.1	eS7_RPS7B	-0.263224	-0.979606	-0.0221315	-0.535467	-0.450107	0.205293	0.585186
AT2G41840.1	uS5_RPS2C	2.07181	-2.21054	0.0789302	-0.942019	-0.250454	0.904691	0.59516
AT5G35530.1	uS3_RPS3C	NA	-3	0.252816	-3	NA	NA	0.595865
AT1G61580.1	uL3_RPL3B	1.22467	0.943419	-0.292387	-3	-0.281074	0.964337	0.633054
AT1G15930.2.AT1G15930.1	eS12_RPS12A	0.986114	0.0814157	0.0808954	0.672847	0.455318	0.225288	0.637228
AT3G06700.3.AT3G06700.2.AT3G06700.1.AT3G06680.3.AT3G06680.2.AT3G06680.1	eL29_RPL29A or B	-3	3	0.268671	NA	NA	NA	0.639303
AT2G20450.1	eL14_RPL14A	0.968612	0.55645	0.0738024	-0.149623	0.36231	0.250101	0.641332
AT2G37270.2.AT2G37270.1	uS7_RPS5A	-0.414549	0.287966	-0.101075	-0.213946	-0.110401	0.147764	0.672988
AT3G16780.1	eL19_RPL19B	1.11248	0.534686	-0.191808	-3	-0.386161	0.911218	0.677667
AT5G41520.1.AT5G41520.2	eS10_RPS10B	0.53103	-3	-1.0353	0.190858	-0.828352	0.798206	0.686932
AT5G39850.1	uS4_RPS9C	NA	NA	3	-3	NA	NA	0.711954
AT1G18540.1	eL6_RPL6A	0.804	0.42488	-0.43647	-0.769077	0.0058331	0.36615	0.719069
AT1G69620.1	eL34_RPL34B	-0.982809	0.435727	-0.0548838	-2.30209	-0.726015	0.602082	0.727486
AT3G09500.1	uL29_RPL35A	0.267331	0.643137	NA	-3	NA	NA	0.732494
AT5G62300.2.AT5G62300.1.AT3G45030.1	uS10_RPS20A or C	0.882193	-0.309848	0.0066081	-0.395865	0.0457721	0.291925	0.749757
AT1G48630.1	RACK1_RACK1B	1.08203	-3	3	-3	-0.479493	1.50696	0.754303
AT2G34480.1	eL20_RPL18aB	0.823997	-0.246901	0.569567	-0.687188	0.114868	0.351637	0.759972
AT5G23900.1	eL13_RPL13D	-1.0271	0.538698	0.404212	0.0484279	-0.00894073	0.354794	0.770038
AT3G59540.1.AT2G43460.1	eL38_RPL38A or B	0.783163	-0.830967	0.0945708	0.503005	0.137443	0.352402	0.774718
AT1G02780.1	eL19_RPL19A	-1.1099	0.0134081	0.268514	-0.0377118	-0.216423	0.305264	0.780861
AT3G25520.1.AT3G25520.2	uL18_RPL5A	0.883786	-0.241525	0.0967521	-0.652581	0.0216082	0.325675	0.782967
AT5G23740.1	uS17_RPS11C	-0.785824	0.799187	0.221007	-3	-0.691408	0.836306	0.788167
AT3G28900.1	eL34_RPL34C	-3	-3	3	-3	-1.5	1.5	0.788362
AT4G34670.1	eS1_RPS3aB	-0.0433021	-0.772074	-0.203493	0.0329635	-0.246476	0.181995	0.793089
AT5G48760.2.AT5G48760.1	uL13_RPL13aD	1.03504	0.264355	0.8796	-3	-0.205253	0.946325	0.795855
AT5G28060.1	eS24_RPS24B	-0.314358	-0.372143	-0.122433	0.286872	-0.130516	0.149013	0.799769
AT4G02230.1	eL19_RPL19C	0.459327	0.683649	3	-3	0.285744	1.23665	0.830033
AT2G27530.2.AT2G27530.1	uL1_RPL10aB	-0.279081	0.610533	0.0751237	-0.555497	-0.0372304	0.251547	0.83357
AT4G29410.2.AT4G29410.1	eL28_RPL28C	0.889181	0.10202	-0.466804	-1.08636	-0.140491	0.420336	0.848721
AT5G03850.1.AT3G10090.1	eS28_RPS28A or B	1.48611	-0.183648	-0.109759	0.352596	0.386325	0.385318	0.849959
AT3G22230.1.AT2G32220.1	eL27_RPL27A or B	0.964328	0.486532	-0.534351	-0.137931	0.194645	0.331619	0.855904
AT2G27710.3.AT2G27710.2.AT2G27710.1.AT2G27710.4	P1/P2_RPP2B	0.506239	-0.409737	0.855983	-2.04816	-0.273917	0.648825	0.861928
AT2G27720.1.AT2G27720.3.AT2G27720.2	P1/P2_RPP2A	2.05453	-0.224753	-0.176025	-0.727257	0.231623	0.620274	0.863095
AT2G01250.1.AT2G01250.2	uL30_RPL7B	0.991176	0.927589	-0.378504	-0.357639	0.295655	0.383446	0.864128
AT5G59850.1.AT1G07770.2.AT1G07770.1.AT2G39590.1	uS8_RPS15aA, aC or aF	-0.586756	0.349325	0.755445	-0.566215	-0.0120502	0.336282	0.866543
AT1G48830.2.AT1G48830.1	eS7_RPS7A	0.59319	-0.478958	0.34759	-0.257227	0.051149	0.251296	0.86658
AT3G62870.1	eL8_RPL7aB	-0.105468	0.521777	-0.325135	0.000675392	0.0229622	0.179578	0.869759
AT5G64140.1	eS28_RPS28C	0.463825	0.143838	0.309723	-3	-0.520653	0.829027	0.871013
AT5G27850.1	eL18_RPL18C	0.629436	0.0881804	0.299702	-1.76127	-0.185988	0.536773	0.882776
AT2G47610.1	eL8_RPL7aA	-0.134207	0.121777	0.277596	-1.30176	-0.259148	0.357753	0.888305
AT5G60670.1	uL11_RPL12C	3	-3	0.126445	0.156724	0.0707923	1.22544	0.889714
AT1G08360.1	uL1_RPL10aA	0.844641	0.0975407	0.173268	-3	-0.471138	0.859509	0.894522
AT4G16720.1.AT4G17390.1	eL15_RPL15A or B	0.361776	-0.325989	-0.0992164	-0.101121	-0.0411376	0.144468	0.897604
AT5G46430.2.AT5G46430.1	eL32_RPL32B	-0.250245	0.330757	-0.328036	0.487442	0.0599793	0.204703	0.901828
AT2G45710.1.AT3G61110.1.AT3G61111.1	eS27_RPS27A, B or C	-0.207604	0.459759	-0.309011	-0.0372505	-0.0235266	0.170572	0.920724
AT2G19730.3.AT2G19730.2.AT2G19730.1	eL28_RPL28A	0.0474565	0.0943601	0.0311733	-0.222887	-0.0124743	0.0714049	0.925252
AT3G53020.1	eL24_RPL24B	-0.317019	-0.00749538	-0.302503	0.70594	0.0197307	0.239593	0.944671
AT2G32060.3.AT2G32060.2.AT2G32060.1	eS12_RPS12C	0.541	-0.0780612	-0.394192	0.00841883	0.0192913	0.194239	0.944811
AT3G49910.1	uL24_RPL26A	-0.810789	0.450855	0.196181	0.108933	-0.0137048	0.275416	0.94903
AT1G33140.1.AT1G33120.1	uL6_RPL9B or C	0.23278	0.161866	-0.059414	0.0701361	0.101342	0.0630841	0.95362
AT4G09800.1.AT1G34030.1.AT1G22780.1	uS13_RPS18A, B or C	0.0887631	-0.409736	-0.0331538	0.0203469	-0.0834449	0.111588	0.954029
AT4G18100.1	eL32_RPL32A	-0.0195093	0.424833	0.254899	-1.65531	-0.248772	0.477698	0.960176
AT4G00810.2.AT4G00810.1	P1/P2_RPP1B	1.21226	NA	-0.0291929	-0.135957	NA	NA	0.968172
AT4G31700.1.AT4G31700.2	eS6_RPS6A	-1.85415	1.41923	3	-3	-0.10873	1.39657	0.96863
AT4G39200.2.AT4G39200.1	eS25_RPS25E	0.129387	-0.215676	NA	NA	NA	NA	0.971535
AT5G15200.1.AT5G15200.2	uS4_RPS9B	0.317918	0.590531	0.17434	-1.99527	-0.228119	0.595338	0.976537
AT5G09510.1.AT5G09510.2	uS19_RPS15D	NA	NA	-0.0556393	NA	NA	NA	0.979135
AT3G05590.1.AT2G47570.2.AT2G47570.1	eL18_RPL18A or B	0.902548	0.106403	0.263646	-0.512561	0.190009	0.29065	0.981798
AT1G80750.1	uL30_RPL7A	NA	NA	NA	NA	NA	NA	NA
AT1G57860.1.AT1G57660.1	eL21_RPL21E or G	NA	NA	NA	NA	NA	NA	NA
AT2G44860.2.AT2G44860.1	eL24_RPL24C	NA	NA	NA	NA	NA	NA	NA
