# Supplementary material for: Spatially Enriched Paralog Rearrangements Argue Functionally Diverse Ribosomes Arise during Cold Acclimation in Arabidopsis
Source: Int J Mol Sci. 2021 Jun 7;22(11):6160. doi: 10.3390/ijms22116160 (PMC8201131; doi:10.3390/ijms22116160)
Supplement: Supplementary file 1 [file ijms-22-06160-s001.zip › Table S6.xlsx]

## Sheet: 6A (binary_test_input)
Table S6. Binary input for the local enrichment test of transcriptome or proteome significances as detailed in the GitHub repository COSNeti (https://github.com/MSeidelFed/COSNet_i/) (Tab A). Tab B contains significantly changed probe hybridization intensities divided in RP families and categorized in colors according to the change trend. As input for the test we took the inversely regulated fami…		Transcriptomics_inversely regulated	Binary	Transcriptomics_inversely & upregulated	Binary	Transcriptomics_all	Binary	Proteomics_60S	Binary	Proteomics_polysome	Binary	Proteomics_all	Binary
RP families	Paralogs
uL1	A	0	uL1 0	0	uL1 0	0	uL1 0	0	uL1 0	0	uL1 0	0	uL1 0
uL1	B	0	uL1 0	0	uL1 0	0	uL1 0	0	uL1 0	0	uL1 0	0	uL1 0
uL1	C	0	uL1 0	0	uL1 0	1	uL1 1	0	uL1 0	0	uL1 0	0	uL1 0
uL2	A	0	uL2 0	0	uL2 0	0	uL2 0	0	uL2 0	0	uL2 0	0	uL2 0
uL2	B	0	uL2 0	0	uL2 0	0	uL2 0	0	uL2 0	0	uL2 0	0	uL2 0
uL2	C	0	uL2 0	0	uL2 0	0	uL2 0	0	uL2 0	0	uL2 0	0	uL2 0
uL3	A	0	uL3 0	0	uL3 0	0	uL3 0	1	uL3 1	0	uL3 0	1	uL3 1
uL3	B	0	uL3 0	0	uL3 0	0	uL3 0	0	uL3 0	0	uL3 0	0	uL3 0
uL4	A	1	uL4 1	1	uL4 1	1	uL4 1	0	uL4 0	0	uL4 0	0	uL4 0
uL4	D	1	uL4 1	1	uL4 1	1	uL4 1	0	uL4 0	0	uL4 0	0	uL4 0
uL5	A	0	uL5 0	0	uL5 0	0	uL5 0	0	uL5 0	0	uL5 0	0	uL5 0
uL5	B	0	uL5 0	0	uL5 0	0	uL5 0	0	uL5 0	0	uL5 0	0	uL5 0
uL5	C	0	uL5 0	0	uL5 0	0	uL5 0	0	uL5 0	0	uL5 0	0	uL5 0
uL5	D	0	uL5 0	0	uL5 0	1	uL5 1	0	uL5 0	0	uL5 0	0	uL5 0
uL6	B	0	uL6 0	0	uL6 0	0	uL6 0	0	uL6 0	0	uL6 0	0	uL6 0
uL6	C	0	uL6 0	0	uL6 0	0	uL6 0	0	uL6 0	0	uL6 0	0	uL6 0
uL6	D	0	uL6 0	0	uL6 0	0	uL6 0	0	uL6 0	0	uL6 0	0	uL6 0
uL10	A	0	uL10 0	0	uL10 0	0	uL10 0	0	uL10 0	0	uL10 0	0	uL10 0
uL10	B	0	uL10 0	1	uL10 1	1	uL10 1	0	uL10 0	0	uL10 0	0	uL10 0
uL10	C	0	uL10 0	0	uL10 0	0	uL10 0	0	uL10 0	0	uL10 0	0	uL10 0
uL11	A	0	uL11 0	0	uL11 0	0	uL11 0	0	uL11 0	0	uL11 0	0	uL11 0
uL11	B	0	uL11 0	0	uL11 0	0	uL11 0	0	uL11 0	0	uL11 0	0	uL11 0
uL11	C	0	uL11 0	1	uL11 1	1	uL11 1	0	uL11 0	0	uL11 0	0	uL11 0
uL13	A	0	uL13 0	0	uL13 0	0	uL13 0	0	uL13 0	0	uL13 0	0	uL13 0
uL13	B	0	uL13 0	0	uL13 0	0	uL13 0	0	uL13 0	0	uL13 0	0	uL13 0
uL13	C	0	uL13 0	0	uL13 0	0	uL13 0	0	uL13 0	0	uL13 0	0	uL13 0
uL13	D	0	uL13 0	0	uL13 0	0	uL13 0	0	uL13 0	0	uL13 0	0	uL13 0
uL14	A	0	uL14 0	0	uL14 0	0	uL14 0	0	uL14 0	0	uL14 0	0	uL14 0
uL14	B	0	uL14 0	0	uL14 0	0	uL14 0	0	uL14 0	0	uL14 0	0	uL14 0
uL14	C	0	uL14 0	0	uL14 0	0	uL14 0	0	uL14 0	0	uL14 0	0	uL14 0
uL15	A	0	uL15 0	0	uL15 0	0	uL15 0	0	uL15 0	0	uL15 0	0	uL15 0
uL15	B	0	uL15 0	0	uL15 0	0	uL15 0	1	uL15 1	0	uL15 0	1	uL15 1
uL15	C	0	uL15 0	0	uL15 0	1	uL15 1	1	uL15 1	0	uL15 0	1	uL15 1
uL16	A	0	uL16 0	0	uL16 0	0	uL16 0	0	uL16 0	0	uL16 0	0	uL16 0
uL16	B	0	uL16 0	0	uL16 0	0	uL16 0	0	uL16 0	0	uL16 0	0	uL16 0
uL16	C	0	uL16 0	0	uL16 0	0	uL16 0	0	uL16 0	0	uL16 0	0	uL16 0
uL18	A	0	uL18 0	0	uL18 0	0	uL18 0	0	uL18 0	0	uL18 0	0	uL18 0
uL18	B	0	uL18 0	0	uL18 0	0	uL18 0	0	uL18 0	0	uL18 0	0	uL18 0
uL22	A	0	uL22 0	0	uL22 0	0	uL22 0	0	uL22 0	0	uL22 0	0	uL22 0
uL22	B	0	uL22 0	0	uL22 0	0	uL22 0	0	uL22 0	0	uL22 0	0	uL22 0
uL23	A	0	uL23 0	0	uL23 0	0	uL23 0	0	uL23 0	0	uL23 0	0	uL23 0
uL23	B	0	uL23 0	0	uL23 0	0	uL23 0	0	uL23 0	0	uL23 0	0	uL23 0
uL24	A	1	uL24 1	1	uL24 1	1	uL24 1	0	uL24 0	0	uL24 0	0	uL24 0
uL24	B	1	uL24 1	1	uL24 1	1	uL24 1	0	uL24 0	0	uL24 0	0	uL24 0
uL29	B	0	uL29 0	0	uL29 0	0	uL29 0	0	uL29 0	0	uL29 0	0	uL29 0
uL29	C	0	uL29 0	0	uL29 0	0	uL29 0	0	uL29 0	0	uL29 0	0	uL29 0
uL29	D	0	uL29 0	0	uL29 0	1	uL29 1	0	uL29 0	1	uL29 1	1	uL29 1
uL30	A	0	uL30 0	0	uL30 0	0	uL30 0	0	uL30 0	0	uL30 0	0	uL30 0
uL30	B	0	uL30 0	0	uL30 0	0	uL30 0	0	uL30 0	0	uL30 0	0	uL30 0
uL30	C	1	uL30 1	1	uL30 1	1	uL30 1	0	uL30 0	1	uL30 1	1	uL30 1
uL30	D	1	uL30 1	1	uL30 1	1	uL30 1	0	uL30 0	0	uL30 0	0	uL30 0
eL6	A	0	eL6 0	0	eL6 0	0	eL6 0	0	eL6 0	0	eL6 0	0	eL6 0
eL6	B	0	eL6 0	0	eL6 0	0	eL6 0	0	eL6 0	0	eL6 0	0	eL6 0
eL6	C	0	eL6 0	0	eL6 0	0	eL6 0	0	eL6 0	0	eL6 0	0	eL6 0
eL8	A	0	eL8 0	0	eL8 0	1	eL8 1	0	eL8 0	0	eL8 0	0	eL8 0
eL8	B	0	eL8 0	0	eL8 0	0	eL8 0	1	eL8 1	0	eL8 0	1	eL8 1
eL13	B	0	eL13 0	0	eL13 0	0	eL13 0	0	eL13 0	0	eL13 0	0	eL13 0
eL13	C	0	eL13 0	0	eL13 0	0	eL13 0	0	eL13 0	0	eL13 0	0	eL13 0
eL13	D	0	eL13 0	0	eL13 0	1	eL13 1	1	eL13 1	0	eL13 0	1	eL13 1
eL14	A	0	eL14 0	0	eL14 0	0	eL14 0	0	eL14 0	0	eL14 0	0	eL14 0
eL14	B	0	eL14 0	0	eL14 0	0	eL14 0	0	eL14 0	1	eL14 1	1	eL14 1
eL15	A	0	eL15 0	0	eL15 0	0	eL15 0	0	eL15 0	0	eL15 0	0	eL15 0
eL15	B	0	eL15 0	0	eL15 0	0	eL15 0	0	eL15 0	0	eL15 0	0	eL15 0
eL18	A	0	eL18 0	0	eL18 0	0	eL18 0	0	eL18 0	0	eL18 0	0	eL18 0
eL18	B	0	eL18 0	0	eL18 0	0	eL18 0	0	eL18 0	0	eL18 0	0	eL18 0
eL18	C	0	eL18 0	0	eL18 0	0	eL18 0	1	eL18 1	0	eL18 0	1	eL18 1
eL19	A	0	eL19 0	0	eL19 0	0	eL19 0	0	eL19 0	0	eL19 0	0	eL19 0
eL19	B	0	eL19 0	0	eL19 0	1	eL19 1	0	eL19 0	0	eL19 0	0	eL19 0
eL19	C	0	eL19 0	0	eL19 0	0	eL19 0	0	eL19 0	0	eL19 0	0	eL19 0
eL20	A	0	eL20 0	0	eL20 0	0	eL20 0	0	eL20 0	0	eL20 0	0	eL20 0
eL20	B	0	eL20 0	0	eL20 0	1	eL20 1	0	eL20 0	0	eL20 0	0	eL20 0
eL20	C	0	eL20 0	0	eL20 0	0	eL20 0	0	eL20 0	1	eL20 1	1	eL20 1
eL20	D	0	eL20 0	0	eL20 0	0	eL20 0	0	eL20 0	0	eL20 0	0	eL20 0
eL21	A	0	eL21 0	0	eL21 0	0	eL21 0	0	eL21 0	0	eL21 0	0	eL21 0
eL21	C	0	eL21 0	0	eL21 0	0	eL21 0	0	eL21 0	0	eL21 0	0	eL21 0
eL21	E	0	eL21 0	1	eL21 1	1	eL21 1	0	eL21 0	0	eL21 0	0	eL21 0
eL21	G	0	eL21 0	1	eL21 1	1	eL21 1	0	eL21 0	0	eL21 0	0	eL21 0
eL22	A	0	eL22 0	0	eL22 0	0	eL22 0	0	eL22 0	0	eL22 0	0	eL22 0
eL22	B	0	eL22 0	0	eL22 0	0	eL22 0	0	eL22 0	0	eL22 0	0	eL22 0
eL22	C	0	eL22 0	1	eL22 1	1	eL22 1	0	eL22 0	0	eL22 0	0	eL22 0
eL24	A	0	eL24 0	0	eL24 0	0	eL24 0	0	eL24 0	0	eL24 0	0	eL24 0
eL24	B	0	eL24 0	0	eL24 0	0	eL24 0	0	eL24 0	0	eL24 0	0	eL24 0
eL24	C	0	eL24 0	0	eL24 0	0	eL24 0	0	eL24 0	0	eL24 0	0	eL24 0
eL27	A	0	eL27 0	0	eL27 0	1	eL27 1	0	eL27 0	0	eL27 0	0	eL27 0
eL27	B	0	eL27 0	0	eL27 0	0	eL27 0	0	eL27 0	0	eL27 0	0	eL27 0
eL27	C	0	eL27 0	0	eL27 0	0	eL27 0	0	eL27 0	0	eL27 0	0	eL27 0
eL28	A	0	eL28 0	0	eL28 0	0	eL28 0	0	eL28 0	0	eL28 0	0	eL28 0
eL28	C	0	eL28 0	0	eL28 0	0	eL28 0	1	eL28 1	0	eL28 0	1	eL28 1
eL29	A	0	eL29 0	0	eL29 0	1	eL29 1	0	eL29 0	0	eL29 0	0	eL29 0
eL29	B	0	eL29 0	0	eL29 0	0	eL29 0	0	eL29 0	0	eL29 0	0	eL29 0
eL30	A	0	eL30 0	0	eL30 0	0	eL30 0	0	eL30 0	0	eL30 0	0	eL30 0
eL30	B	0	eL30 0	0	eL30 0	0	eL30 0	0	eL30 0	0	eL30 0	0	eL30 0
eL30	C	0	eL30 0	0	eL30 0	0	eL30 0	0	eL30 0	0	eL30 0	0	eL30 0
eL31	A	0	eL31 0	1	eL31 1	1	eL31 1	0	eL31 0	0	eL31 0	0	eL31 0
eL31	B	0	eL31 0	0	eL31 0	0	eL31 0	0	eL31 0	0	eL31 0	0	eL31 0
eL31	C	0	eL31 0	0	eL31 0	0	eL31 0	0	eL31 0	0	eL31 0	0	eL31 0
eL32	A	0	eL32 0	1	eL32 1	1	eL32 1	0	eL32 0	0	eL32 0	0	eL32 0
eL32	B	0	eL32 0	0	eL32 0	0	eL32 0	0	eL32 0	0	eL32 0	0	eL32 0
eL33	A	0	eL33 0	0	eL33 0	0	eL33 0	0	eL33 0	0	eL33 0	0	eL33 0
eL33	B	0	eL33 0	0	eL33 0	0	eL33 0	0	eL33 0	0	eL33 0	0	eL33 0
eL33	C	0	eL33 0	0	eL33 0	0	eL33 0	0	eL33 0	0	eL33 0	0	eL33 0
eL33	D	0	eL33 0	0	eL33 0	0	eL33 0	0	eL33 0	0	eL33 0	0	eL33 0
eL33	E	0	eL33 0	0	eL33 0	0	eL33 0	0	eL33 0	0	eL33 0	0	eL33 0
eL34	A	0	eL34 0	0	eL34 0	0	eL34 0	0	eL34 0	1	eL34 1	1	eL34 1
eL34	B	0	eL34 0	0	eL34 0	0	eL34 0	0	eL34 0	0	eL34 0	0	eL34 0
eL36	A	0	eL36 0	0	eL36 0	0	eL36 0	0	eL36 0	0	eL36 0	0	eL36 0
eL36	B	0	eL36 0	1	eL36 1	1	eL36 1	0	eL36 0	0	eL36 0	0	eL36 0
eL36	C	0	eL36 0	0	eL36 0	0	eL36 0	0	eL36 0	0	eL36 0	0	eL36 0
el37	B	0	el37 0	0	el37 0	0	el37 0	0	el37 0	0	el37 0	0	el37 0
el37	C	0	el37 0	0	el37 0	0	el37 0	0	el37 0	0	el37 0	0	el37 0
eL38	A	1	eL38 1	1	eL38 1	1	eL38 1	0	eL38 0	0	eL38 0	0	eL38 0
eL38	B	1	eL38 1	1	eL38 1	1	eL38 1	0	eL38 0	0	eL38 0	0	eL38 0
eL39	A	0	eL39 0	0	eL39 0	1	eL39 1	0	eL39 0	1	eL39 1	1	eL39 1
eL39	B	0	eL39 0	0	eL39 0	1	eL39 1	0	eL39 0	0	eL39 0	0	eL39 0
eL39	C	0	eL39 0	0	eL39 0	0	eL39 0	0	eL39 0	1	eL39 1	1	eL39 1
eL40	A	0	eL40 0	1	eL40 1	1	eL40 1	0	eL40 0	0	eL40 0	0	eL40 0
eL40	B	0	eL40 0	0	eL40 0	0	eL40 0	0	eL40 0	0	eL40 0	0	eL40 0
eL41	A	0	eL41 0	0	eL41 0	0	eL41 0	0	eL41 0	0	eL41 0	0	eL41 0
eL41	B	0	eL41 0	0	eL41 0	1	eL41 1	0	eL41 0	0	eL41 0	0	eL41 0
eL41	C	0	eL41 0	0	eL41 0	0	eL41 0	0	eL41 0	0	eL41 0	0	eL41 0
eL41	D	0	eL41 0	0	eL41 0	1	eL41 1	0	eL41 0	0	eL41 0	0	eL41 0
eL41	E	0	eL41 0	0	eL41 0	0	eL41 0	0	eL41 0	0	eL41 0	0	eL41 0
eL41	F	0	eL41 0	0	eL41 0	0	eL41 0	0	eL41 0	0	eL41 0	0	eL41 0
eL41	G	0	eL41 0	0	eL41 0	0	eL41 0	0	eL41 0	0	eL41 0	0	eL41 0
eL42	A	0	eL42 0	0	eL42 0	0	eL42 0	0	eL42 0	1	eL42 1	1	eL42 1
eL42	B	0	eL42 0	1	eL42 1	1	eL42 1	0	eL42 0	1	eL42 1	1	eL42 1
eL43	A	0	eL43 0	0	eL43 0	0	eL43 0	0	eL43 0	0	eL43 0	0	eL43 0
eL43	C	0	eL43 0	0	eL43 0	0	eL43 0	0	eL43 0	0	eL43 0	0	eL43 0
P1	A	1	P1 1	1	P1 1	1	P1 1	0	P1 0	0	P1 0	0	P1 0
P1	B	0	P1 0	0	P1 0	0	P1 0	0	P1 0	0	P1 0	0	P1 0
P1	C	0	P1 0	0	P1 0	0	P1 0	0	P1 0	0	P1 0	0	P1 0
P2	A	1	P2 1	1	P2 1	1	P2 1	0	P2 0	0	P2 0	0	P2 0
P2	B	1	P2 1	1	P2 1	1	P2 1	0	P2 0	0	P2 0	0	P2 0
P2	C	1	P2 1	1	P2 1	1	P2 1	0	P2 0	0	P2 0	0	P2 0
P2	D	1	P2 1	1	P2 1	1	P2 1	0	P2 0	0	P2 0	0	P2 0
P2	E	1	P2 1	1	P2 1	1	P2 1	0	P2 0	0	P2 0	0	P2 0
uS2	A	0	uS2 0	0	uS2 0	0	uS2 0	0	uS2 0	0	uS2 0	0	uS2 0
uS2	B	0	uS2 0	0	uS2 0	0	uS2 0	0	uS2 0	0	uS2 0	0	uS2 0
uS3	A	0	uS3 0	0	uS3 0	0	uS3 0	0	uS3 0	0	uS3 0	0	uS3 0
uS3	B	0	uS3 0	0	uS3 0	0	uS3 0	0	uS3 0	0	uS3 0	0	uS3 0
uS3	C	0	uS3 0	0	uS3 0	0	uS3 0	0	uS3 0	0	uS3 0	0	uS3 0
uS4	B	0	uS4 0	0	uS4 0	1	uS4 1	1	uS4 1	0	uS4 0	1	uS4 1
uS4	C	0	uS4 0	0	uS4 0	0	uS4 0	0	uS4 0	0	uS4 0	0	uS4 0
uS5	A	0	uS5 0	0	uS5 0	0	uS5 0	0	uS5 0	0	uS5 0	0	uS5 0
uS5	B	0	uS5 0	0	uS5 0	1	uS5 1	0	uS5 0	0	uS5 0	0	uS5 0
uS5	C	0	uS5 0	0	uS5 0	0	uS5 0	0	uS5 0	0	uS5 0	0	uS5 0
uS5	E	0	uS5 0	0	uS5 0	0	uS5 0	0	uS5 0	0	uS5 0	0	uS5 0
uS5	F	0	uS5 0	0	uS5 0	0	uS5 0	0	uS5 0	0	uS5 0	0	uS5 0
uS7	A	0	uS7 0	0	uS7 0	0	uS7 0	0	uS7 0	0	uS7 0	0	uS7 0
uS7	B	0	uS7 0	0	uS7 0	0	uS7 0	0	uS7 0	0	uS7 0	0	uS7 0
uS8	A	0	uS8 0	0	uS8 0	0	uS8 0	0	uS8 0	0	uS8 0	0	uS8 0
uS8	B	0	uS8 0	0	uS8 0	0	uS8 0	0	uS8 0	0	uS8 0	0	uS8 0
uS8	C	0	uS8 0	0	uS8 0	0	uS8 0	0	uS8 0	0	uS8 0	0	uS8 0
uS8	D	0	uS8 0	0	uS8 0	0	uS8 0	0	uS8 0	0	uS8 0	0	uS8 0
uS8	E	0	uS8 0	0	uS8 0	0	uS8 0	0	uS8 0	0	uS8 0	0	uS8 0
uS8	F	0	uS8 0	0	uS8 0	1	uS8 1	0	uS8 0	0	uS8 0	0	uS8 0
uS9	A	0	uS9 0	0	uS9 0	0	uS9 0	0	uS9 0	0	uS9 0	0	uS9 0
uS9	B	1	uS9 1	1	uS9 1	1	uS9 1	0	uS9 0	0	uS9 0	0	uS9 0
uS9	C	1	uS9 1	1	uS9 1	1	uS9 1	0	uS9 0	0	uS9 0	0	uS9 0
uS10	A	0	uS10 0	0	uS10 0	0	uS10 0	0	uS10 0	0	uS10 0	0	uS10 0
uS10	B	0	uS10 0	0	uS10 0	0	uS10 0	0	uS10 0	0	uS10 0	0	uS10 0
uS10	C	0	uS10 0	1	uS10 1	1	uS10 1	0	uS10 0	0	uS10 0	0	uS10 0
uS11	A	0	uS11 0	1	uS11 1	1	uS11 1	0	uS11 0	0	uS11 0	0	uS11 0
uS11	B	0	uS11 0	0	uS11 0	0	uS11 0	0	uS11 0	0	uS11 0	0	uS11 0
uS11	C	0	uS11 0	0	uS11 0	0	uS11 0	0	uS11 0	0	uS11 0	0	uS11 0
uS12	A	0	uS12 0	0	uS12 0	1	uS12 1	0	uS12 0	0	uS12 0	0	uS12 0
uS12	B	0	uS12 0	0	uS12 0	0	uS12 0	0	uS12 0	0	uS12 0	0	uS12 0
uS13	A	0	uS13 0	0	uS13 0	0	uS13 0	0	uS13 0	0	uS13 0	0	uS13 0
uS13	B	0	uS13 0	0	uS13 0	0	uS13 0	0	uS13 0	0	uS13 0	0	uS13 0
uS13	C	0	uS13 0	0	uS13 0	0	uS13 0	0	uS13 0	0	uS13 0	0	uS13 0
uS14	A	0	uS14 0	0	uS14 0	0	uS14 0	0	uS14 0	0	uS14 0	0	uS14 0
uS14	B	0	uS14 0	0	uS14 0	0	uS14 0	0	uS14 0	0	uS14 0	0	uS14 0
uS14	C	0	uS14 0	1	uS14 1	1	uS14 1	0	uS14 0	0	uS14 0	0	uS14 0
uS15	A	0	uS15 0	0	uS15 0	0	uS15 0	0	uS15 0	0	uS15 0	0	uS15 0
uS15	B	0	uS15 0	0	uS15 0	0	uS15 0	0	uS15 0	0	uS15 0	0	uS15 0
uS17	A	0	uS17 0	0	uS17 0	0	uS17 0	0	uS17 0	0	uS17 0	0	uS17 0
uS17	B	0	uS17 0	0	uS17 0	1	uS17 1	0	uS17 0	0	uS17 0	0	uS17 0
uS17	C	0	uS17 0	0	uS17 0	0	uS17 0	0	uS17 0	0	uS17 0	0	uS17 0
uS19	A	0	uS19 0	0	uS19 0	0	uS19 0	0	uS19 0	0	uS19 0	0	uS19 0
uS19	B	0	uS19 0	0	uS19 0	0	uS19 0	0	uS19 0	0	uS19 0	0	uS19 0
uS19	C	0	uS19 0	0	uS19 0	0	uS19 0	0	uS19 0	0	uS19 0	0	uS19 0
uS19	D	0	uS19 0	0	uS19 0	0	uS19 0	0	uS19 0	0	uS19 0	0	uS19 0
uS19	E	0	uS19 0	0	uS19 0	0	uS19 0	0	uS19 0	0	uS19 0	0	uS19 0
uS19	F	0	uS19 0	0	uS19 0	0	uS19 0	0	uS19 0	0	uS19 0	0	uS19 0
eS1	A	0	eS1 0	0	eS1 0	0	eS1 0	1	eS1 1	0	eS1 0	1	eS1 1
eS1	B	0	eS1 0	0	eS1 0	0	eS1 0	0	eS1 0	0	eS1 0	0	eS1 0
eS4	A	0	eS4 0	1	eS4 1	1	eS4 1	0	eS4 0	0	eS4 0	0	eS4 0
eS4	B	0	eS4 0	0	eS4 0	0	eS4 0	0	eS4 0	0	eS4 0	0	eS4 0
eS4	C	0	eS4 0	0	eS4 0	0	eS4 0	0	eS4 0	0	eS4 0	0	eS4 0
eS6	A	0	eS6 0	0	eS6 0	0	eS6 0	0	eS6 0	0	eS6 0	0	eS6 0
eS6	B	0	eS6 0	0	eS6 0	0	eS6 0	0	eS6 0	0	eS6 0	0	eS6 0
eS7	A	0	eS7 0	0	eS7 0	0	eS7 0	0	eS7 0	0	eS7 0	0	eS7 0
eS7	B	0	eS7 0	0	eS7 0	0	eS7 0	1	eS7 1	0	eS7 0	1	eS7 1
eS7	C	0	eS7 0	0	eS7 0	1	eS7 1	0	eS7 0	0	eS7 0	0	eS7 0
eS8	A	0	eS8 0	0	eS8 0	0	eS8 0	0	eS8 0	0	eS8 0	0	eS8 0
eS8	B	0	eS8 0	0	eS8 0	0	eS8 0	0	eS8 0	0	eS8 0	0	eS8 0
eS10	A	0	eS10 0	0	eS10 0	0	eS10 0	0	eS10 0	0	eS10 0	0	eS10 0
eS10	B	0	eS10 0	0	eS10 0	0	eS10 0	0	eS10 0	0	eS10 0	0	eS10 0
eS12	A	0	eS12 0	1	eS12 1	1	eS12 1	0	eS12 0	0	eS12 0	0	eS12 0
eS12	C	0	eS12 0	1	eS12 1	1	eS12 1	0	eS12 0	0	eS12 0	0	eS12 0
eS17	A	0	eS17 0	0	eS17 0	1	eS17 1	0	eS17 0	0	eS17 0	0	eS17 0
eS17	B	0	eS17 0	0	eS17 0	1	eS17 1	0	eS17 0	0	eS17 0	0	eS17 0
eS17	C	0	eS17 0	0	eS17 0	0	eS17 0	0	eS17 0	0	eS17 0	0	eS17 0
eS17	D	0	eS17 0	0	eS17 0	1	eS17 1	0	eS17 0	0	eS17 0	0	eS17 0
eS19	A	1	eS19 1	1	eS19 1	1	eS19 1	0	eS19 0	0	eS19 0	0	eS19 0
eS19	B	0	eS19 0	0	eS19 0	0	eS19 0	0	eS19 0	0	eS19 0	0	eS19 0
eS19	C	1	eS19 1	1	eS19 1	1	eS19 1	0	eS19 0	0	eS19 0	0	eS19 0
eS21	A	0	eS21 0	0	eS21 0	0	eS21 0	0	eS21 0	0	eS21 0	0	eS21 0
eS21	B	0	eS21 0	0	eS21 0	1	eS21 1	0	eS21 0	0	eS21 0	0	eS21 0
eS24	A	0	eS24 0	0	eS24 0	0	eS24 0	0	eS24 0	1	eS24 1	1	eS24 1
eS24	B	0	eS24 0	1	eS24 1	1	eS24 1	0	eS24 0	0	eS24 0	0	eS24 0
eS25	A	0	eS25 0	0	eS25 0	0	eS25 0	0	eS25 0	0	eS25 0	0	eS25 0
eS25	B	0	eS25 0	1	eS25 1	1	eS25 1	0	eS25 0	0	eS25 0	0	eS25 0
eS25	D	0	eS25 0	0	eS25 0	0	eS25 0	0	eS25 0	0	eS25 0	0	eS25 0
eS25	E	0	eS25 0	0	eS25 0	0	eS25 0	0	eS25 0	0	eS25 0	0	eS25 0
eS26	A	0	eS26 0	0	eS26 0	0	eS26 0	0	eS26 0	0	eS26 0	0	eS26 0
eS26	B	0	eS26 0	0	eS26 0	0	eS26 0	0	eS26 0	0	eS26 0	0	eS26 0
eS26	C	0	eS26 0	0	eS26 0	0	eS26 0	0	eS26 0	0	eS26 0	0	eS26 0
eS27	A	0	eS27 0	0	eS27 0	0	eS27 0	0	eS27 0	0	eS27 0	0	eS27 0
eS27	B	0	eS27 0	0	eS27 0	0	eS27 0	0	eS27 0	0	eS27 0	0	eS27 0
eS27	C	0	eS27 0	0	eS27 0	0	eS27 0	0	eS27 0	0	eS27 0	0	eS27 0
eS28	A	0	eS28 0	0	eS28 0	0	eS28 0	0	eS28 0	0	eS28 0	0	eS28 0
eS28	B	0	eS28 0	0	eS28 0	0	eS28 0	0	eS28 0	0	eS28 0	0	eS28 0
eS28	C	0	eS28 0	0	eS28 0	0	eS28 0	0	eS28 0	0	eS28 0	0	eS28 0
eS30	A	0	eS30 0	0	eS30 0	1	eS30 1	0	eS30 0	0	eS30 0	0	eS30 0
eS30	B	0	eS30 0	0	eS30 0	1	eS30 1	0	eS30 0	0	eS30 0	0	eS30 0
eS30	C	0	eS30 0	0	eS30 0	0	eS30 0	0	eS30 0	0	eS30 0	0	eS30 0
eS31	A	0	eS31 0	0	eS31 0	0	eS31 0	0	eS31 0	0	eS31 0	0	eS31 0
eS31	B	0	eS31 0	0	eS31 0	0	eS31 0	0	eS31 0	0	eS31 0	0	eS31 0
eS31	C	0	eS31 0	0	eS31 0	0	eS31 0	0	eS31 0	0	eS31 0	0	eS31 0
RACK1	A	0	RACK1 0	0	RACK1 0	0	RACK1 0	0	RACK1 0	0	RACK1 0	0	RACK1 0
RACK1	B	0	RACK1 0	0	RACK1 0	0	RACK1 0	0	RACK1 0	0	RACK1 0	0	RACK1 0
RACK1	C	0	RACK1 0	0	RACK1 0	0	RACK1 0	0	RACK1 0	0	RACK1 0	0	RACK1 0

## Sheet: 6B (transcriptome)
7 Days			1 Day
Differentially regulated paralogs	RP family	Pattern	Differentially regulated paralogs	RP family	Pattern
eL13_RPL13D	eL13	down	eL13_RPL13D	eL13	down
eL19_RPL19B	eL19	down	eL21_RPL21G	eL21	up
eL20_RPL18aB	eL20	down	eL31_RPL31A	eL31	up
eL21_RPL21E; eL21_RPL21G	eL21	up	eL32_RPL32A	eL32	up
eL22_RPL22C	eL22	up	eL33_RPL35aA	eL33	up
eL27_RPL27A	eL27	down	eL37_RPL37C	eL37	up
eL29_RPL29A	eL29	down	eL40_RPL40A	eL40	up
eL31_RPL31A	eL31	up	eL42_RPL36aB	eL42	up
eL32_RPL32A	eL32	up	eL6_RPL6A	eL6	up
eL36_RPL36B	eL36	up	eL8_RPL7aB	eL8	up
eL38_RPL38A; eL38_RPL38B	eL38	inverse	eS12_RPS12A; eS12_RPS12C	eS12	inverse
eL39_RPL39A; eL39_RPL39B	eL39	down	eS17_RPS17C	eS17	up
eL40_RPL40A	eL40	up	eS24_RPS24A	eS24	down
eL41_RPL41B; eL41_RPL41D	eL41	down	eS25_RPS25E	eS25	down
eL42_RPL36aB	eL42	up	eS4_RPS4D	eS4	up
eL8_RPL7aA	eL8	down	eS7_RPS7C	eS7	up
eS12_RPS12A; eS12_RPS12C	eS12	up	P1/P2_RPP2B	P1/P2	up
eS17_RPS17A; eS17_RPS17B; eS17_RPS17D	eS17	down	uL11_RPL12C	uL11	up
eS19_RPS19A; eS19_RPS19C	eS19	inverse	uL13_RPL13aD	uL13	up
eS21_RPS21B	eS21	down	uL14_RPL23A	uL14	up
eS24_RPS24B	eS24	up	uL24_RPL26A	uL24	up
eS25_RPS25B	eS25	up	uL29_RPL35B	uL29	up
eS30_RPS30A; eS30_RPS30B	eS30	down	uL30_RPL7D	uL30	down
eS4_RPS4A	eS4	up	uL4_RPL4A	uL4	up
eS7_RPS7C	eS7	down	uL5_RPL11B	uL5	up
P1/P2_RPP1A; P1/P2_RPP2A; P1/P2_RPP2C; P1/P2_RPP2D; P1/P2_RPP2E; P1/P2_RPP3A	P1/P2	inverse	uS12_RPS23B	uS12	down
uL1_RPL10aC	uL1	down	uS19_RPS15D	uS19	up
uL10_RPP0B	uL10	up	uS8_RPS15aF	uS8	up
uL11_RPL12C	uL11	up
uL15_RPL27aC	uL15	down
uL24_RPL26A; uL24_RPL26B	uL24	inverse
uL29_RPL35D	uL29	down
uL30_RPL7C; uL30_RPL7D	uL30	inverse
uL4_RPL4A; uL4_RPL4D	uL4	inverse
uL5_RPL11D	uL5	down
uS10_RPS20C	uS10	up
uS11_RPS14A	uS11	up
uS12_RPS23A	uS12	down
uS14_RPS29C	uS14	up
uS17_RPS11B	uS17	down
uS4_RPS9B	uS4	down
uS5_RPS2B	uS5	down
uS8_RPS15aF	uS8	down
uS9_RPS16B; uS9_RPS16C	uS9	inverse

## Sheet: 6C (proteome)
RPs	P Values	P Values < 0.01 = ***; > 0.01 ^ < 0.05 = **; >0.05 ^ < 0.1 = *
60S/Polysome
uL3_RPL3A.9.AT1G43170.8.AT1G43170.7.AT1G43170.6.AT1G43170.5.AT1G43170.3.AT1G43170.2.AT1G43170.1.AT1G43170.4	0.0258925	**
eS1_RPS3aA.1	0.0477822	**
uL15_RPL27aB.1	0.0488458	**
eL28_RPL28C.2.AT4G29410.1	0.0580478	*
uS4_RPS9B.1.AT5G15200.2	0.0594762	*
uL15_RPL27aC.1	0.0613795	*
eL8_RPL7aB.1	0.0656857	*
eS7_RPS7B.2.AT3G02560.1	0.0712469	*
eL18_RPL18C.1	0.0873468	*
eL13_RPL13D.1	0.0888976	*
Polysome
eL39_RPL39A.1.eL39_RPL39C.1	0.00333986	***
eL42_RPL36aA.1.eL42_RPL36aB.1.AT4G14320.2	0.00702017	***
eL14_RPL14B.1	0.00886989	***
uL29_RPL35D.1.AT5G02610.2	0.0440056	**
eL34_RPL34A.1.AT1G26880.2	0.0598525	*
uL30_RPL7C.1.AT2G44120.2	0.0696127	*
eS24_RPS24A.1	0.0811832	*
eL20_RPL18aC.1	0.0934929	*
