# Supplementary material for: Spatially Enriched Paralog Rearrangements Argue Functionally Diverse Ribosomes Arise during Cold Acclimation in Arabidopsis
Source: Int J Mol Sci. 2021 Jun 7;22(11):6160. doi: 10.3390/ijms22116160 (PMC8201131; doi:10.3390/ijms22116160)
Supplement: Supplementary file 1 [file ijms-22-06160-s001.zip › Table S7.xlsx]

## Sheet: Legend
Table S7. Gene sequence alignment metadata. The coding sequence region of the nuclear encoded uL30_RPL7 gene RP family for the three taxa Arabidopsis thaliana, Homo sapiens and Saccharomyces cerevisiae (Tab A) were aligned using Bayesian confidence methods. The alignment was analyzed using jModelTest 2.1.10 (Tab B). The MCMC trace files were visualized in Tracer v1.7.1, which presented statistica…

## Sheet: 7A (Genes)
Gene IDs	Location
HS-RPL71L1	NC_000006.12:42879616-42889934 Homo sapiens chromosome 6, GRCh38.p13 Primary Assembly
HS-RPL7A	NC_000009.12:133348218-133351426 Homo sapiens chromosome 9, GRCh38.p13 Primary Assembly
HS-RPL7	NC_000008.11:c73294466-73290242 Homo sapiens chromosome 8, GRCh38.p13 Primary Assembly
AT-RPL7A	NC_003070.9:30348670-30350564 Arabidopsis thaliana chromosome 1 sequence
AT-RPL7B	NC_003071.7:c134455-132578 Arabidopsis thaliana chromosome 2 sequence
AT-RPL7C	NC_003071.7:c18251156-18248830 Arabidopsis thaliana chromosome 2 sequence
AT-RPL7D	NC_003074.8:4433047-4435305 Arabidopsis thaliana chromosome 3 sequence
SC-RPL7A	NC_001139.9:c365996-364335 Saccharomyces cerevisiae S288C chromosome VII, complete sequence
SC-RPL7B	NC_001148.4:173152-174702 Saccharomyces cerevisiae S288C chromosome XVI, complete sequence
Coding Sequences
> AT_uL30_RPL7A
ATGGCTGAGGAAGAAGCTAAGGGTTTGGATTACATACCGGAGATAGTACTGAAGAAGAGGAAGAACAGAGATGAGCTTGCCTTTATCAGGAAGAAGCAACTTGAGTTGGGTAATTCCGGCAAGAAGAAGAAGAAAGTCTCTGATATCAAACGTCCTGAAGATTTTGTTCATGAGTTCAGGGCTAAGGAAGTAGATATGATCCGGATGAAGCAAAGAGTAAAGAGGCCAAAGTCATCTCCTCCACCAGTTAAATCTGACCTGGTTTTCATCATACGCATTCAAGGCAAGAATGATATGCACCCAAAGACCAAGAGGATTCTTAACAATTTGCAACTAAAGAGCGTCTTTACTGGTGTATTTGCTAAAGCAACTGACAGTTTGTTCCAAAAGCTTCTCAAA…
> AT_uL30_RPL7B
CTAATTCATCCTCCTGATAAGCTCATTGATGAAGTTCTCACGGTTTCCGGCATCACCACCTTCCACGTAGTGATTTCTCTTCTTCTTGAGGCCACCTAGTGGTGCCTTAAGCTGGAATGGCCAAAGGAAGTTGTTGGCTTCCTTGAAATGAGGTCCTACTGTTAGAATCTCGTGGATCAAATCCTCAGTGCAAATGATACCATGCTTTCCAAGAGCCTGCTCTACAATAGAGTTGTCAGTCAAAGCTATCCTCTGGTGGTTAAGCTTTCCGTAACCTCTCTTGTAGATCAATTCCTTGACACTCTTCAAGTTAGGGAATCCGTAAGTGACATAGGGCTCAACACGGCGAAGCATGTTCATCGTAGCCTTGTTGACTTTAAGGAAAACACCATTGAAAAT…
> AT_uL30_RPL7C
TCAATTCATTCTCCTGACAAGCTCGTTGATGAAATTCTCCCTGTTTCCAGCATCACCACCTTCGACGTAGTGGTTTCTCTTCTTCTTAAGGCCACCGAGTGGTGCCTTCAATTGGAATGGCCACAGGAAGTTGTTGGCTTCCTTGAAGTGAGGTCCAACAGTCATGATCTCGTGGATGAGATCCTCAACGCAGATGATCCCATGCTTTCCGAGAGCCTGATCCACAATGGAGTTGTCAGTAAGTGCTATCCTCTGGTGGTTCAGCTTTCCATAACCTCTTTTGTAGATCAGTTCCTTAACGCTCTTCAAGTTTGGGTATCCGTAAGTCACGTATGGTTCAACTCGGCGCAGCATGTTTACTGTTGCCTTGTTCACCTTAAGAAACACACCATTGAAGAT…
> AT_uL30_RPL7D
ATGACTGAAGCAGAGTCCAAGACTGTTGTTCCTGAGTCAGTGTTGAAGAAGAGAAAGAGGGAGGAAGAATGGGCACTTGCCAAGAAACAGGAGCTTGAGGCTGCCAAAAAGCAGAATGCTGAGAAGAGGAAACTCATATTTAACCGGGCTAAACAGTACTCCAAGGAGTACCAGGAGAAAGAAAGGGAATTAATCCAGCTGAAGCGTGAGGCAAAATTGAAAGGAGGCTTTTATGTTGACCCAGAAGCTAAACTGCTTTTCATTATCCGTATCCGTGGTATCAATGCCATTGACCCAAAGACAAAGAAGATTTTGCAACTTTTGCGTTTAAGACAGATTTTCAATGGTGTGTTCTTGAAGGTCAACAAGGCAACCATTAACATGCTTCGCCGTGTTGAA…
> HS_RPL7A
ATGCCCAAGGGCAAGAAGGCCAAGGGCAAGAAGGTGGCCCCCGCCCCCGCCGTGGTGAAGAAGCAGGAGGCCAAGAAGGTGGTGAACCCCCTGTTCGAGAAGAGGCCCAAGAACTTCGGCATCGGCCAGGACATCCAGCCCAAGAGGGACCTGACCAGGTTCGTGAAGTGGCCCAGGTACATCAGGCTGCAGAGGCAGAGGGCCATCCTGTACAAGAGGCTGAAGGTGCCCCCCGCCATCAACCAGTTCACCCAGGCCCTGGACAGGCAGACCGCCACCCAGCTGCTGAAGCTGGCCCACAAGTACAGGCCCGAGACCAAGCAGGAGAAGAAGCAGAGGCTGCTGGCCAGGGCCGAGAAGAAGGCCGCCGGCAAGGGCGACGTGCCCACCAAGAGGCCC…
> HS_RPL7
ATGGAGGGCGTGGAGGAGAAGAAGAAGGAGGTGCCCGCCGTGCCCGAGACCCTGAAGAAGAAGAGGAGGAACTTCGCCGAGCTGAAGATCAAGAGGCTGAGGAAGAAGTTCGCCCAGAAGATGCTGAGGAAGGCCAGGAGGAAGCTGATCTACGAGAAGGCCAAGCACTACCACAAGGAGTACAGGCAGATGTACAGGACCGAGATCAGGATGGCCAGGATGGCCAGGAAGGCCGGCAACTTCTACGTGCCCGCCGAGCCCAAGCTGGCCTTCGTGATCAGGATCAGGGGCATCAACGGCGTGAGCCCCAAGGTGAGGAAGGTGCTGCAGCTGCTGAGGCTGAGGCAGATCTTCAACGGCACCTTCGTGAAGCTGAACAAGGCCAGCATCAACATGCTG…
> HS_RPL7L1
ATGATCAGCAGCTGCACCACCAGGAAGATGGCCGAGCAGGAGCAGAGGAAGATCCCCCTGGTGCCCGAGAACCTGCTGAAGAAGAGGAAGGCCTACCAGGCCCTGAAGGCCACCCAGGCCAAGCAGGCCCTGCTGGCCAAGAAGGAGCAGAAGAAGGGCAAGGGCCTGAGGTTCAAGAGGCTGGAGAGCTTCCTGCACGACAGCTGGAGGCAGAAGAGGGACAAGGTGAGGCTGAGGAGGCTGGAGGTGAAGCCCCACGCCCTGGAGCTGCCCGACAAGCACAGCCTGGCCTTCGTGGTGAGGATCGAGAGGATCGACGGCGTGAGCCTGCTGGTGCAGAGGACCATCGCCAGGCTGAGGCTGAAGAAGATCTTCAGCGGCGTGTTCGTGAAGGTGACC…
> SC_RPL7A
ATGGCTGCTGAAAAAATTCTTACACCAGAATCACAACTTAAAAAATCAAAAGCTCAACAAAAAACAGCTGAACAAGTTGCTGCTGAAAGAGCTGCTAGAAAAGCTGCTAATAAAGAAAAAAGAGCTATTATTCTTGAAAGAAATGCTGCTTATCAAAAAGAATATGAAACAGCTGAAAGAAATATTATTCAAGCTAAAAGAGATGCTAAAGCTGCTGGATCATATTATGTTGAAGCTCAACATAAACTTGTTTTCGTTGTTAGAATTAAAGGAATTAATAAAATTCCACCAAAACCAAGAAAAGTTCTTCAACTTCTTAGACTTACAAGAATTAATTCAGGAACATTCGTTAAAGTTACAAAAGCTACACTTGAACTTCTTAAACTTATTGAACCATAT…
> SC_RPL7B
ATGTCAACAGAAAAAATTCTTACACCAGAATCACAACTTAAAAAAACAAAAGCTCAACAAAAAACAGCTGAACAAATTGCTGCTGAAAGAGCTGCTAGAAAAGCTGCTAATAAAGAAAAAAGAGCTATTATTCTTGAAAGAAATGCTGCTTATCAAAAAGAATATGAAACAGCTGAAAGAAATATTATTCAAGCTAAAAGAGATGCTAAAGCTGCTGGATCATATTATGTTGAAGCTCAACATAAACTTGTTTTCGTTGTTAGAATTAAAGGAATTAATAAAATTCCACCAAAACCAAGAAAAGTTCTTCAACTTCTTAGACTTACAAGAATTAATTCAGGAACATTCGTTAAAGTTACAAAAGCTACACTTGAACTTCTTAAACTTATTGAACCATAT…
Genomic Sequences
>HS-RPL71L1
GTAGCTAGGAGCGGACGCCATAGGTGCATTGTGGGAAGCACTTTGCTGTCCACAGCCAGGCCGCTTGTGA
TGAAACTGTAACTTACAAGAAAAGGGCTGGGTTTTGAAAATAACACAGGCTCTAAAAACCCTAAGAAGCG
GTGCAACTTTTGGCAGGAATCGGGGTTAGCGGGACCTCAAGGGCTCACTGCGGCTAAGTGAACGCTGACT
GGTCCTCCAGCGTGAGCTAGAACAGACGTCTCTATGGTCAAGTAAACAGAGCGTGTGCTGTCTTCCCCAT
GTGGTGGGGTTGCGCATGATCAGTAGCTGCACCACTAGAAAGATGGCGGAGCAAGAGTGAGTGTTTGGGG
CTTTGAATATCTGGAGTGGGGTCTTGAGTATCCGGTGCCATCCACGGTGTTTATGCCTTGGTGGCGGATT
CCTGTGGGCTCTAGGAATAGAAAAGGCCACAGTTTACAAAGGGTGGGGGTGAGGAGGAGTAGCGCTGTGG
CGGAGGAGGGAGGGGACCGCGGTCAAGTTCGGGTTATCTGGAGAGGCGAGGATTGACTTCAGGCAGCGGG
CTGGAGTGCCACAGTTGAATTCACCCAGCCCGACAAGTGTTAACTCTGCAGATAGGCCTGCCCCCGCCCC
AACCCCATAGATTCGTCGCTGCTAGTGCCTATGAAGAACTGTGGCCGTGAAAACCCTGTTAACTTATACG
AACCCAGAGGCTAAAGGATTCATTATTTTCCGAGGCTTTGGGGATGAGTGACTATTAGGGATGGATTTAT
GAGGCCTGGAGTCAGAAACCGCAGGTTTCAGGGGAATCTTTCTTCAGATACTTGAAAACAGTAATGTTCC
CTAAAGCCCAGGATATTGAATTGGTTTGGAAATCCATTGAATGTTCGTTTTCTTTTTTGTTGTTGTTTTT
GTTTTGAGACGGAGTCTTGCTCTGTCCCCCAGGCTGGAGCGCAGTGTCGGGATCTCGGCTCGGTGCAACC
TCCGCCTCCCGGGTTCAAGCGATTCTCCTGCCTCAGTCTCCCGAGTAGCTGGGATTACAGGCGTGCGCCA
CCACGCCCAGCTGATTTTTTATTTTTAGTAGAAACGGGGGTTTCACCATGTTGGTCAGGCTGGTCTCGAA
CTCCTGACCTCAGGTAATCCACCCACCTCGGCCTCCCAGAGTGCTGGGATTACAGGCTTGAGCCACCGAG
CCCGGCCAAGTGTTCTTTTCTAAATGTTATCTCTGATCTCAATTTTCTGCATCAGGCAAAGAAAAATCCC
TTTGGTTCCAGAAAATCTCCTGAAAAAGAGGAAGGCTTATCAAGCCCTCAAAGCCACCCAGGCAAAGCAG
GCACTTTTGGCAAAGAAGGAGGTAATGGTGGGGAACCAAGAGAAAGTAATTAGAATTTTTATTTGGTGAG
TTTTATCCCGCATGTGTTGGACTACATTTGGTATTGACGAGCTCCCCCCAACGGTTTGACAGACCAGGTA
TAGTTGTCTCTCAGTGTCCTTAAGGGGTTGGTTCCAGGACTCCCACAGATGCCTAAATCTCAGACTGCTG
AAGTCCCTTATATAAAATGGTTGTAGTAGGCCGGGCGCGGTGGCTCACGCCTGTAATCCCTGCACTTTGG
GAGGCCGAGGCGGGCGTATCACGAGGTCAGGAGATCGAGACCATCCTGGCTAACACGGTGAAACCCCGTC
TCTACTAAAAATATAAAAAATTAGCCGGGCATGGTGGCAGGCTCCTGTAGTCCCAGCTACTCGGGAGGCC
GAGGCAGGAGAATGGCGTGAACTCGGGAGGTGGAGGTTGCAGTGAGCCAAGTTCGTGCCACTGTACTCCA
GCCTGGGCGACAGAGCGAGACACTCTCTCAAAAAATAAATAAATAAATAAATAACTGGTTGTAGTATTTG
CATATAATCTATACTCCTTCCGCCTATGTAGTTTAAATCCTCTCTGGATTGCTTAATAGCTTTATTTATT
TATTTATTTATTTTGAGGCAAGAGTCTCACTCTTGCCTAGAGTGGAGTGCAGTGGCACAATCTCGACTCA
CTGCAACCTCTGCCTACTGGGCTCAAGCAATTCTCGTGCCTCAGCCAACCAAGTAGCTAGGATTACAAGC
ATGCGCCACCACACCTGGCTAATTTTTTTTTTAACTTAATTTAATTTTGTTTTGTTTTTTGAGACAGAGA
CTCACTCTGTCACCCAGGCTGGAGTGCAGTGATGCGATCTTGGCTTACCACAACCTCCGCCGCCTCCCGG
GTTCAAGCGATTCTCCTGCCTCAGCCTCCCAAGTAGCTGGGATTACAAGGATGTGCCACCATGCCCTGCT
AATTTTTGTATTTTTAGTAGAGACCGGGTTTCACCATGTTGGCCAGGCTGGTGTCCAACTCATGGACTCA
AGTGATCTGCCCACCTCGGCCTCCCAAAGTGCTGCGATTACTGATGTCAGCCACCCCACCCGGCCACCGG
CTGATTTTTGTATTTTTAGTAGAGATGTTTTGACATGTTGGCCATGCTGGTCTCAAACTCCCGGCCTCAA
GTGATCACCCACCGGCCTTCCAAAGTGCTGGGATTACAGGCCTGAGCCACCCTGCCTGGCCTGGATTACT
GATAGCTAATACAGTGTACATAATGTATTTTAAAAATTTGTATTACTTTTTACGGTTATTTTTCATTTTT
TCCCCTGAATTTTTTTTTTTTTTTTTTTTTAAGAGTGAGGTCAGCTGGGCTCACATCTGTAATCCCAACA
CTTTGGGAGGCTGAGGCGGGCAGATTACTTGAGGTCAGGAGTTCAAGACCAGCCTGGCCAACATGGTGAA
ACCCCATCTCTACTAAAAATACAAAAAATTAGACGGGCACTGTGGCATGCGCCTGTAATCCTAGCTAATC
AGGGGGCTGAGGCAGGAGAATTGCTTGAACCCGAGAGGCGGAGGTTGCAGTGAGCTGAGATTGTGCCACT
GCACTCCAGCCTGAGTGACAGAGCAAAACCCTGTCTCAAAAAAAAAAAAAAAAAAATAAGTGGGGTCTTT
GGCCAGGTGTGGTAGCTCATGCCTGTTATCCCAGCACTTTGGGAGGCTGAGGCAGGTGGATCTCCTGAAG
TCAGGAGTTTGAGACCAAGCTGGCCAACAAGGTGACCCTGTCTCTACTAAAAATACAAAAATTAGCCGGG
TGTGGTGGCGCATGCCTGTAATCCCAGCTACTTGGGAGGCTGAGGCAGGAAAATGGCTTGAACTCAGGTG
GCAGAGGTTGCAGTGAGCCGAGATCATATCACTGCACTCCAGCCTGGGCGACAGAGCGAGACCCCATCTC
AGAAAAAAAAAAGAACAAGGAGTGAGGTCTTGTGTTACCCAGGCTAGAGTGCAGTGGCAGGATCATAGCT
CATTGCAGCCTTGAATTCCTGGGTTCAAGAGAACCTCCCGCCTCAGCCTCCTAAGTAGCTGGGACTACAG
GGTGAGCTACTGTATGTGCTCCTCCAAAGTATTTTCCATCTGGGGTTGGTTGAATCACAGATGCAGAGCA
CCAAGTGTATATGGTTTATGTCTTCATTTAGCAAATATTTAACACCTGCAGGCAAATGCTGGCGTGGAGT
TTAAGGAAACTTGTTAGTAAACACTGATTAATATGTAAACTAATTTTTTGTTCGTTATTTTTCCCAATAA
TTCCCAAGTTTCCTCAACTCCACCTTTACTTTGGTTTCTCATTTTTCCTTTATATGAAAATAGAGAATGT
TGCTTTGCTTCGCATTGTGGAACACGGGGAAATAAGCTATATCAGTTGTCACTTATGAATTACTGTTCTA
AAAGTAAAAATGTATGGAGGCACAAGATGATGATGATGGTCTGTCTTCTCTGTAGCAGAAGAAAGGAAAA
GGGCTCAGGTTTAAGCGACTGGAATCATTCCTACATGATTCCTGGCGGCAGAAACGTGACAAGGTGCGTC
TCAGACGACTAGAAGTGAAACCTCATGCCTTGGAATTGCCAGATAAACATTCCTTGGCCTTTGTTGTACG
CATCGAAAGGTAAGGAACTGGTGTCTTTCTAATTGCATGAGGCTGGGGCAAAGTGTTGCTTAAGCTTTAG
ACCCCTTTCTAGGGAGATAATATGCCCCAAGCCACTCAGGCAAATTGTGCTAGGATGTCAGGGTTGAGCA
CAATTTAGTCTGCAATATTTGGAAGACCTTAGACAGATAGGCTTGAAAATAAGTGCTATGAGGGTAAAGT
GCTCACTAGGGAGAGGGGTTGAGGACACCCTCTCTAAAGCAGGAACTTCAACCTGAGACCTGAAAGATGT
GAAAGGCGTTCACCAGTGTTGGGAGATTTTTCAGGCATACGTGCTGAAGTCCTGAGGTAGGGAAAGCAAG
GCATCATTCTAGGAACTGAAACAAGGCTGAGTGGATGAAGCATATTCAGTGAAGGGGAGACATTTTTCCT
CATTTAGTGGAACTTTCCCAACCCCCTGCCCACCCCATGTACAACTCTACTTCTTGCTGTTTCCCCTACC
CAATCACCCAAACCAGAAACCTGTGGATTTTGCATGTTTATGAGCTCTGTCCTTTGTAGCCCTCTACCAC
TGCTCATATTTTTCCTGAACTATTGTATTAACCTTCCTCCTGGATTTCCTTGCCTCTAGTGTCATACTGT
GATCTGTCCCATACACTGCCCTTGGTGATTGTCAGAAAGAAATCTGGTCTGGTCTCTTCTGCTTAAAATC
TTCAGTAGCTTTTACTGCCCATAGAAGCACATCCAGCTTCCTTAGCTGGACATGTGTAGACCTACATACC
ACCACTCCGCCTACCCCTGAAACACACACAAGTTCAATTTCCATAGCATTCCAGGCACTGCTCCACATTA
TGAAAAGGATCTGTTTTCATAACCGCCTCCCACTAAACTGAGCTCTTTAAGGCATAGTCTCTGTGTCTTA
TTCCAGATTACCCAGTGTAGTGACCTCGCATGTTGTGCTTGCTGGACTGACATAAACTGGAGGGAGTCTG
TCTGACTTCTGTTGCTGTTCATTTCAGGATTGACGGCGTGAGTTTACTGGTGCAGAGAACCATTGCAAGA
CTTCGCCTAAAGAAAATTTTTAGTGGTGTCTTTGTAAAAGTCACCCCCCAGAATCTAAAAATGCTGCGTA
TAGTGGAACCTTATGTGACCTGGGGGTAAGTAAGGTTTTCCATGTGAATTCACATTAGATTTCTATTTGA
GTGTGTCAGGGTGCACCGGGTATTGCTTTCCAGGGCTCATGTTGCTGTAGAAGGGACATTTTGCTGTGAC
CACAGTCAACCTGAAATCAGTGGGTAGCTGTAATAACCATGGGACACAGGGTAGGGAGGGGTCTGAACAA
TACCATAGTAGGGCTGGTTCAGTCATAGGCTAAGGCTGGGTCAAGGAAAGCTTGGTTCTTGAAAGTCTTA
AAGCAGAGCTAAAGGCAGTGCATGTGTAAGAGTAGTATTCCTGGCCGGACACACTGGCTCATGCCTGTAA
TCCCAACACTTTGGGAGGCCGAGGCGGGTGGATCACACGGTCAGGAGTGGATCACAGGGTCAGGAGATTG
AGACCATCCTGGCCAACATGGTGAAACCCCTGTCTCTACTAAAATACAAAAAAAATTAGCCAGGCATGGT
GATGTGTGCCTGTATTCCCAGCTACTTGGGAGGCTGAGGCAGGAGAATCGCTTGAATCCATGAGGCAGAG
GTTGCAGTGAGCTGAGATTGTGCCACTGCAATCCACTCTGTCTCAAAAAAAAAAAAAAAGGCCAGACACG
GTGGATCACGAGGTCGGGAGATCGAGACCATCCTGGCTAACATGGTGAAACCCCGTCTCTACTAAAAATA
CAAAAAAAATTAGCCTGGCACCTGTAGTCCCAGCTACTTGGGAGGCTGAGGCAGGAGAATGGCATGAACC
TGGGAGGCGGAGCTTGCAGTGAGTCGAGATCGTGCCACTGCACTCCAGCCTGGGAGACTGAGCAAGACTC
CGTCTCAAAAAAAAAAAAAGAGTAGTATTCCTCAAACATTGAAACCCAACAAAAACTTGGATTTTATTTC
CAACTCTTGCACCATCTTGAGTAGAGGGTCACCTAAGGCCAGAGTCGTAGCCCCTAAGGTAAGCTAGGAC
ATGGTTTCTGTTTTGTTTTTGTTGGCAATATTTTCCCTGGTGAACATTTACATCCATAAATTTAAATTTC
TAATTATGTAAGTGGGGTCACTTCAGTTCTTTATCAGGAGTATTTCCAAGCATTTCAGCTGGAATGTGAT
TGCAGAACACTTGCTCGTTGGGAGAAGTGAGTGTGTGGGAGAACCTCTCCAACCTCTCAGCCAGGCTGCA
GGACTGGTATGTAGTGTGCCAGGTGCTGGTGAAAACCGTGCTTTATTTTCCTACATAGATTTCCAAATCT
GAAGTCTGTCCGAGAACTCATTTTGAAACGTGGACAAGCCAAGGTCAAGAATAAGACCATCCCTCTGACA
GACAATACAGTGATTGAGGAGCACCTGGGTGAGTGCTACAGCTTAGGGATCAGCTGGGGCAGAAAGCCAG
GGTCTTTGAAGCTTTGATGTGAGATTCAGGTTGTATTCTTCTTGGGGCCCCAAGAGTCTGCCAGAGTGGC
CAGCTTAGTATATGCTGGATACATGTTAAATAAAGGAATCTGTGCTTTTGTGTTTCTTAGGGAAGTTTGG
CGTCATTTGCTTGGAAGACCTCATTCATGAAATTGCCTTCCCAGGGAAGCATTTCCAGGAGATCTCATGG
TTCTTGTGCCCTTTCCACCTCTCAGTGGCCCGTCATGCTACCAAAAATAGAGTGGGCTTCCTCAAGGAGA
TGGGCACACCTGGCTATCGGGGTGAACGCATCAATCAGCTCATCCGTCAGCTGAACTAGACCCAGGTGAG
GCAGGGCTGAAAACTGCCCTTGGGCTGACTTTTGATAGGCCATGCCTTGCCACTTTACAAGTTCTTTTTG
CATTTACTAGTATTTAAGAGTAACCTTGAGATTGGGAGGAATAGAGGAGGCTGGTACAAATAGATGGAGA
CCTGCTGGGATCAGTGAATGCCTGATTAGGACATGGGGCTATGCATAGCCTAAGAGTTATAGGCTTAAAG
ATGTCGAGTAACTAAAAACTGTATTGCTGGCCGGGCGCGGTGGCTCACGCCTGTAATCCCAGCACTTTGG
GAGGCCAAGGCGGGCAGACCATGAGGTCAGGAGATTGAGACCATCCTGGCCAACATGGTGAAACCCTGTC
TCTACTAAAAATACAAAAATGAGCTGGGTGTGGTGGCGCGTGCCTGTAGTCCCAGCTACTCGAGAGGCTA
AGGCAGGAAAATCGCTTGAACCCAGGAGGCAGAGATTGCAGTGAGCCAAGATTGCACCAGTGCACTCCAG
CTGGGCGACAGAGCGAGACTCCATCTCGGAAAAAAAAAAAAAAAAACTATTGCTGCAGTCATTCAGATGG
AAATGAGGAAAGAATAATATTAATAACTGATTTCAAAAAGGACTTGAAGATGTGAATCATCTATTTTGCT
GAAGAAATCTTAACTCTTTGAAATTACTTTTTATTGCTGTTGTCATACTCTTAGGTGCCAAACTGCGGTA
AATTTTTTATCAGTGAAGTGGAAGCATGTGTTTTGTTTTGGAAATTTTTATCAAGTATCTTCAGAGAAGA
TTATTTCCTGCTTTATCTTCAGAAACTGGAAAGGGTCAAAGAAAAGACAGTAGCTGGCCGGTCGTGGTGG
CTCATGCCTGTAATCCCAACACTTAGGGAGGCTGAGGTGGGCAGATCACCTGAGGTTGGGAGTTCGAGAC
CAGCCTGACCAACATGGAGAAATGCCATCTCTACTAAAAATACAAAAATTAGCCGGGCATGGTGGCACGT
GCCTGTAATCCCAGCTACTCAGGAGGCTGAGGCAGGAGAATCGCTTGAACCTGGGAGGTGGAAGTTGCAG
TGAGCTGAGATCACGCCATTGCACTCCAGCCTGGGCAACAAGCGAAACTCTGTCTCAAAAAAAAAGAAAA
GACAGTAGCATATGTTCATGTCAAGCACCTCTCATCACAGTCGAGTTCCAAGGAAAAATTCCAGTGTTTT
CTGCATTGGGTGCTGTGTCATCTGAAATCGGCACATTCCATGGAGGAAGGAGTCCTGCTTTGTTGCATGT
ATCCTAGGGTTTAATGTTGGTAAATGAGTCACTCTAGCATTTGTAGAAGGCTCCCTGAGACTCCTGCAGC
AGTCGACCAAGCCCAAGGACATAATTGAATCTGGAGAGTCCTGGGGCCTTGTTTTGAAAAAGACTTGAAA
TACACATAGGAAGAAAGGCATAAAAATAAATGTTCACTTGTCTCTGCTGTGAGTATGTGTTCCAACTTTT
CAGTGATGGCTTTGAGAATTCTCAAACTTGACTGGCTCTAAGTGTATCTGGTGGCTTTTGTATCGTAACC
TGAAACTGGCTTAGTACTTTTTCCTAAAAGCTCAGGATTTGAGAATGAGGACCCCTTCGCCAGGAAAACA
TGTATACACTCAAAATTTTGCTTGCAGTTCTAGGGTGTTTAGACCCTTCTCAGATACCTGTGCATCTTAT
GGGTTTTGTTTTTCTCTTTGAGACAGTCTCACCCTGTTGCCCAGGCTGGAGCGCAGTGGCATGATCTCAG
CTCATTGCAGCCTCCACCTCCTGGGTTCAAGTGATTCTGCCTCAGCCCCTTGATCAGCTGGGATTACATG
CATGTACCACCACACCCAGCTAATTCTTGTATTTTTAGTAGAGATGGAGACAGAGTTTCACCATGTAGGC
CAGGCTAGTCTCAAACTCCTGACCTCAAGTGATCCACAAGCCTGGGCCTCCCAAAGTGCTGGGATTACAG
GCATGAGCAACTGCGCCCAGCTCTTGTGTACCTTATGTGAGGAAGTCCTGCTCAATCAGGATCGGTCACG
CAGGCCCTGATCTTGCTACTCTGGTTCCATGTCCTATGGAAGACCAAAGTTTACCAAGATAGATTTTTCC
CTTCATAGTGGCAGATAGTGTTAACCCCTGCACCATCTGTAACTCAGAAATCCCCACCATTTCTTCCCCT
GGGCTTCAGAATAGAATTGCCTGGTTTCTCTGATGATCAGCATGGTTCCTTAAAACCCAAATCAGCAAGG
AATGAACAATTTTGTTTGGCATGGATGAAATTAGCACTGTTTGGCTCGTTAGGCCCCAGGCAGGCAGGCA
CCTTAATTTTTTCCTTGCATATTCTAGTCTTCAGAAGCATTGCCTTTTGTCCTACTGGTAGTGACATAGA
CCAATAACAGGGCATCTGGGGATTTTAATCCTGAAAACAGTGAGTCTGATACTGCTTGTGTTTTTCATCA
GTGTCCACCCCAAGTGGGTCTTCCTGCTATTCTCTTCACTTAGTTGCCCCTCACTTGCCATCTGAGCAAT
TGGCAAGGATGTGCCAGGCCTAGGTTAAACTTGGAAACATGCTTGACCATTCTATTCCCTGGTCCTTTAA
GATCAGTTTGGCTGCAATTTTGGCTCCTTGGACCCTCAAGCATAGCTGGTAAATCAAGTTAGAGATGTAA
CTGCCTTAAAACATGCCAGCTTAGGCTGGGCACGGTGGCTCACACCTGTAATCTCAACACTTCAGGAGGC
TGAGGCAGGCAGATCACTTGAGGTCAGGAGTTCGAGACCAGCCTGACCAACATGGAGAAATTCTGTCCCT
ACTGAAAATACAAAATTAGCCGGATGTGGTGGTGCATGCCTGTAATCCCAGCTACTTGGGAGGCTGAGGC
AAGAGAATTGCTTGAACCCAGGGAGGCAGAGGTTGCAGTGAGCCGAGATCACACCATTGCACTCCACCTT
GGGCAACAAAAGCAAAACTCTGTCTCAAAAAAAAAAAAAAAAAAAGTGCCAGCGTATGAGGTAATTAGAT
TGGTTCTCTCCAGAGGTAACCTGCCAAGAAGAGATGCTATAGATGTTACTCCTATACTGTAAAACATTGT
GAAATCAGATTACTTTAAAATGATGTATTACAAAGTTATGCAAAAAAGCAGTTGTGACTATGGAAGCCCA
AGGCTTATATCCCAGCTCTGTCTTACACTAAATATGGGTACAGTGTTTCCACTCTGTCCATAAAATGGGA
GCTAATATTCTCCAACCTGTGTGCCTGACATGATGGTTAAAGGGATTAAACAAAACAATAGTTTGTAATT
TATTCTGTCAGAGCAAACTGCTGGTAAATAAAAGGGACTAAGTTGACGAAAAATAAATTTTAAAAAACCT
AATAAAACAAGTTTGTAATTTATAATTGTATACAAATAAAAGATGTTACAAAAATTGCGCACTTATATGT
ATGTACCATGACATAACTAATTCGTTGAA
>HS-RPL7A
CTTTCTCTCTCCTCCCGCCGCCCAAGATGGTGAGTGAGCTGTAGTTCCGTGGCACTATAGCCAGGTTCCG
GCTGTATCCGCTGCCATCCTCCTCCAGGCGCGGCCTCGGAGGGCCTCCTGCTCCTCCTGGCGCTAGGAGA
GCCCCACTCGGTGTGGCACGGAGACACCGAGGTGGATTAGAGCCCCACTTGGTGTGGCACGGAGACATTG
AGATGGACTAGAGCCCCGGGCGGCCGAGAGCGGAATGCGTTGTTCCCGGTGTCGCAGGGCTGGGTGTCGC
AGGCCTGGAGCACCGCAGTGCGGGGCTCGGAGCCCTAGCGTCTCTCGGGCTTGCTGGGGGCCGCTCCAGA
GGCCTTGTGAGCGACGAGTTCTGAGCCCGCCCCTGTTGCTTCTAGAGCCTGTGGGGCCGCGACTCAGAGG
AGTCATGAGTCCGGGGTGTCTCCTGGGTGGGCGACGCGAAGAGAGCGTGGTCTCGGGCTTAGCCTTGCTC
TGGCCACTCGGGGTTCCCGGGGCTGCATGCTTGTGCGGCTGAATGTGAGATGCTCCTGTCGAGGGGTGGT
GCTGGGGGGTTGCAGAAAGCTGCTCGCCAGCTTAGTTCAGGCAGGTGCTGTCAGCGTCCCTTGTTTTGGA
GGAGCCAGCCTGAGCCCTACCCCCGACGAAGCGAGTGGAGGCGGCGGTTTAACTGACGTTTTCTTTCTGC
CCAGCCGAAAGGAAAGAAGGCCAAGGGAAAGAAGGTGGCTCCGGCCCCAGCTGTCGTGAAGAAGCAGGAG
GCTAAGAAAGTGGTGAATCCCCTGTTTGAGAAAAGGCCTAAGAATTTTGGCATTGGTAAGTAACAAACGG
CAGAATGAAAACGGTCTATGTTTTTCTCAAGGGAAGGTGGTAATTGGGTTGTGTTGTATCTTGTAGGTTT
TAGTGGGTGTAAAGTGGTCGCAGTCCTTAATTTGTGTCTCTTAGAGACGGGGGCAATGATACATGCTTCT
TGCTTTCATTGGGAGTTGCTGAGCGAGCATTCAGCTCAATATGGTAGTGGCCTTGAATTCAGCTTAGCCA
TCTGGAAACAAGTACAGTAGCAGTGTCGCAGCGAGGTACTAGGACTGCAATTCTGCTGTACTTCGTGGCA
CCTTGGCTTCTTGTTAGATGAGGAAAAGCATCGTGCTCTTTGTTCTCAGGTGTTTGTGTGCAGATGATGT
AAAAGAATATTTGCTATCTGAGAGATGGTGATGACATTTTAAACCACCAAGATCGCTGATGCACCAACAC
CCTTCCTAGTGGCCCCAGACATGAACTTGACATGGAATTTGAGCCTCACTCGGTGTCACCCTTTACTTCT
CAGGACAGGACATCCAGCCCAAAAGAGACCTCACCCGCTTTGTGAAATGGCCCCGCTATATCAGGTTGCA
GCGGCAGAGAGCCATCCTCTATAAGCGGCTGAAAGTGCCTCCTGCGATTAACCAGTTCACCCAGGCCCTG
GACCGCCAAACAGGTGAGGTTCTGTGGCGTGGAAAGGAGTTTCTCAGGCAAGGATTCCTTATTTCATCCA
GAACATGAGGGGGATGGTCTTAGGCTTCTTGAACTGCAGTTGTCATTAAATTATAGTCATATAGCAGGAC
CGCAGTCCAGCATTTGTTATTAAGTGTTAAGTGACAAGGATTAGAACCTTGACTCCAAGCCTAAACTGAA
GAGTGTTTTTCCAGCTACTCAGCTGCTTAAGCTGGCCCACAAGTACAGACCAGAGACAAAGCAAGAGAAG
AAGCAGAGACTGTTGGCCCGGGCCGAGAAGAAGGCTGCTGGCAAAGGGGACGTCCCAACGAAGAGACCAC
CTGTCCTTCGAGCAGGTGAGTAGGCCCCACCTTAGGGTGAACACTGGGGGCGGGCTGTTGCAGTGATGTA
AAATTTCTTGGCCTGAAATTACTGTGAAGAGTAAAACCGAGCTTTTTAACACTGAGTCAGCAGCTGAGCC
CAGCAGCTTCTTGTGACTAGAGCAGGCCCTGTGAGTGCTCACAAAGTGGTTGTGTGTTCTAGGAGTTAAC
ACCGTCACCACCTTGGTGGAGAACAAGAAAGCTCAGCTGGTGGTGATTGCACACGACGTGGATCCCATCG
AGGTGCGTTTGCCTGTTGACTGCTAACCCAAGGGCTTCTGGCAGTACCAGGAAGAGAGAGTAGACCTAAT
GCCAAGTCAGTGATGGGACCGAAGTGGGTGAGGGCAGTACTGACACAGATCCAACACATGCGTGGCTCTT
GCAATGATGTGAATCTCTCACTGAATTCAACCTTGAAGTGCGAATCCATGAGCTTTTTAACCCTGAGCAA
TTGTTACAAGCTAACTGAAATTTGCTGCTTTTGGTCAAAATACAGTCTTCAGCTAATGCTTTCTTCCAGC
TGGTTGTCTTCTTGCCTGCCCTGTGTCGTAAAATGGGGGTCCCTTACTGCATTATCAAGGGAAAGGCAAG
ACTGGGACGTCTAGTCCACAGGAAGACCTGCACCACTGTCGCCTTCACACAGGTGAACTCGTAAGTACAC
AGCCTGGCCCCAAACTTCCCCCCAGTTCATTTAATCCATGCCTCACAGTTGTTTCCTTTTGCCTTAAAGG
CCAATCTTTTAGTTTAAGAAATATATTTATCTGAACTTTTGCCAATGATGGTTAAGAATTTCTTCACCTG
AATAAACCATGTGGTCAGCATTGCATCTGAGGCAAAAGACTGTCTTGAGCTAAAAGGTATTTTTGCATTC
TAAAAGGGAAACTAAGGCAAAAAACCCACTTTTGTTTCCCCTCCTGCCTTTTAGGGAAGACAAAGGCGCT
TTGGCTAAGCTGGTGGAAGCTATCAGGACCAATTACAATGACAGATACGATGAGGTAAGAGGCAGCTTTA
CACCAAAATACTGTCATTCACAAATCTTTCTCCCAAATAACTGGCTGGCTTAACCTATGAGAAGTTCTAT
CTGACGATCAGCTTGGAACAGCCAAACAGAATTAACGCAACTAATAACCTTGAAAATCTCAGAAAACAGT
AAGCCAAGCTAACTGCCTCTTTTTGTCTTTTCAGATCCGCCGTCACTGGGGTGGCAATGTCCTGGGTCCT
AAGTCTGTGGCTCGTATCGCCAAGCTCGAAAAGGCAAAGGCTAAAGAACTTGCCACTAAACTGGGTTAAA
TGTACACTGTTGAGTTTTCTGTACATAAAAATAATTGAAATAATACAAATTTTCCTTCA
>HS-RPL7
AGCCGTCCGCGGAGCCGAGCCGGGTAGCCCCTCTCACACGGCCGTGGCCGCAACCTCAGCCCTCCTCGCA
CCTCCCTTCGCAGCTCACGCCCCCTCCCGTGGGGTGTCCTGGCCTCCGCCTGCCGAGCTCGGCAGTCAGC
AGAGCCCCGGCCATCCTCCTCCGGCCGTCCGGTCCCCACTGGTCCCTGGCTAGCCACTTTTCGTAAGCTA
GAGCACTCCAGACCGCCCCGCCTGCGATCAGGCGCTGCGGAAGACAGCCCTGTGGGCTGGAGCGACGACA
AGGACCTCGCGGAGCGGCGAAAGGGGTGTAGTCTGCGACTACCGCGGCAGGGAGCCGGGAGGGCGGCCAA
AAGTGACTTCGAATTGCAGCTAGCCGTTTGGAACGTGGCCCAAGAGGCTCTCATTTTCCTGGCTGGAACC
GTCGCCGCGGTGCTTGCCTGCGGTCCTGGTCAGCCGTTGCCCTCCCGCCGGGCGGGCGAAGACTGGTGCA
TGCTGGGATTTGTAGTTCGTCCCCATGAGGCTCGTCCTGGGAACATTATGGGGAGGAACGGAGCCTAATC
CTGTCAGCGCAGCCTGGGGATTAGGACCCGGAGTTGCCAAGGTGTCAGCACTCTTTGCTCTTGAATTGAT
TAAAAAGTCTAATCAAATGCATATATTTTCTTCAAACAAGTTTTACCCGAAAGTTTGTTGAAAGAGGCTA
AATCAGGGAGTTCTTTGCGTCTGCAAGGCGGCTTTTTAGTTCTGGATTCTTTTCCGGCTTATTCTAAGAC
ACCTATGAGTCGTGGGGCTTCTCTCGCGAAGTCTTTAAGTGGACAGTACGCATGCGCCAACTTCCTCTTT
TTCCGGCTGGAACCATGGAGGGTGTAGAGTGAGTTGCTTCTGGTCCTCTTGAGAATCCTTCTCCATCTCC
AGAGCCAGATACTTTTTGTGTCACTTTTTCTCTCTCTGGCCGTAGCTTGCACCTTTGCCCACCTCCCTGC
TTGATTGTGAACGCTGTGTGACACCAGTGGGGACCTGAGGCTAGGGTTGGGATGCGGGCGGTCTTAGGAC
GGAGGTTTTGGAGATCCCGGGAACGAGATGTCGGGTTGGAATGTGTGTGGAACCCGTCGGTTGGCTGACG
GCCCAGTCCTCGGTAGAGGGTCTTTCGGGGGAGGCGCAGAACCTCTGAATTGTGTTCGTCCTTGGCTGGT
GCTTGGTACAGGCCTCCCTGCCGCCAGGCCTTTGCTTTCAACATGTGGATCCTGATTGAACCAGAGTGGT
GGTGGCTTGTTTTTTTTTTATTTTTATTTTTTAATTTTTGCGCTTAAAGTCTCGGGGTCAGTGCCTTGCA
GTAGTCTTTCAGCTAGTACATTTTGTTATTCGGGTGTTGGTGTGTTTTTTTTGTTTTTTTTTTTAATTAG
TCGTCGGAGGCCGGGCCTCTTGGTTGAAATAGGGAAAAACGTATTGCTATTGTCATATTTGTGATTGCGT
TTTAGGCAACATGGTGTTAAAGGTTATTGACATGGAGCTAAAATATGCATCGTACACTGTAGCATGCCAG
AGCAAGTAAAGTTACTAGTGACTAAAGTCAGTGACAGCATTTCTGGTAAACAACACTGCTCAGTACGGGA
GTAATACAGCGCTGTGAGCTTTTTGAGCTATTGATAACATTTTTGTTTATTAACGTTAGAGAGAAGAAGA
AGGAGGTTCCTGCTGTGCCAGAAACCCTTAAGAAAAAGCGAAGGAATTTCGCAGAGCTGAAGATCAAGCG
CCTGAGAAAGAAGTTTGCCCAAAAGATGGTAAGTAAACTTTTTGAGGCACTAGCACATAAGGAGGCGCCT
TATTGGGATTGAGGATGAGGTGAATGTTCTTGGCAAGATTTACTTCCTAACTGTACTGAGTAATTGCTTA
GCTACCTAATGTTACAATCTGAAGGTAGTGGGGTTTTTTGGTGGGGGATGTAATTGCATACTGTGGCAAG
AAAAGATTTAAAGGAAACATGTTGTAGTTTTCTTTTTAATGATTGGCATTGCTAATTGTGATTGAGCTAA
AAATTATGAATAACTGATTATTGGTTTTCAGCTTCGAAAGGCAAGGAGGAAGCTTATCTATGAAAAAGCA
AAGCACTATCACAAGGAATATAGGCAGATGTACAGAACTGAAATTCGAATGGCGAGGATGGCAAGAAAAG
CTGGCAACTTCTATGTACCTGCAGAACCCAAATTGGCGTTTGTCATCAGAATCAGAGGGTAAGTTCAGTT
TTACTGCATTCGGGTTTGAATGGGAAAAAAAAAAAAAACCTTCACATTACTTCTGGGAGCCCTGATTCTG
AAACACCGGAGTAACAATATTTTAGGGGAAGCTAGAACAAGGAGGGTGCTGATCACTAATGGTTTAGTTG
CAAGCCATGTTCCCCAAGCTCCTATCCCTTCTCTTAATAGAATACAGAAATTCAGTGTGTAACATGAGAG
GATTCCTATCTGTTTAGGTAGGATTCGATATTCAAAACTATAATGGTTAGTATTAATAAAAATTTCGATG
AAAGGCAAATGCATTTCTGGTCCGTTTTCACCACAGTATCAATGGAGTGAGCCCAAAGGTTCGAAAGGTG
TTGCAGCTTCTTCGCCTTCGTCAAATCTTCAATGGAACCTTTGTGAAGCTCAACAAGGCTTCGATTAACA
TGCTGAGGATTGTAGAGCCATATATTGCATGGGGGTAAGTCTCTTTTCTCCTTTGATTTCTATTTGATAA
ATTGGTTATGTAGCAACATGAATTTTAGATGTTTTAACAGTGGTCACCTTATTTATGTTTGCTTTTTCAC
TTCAGGTACCCCAATCTGAAGTCAGTAAATGAACTAATCTACAAGCGTGGTTATGGCAAAATCAATAAGA
AGCGAATTGCTTTGACAGATAACGCTTTGATTGCTCGATCTCTTGGTAGGTTCTATTTGGGGGAAAATTT
GGTATTAGACCATGCGATAATTTCTTACCCTCTTGTGGCCGTACATTTCTCACTATTGTGAATCTTCATG
TGTTCCCTATGATTCTTGATTTAGCTTAAAAGAAAACGTAAGACATGGTTTCATTAGCTTGAACCTTATC
TTTGTAAAGCCATGCATTTACCTTGTTTATTCCTGGTTATGTTTTCATCTCACAGCCTATTCAAAAAGAT
TTTGAATAATTATTTCAAAACTTTTTGCAACTTTAATAATCTTAAATAACCTTAAAATATTTAGGTAAAT
ACGGCATCATCTGCATGGAGGATTTGATTCATGAGATCTATACTGTTGGAAAACGCTTCAAAGAGGCAAA
TAACTTCCTGTGGCCCTTCAAATTGTCTTCTCCACGAGGTGGAATGAAGAAAAAGACCACCCATTTTGTA
GAAGGTGGAGATGCTGGCAACAGGGAGGACCAGATCAACAGGCTTATTAGAAGAATGAACTAAGGTGAGA
GACCTCATCCTGAGAAAGGTTGAGTTAATGTTAGAGTATAAGTGGTGGTAATCTTGAATACTTTTCCCAT
TAAATATTGATGGGGGTTTGAATTTTAATCAGTGCTTTTGTGGGGAGTGGGGGTCAACTATCTTAATGAT
TACAGTTGGTTTGTTTACTGCTTTTGAGGACCTTTCTGGAGGAAAGGAAAAGCCTGTTTTGGGGAGTCTT
TAAAGATGGAAATTGGGTGGTCTTAAAAATGTAAACTCAATCATTACTTTATAACTGCCTAGTTTATGTT
AATTGTTAGCTGCCTAAAGTGTTTTCTAATGGTTTTCTTTTTTCCTTTCAGGTGTCTACCATGATTATTT
TTCTAAGCTGGTTGGTTAATAAACAGTACCTGCTCTCAAATTGAAATATATTGTTGTATTTGTGATTTGT
TGTTGTTGTTGTTAGCCTGCCTCTGTCTTCCCTTAACTACTGTGGCAAGTGTGGTGTGTGATAAAATTAA
GCCAAATCAACAGCCCATTTCGTGCAAAATCAGGGTCGAGTCTGTGTGAAAGACATCTCTTGGGTTTTTA
AAAGGCTTTTCTATACAAAAGATTTTAATTTTTTGTTTTTTAACTGTGCTGAGTGATTCGAAATGGGTTT
ATTCTAAGAAAGCCTGTTTCACAAGCATTTGTACATGATTTGTCGGTAAGGTAATCCAACTTTGGTTTAT
GGAAAAAATTGAATTTAGTTGCTAAAATTTATTTCTCGGGCCTTCGCTTGTTTATAAACTGCCATGTAAA
TGTGTTGTTTTCCTTTTGCATTCCA
>AT-RPL7A
GTAAGGCCTTACATAAGCCCATAAATATTGGGCTTTTTTAGCCCAATAGTATTATGAGTCTGGCCCGGAG
CGTAATTAGGTCTGGTGGCAAAGTTGTTAATAACACAAAAGAGATTTTAGTTAATAAACCCTAGGCTTCT
CAAATCGGCCATTGCTACCAACTTCGACTTGGAATTCTTTCAGCCGCCGTCCCAATTGCTTTGCCGCCAC
CGGTAAATTTGTTCCCCCTTTTCCGTTCTTCTTATCTTGTTCATTCTGTTGGTGTCCCTATAGCCTCACT
TTCTTATAGGGTTGAGTTCAGTCTCTGTTTATAAACTTTTTTCGCAAAAAAATTCAATCTGACAATCTGT
TTTGTGTTGTAGAAGCAAAGAGTAGAGAGATAATGGCTGAGGAAGAAGCTAAGGGTTTGGATTACATACC
GGAGATAGTACTGAAGAAGAGGAAGAACAGAGATGAGCTTGCCTTTATCAGGAAGAAGCAACTTGAGTTG
GGTAATTCCGGCAAGAAGAAGAAGAAAGTCTCTGATATCAAACGTCCTGAAGATTTTGTTCATGAGTTCA
GGGCTAAGGTACACTTCTTTTTTTCCAGATTCTCTGAAAAACTTTTGCTTTGTCTTTTTCCATTCGTTTT
ACTGCCTCAAGTTCTGATTTTTGCTTCTTGACTTTTGTCTACACCTTAGAAGAACTTGTTTTTGCTTATT
CTTTGAGTTAAATTAAAGCTATACATCAACCTTTATGATTAGGTTTTGTCACTTATCTCTTAGACTGTAA
CTTTTCTACAGATAATTTTGTGTTTCTCCTTTGAGATTTCTCCCTAGTTTTGCAAGGTTGTGCTTAGGAC
TTGTTGTTTCTTCTGTCAATCCTGCATTGTTCTCTGTAATTTAACTGTTCCCTTTTTGCTAATTTTATCC
CTACTTAAGGAAGTAGATATGATCCGGATGAAGCAAAGAGTAAAGAGGCCAAAGTCATCTCCTCCACCAG
TTAAATCTGACCTGGTTTTCATCATACGCATTCAAGGGTATTTGATATTCTCCAATTAGCTTTGTTTTCC
CCCTGGAGTTTTAATCTTTATCTCTGCCTGTTTCTTATCCTTGCCTTTTCTTTCTGGTGACCAGCAAGAA
TGATATGCACCCAAAGACCAAGAGGATTCTTAACAATTTGCAACTAAAGAGCGTCTTTACTGGTGTATTT
GCTAAAGCAACTGACAGTTTGTTCCAAAAGCTTCTCAAAGTGCAGCCTTATGTCACTTATGGGTACGTAG
AGACAATCAATCCTCTTTCAATATTTCCTTGTTACTCGATTTCCATGCTGTTTCTCTATTCTCGTATGAG
CTAACCGATGTTTACGATTCTTGAAGATACCCGAATGATAAGAGTGTTAAGGACCTTATATACAAAAAGG
GATGCACAATCATTGAGGGAAATCCTGTTCCTCTTACCGACAACAATATAATCGAACAGGTAAAATTTCC
TACTCTTAAAAGTATAGGAGCTTATTCCAGATAATAACCATGCTGTTCTTAATCGTTTCCACTTTTGTTA
CCTTAGGCTCTAGGAGAACACAAAATCTTGGGCATAGAAGACCTTGTGAATGAGATAGCAAGAGTCGGAG
ATCATTTCAGAGAAGTTATGAGATTCTTGGGACCCTTGAAACTCAACAAGCCTGTGGCTGATGTTTTGCA
CCGGAAGAAACAAGTTTTCAGCGAAGGAGGAGATACCGGAAACCGCGAAGATAAGATCAATGATCTCATC
AGCAAAATGAATTAGAAGCAGCAATCGTTGTAATCGCTAGCTACTTACTATATTTTCCTTAAAAGATCTG
TACGAGGCTAAAAACCAACCATTTTGATGAAACACTTGCAATTTTGGTTAAAGGGCATTCCAAATTTTAT
AAGCA
>AT-RPL7B
TTTAGTTAACCTAATTTGAGAAGCATATATATAAAACTCACATCGCCGCTGATAATTCCGCCTCTGAGAA
ATTGCGTTCGATTACAGCTCCACAGAGGTTAGTGTCGTCGAGTCTCTTCTCTCCACTCATCATCTATCGA
TTTATCGTCGTTAATCATTGAATCTGGGTTGTTGATCTGCAGGATTCGGAAATGGTTGAGTCAAAGGTTG
TAGTTCCAGAGTCGGTGTTGAAGAAGAGGAAGAGAGAGGAGGAATGGGCTTTGGAGAAGAAGCAGAATGT
TGAAGCCGCCAAGAAGAAGAACGCCGAGAACAGGAAGCTTATCTTCAAAAGAGCCGAGCAATACTCCAAG
GAATATGCCGAGAAGGTAAACATTTTTATCCTCCAAATACAAATACTTGGAAACTGTAGTTGATCTTCTC
TTTTATCCTTGATAGGAGAAGGAGTTGATCTCGTTGAAACGCGAGGCCAAGCTTAAGGGAGGTTTCTATG
TTGACCCTGAAGCTAAGCTCTTGTTCATCATCCGTATCCGTGGGTATGTTATACTGTTGTTGTTTGTCTT
ATAAGCATTTCTAAAGCCAGTGTCTATGTTGTTGTTCTTATCTGTTGTTCTTTTTAATATTGCAGTATCA
ATGCCATTGACCCTAAGACTAAGAAGATTCTCCAGCTCTTGCGTTTGAGACAGGTTCGTGTATTATTGTG
TTTGTGTAGATTAGTCTTTTGATGAATTGGCATAAACTGCTAGGTTGTTTCAATACAATGTTGTTATTAG
TCTTAGGTTAGGTCTTGAAAGTTGGAATCTTTCCATGTAATTTGTTGATAATCAGTTGGTTTGATAATGT
CACATTTCATGGCAAAGACTAGTATATGAAATGATTCTATCAGTGTTGTATACTGATTGATTTTGGCATT
GTGTAATGCAGATTTTCAATGGTGTTTTCCTTAAAGTCAACAAGGCTACGATGAACATGCTTCGCCGTGT
TGAGCCCTATGTCACTTACGGGTATGTATATACACTCTCATCCTAAACCCTTTAATCTGATGCTATGAGA
TAACAAGAGTCTTGAAGAGTGTGACTTTTCTCTTCTGTTTTTCAGATTCCCTAACTTGAAGAGTGTCAAG
GAATTGATCTACAAGAGAGGTTACGGAAAGCTTAACCACCAGAGGATAGCTTTGACTGACAACTCTATTG
TAGAGCAGGTTTGAGATCTGTCTCTCTGTGGCTCTTGCTTCTTTAGTTTTGTTCTGATATCAAGTTTAAG
ACTCACGAATTCTTCTTCCATACAAAACCAAAATCAGGCTCTTGGAAAGCATGGTATCATTTGCACTGAG
GATTTGATCCACGAGATTCTAACAGTAGGACCTCATTTCAAGGAAGCCAACAACTTCCTTTGGCCATTCC
AGCTTAAGGCACCACTAGGTGGCCTCAAGAAGAAGAGAAATCACTACGTGGAAGGTGGTGATGCCGGAAA
CCGTGAGAACTTCATCAATGAGCTTATCAGGAGGATGAATTAGAATGTTATCGTTTTCAATGTCAAACTT
CTCTGCGTTTTCATTATGTGCCTCCTCCTGGATTTTGATCTTCTTTCTCAAGTTAAAAGACATTTTGAAT
CTTCTCTTTTGTTCTCTTTGGATCTTAATTTGTGCTTTGATTACTGCAAGTGATTCTACATTTCTCTTTA
ATAGGATTTTTAAGAAACTGTTTCTTCAAAATCTCTTTACCTGGACAATTTCAAAATGGTTGCCTTCATT
TTGTTGACGAATTCATTGTTTGTTTGGAGTAAAACAAGGATCACTTTGTATGAAGGTTTATTTTTGTTCA
TTAAATTGGAGCAATGTATTTTTTTTGTTAATTTGTGGCCCATTGGATTAAGTAATCC
>AT-RPL7C
AGACAATAAGACATACGAAGCTTTAAAACTCTATTGTTTTGAATGATCACAATGTCACATATCAATACTT
ATATTCGATCTAGAAGATTTGGAAGAGTATAGATTTAATTTGTTGGTTTATGAAAAGAAAAACAGTATTG
GTGGAAGAAAGTATTCAGAAGGGCAAAATCGATGACATGTAGATGTAGATGGACAAGGCCTGAGTATGTA
TATGTCATTTAAAACCAAGCCCAATTTAAGTTAAATAAATAGGCCCACTTTGGAAAAATGACTGCTGACT
AAAAAATTAGGGTTACGAAATAAACCCTAAACCCAGTTTCGACTTTGTTTGTTTTGTCCTCCTTCTACGC
CGCACACTATCTCTTCCTCTCTCTCAGACGAGATTTCCTCTTCATCTCAAGTAAGCTTCTCTCTTTGATC
TTCTTCGTTTAGTTTAGTTTTTAATCGTAAGTTTTCTTTTGATTCATTATAATTTGTTTGTTCTGATGTT
TGTGAGATCGATAAACCCAGTTGTTCTAGTTCTATTGTAGAGAAATTCACTTTGATTTTAGATTTAGAAT
CGTTGCATTGAGTTTTCCGATCTTCTATAATTGCTCCTTTTCATTTTGCTGTTTGGTTTTAAACATTGTC
GTTGATGTTCCTGCCTTGCTTCTCTGTGATTAACAATCTGTTCAATTTCTCAAAGGTGTCTTTTTTATTT
GATTAGTATAGCTTATTTTTGGTTTGTTTATGGCATGCTATGTATGTAGGAGAAATGGCTGAATCCAAGG
TAGTGGTTCCAGAGTCTGTGCTAAAGAAGATCAAGAGGCAAGAGGAATGGGCATTGGCCAAGAAAGATGA
AGCTGTAGCTGCTAAGAAGAAGAGTGTTGAGGCCCGCAAGCTTATCTTCAAGAGAGCTGAGCAGTATGCC
AAAGAATACGCTGAGAAGGTAATAAAGCAACACTCTTTTGTTCATCTTTGCTGACTAAGATGACTGTTCT
GTTCATGGTTGTTGTAATGAATCATGATATATTATTTGCATGCTTGTTTAGGATAACGAGTTGATCCGAT
TGAAGCGGGAGGCTAAGTTGAAAGGAGGTTTCTACGTTGACCCTGAGGCTAAGTTGCTCTTTATCATTCG
TATCCGTGGGTATGTGCCTATTATTTGTGTGTTACATAAGTTGTTGCATATAGATTCTGTTTTTTATTTA
CGTGATTGTTTGTCATTTGCAGTATCAATGCCATTGACCCAAAAACCAAGAAGATTCTGCAGCTCCTGCG
TTTGAGACAGGTAGGTTTCACAGTTTGTTATTTTCATCCAGCTATATTAGCCTAACATATGATTATTGAT
TAATATTTGTTATATGTTCAAACTAATATGTGATAGTTGCCTGTTCATCATTTTTAAAAGAGAGTAGAAG
ACTATTGCGTTGTCAAGAAGTTTACTTTCGTATACATTTGTGCAGATCTTCAATGGTGTGTTTCTTAAGG
TGAACAAGGCAACAGTAAACATGCTGCGCCGAGTTGAACCATACGTGACTTACGGGTATGCAATCTGATT
CTCTCTCTTTCAATAGGATTATGTAAACTAAACTATATGCTGCTCTAAACCGAATGATATATCTGGTGCA
GATACCCAAACTTGAAGAGCGTTAAGGAACTGATCTACAAAAGAGGTTATGGAAAGCTGAACCACCAGAG
GATAGCACTTACTGACAACTCCATTGTGGATCAGGCTCTCGGAAAGCATGGGATCATCTGCGTTGAGGAT
CTCATCCACGAGATCATGACTGTTGGACCTCACTTCAAGGAAGCCAACAACTTCCTGTGGCCATTCCAAT
TGAAGGCACCACTCGGTGGCCTTAAGAAGAAGAGAAACCACTACGTCGAAGGTGGTGATGCTGGAAACAG
GGAGAATTTCATCAACGAGCTTGTCAGGAGAATGAATTGATGAAAGCTTCCTTCTTTATCTTTGCAAATT
TCAAAGATTTTGGGACCGAGTTTTTTTTTTTTTGTTCAAGTTATCAGAGACTTGTGATCTTTTATCCGAG
ATAGGCTTTTTATGACTAATCATGTTATTTTCCAATGGCGGGCTTTTAAATTGATCTTGAATTTTTATTG
GCTGTTAGATTGTTCCTTCGAAGCCCACCAATCCATTAGAAATATCTGGTTTTGACCGGTTGATTAAATA
ATTCCGGTCGAGCTGTATCAAAGATAGAATGCTCTTAACCGGAATCGTTGACTTCAAGAGTACAAGCTGT
TCTCCATTTTTTTAAAGAGATTATATCGGTTGTGCGAAATTGTCCAAATTTTGTTTTTATAGATTGACCG
ATCAAATATTGTAGCGG
>AT-RPL7D
ATAACGAAGCCCTAGTCCAAAAATTTCTCATACTATAAAATGATTTTTTTTTTTGCTTCGCTCCCTCTTT
TTCACTTCGTTAACGGCCCCGCCTCCACTCTATCCTACCGCCGACGTCCGTGATCGCCGGTTAGTCTTCT
TCTTTCTCTTCGCCCTCTCAACATACATCGTTGCAGAAATCAATCGTGTTTCGAGCTGCGCGATTGCATT
GGTCAGGTTTAGGAAAGCTATGTGTGTTTTGGTAGTGGTTCGGCTTTATTTGGCCTAAACAAATCTAGCT
ATTGGTTCAGAAGAAGGTGGAATCCTGAGAAAGCTCTCTAAACAACGCATGTGATCTAGCAATTGGATTA
CTTTACAAAAATTAAGAGTCTTTAAGGTGCATAACCTGTGTGATAGAATGTAATTGGATCTATGACTTGT
GGACCATTTCCTAGGTTTTTTAAAAGATTTTTTCTGATATGTATGACAACAGACACGAGGATTATGCTAG
TAATTGCCTGAAAGTATTGATTTTTGGAGCCTAAAACCTTTTGTATCATTTTGGTGAAAGGTTATGTTTC
ACTCGTGTAACACAATTCCATTTCACTTGTTACATTTTTATATATGTTTTCACTTGCATTATCTAAGAAG
CTGGAATTCTTGCTTTGATTTTATTAGCAGTAGCATCTAATTTTGTTTGTTTTTCAGTTTCTCTCTTCAG
GAAAAGTGTAGTTAAACGATTGAGTATTCCAATTTTGTTCTTTGGCTATGTAATTTACAGAAATGACTGA
AGCAGAGTCCAAGACTGTTGTTCCTGAGTCAGTGTTGAAGAAGAGAAAGAGGGAGGAAGAATGGGCACTT
GCCAAGAAACAGGAGCTTGAGGCTGCCAAAAAGCAGAATGCTGAGAAGAGGAAACTCATATTTAACCGGG
CTAAACAGTACTCCAAGGAGTACCAGGAGAAAGTATTTTTCTACAAGCTTAGTTTGCAATTTTTTCTAAT
GTGAGAAATGCAAATTCATTGAGCGTTTCTGCTACTTGTTTTCTTCAGGAAAGGGAATTAATCCAGCTGA
AGCGTGAGGCAAAATTGAAAGGAGGCTTTTATGTTGACCCAGAAGCTAAACTGCTTTTCATTATCCGTAT
CCGTGGGTAATATGATCTACTATTACTATCTCCCAAGTATAAGGATGATGTGTTACTTCTATAACTGTTT
TCTCATTTTTCTATCTATTTGTTTCTATCATCAGTATCAATGCCATTGACCCAAAGACAAAGAAGATTTT
GCAACTTTTGCGTTTAAGACAGGTAACAATCTTATGATGAGAACTTTGTAATATGTTAACCAATGATACA
AAAGGATCGTATCTGACACTTAAAATCATTTATTGCAGATTTTCAATGGTGTGTTCTTGAAGGTCAACAA
GGCAACCATTAACATGCTTCGCCGTGTTGAACCCTATGTAACCTATGGGTACCCCTCTTCGTGCTTACAT
TTCAAAACTTTCTTTTCTTATTTAACCTCATTAGTAAGTGGTAGTCTTACCATGGACGACTCTTGTTTTC
CTCAGATACCCGAACTTAAAAAGTGTGAAGGAATTGATTTACAAACGAGGTTTTGGAAAGCTTAACCACC
AGAGGACTGCCTTAACAGACAATTCTATTGTAGATCAGGTGCATATCATCAACCTATCTCCTTCATCAAG
TCTGGTTCAGTTCCTAAAGTCAATATTATTGCCGTTATCCCTGTCCTAGAAAAAATGATGTATTATCATC
AATGTTGGATTCAATTTGTCTAACAGATATGGATTGTCATTTATCATCAAAACTCTATGTCTTCTCTATA
TTTACATATCCTTTGCTGTTGAATCAGGGGCTAGGAAAGCATGGCATCATCTGCGTTGAGGATCTGATCC
ATGAGATCATGACGGTTGGGCCACATTTCAAGGAAGCCAATAACTTTTTGTGGCCATTCCAGTTGAAGGC
TCCATTGGGAGGGATGAAGAAGAAGAGGAACCATTACGTGGAAGGAGGAGATGCTGGAAACCGCGAGAAC
TTCATCAACGAGCTCGTTAGGAGAATGAACTGAAGCGTAAGCGTTATTGCTCTGAAACTCCCTAGGAAAC
GTTTTGCTATAGGTGGAAAACTTCTGTTCGCTTGCTTGTGTTGCCATTGAGGCGAAGTAAACATTTACGG
TGAAAGACTTTGATATTTTATAAGTTTGAAATTGTAAGAACACATCATTTATTTCCTTCCACATTACATC
GTCACTTGCATTGCATTTT
>SC-RPL7A
ATGGCCGCTGAGTATGTATACGAAATCGTCTATTTTATTACTATTTCCTAAAGTATCCAGAGAAGTATAC
TAGTTTCCGCAAGTTACGTTGAGAAAAAGGAGCAATTCTGCTCTAATAGCATTTGCACTCACACTTACAT
TTATCTTCAACTTGTGACTATTCACAAGATGATTTTCCGTAGGGGATTACCTTCACAGGGTCAAAGACAA
TTTTAGTTGATGAATTTGAGGAAAAATTTGAAATATCTTGATTGTTGCCAAAAATTTCATCGCCGACCTT
GATTAGAATATTTTCTCAAATTTTCATTTCCTAAGTGTCTCTGTTTCACTCCCTTCATTCGAATGAAAAG
TGGTGTTTTCAATTCGATGTAACTTCGTAGAAAAAAGTTTTACTTGATGGTCATACAAACCTAATTCATT
CTATTTTCGGTTATGCTAACAAAAATATTTTATTATTTGTATTATTACAGAAAAATCTTGACCCCAGAAT
CTCAGTTGAAGAAGTCTAAGGCTCAACAAAAGACTGCTGAACAAGTCGCTGCTGAAAGAGCTGCTCGTAA
GGCTGTATGTTAAACTTTTGCTTACATTTATATTTTATGCTGCAACACATTTTCTTACTGGGATATATGT
GAGTTCACGTGCGTCGCCAATTTTGATAAGTATCATTCGAACAGTTGCAATATTCTCAACACCTGTGGTA
TCATTAGGCTAATGGACTATTTGTTACGTTCTGTTTGTTTTCTCATTTTATGATGAAAATCCATTGTATC
CCAATACATATTCGACTAGTCATTGACGATGCTGTCGTAACTTATCACCATCTTTCGACTGATTATAAGA
AAAGAAATAGAAAGTAAAATAGACCAGAGAGTTAAGGTATTAAGGTTACAATTATTGCCGTGTTTCCAGT
GTCAGAAAAACCATTGAGTGATAATGCCGTGTAACAATTTTTAGCATAAAATACTGTGTTTTCCATCTGG
TATTTTTTTACTAACATCAATTTACTGTTTTTTACTTTTTATTTTCATTTAGGCTAACAAGGAAAAGAGA
GCCATTATTTTGGAAAGAAACGCCGCTTACCAAAAGGAATACGAAACTGCTGAAAGAAACATCATTCAAG
CTAAGCGTGATGCCAAGGCTGCTGGTTCCTACTACGTCGAAGCTCAACACAAGTTGGTCTTCGTTGTCAG
AATCAAGGGTATTAACAAGATCCCACCTAAGCCAAGAAAGGTTCTACAATTGCTAAGATTGACAAGAATC
AACTCTGGTACATTCGTCAAAGTTACCAAGGCTACTTTGGAACTATTGAAGTTGATTGAACCATACGTTG
CTTACGGTTACCCATCGTACTCTACTATTAGACAATTGGTCTACAAGAGAGGTTTCGGTAAGATCAACAA
GCAAAGAGTTCCATTGTCCGACAATGCTATCATCGAAGCCAACTTGGGTAAGTATGGTATCTTGTCCATT
GACGATTTGATTCACGAAATCATCACTGTTGGTCCACACTTCAAGCAAGCTAACAACTTTTTGTGGCCAT
TCAAGTTGTCCAACCCATCTGGTGGTTGGGGTGTCCCAAGAAAGTTCAAGCACTTTATCCAAGGTGGTTC
TTTCGGTAACCGTGAAGAATTCATCAACAAATTGGTTAAGTCCATGAACTAA
>SC-RPL7B
ATGTCCACTGAGTATGTCAAAAACTACAAATACGACCTTATTTGGTAACTAGTTTGTTGTCGGTTACATC
TGAATTTGAAGTACCCAAATTGATAATACTTCAGGAAAAGTTAACGCACATTCAAAACGTGTTTTTTTAC
AATAACCTATGGTGATCGAACCTAATTATAAAAAGAAGCACTTGAAGTAGTTTATCTTCTTCAAGTACCT
TTCGTAGGGGATTTTCATTTTTAATGAACAAAGGCATTGTTTGTTAGTATCTATTACTTGTAATACACCG
ATAATTTCATTGATAGATATTTCCAGCATGTCTCTGCATCTCCCTTCCATCGAATGAAAAGTGGTGTTTT
CAATTCGATGTAACTGAATCTTTGTTCTTAATATGACTTCTTTGCTAACATTTTTTTCATTTTTGAATAG
AAAAATCTTGACTCCTGAATCTCAATTGAAGAAGACTAAAGCTCAACAAAAGACTGCAGAACAAATTGCT
GCAGAGAGAGCTGCCCGTAAAGCCGTATGTTCATTTACCATGTTTGAAAGATATTATATCATTCCTTTTA
CAGTGAGTTCACAAAAATATAATACTTTGTTAAAGAGATCTTTTCTCGGTTTTACATTTCCTTGGCATTT
GTTAGTCGCGAACAATTTTCACTTTTTGCAACGTTTTTTTTCTTTCTTAATGATGAAAACTATTCCTTAT
TCTCGACTAGTCTTTGACAATGCTGTCGTTTAATCACCATCTTTCGGCTGACTAGTAAAGAAAATGCAAG
AGTGAGAATATGCCAAGAATCTGCAAGATTGAGTTAAGTTTTCTTAGAAAGTTTTATCGTGCATATTTTT
CACTAAATTGGAATGACGTTAAAACCAAAAGTACTGATCTTACTAACATTAATCAAAAATTCTTGATGAA
TATTATTTTAGGCTAACAAGGAAAAAAGAGCTATTATTTTGGAAAGAAACGCCGCTTACCAAAAGGAATA
CGAAACTGCTGAAAGAAACATCATTCAAGCTAAGCGTGATGCCAAGGCTGCTGGTTCCTACTACGTCGAA
GCTCAACACAAGTTGGTCTTCGTTGTCAGAATCAAGGGTATTAACAAGATTCCACCTAAGCCAAGAAAGG
TTCTACAATTGCTAAGATTGACAAGAATCAACTCTGGTACATTCGTCAAAGTTACCAAGGCTACTTTGGA
ACTATTGAAGTTGATTGAACCATACGTTGCTTACGGTTACCCATCCTACTCTACTATTAGACAATTGGTC
TACAAGAGAGGTTTCGGTAAGATCAACAAGCAAAGAGTTCCATTGTCCGACAATGCTATCATCGAAGCCA
ACTTGGGTAAGTATGGTATCTTGTCCATTGACGATTTGATTCACGAAATCATCACTGTTGGTCCACACTT
CAAGCAAGCTAACAACTTTTTGTGGCCATTCAAGTTGTCCAACCCATCTGGTGGTTGGGGTGTCCCAAGA
AAGTTCAAGCATTTCATCCAAGGTGGTTCTTTCGGTAACCGTGAAGAATTCATCAATAAATTGGTTAAGG
CTATGAACTAA

## Sheet: 7B (JModelTest Results)
JModelTest Results
ID	Name	Partition	-InL	p	AICc	delaAICc	weight	cumWeight
46	TPM3uf+I	12012	66863037	22	134174169	0.0	0.4173	0.4173	13424232
70	TIM3+I	12032	66862897	23	134194633	20463	0.15	0.5674
48	TPM3uf+I+G	12012	66863689	23	134196218	22049	0.1386	0.7059
78	TVM+I	12314	66854946	24	134199506	25337	0.1176	0.8235
72	TIM3+I+G	12032	66863541	24	134216697	42527	0.0498	0.8733
86	GTR+I	12345	66854833	25	134220091	45922	0.042	0.9153
80	TVM+I+G	12314	66855648	25	134221721	47552	0.0387	0.954
88	GTR+I+G	12345	66855526	26	13424232	68151	0.0138	0.9678
47	TPM3uf+G	12012	66903636	22	134255367	81198	0.0072	0.975
42	TPM3+I	12012	66936846	19	134259757	85588	0.0058	0.9808
66	TIM3ef+I	12032	66928025	20	134262759	88589	0.005	0.9858
71	TIM3+G	12032	66902664	23	134274166	99997	0.0028	0.9886
79	TVM+G	12314	66895986	24	134281588	107419	0.0019	0.9906
44	TPM3+I+G	12012	66937729	20	134282167	107997	0.0019	0.9924
68	TIM3ef+I+G	12032	66928763	21	134284912	110743	0.0016	0.9941
ID	Name	Partition	-InL	p	BIC	delaBIC	weight	cumWeight
42	TPM3+I	12012	66936846	19	135232027	0.0	0.8445	0.8445
66	TIM3ef+I	12032	66928025	20	135285876	53849	0.0572	0.9017
46	TPM3uf+I	12012	66863037	22	135298882	66855	0.0298	0.9315
41	TPM3	12012	67007239	18	135301321	69295	0.0264	0.9579
44	TPM3+I+G	12012	66937729	20	135305284	73257	0.0217	0.9796
43	TPM3+G	12012	66980602	19	135319538	87511	0.0106	0.9902
65	TIM3ef	12032	66994281	19	135346898	114871	0.0027	0.9929
68	TIM3ef+I+G	12032	66928763	21	135358844	126817	0.0015	0.9944
74	TVMef+I	12314	66931552	21	135364422	132395	0.0011	0.9955
67	TIM3ef+G	12032	66967544	20	135364914	132887	0.0011	0.9966
45	TPM3uf	12012	6693336	21	135368037	13601	9.0E-4	0.9976
70	TIM3+I	12032	66862897	23	135370094	138067	8.0E-4	0.9984
48	TPM3uf+I+G	12012	66863689	23	135371679	139652	8.0E-4	0.9992
47	TPM3uf+G	12012	66903636	22	13538008	148054	5.0E-4	0.9997
82	SYM+I	12345	66922968	22	135418744	186717	1.0E-4	0.9998

## Sheet: 7C (TRACER Results)
TRACER values
Statistic	Mean	ESS	Type
posterior	-6715597	777	R
likelihood	-6698099	1258	R
prior	-17498	369	R
treeLikelihood	-6698099	1258	R
TreeHeight	0.89	477	R
YuleModel	-3239	389	R
birthRate	2228	1040	R
freqParameter.1	0.281	432	R
freqParameter.2	0.243	411	R
freqParameter.3	0.247	469	R
freqParameter.4	0.229	398	R
rateAC	0.557	429	R
rateAG	1018	335	R
rateAT	0.302	533	R
rateCG	0.668	555	R
rateGT	0.278	413	R
proportionInvariant	38.01	1116	R
ucldStdev	0.781	389	R
rate.mean	0.962	350	R
rate.variance	0.657	462	R
rate.coefficientOfVariation	0.764	464	R
