# Supplementary material for: Spatially Enriched Paralog Rearrangements Argue Functionally Diverse Ribosomes Arise during Cold Acclimation in Arabidopsis
Source: Int J Mol Sci. 2021 Jun 7;22(11):6160. doi: 10.3390/ijms22116160 (PMC8201131; doi:10.3390/ijms22116160)
Supplement: Supplementary file 1 [file ijms-22-06160-s001.zip › Table S8.xlsx]

## Sheet: Table S8
Table S8. Ribosome biogenesis factors (RBF) following expression patterns associated with Figure S3. Genes were assessed as described in Table S2B. RBFs that were not confirmed in literature were listed based on GO terms (*, GO ID not shown).
	ID	TAIR Description	Aliases	Function	Citation	DOI	DOI_2
1 day	AT4G28450	WD repeat and SOF domain-containing protein 1;(source:Araport11)	SOF1-like	ortholog of yeast SOF1; maturation of SSU-rRNA from tricistronic rRNA transcript (SSU-rRNA, 5.8S rRNA, LSU-rRNA)	Bax et al, 2006	doi: 10.1128/EC.5.3.427-434.2006
	AT5G53930	transcriptional regulator ATRX-like protein;(source:Araport11)	ATRX-like	Modulates H3, rDNA 45S loci transcription regulator	Duc et al, 2017	doi: 10.1105/tpc.16.00877
	AT1G31660	bystin-like protein;(source:Araport11)	atENP1, ENP1	Required for processing of 20S pre-rRNA precursor and biogenesis of 40S ribosomal subunits .	Missbach et al, 2013	doi.org/10.1371/journal.pone.0054084
	AT1G51380	DEA(D/H)-box RNA helicase family protein;(source:Araport11)	RH34	ATP-dependent RNA helicase involved in 40S ribosomal subunit biogenesis. Required for the processing and cleavage of 35S pre-rRNA at sites A0, A1, and A2, leading to mature 18S rRNA.	Mingam et al, 2004	doi.org/10.1111/j.1467-7652.2004.00084.x
	AT1G63810	nucleolar protein;(source:Araport11)	UTP22, NOL6	ortholog of U3 small nucleolar RNA-associated protein 22 (UTP22, NOL6); rRNA processing and nuclear tRNA export	Micol-Ponce et al, 2018	doi: 10.1105/tpc.18.00245
	AT1G77030	putative DEAD-box ATP-dependent RNA helicase 29;(source:Araport11)	RH29	ortholog of yeast Dbp10p; constituent of 66S pre-ribosomal particles; essential protein involved in ribosome biogenesis	Chen et al, 2020	doi.org/10.1093/jxb/eraa190
	AT2G25355	PNAS-3-like protein;(source:Araport11)	RRP40A	exosome complex component RRP40 (RRP40, EXOSC3); exonucleolytic trimming to generate mature 3'-end of 5.8S rRNA from tricistronic rRNA transcript (SSU-rRNA, 5.8S rRNA, LSU-rRNA)	Oddone et al, 2007	doi: 10.1038/sj.embor.7400856
	AT3G09720	P-loop containing nucleoside triphosphate hydrolases superfamily protein;(source:Araport11)	AtRH57, RH57	AtRH57 plays an important role in rRNA biogenesis in Arabidopsis and participates in response to sugar involving glucose (Glc)-and abscisic acid (ABA) signaling during germination and seedling growth.	Sáez-Vásquez et al, 2019	doi.org/10.1105/tpc.18.00874
	AT3G11964	RIBOSOMAL RNA PROCESSING 5;(source:Araport11)	RRP5	rRNA processing	Missbach et al, 2013	doi.org/10.1371/journal.pone.0054084
	AT3G23620	Ribosomal RNA processing Brix domain protein;(source:Araport11)	ARPF2	rRNA processing	Maekawa et al, 2018; Choi et al, 2020	doi.org/10.3389/fpls.2018.01177	doi.org/10.1093/jxb/eraa019
	AT4G15770	RNA binding protein;(source:Araport11)	NIP7	Homologous to 60S ribosome subunit biogenesis protein NIP7, binds MYB73 (salt stress), CBF2 (cold stress) and TIFY8 (JA signalling)	Morello et al, 2011	doi: 10.1371/journal.pone.0029174
	AT4G17720	RNA-binding (RRM/RBD/RNP motifs) family protein;(source:Araport11)	BPL1, IRP3	rRNA processing	Palm et al, 2019	doi.org/10.1093/nar/gky1261
	AT4G32175	PNAS-3-like protein;(source:Araport11)	RRP40B	exosome complex component RRP40 (RRP40, EXOSC3); exonucleolytic trimming to generate mature 3'-end of 5.8S rRNA from tricistronic rRNA transcript (SSU-rRNA, 5.8S rRNA, LSU-rRNA)	Chantarachot et al, 2018	doi.org/10.1104/pp.17.01468
	AT5G11240	transducin family protein / WD-40 repeat family protein;(source:Araport11)	AtGHS40, GHS40, NuGWD1	18S biogenesis	Sáez-Vásquez et al, 2019	doi.org/10.1105/tpc.18.00874
	AT5G12220	las1-like family protein;(source:Araport11)	LAS1	ribosomal biogenesis protein LAS1 (LAS1)	Gasse et al, 2015	doi.org/10.1016/j.molcel.2015.10.021
	AT5G35910	Polynucleotidyl transferase, ribonuclease H fold protein with HRDC domain-containing protein;(source:Araport11)	AtRRP6L2, RRP6L2	rRNA biogenesis	Lange et al, 2008	doi:10.1128/MCB.02064-07
	AT5G38720	ribosomal RNA-processing 7 protein;(source:Araport11)	RRP7	18S maturation	Micol-Ponce et al, 2018	doi.org/10.1105/tpc.18.00245
	AT5G41190	RNA-binding NOB1-like protein;(source:Araport11)	AtNOB1, NOB1	rRNA processing	Missbach et al, 2013	doi.org/10.1371/journal.pone.0054084
	AT5G57370	U4/U6.U5 small nuclear ribonucleoprotein;(source:Araport11)		spliceosome and rRNA biogenesis	*
	AT5G66010	RNA-binding (RRM/RBD/RNP motifs) family protein;(source:Araport11)		rRNA processing	*
	AT5G05570	transducin family protein / WD-40 repeat family protein;(source:Araport11)		transmembrane chaperone (nascent protein)	*
	AT5G54200	Transducin/WD40 repeat-like superfamily protein;(source:Araport11)	WDD1	transducin	*
	AT3G61240	DEA(D/H)-box RNA helicase family protein;(source:Araport11)		helicase	*
	AT4G30780	ATP-dependent DNA helicase;(source:Araport11)		helicase	*
7 days	AT1G47970	nucleolin;(source:Araport11)		nucleolin	Cong et al, 2012	doi.org/10.1093/nar/gks720
	AT1G33970	P-loop containing nucleoside triphosphate hydrolases superfamily protein;(source:Araport11)		AT3G09720 biogenesis-related Paralog present in intersection	*
	AT4G31420	Zinc finger protein 622;(source:Araport11)	REIL1	REIL1	Cheong et al, 2021; Greber et al, 2015	doi.org/10.1038/s41598-021-81610-z	doi: 10.1016/j.cell.2015.11.027
Intersection	AT1G08410	P-loop containing nucleoside triphosphate hydrolases superfamily protein;(source:Araport11)	DIG6, LSG1-2	Encodes a large 60S subunit nuclear export GTPase 1 that is required for 40S maturation and is involved in ribosome biogenesis and affects multiple auxin-regulated development processes.	Zhao et al, 2016; Weis et al, 2014	doi: 10.1093/jxb/erv391	doi: 10.1111/tpj.12703
	AT1G12650	rRNA biogenesis RRP36-like protein;(source:Araport11)	RRP36-like	rRNA processing	Gerus et al, 2010	doi: 10.1128/MCB.00999-09
	AT1G52930	Ribosomal RNA processing Brix domain protein;(source:Araport11)	atBRX1-2	Encodes one of two Arabidopsis orthologs of yeast BRX1, a protein involved in maturation of the large ribosomal subunit.	Weis et al, 2015	doi: 10.1261/rna.047563.114
	AT1G72270	nucleolar pre-ribosomal-associated protein;(source:Araport11)	HDP1, IDAP1	rRNA processing	*
	AT1G72660	P-loop containing nucleoside triphosphate hydrolases superfamily protein;(source:Araport11)	Drg1-3	60S biogenesis	Klingauf-Nerurkar et al, 2020; O'Connel et al, 2009	doi.org/10.1016/j.pep.2009.05.009	DOI: 10.7554/eLife.52474
	AT2G47790	Transducin/WD40 repeat-like superfamily protein;(source:Araport11)	GTS1	GIGANTUS1	Gachomo et al, 2014	doi: 10.1186/1471-2229-14-37
	AT3G15460	Ribosomal RNA processing Brix domain protein;(source:Araport11)	atBRX1-1	Encodes one of two Arabidopsis orthologs of yeast BRX1, a protein involved in maturation of the large ribosomal subunit.	Weis et al, 2015	doi: 10.1261/rna.047563.114
	AT5G02430	Transducin/WD40 repeat-like superfamily protein;(source:Araport11)		transducin	*
	AT5G14610	DEAD box RNA helicase family protein;(source:Araport11)	RH46	rRNA biogenesis factor	Sulkowska et al, 2020	doi.org/10.1093/pcp/pcz186
	AT5G63120	P-loop containing nucleoside triphosphate hydrolases superfamily protein;(source:Araport11)	RH30	RNA decay and rRNA biogenesis	Mingam et al, 2004	doi.org/10.1111/j.1467-7652.2004.00084.x
